# Supplementary material for: Impact of Reactive Sulfur Species on Entamoeba histolytica: Modulating Viability, Motility, and Biofilm Degradation Capacity
Source: Antioxidants (Basel). 2024 Feb 19;13(2):245. doi: 10.3390/antiox13020245 (PMC10886169; doi:10.3390/antiox13020245)
Supplement: Supplementary file 1 [file antioxidants-13-00245-s001.zip]

Archive with 5 entries (5 files):
- figure S1.tiff
- figure S2.tiff
- figure S3.tiff
- Table S1 List of all S-sulfhydration proteins that were enriched by BTA in three independent experiments in E. histolytica trophozoites incubated with Cys-SSH..xlsx
- Table S2 Description of the parameters that are given in Table S1..pdf
