# Supplementary material for: Impact of Reactive Sulfur Species on Entamoeba histolytica: Modulating Viability, Motility, and Biofilm Degradation Capacity
Source: Antioxidants (Basel). 2024 Feb 19;13(2):245. doi: 10.3390/antiox13020245 (PMC10886169; doi:10.3390/antiox13020245)
Supplement: Supplementary file 1 [file antioxidants-13-00245-s001.zip › Table S1 List of all S-sulfhydration proteins that were enriched by BTA in three independent experiments in E. histolytica trophozoites incubated with Cys-SSH..xlsx]

## Sheet: proteinGroups-perseus 82221-6
Razor + unique peptides >1
p-value < 0.05
q-value < 0.05
Difference >1 (fold change >2)
p-value < 0.05 & Difference >1 & Razor + unique peptides >1
p-value < 0.05 & q-value < 0.05 & Difference >1 & Razor + unique peptides >1				Log2
Protein names	Gene names	Protein IDs	Majority protein IDs	Intensity WT+Cys-SSH-1_1	Intensity WT+Cys-SSH-2_1	Intensity WT+Cys-SSH-3_1	Intensity WT-1_1	Intensity WT-2_1	Intensity WT-3_1	Student's T-test p-value Intensity WT+Cys-SSH_Intensity WT	Student's T-test q-value Intensity WT+Cys-SSH_Intensity WT	Student's T-test Difference Intensity WT+Cys-SSH_Intensity WT	Student's T-test Significant Intensity WT+Cys-SSH_Intensity WT	Student's T-test significant	Razor + unique peptides	Razor + unique peptides WT+Cys-SSH-1	Razor + unique peptides WT+Cys-SSH-2	Razor + unique peptides WT+Cys-SSH-3	Razor + unique peptides WT-1	Razor + unique peptides WT-2	Razor + unique peptides WT-3	Unique peptides	Sequence coverage [%]	Unique + razor sequence coverage [%]	Unique sequence coverage [%]	Mol. weight [kDa]	Q-value	Score	Intensity	iBAQ peptides	MS/MS count	Unique peptides WT+Cys-SSH-1	Unique peptides WT+Cys-SSH-2	Unique peptides WT+Cys-SSH-3	Unique peptides WT-1	Unique peptides WT-2	Unique peptides WT-3	Sequence length	Sequence lengths	Sequence coverage WT+Cys-SSH-1 [%]	Sequence coverage WT+Cys-SSH-2 [%]	Sequence coverage WT+Cys-SSH-3 [%]	Sequence coverage WT-1 [%]	Sequence coverage WT-2 [%]	Sequence coverage WT-3 [%]	Intensity WT+Cys-SSH-1	Intensity WT+Cys-SSH-2	Intensity WT+Cys-SSH-3	Intensity WT-1
Mannose-6-phosphate isomerase, putative; mannose-6-phosphate isomerase	EHI_002010	B1N3V1;C4M8I8	B1N3V1;C4M8I8	23.944	23.9537	23.9319	19	19	19	9.78e-09	1.6e-05	4.94322	+	Intensity WT+Cys-SSH_Intensity WT	1	1	1	1	1	0	1	1	4.6	4.6	4.6	27.743	0	6.6148	48390000	11	5	1	1	1	1	0	1	241	NaN	4.6	4.6	4.6	4.6	0	4.6	16139000	16247000	16004000	0
Uncharacterized protein	EHI_044490	C4LT71	C4LT71	22.5147	22.5855	22.5387	19	19	19	9.57e-07	0.000785559	3.5463	+	Intensity WT+Cys-SSH_Intensity WT	2	1	1	2	0	0	0	2	6	6	6	50.982	0.00073964	2.0787	18379000	21	4	1	1	2	0	0	0	448	448	2.9	2.9	6	0	0	0	5992300	6293900	6092900	0
Mic1 domain-containing protein	EHI_013020	C4LX73	C4LX73	19	19	19	22.0089	21.8949	19	6.57e-06	0.00359236	-2.95189	+	Intensity WT+Cys-SSH_Intensity WT	1	0	0	0	1	1	1	1	1.5	1.5	1.5	78.957	0.0013937	1.6937	8119800	35	3	0	0	0	1	1	1	672	672	0	0	0	1.5	1.5	1.5	0	0	0	4220200
TPR repeat protein	EHI_142940	C4M6D0	C4M6D0	22.8914	22.6468	22.6991	19	19	19	3.7e-05	0.0151951	3.74575	+	Intensity WT+Cys-SSH_Intensity WT	2	1	1	2	0	0	0	2	2.2	2.2	2.2	108.49	0	5.1845	21157000	54	3	1	1	2	0	0	0	922	922	1.4	1.4	2.2	0	0	0	7780200	6566900	6809400	0
Helicase, putative; ATP-dependent RNA helicase	EHI_151600	C4LSK1;B1N3F1	C4LSK1;B1N3F1	28.0719	27.5767	27.4139	19	19	19	5.59e-05	0.018343	8.68749	+	Intensity WT+Cys-SSH_Intensity WT	8	8	7	5	0	0	0	6	22.2	22.2	17.7	47.289	0	52.868	661140000	23	23	6	6	5	0	0	0	419	NaN	22.2	19.6	14.8	0	0	0	282150016	200180000	178810000	0
Sel1 repeat-containing protein	EHI_187760	C4M9I6	C4M9I6	25.0109	25.417	24.9341	19	19	19	6.93e-05	0.0189658	6.12065	+	Intensity WT+Cys-SSH_Intensity WT	4	2	3	3	0	0	0	4	14.5	14.5	14.5	26.419	0	3.2566	110660000	14	9	2	3	3	0	0	0	241	241	7.5	10.8	11.2	0	0	0	33808000	44800000	32056000	0
Uncharacterized protein	EHI_081920	C4M5T4;B1N5K1	C4M5T4;B1N5K1	24.8147	24.2964	24.756	19	19	19	0.000116866	0.024143	5.62238	+	Intensity WT+Cys-SSH_Intensity WT	4	2	3	2	0	0	0	4	5.4	5.4	5.4	95.929	0	4.9135	78448000	49	7	2	3	2	0	0	0	829	NaN	2.4	4.3	2.7	0	0	0	29510000	20604000	28334000	0
Uncharacterized protein	EHI_160980	C4M2R6	C4M2R6	23.5705	24.0383	23.7012	19	19	19	0.000117699	0.024143	4.76998	+	Intensity WT+Cys-SSH_Intensity WT	4	2	3	1	0	0	0	4	11.8	11.8	11.8	33.833	0	6.3236	43324000	19	5	2	3	1	0	0	0	304	304	6.9	7.9	3	0	0	0	12457000	17228000	13639000	0
isoleucine--tRNA ligase	EHI_177660	C4LY19	C4LY19	26.1857	25.5152	26.1513	19	19	19	0.000145487	0.0243956	6.95071	+	Intensity WT+Cys-SSH_Intensity WT	8	4	6	5	0	0	0	8	7.6	7.6	7.6	122.77	0	14.393	198810000	51	17	4	6	5	0	0	0	1056	1056	3.8	5.8	4.8	0	0	0	76325000	47956000	74527000	0
Competence protein ComEC, putative	EHI_166400	C4M7E7	C4M7E7	23.3016	22.9588	23.4003	19	19	19	0.000150195	0.0243956	4.22024	+	Intensity WT+Cys-SSH_Intensity WT	1	1	1	1	0	0	0	1	2.5	2.5	2.5	45.325	0.00076104	2.2533	29562000	13	2	1	1	1	0	0	0	400	400	2.5	2.5	2.5	0	0	0	10339000	8152700	11071000	0
60S ribosomal protein L22	EHI_141940	C4LW40	C4LW40	29.6021	29.9704	30.1846	24.7526	24.5447	24.4665	0.000188898	0.0243956	5.27035	+	Intensity WT+Cys-SSH_Intensity WT	5	3	3	4	1	1	1	5	42.3	42.3	42.3	15.847	0	151.24	3163100000	3	29	3	3	4	1	1	1	137	137	28.5	20.4	41.6	13.1	13.1	13.1	814910016	1051899968	1220300032	28266000
non-specific serine/threonine protein kinase	EHI_004790	A0A8U0WQ28	A0A8U0WQ28	24.6726	24.0249	24.3581	19	19	19	0.000200976	0.0243956	5.35186	+	Intensity WT+Cys-SSH_Intensity WT	2	2	1	2	0	0	0	2	10.7	10.7	10.7	39.389	0	37.63	65315000	14	9	2	1	2	0	0	0	347	347	10.7	6.1	10.7	0	0	0	26742000	17069000	21504000	0
40S ribosomal protein S10, putative	EHI_197030	C4LVC0	C4LVC0	26.8281	25.9708	26.6557	19	19	19	0.000201575	0.0243956	7.48485	+	Intensity WT+Cys-SSH_Intensity WT	3	2	1	2	0	0	0	3	21.3	21.3	21.3	14.55	0	5.9047	290620000	6	4	2	1	2	0	0	0	127	127	19.7	10.2	11.8	0	0	0	119140000	65764000	105720000	0
VHS domain-containing protein	EHI_188100	C4M184	C4M184	21.4002	21.7	21.4833	19	19	19	0.000208128	0.0243956	2.52785	+	Intensity WT+Cys-SSH_Intensity WT	2	1	1	1	0	0	0	2	9.8	9.8	9.8	45.48	0	6.026	9106200	24	1	1	1	1	0	0	0	397	397	5.5	4.3	5.5	0	0	0	2767600	3406900	2931700	0
Ras-like GTP-binding protein RHO1; Rho family GTPase	RHO1	P31021;C4M0Y0	P31021;C4M0Y0	29.3682	28.0931	28.8904	19	19	19	0.000258387	0.0248603	9.7839	+	Intensity WT+Cys-SSH_Intensity WT	10	10	8	8	0	0	0	10	51.6	51.6	51.6	23.767	0	60.887	1476900000	16	41	10	8	8	0	0	0	215	NaN	51.6	39.5	39.5	0	0	0	692940032	286329984	497609984	0
Phosphatidate cytidylyltransferase, putative	EHI_054750	C4M2J4	C4M2J4	26.3052	25.6125	25.4566	19	19	19	0.00026634	0.0248603	6.7914	+	Intensity WT+Cys-SSH_Intensity WT	3	3	3	2	0	0	0	3	11.2	11.2	11.2	33.753	0	7.5812	180260000	7	18	3	3	2	0	0	0	295	295	11.2	11.2	6.1	0	0	0	82917000	51300000	46046000	0
ADP-ribosylation factor, putative	EHI_194500	A0A8U0WPG3	A0A8U0WPG3	26.838	25.9233	26.098	19	19	19	0.000267876	0.0248603	7.28643	+	Intensity WT+Cys-SSH_Intensity WT	4	4	4	3	0	0	0	4	26.3	26.3	26.3	20.7	0	21.268	255420000	12	14	4	4	3	0	0	0	179	179	26.3	26.3	19	0	0	0	119960000	63636000	71824000	0
asparagine--tRNA ligase	EHI_126920	C4LWW8	C4LWW8	27.9212	27.043	26.8779	19	19	19	0.00028105	0.0248603	8.28073	+	Intensity WT+Cys-SSH_Intensity WT	10	6	7	6	0	0	0	10	23.7	23.7	23.7	52.008	0	61.142	515790000	26	30	6	7	6	0	0	0	451	451	16	15.7	16.6	0	0	0	254170000	138280000	123330000	0
Proteasome subunit beta	EHI_137970	C4LZF8	C4LZF8	22.5565	22.7485	23.0688	19	19	19	0.000287841	0.0248603	3.7913	+	Intensity WT+Cys-SSH_Intensity WT	1	1	1	1	0	0	0	1	10.2	10.2	10.2	25.04	0	16.399	22014000	7	4	1	1	1	0	0	0	225	225	10.2	10.2	10.2	0	0	0	6168700	7046700	8798600	0
Leucine-rich repeat containing protein	EHI_024640	C4M0K6	C4M0K6	24.4186	23.71	24.3262	19	19	19	0.000377584	0.0263958	5.15158	+	Intensity WT+Cys-SSH_Intensity WT	2	2	1	1	0	0	0	2	3.7	3.7	3.7	56.289	0.0013812	1.6139	57181000	24	4	2	1	1	0	0	0	508	508	3.7	2	2	0	0	0	22425000	13722000	21033000	0
60S ribosomal protein L18, putative	EHI_079190	C4LXC8	C4LXC8	29.0227	28.0048	29.4361	19	19	19	0.000380969	0.0263958	9.82117	+	Intensity WT+Cys-SSH_Intensity WT	8	6	5	7	0	0	0	8	41.1	41.1	41.1	18.993	0	39.835	1541000000	8	34	6	5	7	0	0	0	168	168	32.1	23.2	40.5	0	0	0	545369984	269329984	726329984	0
Fungal lipase-like domain-containing protein	EHI_032470	C4MB72;C4MAW4	C4MB72	24.9241	24.2807	24.1582	19	19	19	0.000387501	0.0263958	5.45433	+	Intensity WT+Cys-SSH_Intensity WT	8	4	5	3	0	0	0	8	12.3	12.3	12.3	95.043	0	11.431	70937000	31	13	4	5	3	0	0	0	837	NaN	5.7	8.1	3.9	0	0	0	31835000	20380000	18722000	0
Skp1 protein, putative	EHI_066770	C4M261	C4M261	25.0347	24.1771	24.6906	19	19	19	0.000405723	0.0263958	5.63411	+	Intensity WT+Cys-SSH_Intensity WT	2	2	2	2	0	0	0	2	15.2	15.2	15.2	18.226	0	10.595	80415000	11	10	2	2	2	0	0	0	158	158	15.2	15.2	15.2	0	0	0	34371000	18968000	27077000	0
Uncharacterized protein	EHI_112850	C4M9M4	C4M9M4	25.1031	24.7553	24.2186	19	19	19	0.000432792	0.0263958	5.69235	+	Intensity WT+Cys-SSH_Intensity WT	6	3	2	1	0	0	0	6	16.2	16.2	16.2	45.15	0	3.0341	83883000	28	5	3	2	1	0	0	0	396	396	10.1	4	2	0	0	0	36041000	28320000	19522000	0
Leucine-rich repeat containing protein	EHI_177990	C4M553	C4M553	24.1334	23.753	23.3738	19	19	19	0.000459779	0.0263958	4.75339	+	Intensity WT+Cys-SSH_Intensity WT	4	3	3	2	0	0	0	4	6.1	6.1	6.1	99.073	0	12.742	43409000	49	8	3	3	2	0	0	0	883	883	4.2	4.5	3.5	0	0	0	18402000	14137000	10870000	0
Rab family GTPase	EHI_024680	A0A8U0WPH8	A0A8U0WPH8	27.2619	26.0415	26.5097	19	19	19	0.000478403	0.0263958	7.6044	+	Intensity WT+Cys-SSH_Intensity WT	8	7	5	5	0	0	0	8	48.6	48.6	48.6	24.495	0	63.823	325560000	16	17	7	5	5	0	0	0	212	212	45.3	24.1	33	0	0	0	160940000	69069000	95547000	0
C2 domain-containing protein	EHI_189170	C4M9K8	C4M9K8	22.0174	21.8407	22.3327	19	19	19	0.000485055	0.0263958	3.06358	+	Intensity WT+Cys-SSH_Intensity WT	4	1	1	3	0	0	0	4	7.2	7.2	7.2	84.127	0	4.8481	13283000	31	5	1	1	3	0	0	0	747	747	1.9	1.6	5.4	0	0	0	4245100	3755900	5282000	0
CCT-beta	EHI_103270	C4LVH2	C4LVH2	24.0362	23.4849	24.269	19	19	19	0.000490993	0.0263958	4.93003	+	Intensity WT+Cys-SSH_Intensity WT	1	1	1	1	0	0	0	1	1.7	1.7	1.7	58.28	0	2.3567	49159000	29	3	1	1	1	0	0	0	533	533	1.7	1.7	1.7	0	0	0	17203000	11740000	20216000	0
Esophageal cancer associated protein	EHI_000470	C4LZ98	C4LZ98	24.6851	24.2988	23.8229	19	19	19	0.000496172	0.0263958	5.26892	+	Intensity WT+Cys-SSH_Intensity WT	2	1	2	2	0	0	0	2	2.9	2.9	2.9	85.161	0	6.7899	62451000	42	8	1	2	2	0	0	0	754	754	1.7	2.9	2.9	0	0	0	26974000	20638000	14839000	0
Ubiquitin carboxyl-terminal hydrolase domain containing protein	EHI_045440	C4LTF7	C4LTF7	25.4293	24.4569	24.9174	19	19	19	0.000496267	0.0263958	5.93455	+	Intensity WT+Cys-SSH_Intensity WT	4	4	3	3	0	0	0	4	2.8	2.8	2.8	172.02	0	4.6319	99901000	84	16	4	3	3	0	0	0	1477	1477	2.8	2.2	2	0	0	0	45185000	23028000	31688000	0
Rho-related protein racA; Rho family GTPase	RACA;	Q24814;C4M8K6;Q24815	Q24814;C4M8K6	32.303	30.9948	31.7696	23.4153	23.7516	23.5169	0.000529318	0.0263958	8.10564	+	Intensity WT+Cys-SSH_Intensity WT	9	9	7	8	1	2	2	9	43.9	43.9	43.9	21.765	0	60.416	11137000000	9	65	9	7	8	1	2	2	196	NaN	43.9	31.1	35.2	4.6	10.2	10.2	5298800128	2139699968	3660999936	11187000
Uncharacterized protein	EHI_057830	C4M703	C4M703	28.4558	27.0818	27.3725	19	19	19	0.00053061	0.0263958	8.6367	+	Intensity WT+Cys-SSH_Intensity WT	7	6	6	5	0	0	0	7	21	21	21	42.631	0	23.159	683980000	16	23	6	6	5	0	0	0	366	366	17.2	17.8	13.9	0	0	0	368160000	142050000	173760000	0
Phosphoribulokinase /uridine kinase family protein	EHI_087540	C4LXT6	C4LXT6	23.7596	23.6899	24.4494	19	19	19	0.000543948	0.0263958	4.96629	+	Intensity WT+Cys-SSH_Intensity WT	5	2	3	4	0	0	0	5	11	11	11	61.421	0	8.1481	50643000	29	8	2	3	4	0	0	0	543	543	5.2	5.9	9.6	0	0	0	14202000	13532000	22909000	0
Coatomer subunit beta	EHI_027720	A0A8U0WPC9	A0A8U0WPC9	28.0485	27.4603	27.3277	23.0971	23.0158	19	0.000546897	0.0263958	4.55571	+	Intensity WT+Cys-SSH_Intensity WT	16	12	9	9	2	1	0	16	21.7	21.7	21.7	94.791	0	94.837	648170000	44	50	12	9	9	2	1	0	843	843	15.3	12.1	13.3	2.7	1.3	0	277620000	184660000	168440000	8972900
Aldose 1-epimerase	EHI_094090	A0A8U0WNW4	A0A8U0WNW4	27.4496	26.1356	27.1195	19	19	19	0.000582522	0.027312	7.90155	+	Intensity WT+Cys-SSH_Intensity WT	3	2	3	3	0	0	0	3	8.5	8.5	8.5	38.753	0	8.0565	402810000	15	12	2	3	3	0	0	0	341	341	5.9	8.5	8.5	0	0	0	183290000	73721000	145810000	0
40S ribosomal protein S13, putative	EHI_112880	C4M9M7;A0A175JJM9	C4M9M7;A0A175JJM9	28.5686	27.6077	29.282	19	19	19	0.000624751	0.0274505	9.48608	+	Intensity WT+Cys-SSH_Intensity WT	7	7	4	7	0	0	0	7	39.2	39.2	39.2	16.659	0	46.667	1255400000	9	41	7	4	7	0	0	0	148	NaN	39.2	27.7	39.2	0	0	0	398100000	204520000	652780032	0
Ccaat-box-binding transcription factor, putative	EHI_132370	C4M8Q0	C4M8Q0	26.0816	25.2359	26.435	19	19	19	0.000635359	0.0274505	6.9175	+	Intensity WT+Cys-SSH_Intensity WT	5	4	3	5	0	0	0	5	7.4	7.4	7.4	83.629	0	14.376	201260000	38	12	4	3	5	0	0	0	718	718	6.3	4.5	7.4	0	0	0	71016000	39514000	90726000	0
Rab family GTPase	EHI_194280	A0A8U0WQ58	A0A8U0WQ58	25.3507	24.6389	24.3502	19	19	19	0.00063566	0.0274505	5.77997	+	Intensity WT+Cys-SSH_Intensity WT	3	3	2	2	0	0	0	3	24.2	18.6	18.6	21.759	0	7.4631	90301000	13	7	3	2	2	0	0	0	194	194	24.2	17	17	5.7	5.7	5.7	42789000	26125000	21387000	0
Phospholipid-transporting ATPase	EHI_049640	C4LUG5	C4LUG5	25.7294	24.612	25.16	19	19	19	0.00066815	0.0278103	6.16716	+	Intensity WT+Cys-SSH_Intensity WT	4	4	2	3	0	0	0	3	5.4	5.4	4.1	122.35	0	30.59	118770000	51	8	3	1	2	0	0	0	1068	1068	5.4	2.2	3.7	0	0	0	55633000	25642000	37491000	0
60S ribosomal protein L13, putative	EHI_017700	C4M3F3	C4M3F3	27.8848	27.9704	28.3376	25.1689	24.8776	23.9979	0.000710127	0.0278103	3.04106	+	Intensity WT+Cys-SSH_Intensity WT	5	4	5	4	2	2	2	1	20	20	3.4	23.13	0	43.23	935340000	11	42	1	1	1	0	0	0	205	205	16.6	20	16.6	8.8	8.8	8.8	247840000	262980000	339220000	37722000
Rab family GTPase	EHI_012030	C4LTJ7	C4LTJ7	25.2111	24.5891	24.1693	19	19	19	0.000714398	0.0278103	5.6565	+	Intensity WT+Cys-SSH_Intensity WT	3	3	2	2	0	0	0	3	17	17	17	20.477	0	10.662	82946000	10	9	3	2	2	0	0	0	182	182	17	11	11	0	0	0	38842000	25238000	18866000	0
Cation transporter, putative	EHI_026390	C4M5V5	C4M5V5	26.2976	25.6104	25.0644	19	19	19	0.000717892	0.0278103	6.65745	+	Intensity WT+Cys-SSH_Intensity WT	4	2	3	2	0	0	0	4	6.8	6.8	6.8	52.623	0	9.4705	168790000	15	14	2	3	2	0	0	0	471	471	5.1	5.9	5.1	0	0	0	82481000	51228000	35085000	0
MMS19 nucleotide excision repair protein	EHI_129310	C4M9W4	C4M9W4	23.4529	23.6343	22.864	19	19	19	0.000728728	0.0278103	4.31706	+	Intensity WT+Cys-SSH_Intensity WT	4	2	3	2	0	0	0	4	4.8	4.8	4.8	100.23	0	7.0213	32136000	42	7	2	3	2	0	0	0	868	868	3.1	3.9	2.6	0	0	0	11482000	13021000	7633800	0
Rab family GTPase	EHI_079890	A0A8U0WP86	A0A8U0WP86	27.864	26.3226	27.326	19	19	22.806	0.000787008	0.0291026	8.1709	+	Intensity WT+Cys-SSH_Intensity WT	8	6	5	5	0	0	1	8	46.2	46.2	46.2	21.925	0	20.944	503800000	14	20	6	5	5	0	0	1	195	195	35.9	30.3	27.2	0	0	5.6	244290000	83928000	168250000	0
Importin beta family protein 3	EHI_098340	C4LXB7	C4LXB7	27.0981	26.7482	27.1884	24.3578	24.0828	21.494	0.000812627	0.0291026	2.79124	+	Intensity WT+Cys-SSH_Intensity WT	10	5	6	8	2	2	1	10	10.5	10.5	10.5	125.25	0	218.35	451540000	53	35	5	6	8	2	2	1	1097	1097	6.1	6.7	8.7	2.6	2.6	1.2	143660000	112720000	152940000	21500000
Rab-GAP TBC domain-containing protein	EHI_069260	C4LWL4	C4LWL4	25.9267	24.7586	25.74	19	19	19	0.000815794	0.0291026	6.4751	+	Intensity WT+Cys-SSH_Intensity WT	6	3	3	5	0	0	0	6	16.3	16.3	16.3	41.711	0	5.727	148210000	21	10	3	3	5	0	0	0	350	350	7.1	8	14.3	0	0	0	63784000	28384000	56043000	0
AIG1 family protein, putative	EHI_180390	C4M288	C4M288	23.5818	23.6625	24.4718	19	19	19	0.000904436	0.030849	4.90538	+	Intensity WT+Cys-SSH_Intensity WT	4	2	3	4	0	0	0	4	15.2	15.2	15.2	38.7	0	17.791	49100000	22	8	2	3	4	0	0	0	335	335	7.8	11.9	15.2	0	0	0	12555000	13278000	23268000	0
Aspartate ammonia-lyase, putative	EHI_150390	C4M220;B1N3V9	C4M220	27.222	25.714	26.4602	19	19	19	0.00092201	0.030849	7.46537	+	Intensity WT+Cys-SSH_Intensity WT	9	8	4	6	0	0	0	9	21	21	21	52.337	0	59.141	303900000	22	21	8	4	6	0	0	0	472	NaN	19.3	9.7	13.8	0	0	0	156540000	55040000	92323000	0
Uncharacterized protein	EHI_019070	C4M8A0	C4M8A0	23.6056	22.8025	22.9997	19	19	19	0.000927222	0.030849	4.13592	+	Intensity WT+Cys-SSH_Intensity WT	6	5	2	3	0	0	0	6	6.1	6.1	6.1	138.5	0	11.425	28466000	63	11	5	2	3	0	0	0	1189	1189	5.2	1.7	3	0	0	0	12764000	7315200	8386900	0
EF-hand calcium-binding domain containing protein	EHI_016120	C4MAN5	C4MAN5	24.7667	23.8161	24.8067	19	19	19	0.00096708	0.030849	5.46315	+	Intensity WT+Cys-SSH_Intensity WT	5	4	3	3	0	0	0	5	8.4	8.4	8.4	75.833	0	6.1978	72660000	38	11	4	3	3	0	0	0	658	658	6.8	5.5	5.6	0	0	0	28544000	14769000	29347000	0
Opioid growth factor receptor (OGFr) conserved domain-containing protein	EHI_158620	C4M7G6	C4M7G6	23.1298	22.6186	23.4505	19	19	19	0.000982048	0.030849	4.06631	+	Intensity WT+Cys-SSH_Intensity WT	1	1	1	1	0	0	0	1	2	2	2	47.61	0.0074488	1.0718	27081000	25	3	1	1	1	0	0	0	402	402	2	2	2	0	0	0	9178500	6440000	11463000	0
Glycerophosphoryl diester phosphodiesterase, putative	EHI_113970	C4M8W3	C4M8W3	26.3975	25.0988	25.3585	19	19	19	0.00100078	0.030849	6.61826	+	Intensity WT+Cys-SSH_Intensity WT	3	3	2	2	0	0	0	3	9.5	9.5	9.5	43.575	0	59.177	167350000	13	8	3	2	2	0	0	0	380	380	9.5	6.6	6.6	0	0	0	88398000	35933000	43019000	0
Protein SEY1 homolog 1	EHI_012280	C4LTM1	C4LTM1	29.3238	27.3783	28.3645	19	19	19	0.00100476	0.030849	9.35553	+	Intensity WT+Cys-SSH_Intensity WT	20	15	11	13	0	1	0	20	20.9	20.9	20.9	112.12	0	107.78	1192000000	57	64	15	11	13	0	1	0	959	959	15.1	10.4	12.8	0	1.6	0	671950016	174460000	345590016	0
GOLD domain-containing protein	EHI_138080	C4LZG8	C4LZG8	27.2861	25.8333	26.0727	19	19	19	0.00104299	0.030849	7.39738	+	Intensity WT+Cys-SSH_Intensity WT	4	4	3	3	0	0	0	4	16.7	16.7	16.7	23.374	0	45.188	294030000	10	17	4	3	3	0	0	0	203	203	16.7	15.8	15.8	0	0	0	163660000	59785000	70579000	0
aminoacyl-tRNA hydrolase	EHI_098230	C4LXA6	C4LXA6	23.3777	22.7484	22.6013	19	19	19	0.00104881	0.030849	3.90912	+	Intensity WT+Cys-SSH_Intensity WT	2	1	2	1	0	0	0	2	20.6	20.6	20.6	17.726	0	5.1977	24308000	8	5	1	2	1	0	0	0	160	160	10	20.6	10	0	0	0	10899000	7045900	6363200	0
S-phase kinase-associated protein 1A, putative	EHI_134960	C4M0Y3	C4M0Y3	24.6201	23.9184	25.0804	19	19	19	0.00105274	0.030849	5.53965	+	Intensity WT+Cys-SSH_Intensity WT	2	1	1	2	0	0	0	2	13.9	13.9	13.9	18.496	0	5.669	77119000	9	4	1	1	2	0	0	0	158	158	8.9	8.9	13.9	0	0	0	25786000	15855000	35478000	0
Membrane-bound O-acyltransferase (MBOAT ) family protein	EHI_086180	C4M373	C4M373	27.216	26.0984	25.693	19	19	19	0.00110935	0.0314581	7.3358	+	Intensity WT+Cys-SSH_Intensity WT	4	3	4	4	0	0	0	4	7.6	7.6	7.6	57.362	0	11.298	281980000	21	21	3	4	4	0	0	0	487	487	5.1	7.6	7.6	0	0	0	155890000	71848000	54245000	0
Rab family GTPase	EHI_143650	A0A8U0WP91	A0A8U0WP91	30.4595	28.9111	29.5709	22.2197	22.5496	19	0.00116697	0.0314581	7.26249	+	Intensity WT+Cys-SSH_Intensity WT	12	12	6	9	1	1	0	12	59.6	59.6	59.6	22.631	0	176.61	2789800000	15	51	12	6	9	1	1	0	208	208	59.6	28.8	40.4	6.7	6.7	0	1476499968	504780000	797489984	4884300
C2 domain containing protein	EHI_069320	C4LWM0	C4LWM0	23.9593	23.0084	23.7603	19	19	19	0.00117389	0.0314581	4.57603	+	Intensity WT+Cys-SSH_Intensity WT	1	1	1	1	0	0	0	1	7.4	7.4	7.4	20.664	0.00070028	1.7123	38958000	6	5	1	1	1	0	0	0	188	188	7.4	7.4	7.4	0	0	0	16311000	8437800	14209000	0
Uncharacterized protein	EHI_030450	C4M457	C4M457	28.1759	27.2919	27.8276	23.5594	23.7224	23.2024	0.00117919	0.0314581	4.12423	+	Intensity WT+Cys-SSH_Intensity WT	18	12	9	13	2	3	2	18	19.9	19.9	19.9	106.56	0	92.329	741620000	57	68	12	9	13	2	3	2	930	930	15.2	9.6	13.8	2.5	4.1	2.3	303249984	164320000	238200000	12362000
L-type lectin-like domain-containing protein	EHI_000280	C4LZ91	C4LZ91	25.0162	24.4153	25.7438	19	19	19	0.00118053	0.0314581	6.05841	+	Intensity WT+Cys-SSH_Intensity WT	6	4	4	5	0	0	0	6	14.2	14.2	14.2	42.507	0	3.6825	112500000	28	14	4	4	5	0	0	0	380	380	12.1	9.2	14.2	0	0	0	33934000	22373000	56188000	0
Gal/GalNAc lectin light subunit	EHI_148790	C4LT47	C4LT47	28.0099	27.3841	27.8869	24.7577	24.7488	24.0141	0.00119528	0.0314581	3.00708	+	Intensity WT+Cys-SSH_Intensity WT	5	4	5	4	3	3	3	3	22.2	22.2	17.8	31.582	0	84.385	767130000	17	50	2	3	2	1	1	1	270	270	17.4	22.2	17.4	9.3	9.3	9.3	270289984	175160000	248190000	28366000
Sulfotransferase	EHI_140740	C4M3P6	C4M3P6	28.0758	26.2716	27.5629	19	19	19	0.00125033	0.0314581	8.30342	+	Intensity WT+Cys-SSH_Intensity WT	12	9	6	8	0	0	0	12	34.5	34.5	34.5	52.309	0	98.708	562200000	25	61	9	6	8	0	0	0	446	446	24.9	15.9	26.5	0	0	0	282920000	81008000	198270000	0
Sodium/hydrogen exchanger	EHI_176180	C4MB25;C4LVG9	C4MB25;C4LVG9	24.5272	24.483	23.5013	19	19	19	0.00125696	0.0314581	5.17049	+	Intensity WT+Cys-SSH_Intensity WT	2	2	2	2	0	0	0	2	5.3	5.3	5.3	66.919	0	15.899	59501000	12	8	2	2	2	0	0	0	604	NaN	5.3	5.3	5.3	0	0	0	24178000	23448000	11874000	0
Ras-1, putative	EHI_124520	B1N354	B1N354	28.7602	27.8758	28.2752	24.2407	23.8226	23.1709	0.00134045	0.0314581	4.27207	+	Intensity WT+Cys-SSH_Intensity WT	4	3	3	3	1	1	1	4	18	18	18	22.741	0	32.635	1069900000	12	19	3	3	3	1	1	1	200	200	14.5	12.5	14.5	5.5	5.5	5.5	454649984	246290000	324840000	19823000
Short chain dehydrogenase family protein	EHI_118210	C4LZ04	C4LZ04	21.789	22.1597	21.5142	19	19	19	0.00134728	0.0314581	2.82097	+	Intensity WT+Cys-SSH_Intensity WT	3	2	1	1	0	0	0	3	14.4	14.4	14.4	35.553	0	4.6641	11304000	17	4	2	1	1	0	0	0	306	306	10.1	4.2	4.9	0	0	0	3623500	4685400	2995200	0
Rab family GTPase	EHI_040310	A0A8U0WPB0	A0A8U0WPB0	29.036	27.2621	27.2766	19	19	19	0.0013581	0.0314581	8.85824	+	Intensity WT+Cys-SSH_Intensity WT	14	14	11	10	0	0	0	14	68.9	68.9	68.9	21.262	0	158.07	873970000	12	44	14	11	10	0	0	0	193	193	68.9	63.7	51.8	0	0	0	550440000	160960000	162580000	0
ADP-ribosylation factor, putative	EHI_092730	A0A8U0WQ42	A0A8U0WQ42	24.9848	23.987	23.8745	19	19	19	0.00137755	0.0314581	5.2821	+	Intensity WT+Cys-SSH_Intensity WT	3	2	1	2	0	0	0	3	19.7	19.7	19.7	20.397	0	6.5118	65209000	11	7	2	1	2	0	0	0	183	183	13.7	8.2	14.2	0	0	0	33203000	16627000	15379000	0
Serine/threonine-protein phosphatase	EHI_147720	C4M907	C4M907	24.6375	23.4623	24.1846	19	19	19	0.0014002	0.0314581	5.09479	+	Intensity WT+Cys-SSH_Intensity WT	1	1	1	1	0	0	0	1	3.9	3.9	3.9	34.75	0	4.3638	56724000	18	3	1	1	1	0	0	0	304	304	3.9	3.9	3.9	0	0	0	26100000	11557000	19067000	0
Uncharacterized protein	EHI_109920	C4M3L1	C4M3L1	25.6232	24.3672	24.5401	19	19	19	0.00140553	0.0314581	5.84349	+	Intensity WT+Cys-SSH_Intensity WT	4	3	3	3	0	0	0	4	8.7	8.7	8.7	52.68	0	8.708	97717000	17	9	3	3	3	0	0	0	497	497	6.4	7.2	7.2	0	0	0	51683000	21640000	24395000	0
Rab family GTPase	EHI_059670	B1N3J0	B1N3J0	27.0978	25.5729	25.7488	19	19	19	0.00141804	0.0314581	7.13982	+	Intensity WT+Cys-SSH_Intensity WT	9	7	5	7	0	0	0	9	18	17.1	17.1	86.286	0	55.838	249920000	21	26	7	5	7	0	0	0	750	750	14.8	10.8	13.5	0.9	0	0.9	143630000	49912000	56384000	0
Tubulin alpha chain	A-TUB;EH	P31017;C4LYU0	P31017;C4LYU0	24.1712	23.2346	24.2733	19	19	19	0.00142359	0.0314581	4.89302	+	Intensity WT+Cys-SSH_Intensity WT	3	2	2	1	1	0	0	3	8.6	8.6	8.6	50.259	0	8.7441	49036000	22	8	2	2	1	1	0	0	455	NaN	6.6	5.3	3.3	3.3	0	0	18891000	9869800	20276000	0
HTH La-type RNA-binding domain-containing protein	EHI_142210	C4LW65	C4LW65	25.9036	24.4576	25.1587	19	19	19	0.00142816	0.0314581	6.17329	+	Intensity WT+Cys-SSH_Intensity WT	1	1	1	1	0	0	0	1	8.6	8.6	8.6	23.65	0	48.101	123260000	10	11	1	1	1	0	0	0	209	209	8.6	8.6	8.6	0	0	0	62770000	23040000	37455000	0
Cysteine-rich surface protein, putative	EHI_069390	C4LWM7	C4LWM7	25.068	24.3228	23.8003	19	19	19	0.00146165	0.0314581	5.39703	+	Intensity WT+Cys-SSH_Intensity WT	1	1	1	1	0	0	0	1	5.3	5.3	5.3	34.236	0	14.202	70767000	10	5	1	1	1	0	0	0	304	304	5.3	5.3	5.3	0	0	0	35175000	20984000	14608000	0
Uncharacterized protein	EHI_131160	C4LXI4;C4LYD6	C4LXI4;C4LYD6	26.0894	24.6204	25.1583	19	19	20.3735	0.00146589	0.0314581	6.2894	+	Intensity WT+Cys-SSH_Intensity WT	7	5	3	4	0	1	1	7	22.2	22.2	22.2	40.113	0	251.42	136000000	22	18	5	3	4	0	1	1	351	NaN	17.9	10	14.2	0	5.4	5.4	71401000	25792000	37447000	0
Transmembrane protein	EHI_027530	C4M1U1	C4M1U1	27.8523	26.0956	26.4624	19	19	19	0.00148725	0.0314581	7.80341	+	Intensity WT+Cys-SSH_Intensity WT	2	2	2	2	0	0	0	2	5.3	5.3	5.3	42.454	0	9.8809	406480000	10	8	2	2	2	0	0	0	374	374	5.3	5.3	5.3	0	0	0	242310000	71704000	92465000	0
Rab family GTPase	EHI_082070	A0A8U0WNY7	A0A8U0WNY7	26.4912	24.9172	26.0665	19	19	19	0.00150821	0.0314581	6.82496	+	Intensity WT+Cys-SSH_Intensity WT	2	2	2	2	0	0	0	2	9.3	9.3	9.3	22.904	0	28.819	196290000	13	8	2	2	2	0	0	0	204	204	9.3	9.3	9.3	0	0	0	94329000	31682000	70276000	0
Nuclear complex protein 4	EHI_119610	C4M7Y4	C4M7Y4	22.8087	23.0701	23.7842	19	19	19	0.00151969	0.0314581	4.22098	+	Intensity WT+Cys-SSH_Intensity WT	1	1	1	1	0	0	0	1	1.6	1.6	1.6	67.741	0.0013918	1.6828	30599000	23	4	1	1	1	0	0	0	579	579	1.6	1.6	1.6	0	0	0	7346800	8806200	14446000	0
60S ribosomal protein L3, putative	EHI_167520	B1N4Y7;C4LW09	B1N4Y7;C4LW09	26.246	25.6819	27.4481	19	19	19	0.00156967	0.0314581	7.45869	+	Intensity WT+Cys-SSH_Intensity WT	6	3	4	5	1	0	0	6	17.1	17.1	17.1	39.719	0	7.9047	316520000	20	17	3	4	5	1	0	0	350	NaN	8	10	14.3	2.9	0	0	79588000	53829000	183110000	0
Adhesin 112 (EhADH112)	EHI_181220	A0A8U0WNY2	A0A8U0WNY2	26.5224	25.7811	26.2993	23.0184	22.759	19	0.00158378	0.0314581	3.31227	+	Intensity WT+Cys-SSH_Intensity WT	6	3	4	5	2	1	0	6	11.8	11.8	11.8	78.127	0	55.936	252230000	42	22	3	4	5	2	1	0	687	687	7.3	7.6	10.6	4.7	2.5	0	96393000	57662000	82583000	8496400
Vacuolar protein sorting 35, putative	EHI_041950	C4M4G0	C4M4G0	27.4463	26.9228	27.5824	23.6078	24.0882	23.5876	0.00160828	0.0314581	3.46914	+	Intensity WT+Cys-SSH_Intensity WT	12	9	6	7	1	2	3	12	16.4	16.4	16.4	85.142	0	94.054	554300000	35	32	9	6	7	1	2	3	746	746	13.8	9.2	12.2	1.7	3.2	4.3	182880000	127220000	200970000	12784000
Importin beta-3 family protein, putative	EHI_098400	C4LXC2	C4LXC2	26.3385	25.8042	26.0471	22.7557	22.0323	21.38	0.00163376	0.0314581	3.66929	+	Intensity WT+Cys-SSH_Intensity WT	13	10	5	7	1	1	1	13	13.2	13.2	13.2	125.55	0	63.178	226890000	62	25	10	5	7	1	1	1	1088	1088	10.3	4.9	8.3	1.4	1.4	1.4	84855000	58594000	69336000	7081900
Rab family GTPase	EHI_117960	A0A8U0WP66	A0A8U0WP66	24.1197	24.1472	25.3067	19	19	19	0.00163474	0.0314581	5.52455	+	Intensity WT+Cys-SSH_Intensity WT	4	1	2	4	0	0	0	4	26.5	20.9	20.9	21.281	0	10.91	78310000	14	9	1	2	4	0	0	0	196	196	13.8	17.3	26.5	5.6	0	0	18229000	18580000	41502000	0
PPi-type phosphoenolpyruvate carboxykinase 2	PEPCK2	C4M1E4	C4M1E4	22.7342	21.919	22.2747	19	19	19	0.00166855	0.0314581	3.30931	+	Intensity WT+Cys-SSH_Intensity WT	2	1	1	1	0	0	0	1	8.4	2.2	0.9	131.12	0	2.3806	16017000	59	3	0	1	0	0	0	0	1153	1153	4.7	2.6	4.3	1	2.5	1.8	6976900	3965400	5074200	0
START domain-containing protein	EHI_161070	C4M2S3	C4M2S3	27.2744	25.4862	26.1458	19	19	19	0.00168254	0.0314581	7.30217	+	Intensity WT+Cys-SSH_Intensity WT	2	2	2	2	0	0	0	2	9	9	9	23.858	0	4.4535	283590000	13	7	2	2	2	0	0	0	211	211	9	9	9	0	0	0	162340000	47003000	74247000	0
26S protease regulatory subunit, putative	EHI_187600	B1N4G1;C4M8D7;B1N5Y7;C4M3C0	B1N4G1;C4M8D7;B1N5Y7;C4M3C0	23.715	23.7687	24.8405	19	19	19	0.0017004	0.0314581	5.10807	+	Intensity WT+Cys-SSH_Intensity WT	1	1	1	1	0	0	0	1	5.6	2.4	2.4	42.406	0.00070522	1.7894	58104000	23	3	1	1	1	0	0	0	375	NaN	5.6	2.4	5.6	3.2	0	0	13770000	14292000	30042000	0
Sulfotransferase, putative	EHI_197340	C4LVF0	C4LVF0	26.0306	24.5206	25.7331	19	19	19	0.00170632	0.0314581	6.42809	+	Intensity WT+Cys-SSH_Intensity WT	5	4	4	4	0	0	0	5	13.7	13.7	13.7	51.883	0	48.395	148390000	24	19	4	4	4	0	0	0	437	437	11.2	11.9	11.2	0	0	0	68547000	24068000	55773000	0
Rab family GTPase	EHI_056100	A0A8U0WNX4	A0A8U0WNX4	22.4349	21.7922	22.5433	19	19	19	0.00171565	0.0314581	3.25678	+	Intensity WT+Cys-SSH_Intensity WT	1	1	1	1	0	0	0	1	8	4.2	4.2	24.251	0.003856	1.2068	15414000	16	3	1	1	1	0	0	0	213	213	8	8	8	0	0	0	5669900	3631600	6112300	0
Ras GTPase-activating protein, putative	EHI_126270	C4LW12	C4LW12	23.1249	22.4793	22.2548	19	19	19	0.00172117	0.0314581	3.61967	+	Intensity WT+Cys-SSH_Intensity WT	1	1	1	1	0	0	0	1	2.3	2.3	2.3	75.93	0	2.6629	19999000	37	3	1	1	1	0	0	0	654	654	2.3	2.3	2.3	0	0	0	9147300	5847300	5004400	0
Receptor protein kinase, putative	EHI_037140	C4M7N9;C4M455	C4M7N9	26.8771	26.4353	26.855	24.7448	24.7192	24.3513	0.00173867	0.0314581	1.99049	+	Intensity WT+Cys-SSH_Intensity WT	8	4	4	7	3	3	3	8	8.9	8.2	8.2	128.94	0	57.087	412510000	55	19	4	4	7	3	3	3	1150	NaN	5.6	3.7	6.9	2.4	2.4	2.4	123260000	90744000	121380000	28114000
Probable acetate kinase	EHI_170010	C4M1C3	C4M1C3	22.3113	21.9713	22.8098	19	19	19	0.00174448	0.0314581	3.36414	+	Intensity WT+Cys-SSH_Intensity WT	1	1	1	1	0	0	0	1	3.1	3.1	3.1	43.247	0.0044614	1.1677	16669000	25	3	1	1	1	0	0	0	392	392	3.1	3.1	3.1	0	0	0	5204500	4111600	7352600	0
Rho-related protein racD	RACD	Q24817	Q24817	24.8039	25.0585	23.741	19	19	19	0.00178175	0.031781	5.53446	+	Intensity WT+Cys-SSH_Intensity WT	2	1	2	1	0	0	0	2	46	10	10	22.334	0	3.2043	78252000	11	6	1	2	1	0	0	0	200	200	42	38.5	34.5	5.5	5.5	5.5	29289000	34944000	14020000	0
Rho-GAP domain-containing protein	EHI_136460	C4M2B5	C4M2B5	24.5255	23.3378	24.3635	19	19	19	0.00180718	0.0318879	5.07558	+	Intensity WT+Cys-SSH_Intensity WT	4	2	2	2	0	0	0	4	5.6	5.6	5.6	87.031	0	2.5253	56335000	46	5	2	2	2	0	0	0	756	756	2.8	2.6	2.9	0	0	0	24149000	10602000	21584000	0
Calcium-regulated actin-bundling protein C-terminal domain-containing protein	EHI_010570	C4LYU4	C4LYU4	27.4758	26.8826	27.2931	24.641	24.2857	23.9408	0.00184549	0.0320248	2.75386	+	Intensity WT+Cys-SSH_Intensity WT	3	3	3	2	2	2	2	3	13.6	13.6	13.6	33.329	0	66.766	537550000	16	42	3	3	2	2	2	2	287	287	13.6	13.6	11.1	11.1	11.1	11.1	186660000	123730000	164450000	26162000
Uncharacterized protein	EHI_175270	C4M3A6	C4M3A6	30.1905	27.9338	28.1022	19	19	19	0.00189853	0.0320248	9.74218	+	Intensity WT+Cys-SSH_Intensity WT	15	15	8	8	0	0	0	15	30.8	30.8	30.8	49.645	0	170.28	1769900000	21	49	15	8	8	0	0	0	428	428	30.8	17.5	15.9	0	0	0	1225299968	256400000	288150016	0
Thioredoxin, putative	EHI_045250	C4LTD8	C4LTD8	22.8806	22.0839	22.913	19	19	19	0.00191929	0.0320248	3.62584	+	Intensity WT+Cys-SSH_Intensity WT	2	2	2	1	0	0	0	2	4.7	4.7	4.7	57.167	0	4.2759	20065000	26	4	2	2	1	0	0	0	485	485	4.7	4.7	2.5	0	0	0	7722300	4445500	7897700	0
Protein kinase, putative	EHI_146320	C4M9B9	C4M9B9	25.0028	23.6117	24.4138	19	19	19	0.0019712	0.0320248	5.34275	+	Intensity WT+Cys-SSH_Intensity WT	1	1	1	1	0	0	0	1	1.3	1.3	1.3	90.519	0.0062775	1.1093	68788000	48	6	1	1	1	0	0	0	784	784	1.3	1.3	1.3	0	0	0	33620000	12818000	22350000	0
Vacuolar ATP synthase subunit E, putative	EHI_182550	C4LV36	C4LV36	26.5965	25.0642	25.1355	19	19	19	0.00198704	0.0320248	6.59874	+	Intensity WT+Cys-SSH_Intensity WT	3	2	2	1	0	0	0	3	11	11	11	25.221	0	3.6037	173410000	14	7	2	2	1	0	0	0	218	218	6.4	7.8	3.2	0	0	0	101470000	35082000	36859000	0
Autophagy-related protein 9; Uncharacterized protein	EHI_072010	C4M606;B1N5R1	C4M606;B1N5R1	25.1407	24.2326	23.751	19	19	19	0.00199777	0.0320248	5.37478	+	Intensity WT+Cys-SSH_Intensity WT	3	3	3	2	0	0	0	3	6.4	6.4	6.4	62.605	0	14.485	70823000	27	10	3	3	2	0	0	0	533	NaN	6.4	6.4	4.1	0	0	0	36993000	19712000	14118000	0
F-actin-capping protein subunit beta	EHI_134490	B1N371;C4M096	B1N371;C4M096	26.8016	24.9854	26.0896	19	19	23.0324	0.00200712	0.0320248	6.95884	+	Intensity WT+Cys-SSH_Intensity WT	3	3	1	3	0	0	1	3	24.1	24.1	24.1	19.368	0	38.442	230170000	10	11	3	1	3	0	0	1	170	NaN	24.1	5.3	24.1	0	0	5.3	116970000	33216000	71408000	0
Ras family GTPase	EHI_154240	C4M588	C4M588	26.7534	25.0492	25.4291	19	19	19	0.00205923	0.0320248	6.7439	+	Intensity WT+Cys-SSH_Intensity WT	5	5	4	3	0	0	0	5	29.9	29.9	29.9	22.042	0	30.897	193030000	9	17	5	4	3	0	0	0	197	197	29.9	25.9	22.3	0	0	0	113130000	34719000	45177000	0
Glycerophosphoryl diester phosphodiesterase, putative	EHI_068320	C4LU25	C4LU25	27.5071	25.5272	26.3914	19	19	19	0.00206495	0.0320248	7.47523	+	Intensity WT+Cys-SSH_Intensity WT	8	8	3	5	0	0	0	8	18.7	18.7	18.7	45.244	0	20.502	327130000	20	23	8	3	5	0	0	0	396	396	18.7	8.3	13.4	0	0	0	190750000	48357000	88022000	0
dolichyl-diphosphooligosaccharide--protein glycotransferase	EHI_011940	C4LTI8;B1N615;C4M1K7	C4LTI8	27.6063	25.8873	25.8918	19	19	19	0.0020672	0.0320248	7.4618	+	Intensity WT+Cys-SSH_Intensity WT	7	7	3	2	0	0	0	7	11.7	11.7	11.7	82.92	0	23.775	328660000	31	16	7	3	2	0	0	0	721	NaN	11.7	3.9	2.9	0	0	0	204330000	62066000	62259000	0
Pyrophosphate--fructose 6-phosphate 1-phosphotransferase	EHI_000730	C4LZC2	C4LZC2	27.6847	26.2213	25.7618	19	19	19	0.00207019	0.0320248	7.55595	+	Intensity WT+Cys-SSH_Intensity WT	8	7	5	6	0	1	0	8	14.7	14.7	14.7	60.16	0	48.728	350870000	27	22	7	5	6	0	1	0	546	546	14.3	9.3	11.2	0	1.5	0	215740000	78237000	56894000	0
Coronin	EHI_122800	C4M5M6	C4M5M6	28.0897	26.0017	26.7374	19	19	19	0.00209	0.0320248	7.94292	+	Intensity WT+Cys-SSH_Intensity WT	13	13	7	8	0	0	0	13	9.2	9.2	9.2	186.88	0	104.29	464720000	98	52	13	7	8	0	0	0	1602	1602	9.2	5.5	6	0	0	0	285649984	67188000	111880000	0
AIG1 family protein, putative	EHI_126550	C4MAT2	C4MAT2	26.4963	25.65	26.0184	22.9048	22.8493	22.4492	0.00211218	0.0320248	3.17785	+	Intensity WT+Cys-SSH_Intensity WT	3	3	3	3	1	1	1	3	19.6	19.6	19.6	21.328	0	13.116	236420000	9	19	3	3	3	1	1	1	189	189	19.6	19.6	19.6	4.8	4.8	4.8	94663000	52652000	67972000	7853100
TBC domain containing protein	EHI_009510	C4LZ27	C4LZ27	26.7857	25.6688	24.9754	19	19	19	0.0021263	0.0320248	6.80997	+	Intensity WT+Cys-SSH_Intensity WT	5	5	4	3	0	0	0	5	19.6	19.6	19.6	36.303	0	23.832	202020000	17	23	5	4	3	0	0	0	312	312	19.6	16.3	13.1	0	0	0	115690000	53343000	32988000	0
Long-chain-fatty-acid--CoA ligase, putative	EHI_025090	C4MB19	C4MB19	29.717	27.1839	28.4048	19	19	19	0.00213319	0.0320248	9.43522	+	Intensity WT+Cys-SSH_Intensity WT	15	14	9	9	0	0	0	14	21.7	21.7	20.5	78.691	0	122.63	1390300000	32	50	13	9	9	0	0	0	683	683	21.5	14.9	15.2	0	0	0	882480000	152460000	355390016	0
WH2 domain-containing protein	EHI_016130	C4MAN6	C4MAN6	27.2789	25.7495	25.4927	19	19	19	0.00214943	0.0320248	7.1737	+	Intensity WT+Cys-SSH_Intensity WT	7	6	5	3	0	0	0	7	11.8	11.8	11.8	55.93	0	10.585	266470000	26	19	6	5	3	0	0	0	510	510	10.4	8.4	6.3	0	0	0	162840000	56414000	47213000	0
Peptidase S74 domain-containing protein	EHI_187050	C4LVS2	C4LVS2	26.3088	25.192	24.619	19	19	19	0.00215985	0.0320248	6.37328	+	Intensity WT+Cys-SSH_Intensity WT	4	4	4	3	0	0	0	4	8.8	8.8	8.8	56.131	0	43.329	147220000	21	12	4	4	3	0	0	0	489	489	8.8	8.8	7.4	0	0	0	83127000	38331000	25767000	0
Long-chain-fatty-acid--CoA ligase, putative	EHI_127830	C4M520	C4M520	29.9211	28.153	27.4281	19	19	19	0.00216621	0.0320248	9.50075	+	Intensity WT+Cys-SSH_Intensity WT	11	9	8	5	0	1	1	10	18.5	17.3	16.3	77.268	0	38.506	1495600000	34	28	9	7	5	0	0	0	688	688	14.5	11.5	7.8	0	1	1	1016600000	298470016	180590000	0
GDP-Man:Man(3)GlcNAc(2)-PP-Dol alpha-1,2-mannosyltransferase	EHI_093950	C4LYI6	C4LYI6	26.4145	24.7015	25.2279	19	19	19	0.00221887	0.0323037	6.44799	+	Intensity WT+Cys-SSH_Intensity WT	3	3	3	2	0	0	0	3	8.3	8.3	8.3	50.846	0	4.7051	156030000	22	7	3	3	2	0	0	0	445	445	8.3	8.3	4.7	0	0	0	89448000	27283000	39297000	0
SMP-LTD domain-containing protein	EHI_179880	C4M639	C4M639	25.1041	23.6343	24.4096	19	19	19	0.00224336	0.0323037	5.38267	+	Intensity WT+Cys-SSH_Intensity WT	2	1	1	2	0	0	0	2	3.5	3.5	3.5	72.559	0.00072464	1.947	71371000	33	9	1	1	2	0	0	0	632	632	1.9	1.9	3.5	0	0	0	36065000	13021000	22285000	0
Thioredoxin, putative	EHI_062790	C4M1Q5	C4M1Q5	22.8621	22.3406	23.397	19	19	19	0.00224413	0.0323037	3.86659	+	Intensity WT+Cys-SSH_Intensity WT	1	1	1	1	0	0	0	1	14.2	14.2	14.2	12.195	0	8.5377	23981000	5	3	1	1	1	0	0	0	106	106	14.2	14.2	14.2	0	0	0	7624100	5311200	11046000	0
Uncharacterized protein	EHI_000570	C4LZA8	C4LZA8	23.9279	22.7838	23.7562	19	19	19	0.0022838	0.0325889	4.4893	+	Intensity WT+Cys-SSH_Intensity WT	1	1	1	1	0	0	0	1	3.8	3.8	3.8	27.53	0	3.5081	37350000	9	3	1	1	1	0	0	0	237	237	3.8	3.8	3.8	0	0	0	15959000	7221200	14169000	0
Dolichyl-diphosphooligosaccharide--protein glycosyltransferase subunit 1	EHI_029540	C4M7V5	C4M7V5	28.11	26.9672	26.9949	22.5416	22.6773	22.2221	0.00231423	0.0327384	4.74793	+	Intensity WT+Cys-SSH_Intensity WT	7	6	6	4	1	1	1	7	15.8	15.8	15.8	47.995	0	15.819	572340000	19	28	6	6	4	1	1	1	423	423	13.9	13	8.5	1.9	1.9	1.9	289700000	131200000	133740000	6105000
Ras GTPase activating protein, putative	EHI_035800	C4LY07	C4LY07	25.2991	24.9475	25.0291	22.6434	23.134	22.0273	0.00237004	0.0328602	2.20324	+	Intensity WT+Cys-SSH_Intensity WT	8	3	4	5	2	2	1	8	14.7	14.7	14.7	90.364	0	38.924	127910000	39	25	3	4	5	2	2	1	787	787	5.8	5.8	9.1	3	3	1.4	41285000	32355000	34239000	6551400
1-acyl-glycerol-3-phosphate acyltransferase, putative	EHI_155730	C4LWC2	C4LWC2	26.9522	25.2524	25.3525	19	19	19	0.00237031	0.0328602	6.85235	+	Intensity WT+Cys-SSH_Intensity WT	4	4	2	1	0	0	0	4	11.5	11.5	11.5	38.687	0	12.287	212650000	15	10	4	2	1	0	0	0	323	323	11.5	5.6	2.8	0	0	0	129840000	39969000	42842000	0
Importin N-terminal domain-containing protein	EHI_171760	C4MAH1;C4M2R0;C4M0H8	C4MAH1	25.986	25.5094	26.5931	22.1508	21.8811	19	0.00238291	0.0328602	4.01352	+	Intensity WT+Cys-SSH_Intensity WT	6	5	5	6	1	1	0	6	8.8	8.8	8.8	92.9	0	41.857	223970000	39	29	5	5	6	1	1	0	827	NaN	7.9	7	8.8	1.8	1.8	0	66459000	47762000	101230000	4656500
Thioredoxin	EHI_182480	C4LVA3	C4LVA3	25.4214	23.8645	24.4901	19	19	19	0.00241581	0.0329469	5.592	+	Intensity WT+Cys-SSH_Intensity WT	2	2	1	2	0	0	0	2	5.3	5.3	5.3	61.541	0	12.522	83773000	21	10	2	1	2	0	0	0	531	531	5.3	2.4	5.3	0	0	0	44936000	15273000	23565000	0
Rab family GTPase	EHI_146510	C4MA07	C4MA07	28.4686	27.4818	28.1273	24.3369	24.4905	23.5748	0.00242936	0.0329469	3.6122	+	Intensity WT+Cys-SSH_Intensity WT	3	3	3	2	1	2	2	3	20.1	16.1	16.1	22.353	0	5.9864	909330000	12	20	3	3	2	1	2	2	199	199	20.1	20.1	14.1	4.5	10.1	10.1	371460000	187430000	293190016	21190000
60S ribosomal protein L23, putative	EHI_051710	C4LVB0	C4LVB0	26.7414	25.8812	26.5585	20.6195	19	19	0.00245838	0.0330672	6.58394	+	Intensity WT+Cys-SSH_Intensity WT	2	2	2	2	1	0	0	2	20	20	20	15.233	0	28.128	274440000	8	13	2	2	2	1	0	0	140	140	20	20	20	14.3	0	0	112190000	61806000	98834000	1611000
BRCT domain-containing protein	EHI_104430	C4LZ54	C4LZ54	23.6583	22.5258	22.8998	19	19	19	0.00257864	0.0341947	4.02794	+	Intensity WT+Cys-SSH_Intensity WT	2	2	1	1	0	0	0	2	2.8	2.8	2.8	72.632	0	2.8174	27103000	43	5	2	1	1	0	0	0	637	637	2.8	1.3	1.6	0	0	0	13239000	6038500	7825600	0
ADF-H domain-containing protein	EHI_118750	C4LYM3	C4LYM3	26.3731	24.6582	24.9858	19	19	19	0.00259723	0.0341947	6.33901	+	Intensity WT+Cys-SSH_Intensity WT	1	1	1	1	0	0	0	1	8.1	8.1	8.1	15.159	0	3.9944	146610000	8	4	1	1	1	0	0	0	135	135	8.1	8.1	8.1	0	0	0	86912000	26476000	33226000	0
Fibrillarin, putative	EHI_118840	C4LYN2	C4LYN2	24.1174	23.8995	25.354	19	19	19	0.00260471	0.0341947	5.45693	+	Intensity WT+Cys-SSH_Intensity WT	2	2	1	2	0	0	0	2	11.5	11.5	11.5	32.486	0	5.955	76733000	16	10	2	1	2	0	0	0	305	305	11.5	3.9	11.5	0	0	0	18199000	15648000	42885000	0
Aminoalcoholphosphotransferase, putative; Diacylglycerol cholinephosphotransferase, putative	EHI_080720	C4M9P0;B1N5V9	C4M9P0;B1N5V9	26.9917	26.1302	24.9649	19	19	19	0.00265608	0.0345923	7.02893	+	Intensity WT+Cys-SSH_Intensity WT	5	4	4	4	0	0	0	5	12.7	12.7	12.7	43.281	0	22.46	239650000	6	17	4	4	4	0	0	0	377	NaN	12.7	11.7	9.8	0	0	0	133450000	73448000	32747000	0
Uncharacterized protein	EHI_005920	C4M2M7	C4M2M7	25.1345	23.7282	23.8807	19	19	19	0.00278276	0.0354985	5.2478	+	Intensity WT+Cys-SSH_Intensity WT	1	1	1	1	0	0	0	1	8.6	8.6	8.6	20.226	0.001345	1.4494	66175000	9	3	1	1	1	0	0	0	175	175	8.6	8.6	8.6	0	0	0	36833000	13896000	15446000	0
Rab family GTPase	EHI_199820	A0A8U0WPS5	A0A8U0WPS5	29.4306	28.6385	29.2797	25.809	25.1473	24.5539	0.00278489	0.0354985	3.63813	+	Intensity WT+Cys-SSH_Intensity WT	11	10	7	9	3	3	2	11	48.7	48.7	48.7	22.272	0	101.16	1913800000	12	59	10	7	9	3	3	2	199	199	44.7	35.2	46.2	15.6	15.6	11.6	723609984	417870016	651740032	58786000
Leucine-rich repeat containing protein	EHI_119950	C4M989	C4M989	24.0975	22.8779	24.0525	19	19	19	0.00282942	0.0354985	4.67595	+	Intensity WT+Cys-SSH_Intensity WT	1	1	1	1	0	0	0	1	3.1	3.1	3.1	40.518	0	6.3573	43057000	21	4	1	1	1	0	0	0	351	351	3.1	3.1	3.1	0	0	0	17950000	7707700	17399000	0
Small GTPase Rab11B	EHI_107250	A0A8U0WPZ4	A0A8U0WPZ4	29.3799	27.9096	28.4872	23.5529	23.0466	21.246	0.00283024	0.0354985	5.29252	+	Intensity WT+Cys-SSH_Intensity WT	11	10	9	9	2	2	1	8	57.3	57.3	43.6	23.786	0	108.24	1350400000	17	56	8	7	6	2	2	1	211	211	52.6	46.4	50.7	9.5	9	5.2	698590016	252140000	376260000	12306000
40S ribosomal protein S12	EHI_111760	C4M574	C4M574	28.5433	26.1778	26.888	19	19	19	0.00283382	0.0354985	8.20304	+	Intensity WT+Cys-SSH_Intensity WT	9	8	6	5	0	0	0	2	56.8	56.8	15.9	14.81	0	96.424	591290000	8	25	2	2	1	0	0	0	132	132	56.8	43.2	41.7	0	0	0	391190016	75913000	124190000	0
Protein tyrosine kinase domain-containing protein	EHI_189290	C4M4M4	C4M4M4	26.4495	24.7083	24.9273	19	19	19	0.00289646	0.0360083	6.36169	+	Intensity WT+Cys-SSH_Intensity WT	1	1	1	1	0	0	0	1	1.3	0.7	0.7	137	0	3.2449	150960000	62	4	1	1	1	0	0	0	1215	1215	1.3	1.3	1.3	0	0	0	91642000	27411000	31906000	0
Small ribosomal subunit protein uS13; 40S ribosomal protein S18, putative	RPS18	P48151;C4M367	P48151;C4M367	27.2854	26.2064	27.5736	19	20.6122	19	0.00294026	0.0362779	7.21573	+	Intensity WT+Cys-SSH_Intensity WT	7	4	6	6	0	1	0	7	47.7	47.7	47.7	17.662	0	66.997	442360000	10	31	4	6	6	0	1	0	155	NaN	27.1	43.2	40	0	7.7	0	163580000	77431000	199750000	0
40S ribosomal protein S12, putative	EHI_153330	C4LSC4	C4LSC4	26.372	25.0413	24.5278	19	19	19	0.00299157	0.0363978	6.31369	+	Intensity WT+Cys-SSH_Intensity WT	1	1	1	1	0	0	0	1	13.2	5.1	5.1	15.157	0.0074627	1.0756	145560000	7	5	1	1	1	0	0	0	136	136	13.2	13.2	13.2	0	0	0	86846000	34528000	24189000	0
Rho family GTPase	EHI_180430	C4M292	C4M292	25.7414	24.4647	24.0813	19	19	19	0.00299657	0.0363978	5.76246	+	Intensity WT+Cys-SSH_Intensity WT	4	4	3	2	0	0	0	3	22.7	22.7	17	21.644	0	5.0275	96999000	9	10	3	2	1	0	0	0	194	194	22.7	17	12.4	0	0	0	56095000	23153000	17750000	0
S phingosine-1-phosphate lyase 1, putative	EHI_039350	C4M8C7;B1N3J5	C4M8C7	27.6494	25.382	26.4439	19	19	19	0.00303099	0.0363978	7.49177	+	Intensity WT+Cys-SSH_Intensity WT	10	8	2	4	0	0	0	10	23.5	23.5	23.5	57.666	0	14.529	345530000	28	16	8	2	4	0	0	0	514	NaN	21.8	3.5	8.2	0	0	0	210520000	43727000	91287000	0
Rab family GTPase	EHI_081330	A0A8U0WPE3	A0A8U0WPE3	25.2425	24.1887	26.0514	19	19	19	0.00304155	0.0363978	6.16087	+	Intensity WT+Cys-SSH_Intensity WT	5	3	1	4	0	0	0	4	28.5	28.5	23.7	23.141	0	11.509	128360000	15	13	2	1	4	0	0	0	207	207	19.3	3.9	23.7	0	0	0	39695000	19122000	69544000	0
Rab family GTPase	EHI_128180	C4M535;A0A8U0WPV5	C4M535;A0A8U0WPV5	23.4756	22.318	22.746	19	19	19	0.00307428	0.0363978	3.84652	+	Intensity WT+Cys-SSH_Intensity WT	2	1	1	1	0	0	0	2	13	13	13	23.937	0	4.9151	23927000	12	4	1	1	1	0	0	0	208	NaN	7.7	5.3	7.7	0	0	0	11664000	5228500	7034600	0
40S ribosomal protein S3, putative	EHI_146340	C4LT02	C4LT02	29.9037	29.6387	30.3035	27.7742	27.747	27.1573	0.00312766	0.0363978	2.18803	+	Intensity WT+Cys-SSH_Intensity WT	15	11	12	14	5	5	5	15	38.1	38.1	38.1	26.934	0	50.094	3769800000	18	95	11	12	14	5	5	5	244	244	38.1	37.7	38.1	18	18	18	1004400000	835880000	1325100032	229550000
Long-chain-fatty-acid--CoA ligase, putative	EHI_079300	C4M7S1	C4M7S1	27.5368	25.4817	25.7696	19	19	19	0.00313655	0.0363978	7.26271	+	Intensity WT+Cys-SSH_Intensity WT	6	6	4	4	0	0	0	6	11.7	11.7	11.7	75.425	0	64.774	298780000	31	22	6	4	4	0	0	0	658	658	11.7	7.4	7.4	0	0	0	194720000	46855000	57204000	0
Serine aminopeptidase S33 domain-containing protein	EHI_006710	C4M0E4	C4M0E4	26.7199	24.9445	25.0133	19	19	19	0.00314318	0.0363978	6.55925	+	Intensity WT+Cys-SSH_Intensity WT	3	3	1	2	0	0	0	3	11.9	11.9	11.9	51.115	0	16.77	176690000	17	12	3	1	2	0	0	0	447	447	11.9	2.5	7.6	0	0	0	110530000	32289000	33866000	0
Coatomer subunit gamma	EHI_040700	A0A8U0WPW7	A0A8U0WPW7	27.199	26.5948	27.7277	23.4796	23.1108	22.4784	0.00316545	0.0363978	3.87862	+	Intensity WT+Cys-SSH_Intensity WT	15	10	10	12	2	2	2	15	17.9	17.9	17.9	95.402	0	24.088	504300000	50	39	10	10	12	2	2	2	844	844	13.2	12.2	15.3	2.4	2.4	2.4	154070000	101350000	222270000	11697000
Variant sh3 domain containing protein	EHI_110690	C4LUB6	C4LUB6	26.2978	24.7421	26.7914	19	19	19	0.0031854	0.0363978	6.94375	+	Intensity WT+Cys-SSH_Intensity WT	6	3	2	6	0	0	0	6	22.7	22.7	22.7	42.079	0	113.21	226700000	21	16	3	2	6	0	0	0	366	366	10.7	7.4	22.7	0	0	0	82494000	28061000	116150000	0
Rab-GAP TBC domain-containing protein	EHI_069150	B1N2T7	B1N2T7	23.8333	22.5996	23.6884	19	19	19	0.00319395	0.0363978	4.37375	+	Intensity WT+Cys-SSH_Intensity WT	1	1	1	1	0	0	0	1	3.6	3.6	3.6	38.86	0.00072411	1.9449	34820000	11	3	1	1	1	0	0	0	331	331	3.6	3.6	3.6	0	0	0	14946000	6355700	13518000	0
Transmembrane protein	EHI_139040	C4M4J4	C4M4J4	25.9279	26.0956	26.1558	25.047	24.7823	23.6954	0.00323823	0.0366478	1.1451	+	Intensity WT+Cys-SSH_Intensity WT	3	2	3	3	2	2	2	3	5.7	5.7	5.7	56.113	0	18.99	287410000	18	31	2	3	3	2	2	2	492	492	4.1	5.7	5.7	4.1	4.1	4.1	63838000	71704000	74764000	34666000
Vacuolar protein sorting-associated protein 45, putative; Sec1 family protein	EHI_154290	B1N3T5;A0A8U0WPJ0	B1N3T5;A0A8U0WPJ0	24.3776	23.1882	23.0915	19	19	19	0.00338721	0.0379137	4.55245	+	Intensity WT+Cys-SSH_Intensity WT	2	1	1	1	0	0	0	2	3.6	3.6	3.6	60.432	0.0013899	1.6745	40292000	26	2	1	1	1	0	0	0	529	NaN	1.5	2.1	2.1	0	0	0	21796000	9557800	8938100	0
Aspartate--ammonia ligase, putative	EHI_148470	C4LT17	C4LT17	25.9827	24.1254	24.7842	19	19	19	0.00342247	0.0379137	5.96413	+	Intensity WT+Cys-SSH_Intensity WT	4	4	2	3	0	0	0	4	16.5	16.5	16.5	40.043	0	33.789	113500000	20	10	4	2	3	0	0	0	345	345	16.5	7.2	13	0	0	0	66311000	18301000	28893000	0
Nucleolar complex protein 2 homolog, putative	EHI_105790	C4M9H6	C4M9H6	26.0324	24.8609	24.1474	19	19	19	0.00344633	0.0379137	6.01358	+	Intensity WT+Cys-SSH_Intensity WT	7	7	5	3	0	0	0	7	14.4	14.4	14.4	58.306	0	22.259	117690000	30	15	7	5	3	0	0	0	508	508	14.4	10.6	7.5	0	0	0	68633000	30471000	18582000	0
DAGKc domain-containing protein	EHI_023410	C4LUQ1	C4LUQ1	27.8772	26.0487	25.6371	19	19	19	0.00346421	0.0379137	7.52102	+	Intensity WT+Cys-SSH_Intensity WT	10	7	6	4	0	0	0	10	30	30	30	48.705	0	80.668	368140000	19	23	7	6	4	0	0	0	426	426	23.5	17.1	13.1	0	0	0	246540000	69414000	52184000	0
90 kDa heat shock protein, putative	EHI_163480	C4M3S9	C4M3S9	31.6192	30.6	30.7678	27.3643	26.7618	25.9268	0.00347245	0.0379137	3.93263	+	Intensity WT+Cys-SSH_Intensity WT	27	25	19	21	9	8	4	27	37.8	37.8	37.8	81.2	0	258.59	7104700000	45	155	25	19	21	9	8	4	711	711	34.3	26.2	24.1	13.4	11.8	6.2	3298599936	1627500032	1828199936	172770000
GOLD domain-containing protein	EHI_023070	A0A8U0WPA9	A0A8U0WPA9	29.7626	29.1991	29.4794	26.2132	26.9447	26.3343	0.00350153	0.0379137	2.9014	+	Intensity WT+Cys-SSH_Intensity WT	6	5	6	4	2	3	2	6	32.9	32.9	32.9	25.317	0	135.98	2567200000	11	56	5	6	4	2	3	2	216	216	24.1	32.9	17.6	6.9	15.3	6.9	910809984	616300032	748470016	77795000
Rab family GTPase	EHI_108610	A0A8U0WPG2	A0A8U0WPG2	32.252	30.7641	31.4609	26.7596	26.8641	26.6319	0.00352135	0.0379137	4.68047	+	Intensity WT+Cys-SSH_Intensity WT	15	15	12	14	4	4	6	14	71.2	71.2	67.3	22.896	0	323.31	10234000000	14	147	14	11	13	4	4	6	205	205	71.2	60	62	17.1	17.1	25.9	5114699776	1823600000	2955699968	113620000
Thioredoxin, putative	EHI_027550	C4M1U3	C4M1U3	26.0417	24.1125	24.9939	19	19	19	0.00353492	0.0379137	6.0494	+	Intensity WT+Cys-SSH_Intensity WT	5	5	1	2	0	0	0	5	19.3	19.3	19.3	35.196	0	13.983	120630000	16	9	5	1	2	0	0	0	300	300	19.3	2.7	6	0	0	0	69078000	18138000	33414000	0
Glycogen debranching enzyme, putative	EHI_098360	C4LXB9	C4LXB9	23.6445	22.3721	22.928	19	19	19	0.003571	0.0380228	3.98152	+	Intensity WT+Cys-SSH_Intensity WT	3	2	1	1	0	0	0	3	2.2	2.2	2.2	165.55	0	9.9844	26521000	75	4	2	1	1	0	0	0	1428	1428	1.7	0.5	0.8	0	0	0	13113000	5428400	7980100	0
Dolichol-phosphate mannosyltransferase subunit 1	EHI_054260	C4M6U0	C4M6U0	26.8954	24.7254	25.6948	19	19	19	0.00359143	0.0380228	6.77184	+	Intensity WT+Cys-SSH_Intensity WT	4	3	3	3	1	0	1	4	16.4	16.4	16.4	38.873	0	102.77	206880000	13	16	3	3	3	1	0	1	353	353	13.6	10.8	13.6	3.4	0	3.4	124830000	27738000	54312000	0
Right handed beta helix domain-containing protein	EHI_153290	C4LSC0	C4LSC0	26.6468	24.5308	25.9866	19	19	19	0.00362676	0.0380509	6.7214	+	Intensity WT+Cys-SSH_Intensity WT	3	3	2	2	0	0	0	3	6.3	6.3	6.3	46.64	0	5.9634	195800000	25	7	3	2	2	0	0	0	443	443	6.3	4.1	4.7	0	0	0	105070000	24239000	66488000	0
Thioredoxin, putative	EHI_023060	C4LUL8;C4LU31	C4LUL8;C4LU31	23.9032	23.0397	24.6041	19	19	19	0.00366184	0.0380509	4.84898	+	Intensity WT+Cys-SSH_Intensity WT	1	1	1	1	0	0	0	1	4.9	4.9	4.9	28.846	0	4.6649	49813000	11	0	1	1	1	0	0	0	244	NaN	4.9	4.9	4.9	0	0	0	15688000	8622500	25502000	0
AB hydrolase-1 domain-containing protein	EHI_030780	C4M1E7	C4M1E7	24.2207	22.8858	23.1206	19	19	19	0.00366364	0.0380509	4.40902	+	Intensity WT+Cys-SSH_Intensity WT	1	1	1	1	0	0	0	1	1.9	1.9	1.9	49.261	0.0038511	1.2007	36420000	16	3	1	1	1	0	0	0	430	430	1.9	1.9	1.9	0	0	0	19550000	7750200	9119900	0
40S ribosomal protein S11, putative	EHI_124850	C4M979;C4LW92	C4M979;C4LW92	24.1688	23.4478	25.1588	19	19	19	0.00377807	0.0382004	5.25847	+	Intensity WT+Cys-SSH_Intensity WT	1	1	1	1	0	0	0	1	6.4	6.4	6.4	18.208	0	2.9671	67759000	9	4	1	1	1	0	0	0	156	NaN	6.4	6.4	6.4	0	0	0	18859000	11442000	37459000	0
Rho family GTPase	EHI_126310	C4LW15	C4LW15	27.776	25.735	25.6396	19	19	19	0.00378458	0.0382004	7.38351	+	Intensity WT+Cys-SSH_Intensity WT	6	6	4	2	0	0	0	6	35.4	35.4	35.4	24.437	0	36.72	337950000	12	14	6	4	2	0	0	0	212	212	35.4	22.2	10.8	0	0	0	229830000	55846000	52274000	0
Importin beta-3 family protein, putative	EHI_081250	C4M5B0	C4M5B0	22.9403	21.8619	22.2354	19	19	19	0.00379909	0.0382004	3.34589	+	Intensity WT+Cys-SSH_Intensity WT	1	1	1	1	0	0	0	1	1	1	1	122.96	0.00074963	2.1735	16798000	45	3	1	1	1	0	0	0	1071	1071	1	1	1	0	0	0	8048700	3811500	4937700	0
Coatomer subunit beta; Coatomer subunit beta, putative	EHI_088220	A0A8U0WPB4;B1N3Z7;B1N3Z8;REV__C4LYI0	A0A8U0WPB4;B1N3Z7	28.0466	26.2289	25.6443	19	19	19	0.00381986	0.0382004	7.63994	+	Intensity WT+Cys-SSH_Intensity WT	9	8	8	5	0	0	0	9	9.2	9.2	9.2	103.54	0	33.274	408340000	45	24	8	8	5	0	0	0	910	NaN	8.5	9.1	6	0	0	0	277249984	78646000	52446000	0
Uncharacterized protein	EHI_021250	C4M040	C4M040	22.1047	21.5449	22.5486	19	19	19	0.00382443	0.0382004	3.06606	+	Intensity WT+Cys-SSH_Intensity WT	1	1	1	1	0	0	0	1	1.8	1.8	1.8	65.344	0.00070822	1.8132	13704000	25	1	1	1	1	0	0	0	563	563	1.8	1.8	1.8	0	0	0	4510100	3059500	6134800	0
Elongation factor-2 kinase, putative	EHI_090240	C4M8H2	C4M8H2	21.7807	21.783	22.6562	19	19	19	0.00383835	0.0382004	3.07329	+	Intensity WT+Cys-SSH_Intensity WT	1	1	1	1	0	0	0	1	2.5	2.5	2.5	46.084	0.0026316	1.3345	13821000	17	3	1	1	1	0	0	0	402	402	2.5	2.5	2.5	0	0	0	3602900	3608500	6609800	0
HEAT repeat-containing protein 1	EHI_198890	C4LWT5	C4LWT5	24.7645	23.2416	24.6949	19	19	19	0.00384099	0.0382004	5.23367	+	Intensity WT+Cys-SSH_Intensity WT	5	3	2	4	0	0	0	5	2.5	2.5	2.5	229.43	0	6.8451	65577000	94	8	3	2	4	0	0	0	2005	2005	1.4	1.1	2.1	0	0	0	28501000	9918000	27158000	0
3 exoribonuclease family protein	EHI_126330	C4LW17	C4LW17	23.4282	22.6549	24.1109	19	19	19	0.00393324	0.0382229	4.39798	+	Intensity WT+Cys-SSH_Intensity WT	2	1	1	2	0	0	0	2	9.7	9.7	9.7	25.156	0	2.4266	36008000	9	4	1	1	2	0	0	0	227	227	6.2	3.5	9.7	0	0	0	11287000	6603800	18118000	0
Vesicle-fusing ATPase	EHI_004640	C4LYS4	C4LYS4	27.2743	26.8067	27.3894	24.2594	24.863	23.8195	0.00397856	0.0382229	2.59561	+	Intensity WT+Cys-SSH_Intensity WT	11	6	7	9	2	4	3	10	17.4	17.4	15.8	82.692	0	48.365	520930000	48	38	5	6	8	2	4	3	736	736	9.5	10.6	14.1	2.6	5.8	5.2	162320000	117390000	175810000	20082000
Long-chain-fatty-acid--CoA ligase, putative	EHI_156320	C4M4D2	C4M4D2	27.0904	24.8888	25.4998	19	19	19	0.00399211	0.0382229	6.82635	+	Intensity WT+Cys-SSH_Intensity WT	5	5	3	3	0	0	0	5	9.5	8.5	8.5	77.081	0	20.734	221410000	31	15	5	3	3	0	0	0	683	683	8.5	5.3	4.2	0	1	1	142900000	31065000	47448000	0
aspartate--tRNA ligase	EHI_175050	C4LZN0	C4LZN0	28.1472	26.9538	27.6926	24.0008	23.9666	23.0482	0.00400733	0.0382229	3.61421	+	Intensity WT+Cys-SSH_Intensity WT	11	9	9	9	2	2	2	11	23.2	23.2	23.2	62.593	0	151.65	686040000	32	65	9	9	9	2	2	2	544	544	18	19.5	19.7	6.1	6.1	4	297270016	129990000	216920000	16786000
Spatacsin C-terminal domain-containing protein	EHI_074150	C4M304	C4M304	26.5119	24.5612	24.849	19	19	19	0.00402392	0.0382229	6.30734	+	Intensity WT+Cys-SSH_Intensity WT	7	6	4	3	0	0	0	7	3.6	3.6	3.6	221.49	0	12.031	150660000	114	13	6	4	3	0	0	0	1886	1886	3.1	2.1	1.6	0	0	0	95690000	24754000	30220000	0
ER membrane protein complex subunit 3	EHI_148060	C4LSX6	C4LSX6	27.8055	25.9075	25.478	19	19	19	0.00405814	0.0382229	7.39699	+	Intensity WT+Cys-SSH_Intensity WT	5	5	4	3	0	0	0	5	22.3	22.3	22.3	30.772	0	18.295	344260000	14	23	5	4	3	0	0	0	273	273	22.3	19.8	10.3	0	0	0	234580000	62941000	46734000	0
Dolichyl-diphosphooligosaccharide--protein glycosyltransferase subunit 1	EHI_045470	B1N2H8;C4LYH0	B1N2H8;C4LYH0	24.6763	23.1166	24.4975	19	19	19	0.00406036	0.0382229	5.09679	+	Intensity WT+Cys-SSH_Intensity WT	1	1	1	1	0	0	0	1	2.5	2.5	2.5	42.355	0.00075758	2.2294	59591000	21	4	1	1	1	0	0	0	398	NaN	2.5	2.5	2.5	0	0	0	26810000	9094600	23686000	0
Heat shock protein SSA4, putative	EHI_008600	C4M0M4	C4M0M4	22.5674	21.5397	22.1192	19	19	19	0.00406442	0.0382229	3.07545	+	Intensity WT+Cys-SSH_Intensity WT	1	1	1	1	0	0	0	1	1.3	1.3	1.3	68.821	0.0074534	1.074	13820000	35	3	1	1	1	0	0	0	603	603	1.3	1.3	1.3	0	0	0	6215300	3048600	4555700	0
Importin alpha re-exporter, putative	EHI_111750	C4M573	C4M573	24.1751	24.5608	25.2682	21.2855	21.4027	20.2065	0.00407697	0.0382229	3.32394	+	Intensity WT+Cys-SSH_Intensity WT	4	3	3	3	1	1	1	4	5.7	5.7	5.7	101.28	0	29.736	90637000	50	11	3	3	3	1	1	1	889	889	4.6	4.2	4.2	1.7	1.3	1.7	18942000	24748000	40409000	2556100
Uncharacterized protein	EHI_049950	C4LUJ3	C4LUJ3	29.2652	28.0195	28.624	24.5554	23.6937	23.4565	0.00408929	0.0382229	4.51168	+	Intensity WT+Cys-SSH_Intensity WT	17	14	10	15	2	2	2	17	34.8	34.8	34.8	61.266	0	69.563	1380700000	30	65	14	10	15	2	2	2	543	543	27.1	20.4	29.5	3.7	2.8	3.3	645230016	272080000	413689984	24655000
40S ribosomal protein S23, putative	EHI_020310	C4M5B7	C4M5B7	23.9126	23.3269	25.0094	19	19	19	0.00409947	0.0382229	5.08297	+	Intensity WT+Cys-SSH_Intensity WT	2	1	1	2	0	0	0	2	19.1	19.1	19.1	15.711	0	5.1974	60088000	6	5	1	1	2	0	0	0	141	141	5	5	19.1	0	0	0	15791000	10522000	33774000	0
Serine-threonine-isoleucine rich protein	EHI_098510	C4LXD1	C4LXD1	26.1625	25.9382	26.9891	22.972	23.1306	21.0605	0.00415521	0.0385237	3.31201	+	Intensity WT+Cys-SSH_Intensity WT	11	6	5	8	2	2	1	8	6.7	6.7	4.3	187.93	0	19.608	292210000	87	27	4	5	6	2	2	1	1725	1725	4.2	2.5	4.9	1.2	1.2	0.5	75112000	64295000	133210000	8227400
AIG1 family protein	EHI_176700	B1N537	B1N537	25.6273	23.9639	24.0304	19	19	19	0.00423826	0.0390285	5.54053	+	Intensity WT+Cys-SSH_Intensity WT	3	3	2	1	0	0	0	1	11.7	11.7	5	34.809	0	21.81	85328000	17	9	1	1	1	0	0	0	298	298	11.7	8.1	5	0	0	0	51831000	16363000	17134000	0
t-SNARE coiled-coil homology domain-containing protein	EHI_155680	A0A8U0WQ34	A0A8U0WQ34	25.7631	24.3202	23.9206	19	19	19	0.00431243	0.0390285	5.66796	+	Intensity WT+Cys-SSH_Intensity WT	3	3	3	1	0	0	0	3	38.1	38.1	38.1	14.025	0	233.13	93771000	5	13	3	3	1	0	0	0	126	126	38.1	38.1	17.5	0	0	0	56946000	20946000	15879000	0
Peroxiredoxin	EHI_201250	C4M6Q4	C4M6Q4	26.3691	26.5488	27.2744	23.6595	23.948	24.2298	0.00431269	0.0390285	2.92707	+	Intensity WT+Cys-SSH_Intensity WT	2	2	1	2	1	1	1	1	52.1	6.8	6.8	26.379	0	6.7669	396300000	13	10	1	0	1	0	0	0	234	234	49.1	47	50.9	46.6	43.6	47.9	86676000	98173000	162340000	13250000
T-complex protein 1 subunit epsilon	EHI_155450	C4LW96	C4LW96	23.8478	23.4459	25.1334	19	19	19	0.00434269	0.0390285	5.14238	+	Intensity WT+Cys-SSH_Intensity WT	4	2	2	2	0	0	0	4	8.6	8.6	8.6	58.53	0	3.6219	63331000	25	5	2	2	2	0	0	0	536	536	5	3.7	4.3	0	0	0	15097000	11427000	36806000	0
3-ketoacyl-CoA synthase	EHI_111000	C4M5I2	C4M5I2	29.5242	26.6055	27.3592	19	19	19	0.00435602	0.0390285	8.82965	+	Intensity WT+Cys-SSH_Intensity WT	13	13	6	6	0	0	0	12	28.9	28.9	26.7	56.379	0	195.27	1046400000	26	50	12	5	5	0	0	0	494	494	28.9	13.4	13.8	0	0	0	772099968	102110000	172160000	0
Short chain dehydrogenase family protein	EHI_164760	C4M1W9	C4M1W9	28.3681	25.6403	27.6398	19	19	19	0.00437855	0.0390285	8.21608	+	Intensity WT+Cys-SSH_Intensity WT	7	6	4	5	0	0	0	7	31.2	31.2	31.2	33.212	0	28.257	607880000	16	27	6	4	5	0	0	0	298	298	28.9	15.8	25.2	0	0	0	346449984	52301000	209130000	0
Uncharacterized protein	EHI_163240	C4MBJ8	C4MBJ8	31.9559	30.769	30.7383	25.2617	26.4452	26.0342	0.0043927	0.0390285	5.30094	+	Intensity WT+Cys-SSH_Intensity WT	6	5	4	5	1	1	2	3	28.7	28.7	20	25.851	0	43.132	7987100000	8	66	2	3	2	1	1	1	230	230	23	24.3	23	3.9	3.9	8.3	4165700096	1829799936	1791200000	40228000
Auxin efflux carrier family protein, putative	EHI_111850	C4M583	C4M583	26.8987	25.1144	24.7872	19	19	19	0.00439992	0.0390285	6.60009	+	Intensity WT+Cys-SSH_Intensity WT	5	4	2	1	0	0	0	5	13	13	13	59.718	0	9.2962	190390000	24	7	4	2	1	0	0	0	523	523	10.5	4.2	1.7	0	0	0	125120000	36323000	28952000	0
MIF4G domain-containing protein	EHI_006550	C4M0E0	C4M0E0	26.622	25.9323	26.4741	23.4315	22.51	19	0.00453181	0.0399822	3.37202	+	Intensity WT+Cys-SSH_Intensity WT	7	5	6	7	2	1	0	7	11.5	11.5	11.5	83.264	0	24.41	277810000	44	24	5	6	7	2	1	0	729	729	8	10.2	11.5	3	1.4	0	103280000	64031000	93217000	11313000
Profilin-1	EHI_176140	P49230	P49230	32.6648	32.1352	31.6981	29.2094	29.4315	29.1904	0.00457578	0.0401544	2.84559	+	Intensity WT+Cys-SSH_Intensity WT	8	8	7	7	5	5	5	8	55.4	55.4	55.4	13.237	0	170.52	16967000000	5	178	8	7	7	5	5	5	130	130	55.4	51.5	50	27.7	27.7	27.7	6809099776	4717000192	3483899904	620720000
Actin-related protein 2/3 complex subunit 5	EHI_103440	B1N2Q5	B1N2Q5	24.772	24.8341	25.3338	22.1333	22.769	22.9281	0.00461222	0.0402588	2.52881	+	Intensity WT+Cys-SSH_Intensity WT	3	1	2	1	1	1	1	3	25	25	25	14.846	0	10.454	120580000	11	8	1	2	1	1	1	1	136	136	7.4	17.6	11	11	11	11	28649000	29910000	42289000	4600200
Rho-related protein racC	RACC	Q24816	Q24816	29.4543	28.4261	28.8316	25.3848	25.8874	25.3371	0.00469854	0.0405672	3.26792	+	Intensity WT+Cys-SSH_Intensity WT	6	6	5	6	2	2	2	6	33	27.3	27.3	21.619	0	38.226	1722300000	11	61	6	5	6	2	2	2	194	194	33	30.4	33	14.4	14.4	14.4	735600000	360670016	477710016	43811000
Rab family GTPase	EHI_067850	A0A8U0WPX5	A0A8U0WPX5	29.6657	27.7595	28.8297	22.5869	21.0696	19	0.00470328	0.0405672	6.92341	+	Intensity WT+Cys-SSH_Intensity WT	8	8	6	6	2	1	0	2	35.9	35.9	13.4	25.978	0	134.05	1564500000	17	56	2	2	2	0	0	0	231	231	35.9	31.6	31.6	9.1	4.8	0	851670016	227220000	477110016	6299900
Grainin, putative	EHI_120360	B1N4A1	B1N4A1	28.8351	26.6061	26.1273	19	19	19	0.00472172	0.0405672	8.18952	+	Intensity WT+Cys-SSH_Intensity WT	9	8	6	5	0	0	0	9	47.4	40	40	24.599	0	43.971	654350000	14	26	8	6	5	0	0	0	215	215	47.4	31.6	33	3.7	7.4	7.4	478900000	102150000	73299000	0
Rab family GTPase	EHI_153690	A0A8U0WNZ6	A0A8U0WNZ6	28.0747	25.4134	27.6368	19	19	19	0.0047986	0.0407181	8.04164	+	Intensity WT+Cys-SSH_Intensity WT	6	5	2	6	0	0	0	6	36.8	36.8	36.8	22.429	0	89.486	536090000	13	23	5	2	6	0	0	0	204	204	31.4	16.2	36.8	0	0	0	282710016	44688000	208690000	0
Uncharacterized protein	EHI_178630	C4LUS8	C4LUS8	23.6447	22.2473	23.2212	19	19	19	0.00479888	0.0407181	4.03776	+	Intensity WT+Cys-SSH_Intensity WT	2	2	1	2	0	0	0	2	9.2	9.2	9.2	32.07	0	4.2885	27872000	17	4	2	1	2	0	0	0	282	282	9.2	3.9	9.2	0	0	0	13115000	4978700	9778800	0
Uncharacterized protein	EHI_007020	C4M0H5	C4M0H5	27.8646	25.4712	25.7534	19	19	19	0.00481371	0.0407181	7.36305	+	Intensity WT+Cys-SSH_Intensity WT	6	6	3	2	0	0	0	6	12.3	12.3	12.3	56.9	0	47.36	347470000	21	21	6	3	2	0	0	0	486	486	12.3	7.6	4.9	0	0	0	244390000	46514000	56564000	0
Splicing factor 3B subunit 1, putative; Splicing factor3B subunit 1, putative (Fragment)	EHI_049170	C4MAD8;B1N4W3	C4MAD8;B1N4W3	24.1933	22.8635	24.4831	19	19	19	0.004857	0.0407282	4.84663	+	Intensity WT+Cys-SSH_Intensity WT	3	3	1	2	0	0	0	3	4.3	4.3	4.3	103.39	0	3.6475	50264000	43	6	3	1	2	0	0	0	914	NaN	4.3	1.1	2.8	0	0	0	19182000	7631300	23451000	0
Ras family GTPase	EHI_137700	A0A8U0WNZ9;C4LZJ5	A0A8U0WNZ9;C4LZJ5	27.2149	24.7361	25.9125	19	19	19	0.00486455	0.0407282	6.95449	+	Intensity WT+Cys-SSH_Intensity WT	6	5	2	2	0	0	0	6	30.2	30.2	30.2	22.75	0	11.414	246890000	12	10	5	2	2	0	0	0	205	NaN	26.8	7.8	10.2	0	0	0	155780000	27945000	63158000	0
ER membrane protein complex subunit 1	EHI_096250	C4LWD8	C4LWD8	29.1749	28.4706	28.6941	26.8037	26.68	25.2655	0.0049338	0.0410983	2.03801	+	Intensity WT+Cys-SSH_Intensity WT	19	15	11	12	7	7	3	19	35.9	35.9	35.9	69.817	0	292.77	1677300000	30	102	15	11	12	7	7	3	622	622	32.3	22.2	21.9	14.5	14.5	5.3	606049984	371960000	434300000	117140000
F-box domain containing membrane protein, putative	EHI_096400	C4LWF3	C4LWF3	25.2563	23.8349	23.4984	19	19	19	0.0049642	0.0411426	5.19652	+	Intensity WT+Cys-SSH_Intensity WT	2	2	2	1	0	0	0	2	7.7	7.7	7.7	37.785	0	25.907	66890000	10	6	2	2	1	0	0	0	325	325	7.7	7.7	4.9	0	0	0	40077000	14963000	11850000	0
Rho-related protein racG	RACG	O76321	O76321	32.0796	30.1303	31.1782	25.6324	24.7607	24.1707	0.00500804	0.0412974	5.93285	+	Intensity WT+Cys-SSH_Intensity WT	8	8	7	7	4	3	3	7	47.7	47.7	42.2	21.926	0	200.34	8243200000	8	97	7	6	6	3	2	2	199	199	47.7	37.7	37.7	23.6	19.6	19.6	4538699776	1175200000	2429900032	52014000
GTP-binding protein	EHI_031410	C4M4L8;B1N4P1	C4M4L8;B1N4P1	25.4644	23.4884	24.8758	19	19	19	0.00506908	0.0413827	5.60952	+	Intensity WT+Cys-SSH_Intensity WT	3	3	3	3	0	0	0	3	23.7	23.7	23.7	21.474	0	5.9167	88852000	13	11	3	3	3	0	0	0	190	NaN	23.7	23.7	23.7	0	0	0	46297000	11768000	30786000	0
AIG1 family protein, putative (Fragment); AIG1 family protein (Fragment)	EHI_157260	B1N5P2;C4MBM8;C4MBM6	B1N5P2;C4MBM8;C4MBM6	25.4718	23.4901	24.8861	19	19	19	0.00510261	0.0413827	5.61597	+	Intensity WT+Cys-SSH_Intensity WT	1	1	1	1	0	0	0	1	6.1	6.1	6.1	20.724	0.00074906	2.1724	89322000	13	4	1	1	1	0	0	0	179	NaN	6.1	6.1	6.1	0	0	0	46533000	11782000	31007000	0
Uncharacterized protein	EHI_123280	C4MAL8	C4MAL8	22.9731	21.8891	21.9995	19	19	19	0.00511789	0.0413827	3.28727	+	Intensity WT+Cys-SSH_Intensity WT	2	1	1	1	0	0	0	2	7.6	7.6	7.6	41.091	0	6.2761	16311000	19	3	1	1	1	0	0	0	355	355	2.5	2.5	5.1	0	0	0	8233900	3884100	4192900	0
Short chain dehydrogenase family protein	EHI_179310	C4M9X1	C4M9X1	28.203	25.5156	26.2411	19	19	19	0.00513327	0.0413827	7.65323	+	Intensity WT+Cys-SSH_Intensity WT	5	5	3	3	0	0	0	5	19.3	19.3	19.3	34.792	0	66.735	436280000	16	28	5	3	3	0	0	0	311	311	19.3	12.9	12.9	0	0	0	308990016	47969000	79316000	0
Endoplasmic reticulum transmembrane protein	EHI_195140	C4M417	C4M417	31.2331	30.3061	29.7192	24.4681	25.6761	24.2614	0.00516327	0.0413827	5.34739	+	Intensity WT+Cys-SSH_Intensity WT	9	9	4	7	1	3	2	9	42.8	42.8	42.8	17.666	0	247.72	4832400000	6	63	9	4	7	1	3	2	152	152	42.8	30.9	36.8	7.2	23	18.4	2524100096	1327500032	883830016	23207000
Actin; Actin, putative	EHI_107290;EHI_043640	P11426;B1N621;B1N5D1	P11426;B1N621	32.7281	31.8009	32.8002	29.4139	29.0699	28.2708	0.00517719	0.0413827	3.20115	+	Intensity WT+Cys-SSH_Intensity WT	22	21	17	20	14	12	11	22	52.7	52.7	52.7	42.03	0	323.31	19937000000	21	312	21	17	20	14	12	11	376	NaN	49.7	48.1	49.5	47.1	38.6	35.1	7114299904	3741199872	7478900224	715249984
Ribosomal protein L19	EHI_096850	C4LWJ4;C4LU86	C4LWJ4;C4LU86	23.9235	23.359	25.1965	19	19	22.1167	0.00519491	0.0413827	5.15968	+	Intensity WT+Cys-SSH_Intensity WT	2	1	1	2	1	1	1	2	12.6	12.6	12.6	22.915	0	4.1898	69668000	8	8	1	1	2	1	1	1	198	NaN	4	4	12.6	4	4	4	15911000	10759000	38450000	0
Transmembrane protein	EHI_153160	C4LSA8;B1N2E2	C4LSA8	30.4687	29.3302	29.7495	26.768	26.4863	25.8579	0.0053223	0.0419288	3.22231	+	Intensity WT+Cys-SSH_Intensity WT	15	13	12	14	6	7	5	15	19.1	19.1	19.1	67.86	0	204.82	3332500000	28	140	13	12	14	6	7	5	593	NaN	17.9	16.4	18.2	8.4	8.8	5.4	1485900032	674940032	902569984	114280000
Protein kinase, putative	EHI_050650	C4LTT5	C4LTT5	24.0823	22.5343	23.1142	19	19	19	0.00535011	0.0419288	4.24359	+	Intensity WT+Cys-SSH_Intensity WT	4	3	2	1	0	1	0	4	2.9	2.9	2.9	208.62	0	3.9992	32916000	95	6	3	2	1	0	1	0	1880	1880	2.3	1.3	0.7	0	0.8	0	17762000	6074300	9079500	0
Uncharacterized protein	EHI_103470	C4LVJ1	C4LVJ1	25.7234	23.7293	25.5576	19	19	19	0.00535215	0.0419288	6.00346	+	Intensity WT+Cys-SSH_Intensity WT	5	4	2	3	0	1	0	5	24	24	24	21.716	0	24.967	118700000	10	14	4	2	3	0	1	0	196	196	19.4	14.3	18.9	0	6.6	0	55402000	13907000	49387000	0
Actinin-like protein, putative	EHI_164430	C4M1S5;C4M1S6	C4M1S5;C4M1S6	30.6214	29.3871	30.0823	25.451	23.9114	22.9946	0.0053785	0.0419288	5.34911	+	Intensity WT+Cys-SSH_Intensity WT	15	14	11	11	3	3	4	15	40.6	40.6	40.6	53.886	0	44.161	3560700000	22	79	14	11	11	3	3	4	458	NaN	31.9	31.4	24.2	5.7	5.7	7.9	1651799936	702120000	1136800000	45867000
Leucine rich repeat protein, BspA family	EHI_015120	C4MBQ9	C4MBQ9	25.7702	23.6517	25.0254	19	19	19	0.00539121	0.0419288	5.81578	+	Intensity WT+Cys-SSH_Intensity WT	2	2	1	2	0	0	0	2	12.5	12.5	12.5	38.565	0	14.468	104560000	17	7	2	1	2	0	0	0	335	335	12.5	3	12.5	0	0	0	57228000	13179000	34150000	0
Rab family GTPase	EHI_117890	C4LYX3	C4LYX3	29.8404	27.7769	28.3564	21.335	19	19	0.00549915	0.0421556	8.49041	+	Intensity WT+Cys-SSH_Intensity WT	11	11	8	8	1	0	0	6	66	66	44.3	22.869	0	158.9	1537600000	14	51	6	5	5	0	0	0	203	203	66	46.3	46.3	5.4	0	0	961310016	229980000	343649984	2645300
Transporter, major facilitator family	EHI_067960	C4LTZ2	C4LTZ2	26.7502	25.1458	24.4068	19	19	19	0.00550977	0.0421556	6.43429	+	Intensity WT+Cys-SSH_Intensity WT	4	4	3	3	0	0	0	4	11	11	11	54.597	0	6.3021	172240000	16	11	4	3	3	0	0	0	489	489	11	8.8	8.8	0	0	0	112880000	37123000	22243000	0
Single tm domain protein	EHI_141800	C4LW27	C4LW27	25.7171	24.2011	23.7409	19	19	19	0.00551168	0.0421556	5.55305	+	Intensity WT+Cys-SSH_Intensity WT	2	2	2	2	0	0	0	2	24.3	24.3	24.3	8.1082	0	35.788	88467000	2	6	2	2	2	0	0	0	74	74	24.3	24.3	24.3	0	0	0	55161000	19287000	14019000	0
DNA-directed RNA polymerase II subunit, putative	EHI_131150	C4LXI3	C4LXI3	23.0899	21.8066	22.7049	19	19	19	0.00552314	0.0421556	3.53383	+	Intensity WT+Cys-SSH_Intensity WT	1	1	1	1	0	0	0	1	7.2	7.2	7.2	20.286	0.0013803	1.6119	19433000	13	3	1	1	1	0	0	0	180	180	7.2	7.2	7.2	0	0	0	8928200	3668200	6836900	0
WD domain containing protein	EHI_103410	A0A8U0WQ03	A0A8U0WQ03	29.1492	27.9898	29.2678	24.4147	23.1722	23.2022	0.00564423	0.0426138	5.00878	+	Intensity WT+Cys-SSH_Intensity WT	19	15	12	14	3	2	4	19	19.5	19.5	19.5	111.43	0	198.42	1549700000	48	68	15	12	14	3	2	4	998	998	16.3	12.6	14.3	3	2.9	6.1	595350016	266540000	646360000	22364000
HEAT repeat domain containing protein	EHI_124870	C4M981	C4M981	27.1369	27.0024	27.4795	24.6804	23.6488	23.5804	0.00565347	0.0426138	3.04172	+	Intensity WT+Cys-SSH_Intensity WT	8	5	6	7	4	4	5	8	15.3	15.3	15.3	61.966	0	74.103	521750000	34	41	5	6	7	4	4	5	549	549	10.2	11.8	13.5	8.2	7.7	9.5	147580000	134440000	187140000	26886000
DnaJ domain containing protein	EHI_134630	C4M012	C4M012	28.4192	26.7902	27.4897	23.295	22.9003	19	0.00567604	0.0426138	4.46868	+	Intensity WT+Cys-SSH_Intensity WT	9	9	7	7	1	1	0	7	12.2	12.2	9.5	83.908	0	30.824	681580000	33	31	7	6	6	1	1	0	719	719	12.2	10.7	9.3	1.4	1.4	0	358950016	116050000	188460000	10292000
Coated vesicle membrane protein, putative	EHI_096210	A0A8U0WPR5	A0A8U0WPR5	26.2209	25.2582	26.2001	23.0242	22.8046	21.5914	0.0056878	0.0426138	2.97871	+	Intensity WT+Cys-SSH_Intensity WT	3	2	3	3	1	1	1	3	15.5	15.5	15.5	22.159	0	35.971	214460000	9	19	2	3	3	1	1	1	194	194	11.9	15.5	15.5	7.2	7.2	7.2	78215000	40130000	77095000	8530500
Uncharacterized protein	EHI_103520	C4LVJ6	C4LVJ6	25.2571	23.263	24.5143	19	19	19	0.005713	0.0426138	5.34481	+	Intensity WT+Cys-SSH_Intensity WT	4	3	3	2	0	0	0	4	16.8	16.8	16.8	30.424	0	6.0182	74131000	15	7	3	3	2	0	0	0	262	262	13.7	11.8	7.3	0	0	0	40101000	10066000	23963000	0
Rho family GTPase	EHI_135450	C4M9S3	C4M9S3	28.4298	26.6321	27.7398	22.7066	22.8865	22.4191	0.00581264	0.0431609	4.80403	+	Intensity WT+Cys-SSH_Intensity WT	6	6	4	5	1	1	1	6	27.6	27.6	27.6	22.418	0	10.446	709950000	12	24	6	4	5	1	1	1	199	199	27.6	19.6	24.1	5.5	5.5	5.5	361600000	104010000	224140000	6845000
histidine--tRNA ligase	EHI_180020	C4M653	C4M653	22.7034	21.8121	23.1426	19	19	19	0.00591179	0.0434683	3.55272	+	Intensity WT+Cys-SSH_Intensity WT	2	1	1	1	0	0	0	2	4.2	4.2	4.2	57.878	0.0013727	1.5976	19772000	26	3	1	1	1	0	0	0	506	506	2.6	1.6	2.6	0	0	0	6829800	3682100	9260400	0
Amoebiasin-1	ICP1	Q6KCA4	Q6KCA4	27.0597	26.5611	27.0205	25.1888	24.6977	24.4151	0.00594169	0.0434683	1.9372	+	Intensity WT+Cys-SSH_Intensity WT	2	2	2	2	2	2	2	2	24.5	24.5	24.5	11.123	0	131.8	462870000	3	33	2	2	2	2	2	2	102	102	24.5	24.5	24.5	24.5	24.5	24.5	139890000	99014000	136140000	38245000
Large ribosomal subunit protein uL1	RPL10A	O15613	O15613	29.7615	28.0601	28.4499	23.7924	22.6523	21.9618	0.00594176	0.0434683	5.53481	+	Intensity WT+Cys-SSH_Intensity WT	11	11	7	6	2	1	1	11	47.7	47.7	47.7	23.856	0	46.848	1581900000	13	35	11	7	6	2	1	1	214	214	47.7	37.4	30.4	11.2	5.6	5.6	910129984	279849984	366680000	14529000
Sec7 domain protein	EHI_048270	C4M4B7	C4M4B7	22.4368	21.3855	21.6798	19	19	19	0.00596046	0.0434683	2.83403	+	Intensity WT+Cys-SSH_Intensity WT	1	1	1	1	0	0	0	1	0.6	0.6	0.6	196.15	0.0056926	1.1375	11776000	87	3	1	1	1	0	0	0	1690	1690	0.6	0.6	0.6	0	0	0	5677400	2739500	3359500	0
Damaged DNA binding protein, putative	EHI_194860	C4M401	C4M401	19	19	19	21.6581	22.9187	21.7024	0.00598649	0.0434683	-3.28841	+	Intensity WT+Cys-SSH_Intensity WT	2	0	0	0	1	1	1	2	2.4	2.4	2.4	123.83	0	9.2431	14651000	66	3	0	0	0	1	1	1	1088	1088	0	0	0	1.2	1.2	1.2	0	0	0	3309400
Uncharacterized protein	EHI_175060	C4LZN1	C4LZN1	25.2419	23.7017	23.3944	19	19	19	0.00616344	0.044556	5.11266	+	Intensity WT+Cys-SSH_Intensity WT	4	2	3	2	0	0	0	4	15.6	15.6	15.6	29.488	0	3.2712	64349000	15	7	2	3	2	0	0	0	256	256	7	10.5	8.2	0	0	0	39680000	13643000	11026000	0
TNase-like domain-containing protein	EHI_005150	C4M0A8	C4M0A8	29.2654	28.2295	29.011	24.3379	22.5384	22.1948	0.00623489	0.0448748	5.39718	+	Intensity WT+Cys-SSH_Intensity WT	19	15	11	13	2	1	1	19	18.9	18.9	18.9	98.89	0	29.313	1533100000	52	57	15	11	13	2	1	1	861	861	16.5	11	13.7	1.9	0.9	0.9	645320000	314729984	540990016	21205000
Uncharacterized protein	EHI_165080	C4M1Z0	C4M1Z0	23.93	22.5647	22.5719	19	19	19	0.00633259	0.0453789	4.02219	+	Intensity WT+Cys-SSH_Intensity WT	1	1	1	1	0	0	0	1	8.9	8.9	8.9	18.16	0.0062933	1.1204	28421000	9	3	1	1	1	0	0	0	157	157	8.9	8.9	8.9	0	0	0	15983000	6203500	6234700	0
Mboat family protein	EHI_039590	C4MA21	C4MA21	27.03	25.4854	24.4338	19	19	19	0.00641747	0.0457872	6.64972	+	Intensity WT+Cys-SSH_Intensity WT	4	3	3	2	0	0	0	4	7.9	7.9	7.9	57.909	0	51.261	206680000	14	11	3	3	2	0	0	0	483	483	7.7	5.8	5.6	0	0	0	137040000	46974000	22662000	0
60S ribosomal protein L11, putative	EHI_038580	C4LZP2;C4LZG9	C4LZP2;C4LZG9	26.4107	26.5128	27.3492	24.0413	23.4536	23.5863	0.00647055	0.0459661	3.01008	+	Intensity WT+Cys-SSH_Intensity WT	3	2	2	3	2	2	2	3	17.2	17.2	17.2	19.646	0	32.703	397280000	8	41	2	2	3	2	2	2	174	NaN	13.2	13.2	17.2	13.2	13.2	13.2	89209000	95754000	170970000	17265000
Protein kinase, putative	EHI_141930	C4LW39	C4LW39	23.4275	22.0774	23.4635	19	19	19	0.00657357	0.0464967	3.98947	+	Intensity WT+Cys-SSH_Intensity WT	1	1	1	1	0	0	0	1	3.5	3.5	3.5	58.661	0	10.309	27274000	31	3	1	1	1	0	0	0	511	511	3.5	3.5	3.5	0	0	0	11282000	4425400	11567000	0
Uncharacterized protein	EHI_000710	C4LZC0	C4LZC0	24.0139	22.4182	23.8822	19	19	19	0.00671931	0.0473236	4.43811	+	Intensity WT+Cys-SSH_Intensity WT	2	1	2	1	1	0	0	2	3	3	3	102.72	0	10.516	38007000	34	8	1	2	1	1	0	0	914	914	1.9	3	1.9	1.9	0	0	16940000	5604600	15462000	0
RING-type domain-containing protein	EHI_013190	C4LX85	C4LX85	23.27	22.0568	23.5548	19	19	19	0.00684411	0.04765	3.96053	+	Intensity WT+Cys-SSH_Intensity WT	5	2	1	3	0	0	0	5	7.5	7.5	7.5	97.819	0	3.3186	26801000	49	6	2	1	3	0	0	0	853	853	3	1.1	4.8	0	0	0	10115000	4362600	12323000	0
Uncharacterized protein	EHI_035510	C4LXY2	C4LXY2	30.0525	28.6204	29.1043	25.6755	25.1501	24.5903	0.00688954	0.04765	3.84624	+	Intensity WT+Cys-SSH_Intensity WT	10	10	5	9	1	1	1	10	32.8	32.8	32.8	28.658	0	69.699	2219400000	11	46	10	5	9	1	1	1	262	262	32.8	16.8	32.4	4.2	4.2	4.2	1113500032	412660000	577120000	53591000
Aldehyde dehydrogenase 1	ALDH1	P30840	P30840	29.6753	27.4018	26.202	19	19	19	0.00689482	0.04765	8.7597	+	Intensity WT+Cys-SSH_Intensity WT	17	17	6	4	0	0	0	17	23.4	23.4	23.4	59.773	0	51.578	1111900000	27	41	17	6	4	0	0	0	529	529	23.4	8.9	7.4	0	0	0	857360000	177320000	77194000	0
Nucleolar protein Nop56, putative	EHI_122740	C4M5N2	C4M5N2	26.1248	23.783	24.6798	19	19	23.1435	0.00690977	0.04765	5.8625	+	Intensity WT+Cys-SSH_Intensity WT	4	3	2	2	0	1	2	4	9.1	9.1	9.1	51.542	0	25.709	123750000	26	12	3	2	2	0	1	2	453	453	7.5	4	5.1	0	2.2	3.3	73171000	14434000	26875000	0
Dolichyl-diphosphooligosaccharide--protein glycosyltransferase subunit OST2	EHI_103780	C4LVM0	C4LVM0	30.0519	27.2982	26.6326	19	19	19	0.00691084	0.04765	8.99425	+	Intensity WT+Cys-SSH_Intensity WT	3	3	3	3	0	0	0	3	16.1	16.1	16.1	13.429	0	23.543	1382100000	5	17	3	3	3	0	0	0	118	118	16.1	16.1	16.1	0	0	0	1113100032	165040000	104040000	0
Golgi apparatus membrane protein TVP23 homolog	EHI_148020	C4LSX2	C4LSX2	28.7751	28.4672	27.705	20.7787	23.1079	22.406	0.00697096	0.047691	6.37248	+	Intensity WT+Cys-SSH_Intensity WT	4	3	4	3	1	2	1	4	13.3	13.3	13.3	23.072	0	18.392	1065600000	8	31	3	4	3	1	2	1	203	203	13.3	13.3	13.3	4.9	9.4	4.4	459369984	371089984	218790000	1798900
Unconventional myosin IB	EHI_110810	C4LUC7	C4LUC7	27.3953	26.2099	26.6003	23.6736	23.7927	22.6586	0.00697491	0.047691	3.00204	+	Intensity WT+Cys-SSH_Intensity WT	6	6	5	6	2	1	1	6	5.3	5.3	5.3	119.42	0	44.147	390430000	41	27	6	5	6	2	1	1	1049	1049	5.3	4.6	5.3	2.3	0.7	0.7	176530000	77620000	101740000	13380000
T-complex protein 1 subunit gamma	EHI_158250	C4M2E4	C4M2E4	25.9807	25.5664	26.8688	22.3768	22.8835	22.3269	0.00704659	0.0478618	3.50847	+	Intensity WT+Cys-SSH_Intensity WT	10	4	5	9	1	2	2	10	18.9	18.9	18.9	60.18	0	17.297	256900000	33	23	4	5	9	1	2	2	551	551	7.4	9.1	16.9	2.2	4.2	4.2	66215000	49689000	122550000	5446200
Nuclear pore protein, putative	EHI_183510	C4M730	C4M730	29.9647	29.031	29.5302	27.2501	26.9835	26.2684	0.00706647	0.0478618	2.39185	+	Intensity WT+Cys-SSH_Intensity WT	22	19	17	16	11	9	9	22	15.8	15.8	15.8	185.87	0	211.54	2744800000	78	152	19	17	16	11	9	9	1701	1701	14.4	11.5	11.4	8	6.5	6.5	1047800000	548529984	775289984	159620000
Ankyrin repeat protein, putative	EHI_155190	C4LW73	C4LW73	23.6681	22.101	22.803	19	19	19	0.00710212	0.0478618	3.85734	+	Intensity WT+Cys-SSH_Intensity WT	1	1	1	1	0	0	0	1	1.6	1.6	1.6	78.104	0.0080446	1.0521	25145000	32	3	1	1	1	0	0	0	708	708	1.6	1.6	1.6	0	0	0	13329000	4498400	7317700	0
Thioredoxin, putative	EHI_110350	C4LU87	C4LU87	27.3772	26.8918	27.6814	21.7193	19	19	0.00711656	0.0478618	6.95718	+	Intensity WT+Cys-SSH_Intensity WT	9	7	4	8	1	0	0	9	17.5	17.5	17.5	59.061	0	19.38	517560000	29	26	7	4	8	1	0	0	504	504	15.5	7.9	17.5	3	0	0	174330000	124520000	215250000	3452700
Ras guanine nucleotide exchange factor, putative	EHI_113430	C4M9W1	C4M9W1	22.5998	22.0836	23.603	19	19	19	0.00728919	0.0485258	3.7621	+	Intensity WT+Cys-SSH_Intensity WT	1	1	1	1	0	0	0	1	2.5	2.5	2.5	51.155	0.00073206	2.0211	23542000	27	3	1	1	1	0	0	0	440	440	2.5	2.5	2.5	0	0	0	6356300	4444400	12741000	0
Rab family GTPase	EHI_130670	A0A8U0WQ29	A0A8U0WQ29	26.1377	24.9887	26.2008	20.9532	19	19	0.00729625	0.0485258	5.79913	+	Intensity WT+Cys-SSH_Intensity WT	4	3	3	4	1	0	0	4	23.2	23.2	23.2	21.929	0	12.844	186280000	12	9	3	3	4	1	0	0	194	194	17	17.5	23.2	5.7	0	0	73832000	33292000	77129000	2030200
Plastin-2, putative; Calponin-homology (CH) domain-containing protein	EHI_105670	C4MBS6;C4M596	C4MBS6;C4M596	24.4231	22.567	23.8023	19	19	19	0.007304	0.0485258	4.59748	+	Intensity WT+Cys-SSH_Intensity WT	2	1	2	2	0	0	0	2	9.7	9.7	9.7	26.02	0.0068793	1.1005	43338000	13	6	1	2	2	0	0	0	227	NaN	6.2	9.7	9.7	0	0	0	22495000	6213700	14629000	0
Signal peptidase, putative	EHI_031250	C4M4K7	C4M4K7	29.8224	28.4325	28.4996	25.1587	25.0643	24.7996	0.00738056	0.0488114	3.80671	+	Intensity WT+Cys-SSH_Intensity WT	5	5	5	5	3	2	3	5	8.8	8.8	8.8	38.18	0	37.065	1792900000	11	59	5	5	5	3	2	3	340	340	8.8	8.8	8.8	6.2	5.6	6.2	949369984	362280000	379529984	37456000
Acetyl-CoA synthetase, putative	EHI_178960	C4LUV9	C4LUV9	31.7276	30.793	31.312	28.928	28.3844	27.7512	0.00740844	0.0488114	2.62133	+	Intensity WT+Cys-SSH_Intensity WT	36	25	27	30	11	13	9	36	43.9	43.9	43.9	77.478	0	121.22	9169500000	39	215	25	27	30	11	13	9	713	713	32.1	32.5	38.8	14.6	17.5	10.5	3556000000	1860499968	2665900032	510750016
dihydropyrimidine dehydrogenase (NADP(+))	EHI_012980	C4LX69	C4LX69	28.0543	27.3225	29.1458	23.7899	23.1193	22.1048	0.00745404	0.0488114	4.71961	+	Intensity WT+Cys-SSH_Intensity WT	22	14	9	22	3	2	1	22	28.7	28.7	28.7	98.781	0	109.92	1068700000	45	70	14	9	22	3	2	1	901	901	21.2	12.4	28.7	4.1	2.7	1.1	278740000	167840000	593980032	14504000
Long-chain-fatty-acid--CoA ligase, putative	EHI_188590	C4M8C0	C4M8C0	27.6349	24.7653	25.7386	19	19	19	0.00746596	0.0488114	7.04628	+	Intensity WT+Cys-SSH_Intensity WT	7	7	4	4	0	0	0	7	12.8	12.8	12.8	73.434	0	147.38	292920000	29	18	7	4	4	0	0	0	648	648	12.8	7.9	7.9	0	0	0	208420000	28517000	55988000	0
Transmembrane protein	EHI_069270	C4LWL5	C4LWL5	28.4332	26.4721	26.3713	21.5926	21.494	19	0.00773215	0.0501088	5.54885			10	10	5	6	1	2	0	10	19.3	19.3	19.3	57.066	0	89.301	548450000	16	50	10	5	6	1	2	0	487	487	19.3	12.3	14	3.5	6.2	0	362440000	93087000	86804000	3162500
Uncharacterized protein	EHI_151680	C4LSK9	C4LSK9	21.2179	20.7331	21.6577	19	19	19	0.00775788	0.0501088	2.20289			1	1	1	1	0	1	0	1	1.9	1.9	1.9	79.048	0.00074794	2.1573	7490400	47	4	1	1	1	0	1	0	687	687	1.9	1.9	1.9	0	1.9	0	2439000	1743000	3308300	0
Uncharacterized protein	EHI_035200	C4M4Z8	C4M4Z8	23.8764	24.0897	23.9449	23.3487	23.1328	22.773	0.00777988	0.0501088	0.729569			3	1	2	2	1	1	1	3	7.7	7.7	7.7	36.869	0	3.8349	76448000	16	11	1	2	2	1	1	1	325	325	3.7	7.4	4	3.7	3.7	3.7	15400000	17853000	16148000	10682000
Exocyst complex component sec15, putative	EHI_125680	C4LVV5	C4LVV5	26.5374	23.9063	25.3742	19	19	21.0847	0.00778657	0.0501088	6.27264			9	8	3	5	0	0	1	9	13.3	13.3	13.3	85.722	0	82.23	158840000	47	18	8	3	5	0	0	1	735	735	12.4	4.6	8.8	0	0	1	97399000	15722000	43492000	0
Glycerophosphocholine acyltransferase 1; Glycerophosphocholine acyltransferase 1 (Fragment)	EHI_050950	C4LTW5;B1N575	C4LTW5;B1N575	28.0744	26.3919	24.9277	19	19	19	0.00786495	0.0503331	7.46468			6	6	3	3	0	0	0	6	15.9	15.9	15.9	41.025	0	56.77	402610000	12	16	6	3	3	0	0	0	345	NaN	15.9	9.3	13	0	0	0	282649984	88052000	31915000	0
Zn-dependent peptidase, putative	EHI_124430	C4LZH9	C4LZH9	24.9093	23.8364	25.176	21.2491	21.3125	19	0.0078982	0.0503331	3.35977			6	4	3	5	1	1	1	6	5.7	5.7	5.7	111.46	0	8.3401	89494000	56	17	4	3	5	1	1	1	969	969	3.8	3.1	5	0.9	0.9	0.9	31509000	14979000	37909000	2492400
Small ribosomal subunit protein eS19; 40S ribosomal protein S19, putative	RPS19	O15631;C4MA13	O15631;C4MA13	26.2885	23.7526	25.6276	19	19	19	0.00791344	0.0503331	6.2229			6	5	2	5	0	0	0	6	33.5	33.5	33.5	17.746	0	8.7219	147940000	11	14	5	2	5	0	0	0	155	NaN	27.7	12.3	28.4	0	0	0	81965000	14133000	51843000	0
F-box domain-containing protein	EHI_092200	C4LUY5	C4LUY5	22.4417	21.2468	22.1674	19	19	19	0.00798006	0.0505609	2.95194			1	1	1	1	0	0	0	1	3.3	3.3	3.3	54.902	0.00076046	2.2521	12895000	26	3	1	1	1	0	0	0	488	488	3.3	3.3	3.3	0	0	0	5696600	2488400	4710200	0
Uncharacterized protein	EHI_035730	B1N2Z1	B1N2Z1	26.4562	23.9131	24.804	19	19	19	0.00808585	0.0509122	6.05774			2	2	2	2	0	0	0	2	2.9	2.9	2.9	78.926	0	6.8378	137150000	36	7	2	2	2	0	0	0	679	679	2.9	2.9	2.9	0	0	0	92065000	15796000	29292000	0
B30.2/SPRY domain-containing protein	EHI_085950	C4M350	C4M350	23.096	21.8333	21.9373	19	19	19	0.00809756	0.0509122	3.28889			1	1	1	1	0	0	0	1	2.4	2.4	2.4	68.533	0	11.713	16719000	36	3	1	1	1	0	0	0	587	587	2.4	2.4	2.4	0	0	0	8966000	3736600	4016000	0
Small ribosomal subunit protein uS4; 40S ribosomal protein S9, putative	11.t00056	O15612;C4LUW3	O15612;C4LUW3	25.2875	23.3231	25.5698	19	19	19	0.00815988	0.0510149	5.7268			3	2	2	3	0	0	0	3	23.2	23.2	23.2	21.502	0	5.3948	101250000	10	10	2	2	3	0	0	0	185	NaN	10.8	10.8	23.2	0	0	0	40955000	10494000	49805000	0
Multidrug resistance protein 1	MDR1	P16875	P16875	26.0358	24.6464	23.5816	19	19	19	0.00817606	0.0510149	5.75461			2	2	2	1	0	0	0	2	1.7	1.7	1.7	144.97	0	6.4325	107610000	65	8	2	2	1	0	0	0	1302	1302	1.7	1.7	1.2	0	0	0	68794000	26261000	12554000	0
Actin-binding protein, cofilin/tropomyosin family	EHI_186840	C4LVQ1	C4LVQ1	29.6258	28.3583	29.1504	26.0104	26.0976	24.9291	0.00825406	0.0512969	2.99082			11	11	6	8	4	5	4	11	55.5	55.5	55.5	16.332	0	116.58	1939700000	8	61	11	6	8	4	5	4	146	146	55.5	37	37.7	21.9	30.1	21.9	828400000	344120000	595840000	67596000
Uncharacterized protein	EHI_193470	B1N3M1	B1N3M1	24.7187	22.8467	23.2337	19	19	19	0.00828378	0.0512969	4.59972			2	1	2	1	0	0	0	2	23.7	23.7	23.7	10.423	0.00071685	1.8871	45018000	3	4	1	2	1	0	0	0	93	93	8.6	23.7	8.6	0	0	0	27611000	7543100	9863700	0
CYRIA/CYRIB Rac1 binding domain-containing protein	EHI_015300	C4M0W8;B1N457	C4M0W8	28.5291	27.4633	28.1368	25.5317	25.0264	24.1618	0.00834423	0.0514434	2.76396			9	8	7	7	3	3	2	9	32.9	32.9	32.9	36.445	0	118.31	968990000	20	45	8	7	7	3	3	2	319	NaN	24.5	29.8	21.6	11.6	11.6	6.9	387369984	185040000	295129984	48509000
Steroid 5-alpha reductase, putative	EHI_076870	C4M2S8	C4M2S8	34.0949	32.3487	31.8296	26.3313	27.2983	26.3897	0.00837014	0.0514434	5.9429			10	10	7	8	5	5	4	10	24.6	24.6	24.6	33.6	0	323.31	27971000000	11	167	10	7	8	5	5	4	285	285	24.6	18.2	21.1	18.2	18.2	14	18347999232	5469100032	3816399872	84432000
AP-2 complex subunit alpha	EHI_045710	A0A8U0WPP0	A0A8U0WPP0	28.7359	27.3894	27.9271	24.4487	24.9389	23.8558	0.0085043	0.052073	3.32367			14	13	11	9	2	3	3	14	15.9	15.9	15.9	109.19	0	99.384	948310000	47	60	13	11	9	2	3	3	961	961	15.2	12.7	10.3	2.3	3.3	3.3	447060000	175800000	255210000	22898000
U3 small nucleolar RNA-associated protein 20 C-terminal domain-containing protein	EHI_148770	C4LT45	C4LT45	22.7597	23.6435	21.9939	19	19	19	0.00855281	0.0521753	3.79905			4	1	3	1	0	0	0	4	1.8	1.8	1.8	287.43	0	4.8187	24382000	128	5	1	3	1	0	0	0	2455	2455	0.3	1.5	0.6	0	0	0	7101600	13104000	4176700	0
Calcium binding family protein; Calmodulin, putative	EHI_177620	C4LY16;C4LT56	C4LY16;C4LT56	25.0511	23.0815	25.2128	19	19	19	0.0086079	0.0522929	5.44847			2	2	1	2	0	0	0	2	13.7	13.7	13.7	16.888	0	15.966	82529000	10	11	2	1	2	0	0	0	146	NaN	13.7	8.2	13.7	0	0	0	34764000	8876200	38888000	0
Calreticulin	CRT	P83003	P83003	32.3706	31.0381	31.8172	28.6152	28.7141	27.6934	0.00864823	0.0522929	3.07729			23	22	19	21	11	15	9	23	53	53	53	45.08	0	323.31	12610000000	25	230	22	19	21	11	15	9	389	389	53	44	51.9	26.5	37.3	26.5	5553099776	2204900096	3783699968	411180000
Receptor mediated endocytosis protein, putative	EHI_105270	C4M131	C4M131	28.9883	28.2612	28.157	25.2842	23.8382	23.5557	0.00866769	0.0522929	3.90769			12	9	8	5	2	2	2	2	23.1	23.1	3.6	57.634	0	37.44	1221700000	29	38	2	2	2	0	0	0	507	507	17.2	17	9.9	3.9	3.9	3.9	532540000	321720000	299300000	40859000
ADP-ribosylglycohydrolase, putative	EHI_198770	C4LWS3	C4LWS3	25.1494	22.9342	24.4514	19	19	19	0.00871267	0.0523718	5.17834			2	2	1	2	0	0	0	2	7.6	7.6	7.6	49.821	0	42.868	68172000	22	7	2	1	2	0	0	0	432	432	7.6	2.1	7.6	0	0	0	37216000	8014400	22941000	0
Chitobiosyldiphosphodolichol beta-mannosyltransferase, putative	EHI_028950	C4M4V9	C4M4V9	28.1469	25.9139	25.0085	19	19	19	0.00880934	0.0524747	7.35643			9	9	4	5	0	0	0	9	24.1	24.1	24.1	49.502	0	77.924	394180000	22	25	9	4	5	0	0	0	427	427	24.1	12.2	15.2	0	0	0	297200000	63222000	33753000	0
Lipid phosphate phosphatase, putative	EHI_165320	C4M210	C4M210	25.5292	23.6599	23.4495	19	19	19	0.00881375	0.0524747	5.21286			2	2	2	1	0	0	0	2	11	11	11	28.891	0	19.096	73132000	10	5	2	2	1	0	0	0	255	255	11	11	6.3	0	0	0	48423000	13254000	11455000	0
Cortexillin, putative	EHI_191900	C4M741	C4M741	27.3111	26.3305	26.5154	24.3514	24.3436	24.6884	0.00882573	0.0524747	2.37152			12	8	7	8	1	2	2	12	16.9	16.9	16.9	89.265	0	42.846	416560000	37	26	8	7	8	1	2	2	753	753	10.9	10.2	11.8	1.2	2.9	2.3	166520000	84384000	95928000	21404000
LMBR1 family region protein; Uncharacterized protein	EHI_015360	C4M0X4;B1N4V5	C4M0X4;B1N4V5	27.5007	24.4558	25.7808	19	19	19	0.00895673	0.0526461	6.91242			2	2	2	1	0	0	0	2	7.1	7.1	7.1	55.311	0	72.008	270560000	7	9	2	2	1	0	0	0	481	NaN	7.1	7.1	3.7	0	0	0	189910000	23010000	57648000	0
Lysozyme, putative	EHI_096570	C4LWG9	C4LWG9	23.7386	22.027	22.855	19	19	19	0.00896894	0.0526461	3.87353			2	2	1	2	0	0	0	2	12.7	12.7	12.7	23.485	0	6.9423	25857000	3	5	2	1	2	0	0	0	212	212	12.7	7.5	12.7	0	0	0	13997000	4273500	7586400	0
Histidine triad nucleotide-binding protein	EHI_093910	C4LYI2	C4LYI2	23.1461	21.667	22.2771	19	19	19	0.0089713	0.0526461	3.36344			1	1	1	1	0	0	0	1	12.4	12.4	12.4	12.701	0.0013966	1.7049	17695000	7	3	1	1	1	0	0	0	113	113	12.4	12.4	12.4	0	0	0	9282900	3329900	5082600	0
Rho family GTPase	EHI_013260	C4LX92	C4LX92	31.6441	30.3021	30.7394	26.3896	27.4815	27.0303	0.00898288	0.0526461	3.9597			11	11	7	8	2	2	2	2	47.2	47.2	11.1	22.314	0	24.911	6884900000	13	62	2	2	2	1	1	1	199	199	47.2	39.7	39.7	10.6	10.6	10.6	3356000000	1323900032	1792599936	87912000
Rab family GTPase	EHI_005460	A0A8U0WP83	A0A8U0WP83	29.3361	27.5886	27.5098	19	21.7563	21.4855	0.00905303	0.0528684	7.76672			8	6	4	6	0	1	1	8	63.8	49.8	49.8	23.287	0	59.847	1077100000	15	46	6	4	6	0	1	1	207	207	44.4	40.1	49.8	0	4.8	4.8	677729984	201830000	191110000	0
RING-type domain-containing protein	EHI_040650	C4M5P4	C4M5P4	25.9875	25.1767	26.4281	23.0721	22.7074	21.9742	0.00909199	0.0529076	2.9744			9	8	5	7	2	1	1	8	7.4	7.4	6.9	138.9	0	11.587	214540000	65	25	7	5	7	2	1	1	1225	1225	6.3	4.5	6.3	1.8	1.1	0.7	66530000	37926000	90295000	8818300
Alpha/beta hydrolase domain protein, putative	EHI_152050	C4LSP4	C4LSP4	23.8441	22.1585	22.6438	19	19	19	0.00926171	0.0537048	3.88216			1	1	1	1	0	0	0	1	2.6	2.6	2.6	43.787	0.0099473	0.79347	26294000	18	3	1	1	1	0	0	0	389	389	2.6	2.6	2.6	0	0	0	15059000	4681400	6553500	0
60S ribosomal protein L38, putative	EHI_099790	C4M6F9;C4M7I6	C4M6F9;C4M7I6	24.1693	22.4919	24.4339	19	19	19	0.00933638	0.053826	4.69838			2	1	1	2	0	0	0	2	22.6	22.6	22.6	9.5664	0	5.2794	47429000	4	3	1	1	2	0	0	0	84	NaN	10.7	11.9	22.6	0	0	0	18866000	5898600	22664000	0
Uncharacterized protein	EHI_036630	C4M5F9	C4M5F9	24.6817	23.0015	22.8626	19	19	19	0.00934821	0.053826	4.51529			1	1	1	1	0	0	0	1	7.8	7.8	7.8	17.162	0	7.2556	42936000	9	4	1	1	1	0	0	0	153	153	7.8	7.8	7.8	0	0	0	26912000	8397600	7626500	0
G protein-coupled receptor 1	EHI_179320	C4M9X2	C4M9X2	26.2604	25.7171	25.6107	21.4463	19	20.8977	0.00949669	0.0544898	5.63963			4	2	3	3	1	0	1	4	8.9	8.9	8.9	56.385	0	17.758	191600000	16	18	2	3	3	1	0	1	492	492	4.9	6.9	6.9	2.8	0	2.8	80385000	55161000	51239000	2857400
Rap/Ran GTPase activating protein, putative	EHI_151270	C4LSH0	C4LSH0	25.21	24.9343	25.1215	19	21.2325	19	0.00958688	0.0547155	4.97233			4	3	1	2	0	1	0	4	7	7	7	91.553	0	31.348	109840000	43	9	3	1	2	0	1	0	798	798	5	2	3.6	0	2	0	38811000	32060000	36503000	0
Ral GTPase-activating protein subunit alpha/beta N-terminal domain-containing protein	EHI_140360	C4M484	C4M484	25.723	25.2828	26.7281	21.1801	19	19	0.00960272	0.0547155	5.82123			8	5	4	6	2	0	0	8	6.6	6.6	6.6	125.32	0	18.138	209740000	55	14	5	4	6	2	0	0	1092	1092	4.2	3.5	5	1.7	0	0	55384000	40821000	111160000	2376000
Uncharacterized protein	EHI_044360	C4M783	C4M783	30.1181	29.3669	29.8683	27.5871	28.0521	27.266	0.00977265	0.0554911	1.96483			5	5	4	5	2	3	3	5	13.7	13.7	13.7	29.779	0	22.435	3479000000	13	48	5	4	5	2	3	3	262	262	13.7	13	13.7	7.3	9.9	9.9	1165299968	692339968	980080000	201630000
Cdc48-like protein, putative	EHI_176970	C4LY22	C4LY22	24.9699	23.6471	24.7284	21.1035	21.4438	19	0.00982479	0.0555018	3.17477			5	4	3	5	1	1	0	4	7.4	7.4	6.3	86.417	0	12.82	78900000	50	16	3	2	4	1	1	0	772	772	5.8	4.3	7.4	2.3	2.3	0	32861000	13137000	27796000	2253200
Chorein, putative	EHI_067970	C4LTZ3	C4LTZ3	25.9909	24.423	25.1834	21.7576	20.9833	19	0.00984218	0.0555018	3.82863			10	8	5	4	1	1	0	10	3.6	3.6	3.6	381.92	0	21.177	132900000	175	19	8	5	4	1	1	0	3346	3346	2.9	1.7	1.6	0.2	0.2	0	66686000	22493000	38104000	3545700
VHS domain-containing protein	EHI_037540	C4MBC1	C4MBC1	22.667	22.2472	23.9861	19	19	19	0.0098835	0.0555439	3.96677			1	1	1	1	0	0	0	1	3.9	3.9	3.9	38.771	0	3.1033	28254000	18	4	1	1	1	0	0	0	331	331	3.9	3.9	3.9	0	0	0	6659800	4978200	16616000	0
Uncharacterized protein	EHI_068710	C4LU61	C4LU61	27.8711	26.0591	26.9132	22.8546	23.0766	19	0.00995748	0.0557687	3.98218			7	5	3	2	1	2	0	7	20.4	20.4	20.4	31.601	0	9.4417	458220000	15	17	5	3	2	1	2	0	260	260	16.9	7.3	6.5	3.8	6.5	0	245500000	69913000	126380000	7584600
Protein RER1	EHI_062460	C4M1N3	C4M1N3	28.0762	27.3004	27.1059	24.4209	23.0136	23.9335	0.0101123	0.0564431	3.7769			3	3	1	1	1	1	1	3	14.4	14.4	14.4	20.959	0	101.26	639680000	7	26	3	1	1	1	1	1	174	174	14.4	10.3	10.3	10.3	10.3	10.3	283000000	165290000	144440000	22461000
Adenylate kinase	AK	O96907	O96907	26.567	23.8693	24.621	19	19	19	0.0101969	0.0566318	6.01909			5	4	2	2	0	0	0	5	35.2	35.2	35.2	21.102	0	29.573	140540000	12	12	4	2	2	0	0	0	193	193	26.9	13.5	15.5	0	0	0	99417000	15324000	25802000	0
Phosphoinositide phosphatase, putative	EHI_141860	C4LW32	C4LW32	26.8852	24.2573	24.5438	19	19	19	0.0102151	0.0566318	6.22877			7	7	3	2	0	0	0	7	11.1	11.1	11.1	67.831	0	18.202	168460000	33	11	7	3	2	0	0	0	586	586	11.1	5.1	4.6	0	0	0	123950000	20053000	24458000	0
Rab family GTPase	EHI_053420	A0A8U0WNW9	A0A8U0WNW9	23.554	21.8469	23.1882	19	19	19	0.0103677	0.0572843	3.86302			2	1	2	1	0	0	0	2	9.9	9.9	9.9	23.627	0	8.123	25645000	12	4	1	2	1	0	0	0	213	213	6.6	9.9	6.6	0	0	0	12316000	3771900	9557300	0
Galactose-specific adhesin light subunit, putative	EHI_049690	B1N2L3	B1N2L3	23.0762	22.6294	23.1758	20.4095	19	19	0.0105567	0.0579388	3.25576			1	1	1	1	1	0	0	1	7.3	3.8	3.8	33.91	0.0044643	1.1726	26201000	17	4	1	1	1	1	0	0	288	288	7.3	7.3	7.3	7.3	3.5	3.5	8843800	6488400	9475700	1392700
Acid sphingomyelinase-like phosphodiesterase, putative	EHI_100080	C4M0T9	C4M0T9	22.5225	22.5299	24.1809	19	19	19	0.0105688	0.0579388	4.07775			2	1	1	2	0	0	0	2	4.4	4.4	4.4	46.223	0.010155	0.89186	31098000	21	6	1	1	2	0	0	0	406	406	2.5	2.5	4.4	0	0	0	6024900	6055800	19018000	0
Rho family GTPase	EHI_146180	C4M3R0	C4M3R0	28.4336	27.0792	27.9999	24.0799	24.8476	19	0.0105921	0.0579388	3.37387			5	4	3	4	2	2	0	4	25.5	25.5	20.4	24.04	0	46.037	820690000	9	29	3	2	3	1	1	0	216	216	21.8	16.7	21.8	13	16.7	0	362560000	141790000	268420000	17732000
ADP ribosylation factor, putative	EHI_073440	C4LXK8	C4LXK8	24.0894	22.4169	24.4751	19	19	19	0.0106306	0.0579561	4.66047			2	2	1	2	0	0	0	2	17	17	17	19.604	0	11.891	46770000	11	6	2	1	2	0	0	0	171	171	17	7.6	17	0	0	0	17850000	5599500	23321000	0
Uncharacterized protein	EHI_120470	B1N4A2	B1N4A2	25.5558	23.3444	23.574	19	19	19	0.0107528	0.0580013	5.15806			3	3	2	2	0	0	0	3	13.5	13.5	13.5	39.036	0	19.736	72461000	12	10	3	2	2	0	0	0	333	333	13.5	10.5	6.9	0	0	0	49324000	10650000	12488000	0
Diaphanous protein, homolog 1, putative	EHI_118260	C4LZ08	C4LZ08	25.6295	23.0807	24.5906	19	19	19	0.0107709	0.0580013	5.43359			3	2	2	2	0	0	0	3	3.5	3.5	3.5	130.86	0	44.707	86044000	63	7	2	2	2	0	0	0	1176	1176	2	2.7	2.7	0	0	0	51909000	8871200	25264000	0
Uncharacterized protein	EHI_130850	C4LXF3;B1N556	C4LXF3;B1N556	27.2171	25.2318	24.1749	19	19	19	0.0108021	0.0580013	6.54128			4	4	3	2	1	1	0	4	7.3	7.3	7.3	49.868	0	3.6224	214350000	20	12	4	3	2	1	1	0	425	NaN	7.3	5.6	3.8	1.9	1.9	0	156010000	39404000	18940000	0
Uncharacterized protein	EHI_151580	C4LSJ9	C4LSJ9	28.747	27.7566	28.047	26.06	25.9822	25.3293	0.0108048	0.0580013	2.16248			10	8	8	6	4	5	4	10	23	23	23	48.822	0	46.675	1133000000	24	52	8	8	6	4	5	4	434	434	19.4	16.6	11.8	9.4	9.4	9.4	450529984	226760000	277320000	69957000
Uncharacterized protein	EHI_118770	C4LYM5	C4LYM5	26.1389	25.2085	25.6995	22.2106	23.2493	22.224	0.0108156	0.0580013	2.95231			6	5	4	5	1	1	1	6	9.1	9.1	9.1	92.418	0	32.406	186870000	46	17	5	4	5	1	1	1	837	837	6.8	5.3	7.5	1.3	1.6	1.6	73889000	38772000	54490000	4853500
F-actin-capping protein subunit alpha	EHI_033740	C4M3N6	C4M3N6	27.4661	27.046	27.7487	25.8908	25.4676	24.7169	0.0108717	0.0581122	1.74105			8	3	8	6	3	2	2	8	34.8	34.8	34.8	30.519	0	93.439	685680000	15	52	3	8	6	3	2	2	270	270	14.4	34.8	28.5	14.1	8.5	8.5	185400000	138570000	225520000	62217000
Rab family GTPase	EHI_096440	A0A8U0WPK2	A0A8U0WPK2	25.6885	25.5033	23.217	19	19	19	0.0109441	0.0583093	5.80295			5	3	4	1	0	0	0	5	22.9	22.9	22.9	21.448	0	5.2693	111390000	10	9	3	4	1	0	0	0	188	188	14.9	18.6	4.8	0	0	0	54077000	47563000	9750300	0
Alcohol dehydrogenase, putative; Alcohol dehydrogenase 3, putative	EHI_088020	C4M6R1;B1N4T4	C4M6R1;B1N4T4	26.4376	23.652	24.6479	19	19	19	0.0111407	0.0588932	5.91248			4	4	1	1	0	0	0	3	12.8	10.5	7.9	42.573	0	19.149	130360000	17	8	3	1	1	0	0	0	382	NaN	12.8	2.6	5.2	2.4	2.4	2.4	90888000	13181000	26288000	0
Uncharacterized protein	EHI_170380	C4M7K5	C4M7K5	25.0389	23.0138	23.1542	19	19	19	0.0111472	0.0588932	4.73564			4	4	3	2	0	0	0	4	5.1	5.1	5.1	113.09	0	53.188	52275000	42	9	4	3	2	0	0	0	980	980	5.1	4.1	2.8	0	0	0	34471000	8469400	9335000	0
Protein-S-isoprenylcysteine O-methyltransferase	EHI_006100	C4M2P4	C4M2P4	28.0107	25.5735	24.7426	19	19	19	0.0111663	0.0588932	7.10892			3	3	2	1	0	0	0	3	15	15	15	28.605	0	38.104	348440000	6	11	3	2	1	0	0	0	246	246	15	8.9	3.3	0	0	0	270430016	49933000	28071000	0
Aurora kinase	EHI_033850;EHI_071	B1N539;B1N4I4;B1N433;C4MB42;C4M6E2;C4LY26	B1N539;B1N4I4;B1N433;C4MB42;C4M6E2;C4LY26	23.7586	21.9247	23.321	19	19	19	0.011223	0.0588932	4.00141			1	1	1	1	0	0	0	1	2.7	2.7	2.7	34.823	0.005689	1.1372	28652000	17	3	1	1	1	0	0	0	295	NaN	2.7	2.7	2.7	0	0	0	14192000	3980900	10479000	0
Rho family GTPase	EHI_190440	C4M9T7	C4M9T7	29.5296	25.9153	26.3315	19	19	19	0.0112331	0.0588932	8.25881			5	3	4	3	0	0	0	5	23.7	23.7	23.7	22.139	0	13.701	922720000	10	11	3	4	3	0	0	0	198	198	16.7	19.7	13.1	0	0	0	774990016	63282000	84447000	0
Uncharacterized protein	EHI_166960	B1N308;C4MA69	B1N308;C4MA69	27.7835	24.3884	25.9646	19	19	19	0.0114571	0.0595437	7.04551			1	1	1	1	0	0	0	1	8.8	8.8	8.8	13.329	0	2.6843	318480000	2	6	1	1	1	0	0	0	114	NaN	8.8	8.8	8.8	0	0	0	231030000	21960000	65484000	0
Uncharacterized protein	EHI_083620	C4M946	C4M946	27.2842	26.4825	28.5334	23.2384	23.0023	19	0.0114631	0.0595437	4.31303			16	8	11	12	3	2	0	16	11.6	11.6	11.6	185.07	0	68.712	664010000	76	41	8	11	12	3	2	0	1653	1653	6.6	8.2	9.1	2.1	1.1	0	163440000	93763000	388520000	9895700
Initiation factor eIF-2B delta subunit, putative	EHI_042980	C4M666	C4M666	29.3849	27.5199	27.5551	23.5321	23.8435	22.2553	0.0114936	0.0595437	4.4655			1	1	1	1	1	1	1	1	2.4	2.4	2.4	56.858	0	20.446	1122900000	25	12	1	1	1	1	1	1	510	510	2.4	2.4	2.4	2.4	2.4	2.4	701049984	192450000	197200000	12130000
GOLD domain-containing protein	EHI_038590	A0A8U0WP28	A0A8U0WP28	29.162	28.1884	28.8815	26.699	26.6284	25.946	0.0115024	0.0595437	2.0803			6	6	4	4	2	2	2	6	36.3	36.3	36.3	22.326	0	104.03	1678400000	10	40	6	4	4	2	2	2	193	193	36.3	25.4	21.8	14.5	14.5	14.5	600659968	305889984	494540000	108940000
Acyl-CoA synthetase, putative	EHI_135740	C4M964	C4M964	25.0457	22.6757	24.2654	19	19	19	0.0115405	0.0595535	4.9956			4	3	2	3	0	0	0	4	5.9	4.9	4.9	115.13	0	14.439	61499000	50	10	3	2	3	0	0	0	1017	1017	3.5	3.5	3.9	0	0	0	34634000	6699800	20166000	0
HEAT repeat domain containing protein	EHI_151640	C4LSK5	C4LSK5	28.0624	27.8184	28.5149	26.7107	26.4711	25.9529	0.0115934	0.0596387	1.54098			16	12	13	12	8	10	7	16	17.7	17.7	17.7	121.33	0	85.325	1168400000	48	104	12	13	12	8	10	7	1074	1074	14.3	15.3	14	8.5	9.7	7	280300000	236680000	383569984	109830000
FG-GAP repeat-containing protein	EHI_007970	C4LYD4	C4LYD4	28.2334	25.8306	26.9083	19	21.2892	19	0.0116506	0.0596683	6.84616			8	8	5	7	0	1	0	8	15.7	15.7	15.7	72.282	0	101.54	503760000	32	30	8	5	7	0	1	0	623	623	15.7	10.8	12.8	0	1.8	0	315569984	59673000	125950000	0
glutamine--fructose-6-phosphate transaminase (isomerizing)	EHI_029560	C4M7V7	C4M7V7	22.7274	24.0997	25.1468	19	19	19	0.0117158	0.0596683	4.9913			4	1	1	4	0	0	0	4	6	6	6	67.774	0	3.5321	62071000	32	7	1	1	4	0	0	0	621	621	1.3	1.3	6	0	0	0	6944300	17978000	37148000	0
Signal recognition particle subunit SRP68	EHI_146790	C4MB34	C4MB34	25.0526	22.7148	24.6489	19	19	19	0.011727	0.0596683	5.13879			1	1	1	1	0	0	0	1	3.9	3.9	3.9	54.572	0	31.798	67992000	21	5	1	1	1	0	0	0	457	457	3.9	3.9	3.9	0	0	0	34801000	6884000	26307000	0
B-keto acyl reductase, putative	EHI_163540	C4M3T5	C4M3T5	30.9925	28.9431	29.8264	25.7888	25.5582	24.2061	0.0117765	0.0596683	4.24716			12	12	9	11	5	3	1	12	40.4	40.4	40.4	36.568	0	304.12	3731200000	10	80	12	9	11	5	3	1	319	319	40.4	36.1	40.4	17.6	12.2	4.7	2136300032	516120000	952019968	57969000
60S ribosomal protein L17, putative	EHI_008620	C4M0M6;C4M2J3;C4LX05	C4M0M6;C4M2J3;C4LX05	25.9751	25.3087	26.0648	24.0455	24.1162	23.6733	0.0117809	0.0596683	1.70202			3	1	3	1	1	1	1	3	14.1	14.1	14.1	19.779	0.001386	1.6273	226590000	7	9	1	3	1	1	1	1	177	NaN	4	14.1	4	4	4	4	65959000	41561000	70192000	17315000
Exocyst complex component sec10, putative	EHI_099810	C4M6G1	C4M6G1	26.7112	25.5517	26.5382	19	21.6496	19	0.0121847	0.0612645	5.94226			7	6	4	6	0	1	0	7	10.3	10.3	10.3	86.735	0	21.834	259800000	41	21	6	4	6	0	1	0	744	744	8.9	5.9	8.9	0	0.9	0	109870000	49185000	97452000	0
Cysteine proteinase 1	CP1	Q01957	Q01957	29.2014	28.4509	28.9503	26.6206	27.208	26.1877	0.0122085	0.0612645	1.95324			8	7	6	6	3	4	4	8	39.7	39.7	39.7	35.083	0	175.39	1837600000	16	76	7	6	6	3	4	4	315	315	39.7	23.8	32.4	13.7	15.9	21.6	617299968	366910016	518700000	103180000
HEAT repeat domain containing protein	EHI_068630	C4LU53;B1N2K9	C4LU53	24.904	23.9945	27.0277	19	19	19	0.0122111	0.0612645	6.30873			10	3	2	8	0	0	0	10	16.7	16.7	16.7	63.603	0	13.483	184930000	40	16	3	2	8	0	0	0	551	NaN	5.1	3.4	13.8	0	0	0	31395000	16713000	136820000	0
Vacuolar protein sorting-associated protein 35	EHI_095930	C4M3E8	C4M3E8	23.7827	21.8841	22.866	19	19	19	0.0122454	0.0612645	3.84426			2	2	1	1	0	0	0	2	3.4	3.4	3.4	79.604	0	5.9719	25946000	32	5	2	1	1	0	0	0	705	705	3.4	2.3	2.3	0	0	0	14431000	3870500	7644700	0
Uncharacterized protein	EHI_194850	C4M400	C4M400	25.4071	22.8453	24.5567	19	19	19	0.0123308	0.0615042	5.26967			3	3	2	2	0	0	0	3	7.9	7.9	7.9	61.541	0	17.795	76705000	25	7	3	2	2	0	0	0	534	534	7.9	4.7	5.8	0	0	0	44493000	7535500	24677000	0
HEAT repeat domain containing protein	EHI_097470	C4M930	C4M930	26.6906	26.1876	27.3302	24.1822	23.1948	22.3615	0.0123986	0.061655	3.04761			6	5	4	6	2	2	1	6	6.8	6.8	6.8	118.06	0	36.683	387510000	45	28	5	4	6	2	2	1	1055	1055	6	4.8	6.8	2.5	2.8	1.3	108310000	76429000	168740000	19036000
Vacuolar protein sorting 26	EHI_162540	C4MAP0;B1N4B1	C4MAP0	31.0436	28.8382	29.3079	25.1257	25.0261	23.3979	0.0126427	0.0625884	4.65402			14	14	8	8	2	3	2	14	36.9	36.9	36.9	55.911	0	269.27	3439800000	21	90	14	8	8	2	3	2	471	NaN	36.9	21.4	24.6	6.8	9.3	6.8	2213400064	479900000	664600000	36609000
Uncharacterized protein	EHI_070790	C4M5S5	C4M5S5	27.0762	24.6079	24.1604	19	19	19	0.0126626	0.0625884	6.28152			9	9	4	5	0	0	0	9	18.6	18.6	18.6	73	0	83.772	185820000	26	23	9	4	5	0	0	0	634	634	18.6	9.5	11.7	0	0	0	141500000	25570000	18750000	0
Major facilitator superfamily transporter	EHI_194990	C4M404	C4M404	23.7458	21.9205	22.5018	19	19	19	0.0127344	0.0627543	3.72268			2	2	1	1	0	0	0	2	5.2	5.2	5.2	64.786	0	3.1749	23976000	20	3	2	1	1	0	0	0	577	577	5.2	3.1	3.1	0	0	0	14067000	3969300	5938900	0
3-ketoacyl-CoA synthase	EHI_112870	C4M9M6	C4M9M6	29.7813	26.612	25.7889	19	19	19	0.0128227	0.0627756	8.39407			14	14	7	3	0	0	0	14	30.3	30.3	30.3	53.723	0	137.84	1083200000	24	37	14	7	3	0	0	0	478	478	30.3	18.4	8.6	0	0	0	922680000	102570000	57975000	0
Phosphatidic acid phosphatase type 2/haloperoxidase domain-containing protein	EHI_169810	C4M1A4	C4M1A4	25.7276	23.0945	24.0714	19	19	19	0.0128417	0.0627756	5.29783			1	1	1	1	0	0	0	1	5.5	5.5	5.5	31.214	0	61.076	82148000	13	5	1	1	1	0	0	0	271	271	5.5	5.5	5.5	0	0	0	55564000	8956400	17628000	0
TBC/Rab GTPase activating domain containing protein	EHI_121850	C4M5D1	C4M5D1	22.1563	21.3021	20.9493	19	19	19	0.0128535	0.0627756	2.4692			1	1	1	1	0	0	0	1	2.6	2.6	2.6	64.167	0	5.4565	9284300	28	3	1	1	1	0	0	0	547	547	2.6	2.6	2.6	0	0	0	4674100	2585600	2024700	0
Ubiquitin, putative	EHI_083270	C4M760;C4LY85	C4M760;C4LY85	30.9466	29.8066	30.6437	27.6196	26.3076	26.804	0.0129523	0.0630706	3.50202			6	6	5	6	3	2	2	6	68.8	68.8	68.8	8.6979	0	122.95	5092400000	4	109	6	5	6	3	2	2	77	NaN	68.8	61	68.8	44.2	32.5	32.5	2069399936	939020032	1677500032	206220000
methionine--tRNA ligase	EHI_079860	C4M2K7;B1N583	C4M2K7	26.6353	26.1991	26.7985	25.2144	25.356	24.3184	0.0130153	0.0631391	1.25909			12	6	5	9	5	4	4	11	17.4	17.4	15.1	85.102	0	24.398	400790000	46	39	5	5	9	5	4	4	754	NaN	8.9	6.9	13.1	6	4.9	5.2	104240000	77038000	116720000	38930000
Uncharacterized protein	EHI_035470	C4LXX8	C4LXX8	26.7831	24.7626	23.7546	19	19	19	0.0130632	0.0631391	6.1001			3	3	2	1	0	0	0	3	6.7	6.7	6.7	33.464	0	5.956	158100000	9	6	3	2	1	0	0	0	283	283	6.7	6	2.5	0	0	0	115480000	28464000	14153000	0
Mob1/phocein family protein	EHI_159570	C4LX38	C4LX38	24.4619	22.2378	23.6629	19	19	19	0.0130818	0.0631391	4.45417			1	1	1	1	0	0	0	1	6.2	6.2	6.2	24.635	0	5.3212	41335000	9	3	1	1	1	0	0	0	211	211	6.2	6.2	6.2	0	0	0	23108000	4945800	13281000	0
CDP-diacylglycerol--inositol 3-phosphatidyltransferase	EHI_069630	C4LWQ0	C4LWQ0	27.403	25.5264	24.035	19	19	19	0.0131767	0.0632256	6.65478			4	3	4	2	0	0	0	4	17.8	17.8	17.8	24.609	0	19.13	242990000	11	15	3	4	2	0	0	0	214	214	14.5	17.8	10.3	0	0	0	177470000	48328000	17189000	0
Longin-type vesicle-associated membrane protein, putative	EHI_022910	A0A8U0WPV6	A0A8U0WPV6	24.3493	25.347	22.757	19	19	19	0.0131768	0.0632256	5.15108			1	1	1	1	0	0	0	1	5.7	5.7	5.7	26.207	1	-2	71139000	10	4	1	1	1	0	0	0	228	228	5.7	5.7	5.7	0	0	0	21373000	42678000	7088100	0
Actin binding protein, putative	EHI_038800	C4LZQ3	C4LZQ3	22.8424	21.2672	22.2966	19	19	19	0.0133938	0.0640793	3.13542			1	1	1	1	0	0	0	1	1.9	1.9	1.9	88.129	0	2.4216	15196000	42	5	1	1	1	0	0	0	775	775	1.9	1.9	1.9	0	0	0	7520500	2523900	5151800	0
HEAT repeat domain containing protein	EHI_069480	C4LWN6	C4LWN6	26.5604	24.4258	26.5023	20.7273	21.2413	19	0.0135987	0.0647119	4.84526			8	6	4	6	1	1	0	8	12.9	12.9	12.9	78.374	0	32.181	220780000	43	27	6	4	6	1	1	0	707	707	10	6.6	9.5	2	2	0	98965000	22537000	95061000	1735900
Uncharacterized protein	EHI_021290	C4M044	C4M044	23.3479	21.6622	23.3385	19	19	19	0.0136049	0.0647119	3.78287			2	2	1	1	0	0	0	2	1.5	1.5	1.5	162.36	0	2.7989	24602000	80	5	2	1	1	0	0	0	1370	1370	1.5	0.9	0.9	0	0	0	10676000	3318800	10607000	0
Uncharacterized protein	EHI_044370	C4M784	C4M784	28.8416	27.4071	27.4532	24.8417	24.4593	23.4524	0.0137628	0.0648334	3.25017			12	10	8	9	3	3	2	12	19.8	19.8	19.8	77.569	0	86.567	907410000	28	47	10	8	9	3	3	2	681	681	18.8	10.7	14.7	4.8	4.1	3.1	481060000	177980000	183760000	30067000
60S ribosomal protein L27a, putative; Large ribosomal subunit protein uL15A	EHI_020370	C4M7V3;Q9BI06;Q9BH80	C4M7V3;Q9BI06;Q9BH80	26.131	25.4876	26.8507	23.561	22.9476	22.8185	0.0137651	0.0648334	2.90208			1	1	1	1	1	1	1	1	9	9	9	15.021	0	4.3386	269420000	6	8	1	1	1	1	1	1	133	NaN	9	9	9	9	9	9	73488000	47046000	121020000	12376000
Glucosamine 6-phosphate N-acetyltransferase	EHI_186340	C4LVN5	C4LVN5	26.9736	26.9232	27.4953	25.8423	25.935	25.1135	0.0137821	0.0648334	1.24209			6	4	5	6	4	4	3	6	48.4	48.4	48.4	18.043	0	130.22	608850000	8	36	4	5	6	4	4	3	159	159	30.8	42.1	48.4	30.8	30.8	24.5	131780000	127260000	189200000	60158000
Glycerophosphocholine acyltransferase 1	EHI_109690	C4M3J9	C4M3J9	25.6147	23.0687	23.7155	19	19	19	0.0137884	0.0648334	5.13299			2	2	1	2	0	0	0	2	6.1	6.1	6.1	46.314	0	8.6453	73951000	16	8	2	1	2	0	0	0	391	391	6.1	3.1	6.1	0	0	0	51379000	8798000	13775000	0
Uncharacterized protein	EHI_052880	C4M3S6	C4M3S6	23.4074	21.8504	21.9301	19	19	19	0.0138486	0.0649302	3.39595			2	2	1	2	0	0	0	2	1.3	1.3	1.3	199.77	0.0062657	1.1071	18903000	68	4	2	1	2	0	0	0	1784	1784	1.3	0.7	1.3	0	0	0	11126000	3781100	3995800	0
Uncharacterized protein	EHI_092620	C4LV22	C4LV22	26.7419	25.4182	25.1867	22.2418	22.657	22.4299	0.014017	0.0652139	3.33289			2	2	2	1	1	1	1	2	6.7	6.7	6.7	46.833	0	46.094	212480000	24	13	2	2	1	1	1	1	415	415	6.7	6.7	3.9	3.9	3.9	3.9	112230000	44837000	38191000	4959600
CXXC-rich protein	EHI_092460	C4LV08	C4LV08	24.0161	24.8767	22.4346	19	19	19	0.0140198	0.0652139	4.77578			3	2	2	2	0	0	0	3	15.8	15.8	15.8	24.002	0	6.2344	53439000	10	8	2	2	2	0	0	0	209	209	12.4	8.1	12.4	0	0	0	16965000	30806000	5668700	0
Thioredoxin, putative	EHI_170420	C4M7K9	C4M7K9	26.8905	25.3588	26.8452	23.1039	22.4519	22.134	0.0140284	0.0652139	3.58694			2	2	2	2	1	1	1	2	16	16	16	13.333	0	14.912	307360000	3	11	2	2	2	1	1	1	119	119	16	16	16	9.2	9.2	9.2	124410000	43029000	120560000	9015200
Papain family cysteine protease domain containing protein	EHI_182770	C4LV58	C4LV58	28.5498	27.0933	27.4255	24.7795	24.7182	24.2038	0.0140824	0.0652314	2.94068			5	5	3	4	2	2	3	5	8.1	8.1	8.1	71.881	0	184.71	792120000	28	46	5	3	4	2	2	3	627	627	8.1	4.9	6.9	3.2	3.2	4.9	392960000	143180000	180260000	28799000
Syntaxin, putative	EHI_148750	C4LT43;A0A8U0WPW9	C4LT43;A0A8U0WPW9	23.4742	21.8714	21.982	19	19	19	0.0141185	0.0652314	3.44254			1	1	1	1	0	0	0	1	4.7	4.7	4.7	32.161	0.00071531	1.8765	19632000	11	4	1	1	1	0	0	0	278	NaN	4.7	4.7	4.7	0	0	0	11653000	3836700	4142300	0
Rab5-interacting protein	EHI_196950	C4LVB3	C4LVB3	26.81	23.6587	24.8597	19	19	19	0.0141632	0.0652314	6.10949			3	3	2	2	0	0	0	3	22.1	22.1	22.1	11.714	0	28.235	161350000	2	11	3	2	2	0	0	0	104	104	22.1	12.5	12.5	0	0	0	117660000	13243000	30445000	0
NAD-dependent epimerase/dehydratase domain-containing protein	EHI_098800	C4M882	C4M882	30.5611	29.3332	29.6061	27.3827	27.3302	26.9606	0.0141911	0.0652314	2.47701			13	11	11	9	3	3	3	13	38.9	38.9	38.9	40.964	0	81.67	3552100000	23	78	11	11	9	3	3	3	365	365	34.5	33.4	28.5	7.4	9	11.2	1584199936	676369984	817169984	174990000
HEAT repeat domain containing protein	EHI_078260	C4M541	C4M541	28.2693	28.142	29.3382	26.0331	25.2191	24.8051	0.0143163	0.0656229	2.9571			36	22	24	30	8	7	6	36	18.2	18.2	18.2	237.81	0	133.68	1435500000	120	126	22	24	30	8	7	6	2075	2075	11.5	11.3	15.3	4.2	3.4	2.9	323520000	296209984	678700032	68665000
Rab family GTPase	EHI_045550	A0A8U0WPN9	A0A8U0WPN9	29.4916	27.2385	29.0828	24.2046	23.7808	23.7028	0.0147676	0.0675032	4.61166			5	3	5	5	1	1	1	4	27.2	27.2	21.8	23.324	0	70.343	1529200000	12	24	2	4	4	0	0	0	206	206	18.4	27.2	27.2	5.3	5.3	5.3	754860032	158350000	568579968	19333000
Ras-related protein Rab	EHI_177520	A0A8U0WPU0	A0A8U0WPU0	30.0317	28.2618	29.1558	25.9092	25.6078	25.0906	0.0148308	0.0676039	3.39125			12	10	10	11	3	3	2	12	62.7	62.7	62.7	23.379	0	105.22	2167400000	14	58	10	10	11	3	3	2	209	209	56.5	54.5	58.9	14.8	15.3	9.6	1097600000	321840000	598110016	63017000
CAAX prenyl protease	EHI_075660	C4M998	C4M998	25.6901	23.4619	23.2273	19	19	19	0.0148968	0.0677167	5.12641			3	3	1	1	0	0	0	3	8.7	8.7	8.7	48.607	0	14.522	75510000	18	6	3	1	1	0	0	0	416	416	8.7	3.6	3.6	0	0	0	54136000	11554000	9819800	0
Alpha-1,3/1,6-mannosyltransferase ALG2	EHI_001990	C4M5L3;B1N4A4	C4M5L3;B1N4A4	27.1595	23.7108	26.1125	19	19	19	0.0149433	0.0677401	6.66095			4	4	1	4	0	0	0	4	12.3	12.3	12.3	45.54	0	31.315	236190000	23	12	4	1	4	0	0	0	397	NaN	12.3	2.3	12.3	0	0	0	149910000	13730000	72551000	0
AIG1 family protein, putative (Fragment); AIG1 family protein, putative	EHI_109120	B1N607;B1N5Z9	B1N607;B1N5Z9	27.1708	25.3412	25.6736	19	21.424	21.034	0.0150089	0.0677872	5.84985			4	4	3	2	0	1	1	4	23.6	23.6	23.6	23.415	0	47.771	252080000	15	16	4	3	2	0	1	1	203	NaN	23.6	16.3	12.3	0	6.9	6.9	151090000	42506000	53521000	0
Rab family GTPase	EHI_161030	C4M2S0	C4M2S0	26.7239	25.7592	26.3852	21.9406	19	19	0.015075	0.0677872	5.81914			8	5	6	6	1	0	0	8	34.4	34.4	34.4	23.824	0	20.905	259310000	15	20	5	6	6	1	0	0	212	212	26.9	27.8	29.2	5.2	0	0	110840000	56792000	87648000	4025100
40S ribosomal protein S12	EHI_186720	C4LVN9	C4LVN9	25.4406	22.7151	24.2262	19	19	19	0.0150776	0.0677872	5.1273			1	1	1	1	0	0	0	1	56.8	15.9	15.9	14.81	0	28.134	72050000	8	6	1	1	1	0	0	0	132	132	56.8	43.2	41.7	0	0	0	45540000	6885200	19625000	0
D-hydantoinase, putative	EHI_024420	C4M0I4	C4M0I4	24.1641	26.6667	23.7742	19	19	19	0.0152568	0.0684056	5.86834			4	3	2	1	0	0	0	4	12.2	12.2	12.2	50.614	0	5.2028	139680000	21	9	3	2	1	0	0	0	460	460	6.7	7.8	2.4	0	0	0	18798000	106530000	14347000	0
Rab family GTPase	EHI_128110	A0A8U0WQ17	A0A8U0WQ17	23.3202	21.4892	22.454	19	19	19	0.0152995	0.0684099	3.42111			1	1	1	1	0	0	0	1	5.9	5.9	5.9	26.032	0	43.575	19162000	12	1	1	1	1	0	0	0	238	238	5.9	5.9	5.9	0	0	0	10473000	2943600	5745500	0
Niemann-Pick C1 protein, putative	EHI_080220	C4M8X7	C4M8X7	25.2288	23.2595	22.8249	19	19	19	0.0154184	0.0687542	4.7711			3	3	2	1	0	0	0	3	2.4	2.4	2.4	152.57	0	6.1607	56793000	41	6	3	2	1	0	0	0	1339	1339	2.4	1.9	1.1	0	0	0	39322000	10042000	7429900	0
PIG-P domain-containing protein	EHI_126130	C4LVZ8	C4LVZ8	25.0576	22.5391	23.5444	19	19	19	0.0154904	0.0688882	4.71367			1	1	1	1	0	0	0	1	6.1	6.1	6.1	18.864	0.00071891	1.9101	53249000	6	4	1	1	1	0	0	0	165	165	6.1	6.1	6.1	0	0	0	34920000	6094500	12234000	0
I/LWEQ domain protein	EHI_003930	C4M9B6	C4M9B6	25.1486	25.1176	26.1223	23.3382	22.6671	22.2436	0.0155486	0.0689178	2.46013			4	1	2	4	1	1	1	4	5	5	5	114.98	0	17.262	168870000	60	15	1	2	4	1	1	1	995	995	1.1	2.4	5	1.1	1.1	1.1	37195000	36404000	73044000	10605000
Protein SEY1 homolog 2	EHI_054180	C4M6U3;B1N586	C4M6U3	29.1158	27.0132	27.6889	24.078	23.7326	21.9954	0.015581	0.0689178	4.03402			15	13	9	11	3	2	1	15	19.9	19.9	19.9	96.599	0	120.09	969410000	50	49	13	9	11	3	2	1	825	NaN	16	10.5	15.5	4.2	3.3	1.7	581760000	135450000	216370000	17709000
40S ribosomal protein S16, putative	EHI_008010	B1N316;C4M2R7;C4LZP6	B1N316;C4M2R7;C4LZP6	30.4501	29.8315	31.2236	27.9976	27.7747	27.2648	0.0156634	0.0689429	2.61563			7	6	4	7	4	4	4	7	45.2	45.2	45.2	17.383	0	152.71	5588600000	9	69	6	4	7	4	4	4	157	NaN	42	30.6	45.2	30.6	29.9	30.6	1466899968	955379968	2507500032	267980000
40S ribosomal protein S25	EHI_074800	C4M9F4;C4LY50	C4M9F4;C4LY50	29.4418	28.9166	29.5898	27.5104	26.4732	26.0524	0.0156707	0.0689429	2.32427			5	4	4	5	4	2	2	5	27.7	27.7	27.7	14.758	0	23.168	2397800000	6	47	4	4	5	4	2	2	137	NaN	24.1	24.1	27.7	24.1	12.4	12.4	729209984	506710016	807990016	191180000
Sec61 alpha subunit, putative	EHI_164500	C4M1T1;C4LUZ7	C4M1T1	30.7668	30.0227	28.4153	24.5476	25.469	21.8801	0.0160267	0.0702639	4.72663			8	8	8	8	3	2	1	8	25.9	25.9	25.9	37.495	0	323.31	3350600000	8	114	8	8	8	3	2	1	344	NaN	25.9	25.9	25.9	11	7.8	5.8	1826899968	1090800000	357980000	24522000
Protein SCAI	EHI_186790	C4LVP6	C4LVP6	24.6709	24.9736	25.6941	23.1068	22.3311	19	0.0161148	0.0702639	2.39395			3	2	2	2	2	1	0	3	3	3	3	65.101	0.00075873	2.2306	128250000	27	9	2	2	2	2	1	0	559	559	1.8	2.9	2.9	2.9	1.3	0	26710000	32947000	54286000	9032900
G protein-coupled receptor 1	EHI_025100	A0A8U0WPY7	A0A8U0WPY7	26.9431	26.1789	26.8311	25.1796	24.8099	23.4358	0.0161439	0.0702639	1.65627			10	6	6	8	4	4	3	10	16.9	16.9	16.9	56.93	0	119.77	403150000	19	53	6	6	8	4	4	3	491	491	14.7	12.8	15.1	10.4	11.4	8.6	129030000	75968000	119390000	38004000
Memo family protein	EHI_024510	C4M0J3	C4M0J3	25.2878	25.826	26.3009	19	21.779	19	0.0161563	0.0702639	5.41543			5	3	4	4	0	2	1	5	26.4	26.4	26.4	31.244	0	32.741	186720000	17	21	3	4	4	0	2	1	284	284	18	18.3	22.9	0	9.9	3.9	40962000	59486000	82673000	0
Calpain large subunit domain III containing protein	EHI_146330	C4M9C0	C4M9C0	24.6258	24.0951	24.6432	19	21.2758	19	0.0161851	0.0702639	4.31682			3	1	1	2	0	1	0	3	6.1	6.1	6.1	67.855	0	14.811	72550000	34	5	1	1	2	0	1	0	591	591	2	2	2.2	0	3.9	0	25889000	17920000	26203000	0
Protein tyrosine kinase domain-containing protein	EHI_101280	C4M8B8;C4MA43	C4M8B8	26.4767	25.6612	26.1674	21.1571	23.1616	19	0.0164349	0.0711601	3.94242			9	6	5	7	1	2	0	8	9.9	9.3	8.5	133.91	0	24.861	233540000	61	23	5	4	6	1	2	0	1196	NaN	7.2	5	8.2	1.3	2.2	0	93383000	53064000	75368000	2338400
Portal protein	EHI_151280	C4LSH1	C4LSH1	25.0725	22.4477	24.4774	19	19	19	0.0165087	0.0712875	4.9992			2	2	2	2	0	0	0	2	4.7	4.7	4.7	68.778	0	12.619	64362000	37	14	2	2	2	0	0	0	599	599	4.7	4.7	4.7	0	0	0	35284000	5720400	23358000	0
Cell surface protease gp63, putative	EHI_200230	C4M7M4	C4M7M4	27.958	26.0391	27.1041	23.6173	23.4435	19	0.0165512	0.0712875	3.50333			7	6	6	7	2	2	0	7	14.5	14.5	14.5	71.563	0	250.48	498230000	23	30	6	6	7	2	2	0	643	643	12.6	11.4	14.5	3.9	3.9	0	260740000	68952000	144260000	12868000
CYRIA/CYRIB Rac1 binding domain-containing protein	EHI_131000	C4LXG8	C4LXG8	25.0252	22.4159	23.7258	19	19	19	0.0166716	0.0716181	4.72227			3	3	1	2	0	0	0	3	18.4	18.4	18.4	33.634	0	51.193	53613000	13	7	3	1	2	0	0	0	299	299	18.4	5.4	11.4	0	0	0	34145000	5595600	13873000	0
Serine/threonine-protein phosphatase	EHI_117570	C4M672	C4M672	26.7705	24.4646	23.5788	19	19	19	0.0168709	0.0722851	5.93795			5	5	2	2	0	0	0	5	13.4	13.4	13.4	48.94	0	52.873	150160000	16	9	5	2	2	0	0	0	433	433	13.4	6	7.2	0	0	0	114480000	23151000	12529000	0
Calcium-transporting ATPase	EHI_016480	C4M3X0	C4M3X0	28.3931	26.4208	26.6729	23.2358	21.7294	19	0.0173247	0.0740359	4.67968			10	9	7	8	2	2	0	10	29.9	12	12	119.13	0	82.716	562690000	50	41	9	7	8	2	2	0	1072	1072	28.1	20	21.5	2.9	4.5	0.8	352510016	89838000	106990000	9878100
Chitin synthase export chaperone	EHI_126900	C4LWW6	C4LWW6	29.198	27.7733	27.7196	24.8499	25.3698	23.5249	0.0175133	0.0744297	3.12049			4	4	3	3	2	2	1	4	15.5	15.5	15.5	30.542	0	9.9445	1151900000	9	23	4	3	3	2	2	1	265	265	15.5	11.7	9.8	6	6	2.6	615849984	229400000	221020000	30238000
Uncharacterized protein	EHI_155310	C4LW84	C4LW84	30.4408	29.5561	28.3413	24.8933	25.8197	24.6331	0.0175491	0.0744297	4.08957			7	6	5	7	2	2	2	7	24.8	24.8	24.8	24.429	0	86.243	2703200000	7	44	6	5	7	2	2	2	214	214	23.4	21	24.8	9.3	9.8	9.3	1457399936	789360000	340070016	31162000
TBC1 domain family member 23	EHI_126040	C4LVY9	C4LVY9	26.7479	25.5482	25.3972	19	21.7387	19	0.0175529	0.0744297	5.52843			3	3	2	2	1	1	0	3	4.4	4.4	4.4	79.949	0	20.591	209460000	31	15	3	2	2	1	1	0	703	703	4.4	3.1	3.1	1.8	1.8	0	112700000	49066000	44191000	0
MmpL efflux pump, putative	EHI_030870	C4M1F4	C4M1F4	25.9304	23.7456	23.0872	19	19	19	0.0178412	0.075403	5.2544			6	5	3	1	0	0	0	6	8.1	8.1	8.1	96.144	0	10.117	86923000	29	10	5	3	1	0	0	0	843	843	6.5	4.3	1.1	0	0	0	63947000	14065000	8911400	0
Grainin 2	EHI_167310;EHI_111	A0A8U0WPU5;B1N3T3	A0A8U0WPU5;B1N3T3	31.4003	29.366	29.145	25.3449	25.7228	25.3103	0.0178743	0.075403	4.43662			9	9	5	6	2	3	2	9	33.3	33.3	33.3	24.065	0	76.468	4259500000	12	51	9	5	6	2	3	2	213	NaN	33.3	25.4	32.9	10.3	14.1	10.3	2834299904	691889984	593649984	42615000
Protein kinase, putative	EHI_188110	C4M185	C4M185	27.2101	26.0701	26.8118	24.1185	24.7048	24.0919	0.0179289	0.0754392	2.28565			5	5	5	4	1	1	1	5	6.9	6.9	6.9	107.71	0	15.523	406950000	43	33	5	5	4	1	1	1	951	951	6.9	6.9	4.9	1.2	1.2	1.2	155260000	70451000	117800000	18214000
Uncharacterized protein	EHI_113590	B1N4L3	B1N4L3	26.3965	24.3735	25.876	19	21.2556	19	0.0180234	0.0755151	5.42088			5	5	3	5	1	1	0	5	13.7	13.7	13.7	50.467	0	33.688	174150000	21	23	5	3	5	1	1	0	437	437	13.7	9.4	13.7	3	3	0	88333000	21735000	61583000	0
Papain family cysteine protease domain containing protein	EHI_050800	C4LTV0	C4LTV0	24.9242	24.07	24.9467	22.9055	22.8714	22.5773	0.018039	0.0755151	1.75851			5	4	2	1	1	1	1	5	15	15	15	64.5	0	21.872	103580000	32	12	4	2	1	1	1	1	567	567	13.2	3.7	1.9	1.9	1.9	1.9	31838000	17611000	32338000	7857000
70 kDa heat shock protein, putative	EHI_199590	C4M770	C4M770	29.947	27.4972	28.6274	24.5275	24.1605	23.9387	0.0181815	0.0759184	4.34653			21	18	8	14	3	3	4	21	35.1	35.1	35.1	73.493	0	173.74	1698100000	31	77	18	8	14	3	3	4	661	661	31.5	13	21	5.4	5.4	6.7	1035000000	189450000	414670016	24184000
Gal/GalNAc lectin subunit Igl2	EHI_065330	C4M6L0	C4M6L0	31.5407	30.8406	30.54	29.0299	29.2473	28.3471	0.0183176	0.075984	1.83514			43	34	36	26	13	15	12	43	62.5	46.9	46.9	120.39	0	323.31	8134900000	63	288	34	36	26	13	15	12	1105	1105	56.2	50.3	45.3	30.5	31	31	3124000000	1922800000	1561200000	548129984
C2 domain containing protein	EHI_069950	C4MA60	C4MA60	25.1329	25.7162	25.0008	21.6105	23.102	19	0.0183244	0.075984	2.92707			8	4	4	6	2	1	0	8	25.2	25.2	25.2	36.66	0	14.521	137700000	16	20	4	4	6	2	1	0	322	322	14.3	11.2	20.8	5.9	3.4	0	36793000	55125000	33574000	3201900
Vacular protein sorting 33A, putative	EHI_135210	C4M107	C4M107	28.3623	26.1308	26.8491	23.0747	23.1894	22.305	0.0183885	0.075984	3.98201			8	8	4	6	1	1	1	8	9.6	9.6	9.6	113.38	0	106.42	563010000	51	35	8	4	6	1	1	1	995	995	9.6	5.3	6.8	1.3	1.3	1.3	345060000	73477000	120890000	8834300
Protein kinase, putative	EHI_184540	C4M6T0;B1N5V3;B1N383;C4LTL5;C4LU62;C4LVK8;C4LVF1;C4LT25;C4M420	C4M6T0	25.2986	25.1209	24.2689	22.2975	22.9782	19	0.0184126	0.075984	2.25827			6	3	3	3	1	1	1	6	6.4	5.6	5.6	120.75	0	14.835	111390000	59	17	3	3	3	1	1	1	1055	NaN	3.5	3.1	3.8	0.9	0.9	0.9	41270000	36487000	20215000	5154900
VWFA domain-containing protein	EHI_081290	C4M5B4	C4M5B4	24.7315	23.3853	23.5849	21.1419	21.4659	19	0.0184288	0.075984	2.59669			2	2	1	1	1	1	0	2	4.8	4.8	4.8	81.538	0	4.6349	56607000	42	10	2	1	1	1	1	0	713	713	4.8	1.7	1.7	1.7	1.7	0	27857000	10957000	12582000	2313900
Transmembrane protein	EHI_137920	C4LZF3	C4LZF3	27.4919	26.6822	27.194	25.7375	25.6416	24.5902	0.0186143	0.0763724	1.43318			8	8	6	6	3	2	3	8	17.5	17.5	17.5	56.271	0	50.899	583530000	21	37	8	6	6	3	2	3	496	496	17.5	11.9	13.1	7.3	4.6	6.2	188750000	107680000	153540000	55944000
Choline transporter-like protein	EHI_101290	C4M8B4	C4M8B4	25.4319	24.4393	24.2213	22.5324	22.3126	22.7842	0.0186161	0.0763724	2.27498			2	2	2	2	1	1	2	2	3.6	3.6	3.6	53.964	0	5.0997	106070000	11	10	2	2	2	1	1	2	476	476	3.6	3.6	3.6	1.9	1.7	3.6	45264000	22749000	19558000	6066400
Protein phosphatase, putative	EHI_110320	C4LU84	C4LU84	25.3495	22.7566	23.2434	19	19	19	0.0186848	0.0764631	4.78319			3	3	1	1	0	0	0	3	10.8	10.8	10.8	36.607	0	5.888	59769000	19	5	3	1	1	0	0	0	334	334	10.8	2.7	2.7	0	0	0	42752000	7086500	9930500	0
Chorein N-terminal domain-containing protein	EHI_115340	C4M8E5	C4M8E5	23.1416	21.5963	23.7337	19	19	19	0.0187689	0.0766165	3.82383			3	2	1	3	0	0	0	3	4	4	4	121.86	0	6.1759	26373000	47	6	2	1	3	0	0	0	1049	1049	2.7	1.3	4	0	0	0	9253500	3170500	13949000	0
Importin, putative	EHI_001760	C4M5I7	C4M5I7	27.4713	26.6327	26.6619	25.3463	24.9718	23.1789	0.0190379	0.0773242	1.76287			13	12	10	7	6	5	3	13	13.7	13.7	13.7	111.29	0	50.441	481370000	47	50	12	10	7	6	5	3	980	980	12.9	10.3	7.7	6.8	5.5	3.7	186070000	104050000	106180000	42659000
Uncharacterized protein	EHI_082540	C4M6A5;B1N3T2	C4M6A5	28.0082	25.2207	24.1884	19	19	19	0.0190759	0.0773242	6.80577			8	8	3	2	0	0	0	8	8.4	8.4	8.4	125.73	0	66.476	328180000	30	15	8	3	2	0	0	0	1124	NaN	8.4	3.5	2.2	0	0	0	269960000	39101000	19118000	0
Rab B GTPase	EHI_181240	A0A8U0WNX9	A0A8U0WNX9	25.7519	25.5716	26.5291	24.257	24.1065	22.6903	0.0191474	0.0773242	1.76918			5	3	4	5	2	3	1	5	30.7	30.7	30.7	21.378	0	20.979	248100000	13	19	3	4	5	2	3	1	192	192	22.9	27.6	30.7	12	20.3	7.3	56505000	49869000	96843000	20048000
Rap-GAP domain-containing protein	EHI_172500	C4MA51	C4MA51	24.3863	22.3476	22.3608	19	19	19	0.0191971	0.0773242	4.03155			4	3	2	1	0	0	0	4	3.9	3.9	3.9	143.81	0	7.9156	32651000	63	5	3	2	1	0	0	0	1245	1245	2.9	2	1	0	0	0	21928000	5337100	5385900	0
peptidylprolyl isomerase	EHI_051870	B1N302;C4LUU9	B1N302;C4LUU9	26.7275	23.6038	27.3454	19	19	25.6354	0.0191985	0.0773242	6.89223			2	2	1	2	0	0	1	2	5.8	5.8	5.8	39.405	0.00076336	2.2779	346520000	15	10	2	1	2	0	0	1	379	NaN	5.8	3.4	5.8	0	0	2.4	111120000	12748000	170520000	0
Antigenic protein P1	EHI_015380	P20302	P20302	27.9483	26.4492	27.8445	24.5859	23.6378	22.8096	0.0192568	0.0773242	3.30213			15	13	6	11	3	2	1	15	17.9	17.9	17.9	125.43	0	95.166	637200000	55	46	13	6	11	3	2	1	1113	1113	15.6	7.4	14.4	4.4	2.8	1.4	258990000	91622000	241000000	25183000
ATP-binding cassette, putative	EHI_095820	C4M3D9;C4M558	C4M3D9;C4M558	30.4566	28.4103	28.4315	24.276	25.2248	24.5089	0.0192722	0.0773242	4.34906			21	21	13	12	3	3	4	20	20.1	20.1	19.1	151.65	0	196.14	2275600000	60	98	20	13	12	3	3	4	1337	NaN	20.1	12.3	11.7	2.2	2.2	3.1	1473500032	356740000	362030016	20315000
Aminopeptidase	EHI_008380	C4M0L4	C4M0L4	29.4477	28.051	29.3013	25.5134	23.3973	22.9869	0.0193581	0.0773644	4.478			25	19	16	21	2	1	1	25	32.5	32.5	32.5	94.718	0	126.72	1739200000	42	87	19	16	21	2	1	1	827	827	25.9	21.3	28.3	2.1	1	1	732220032	278089984	661580032	47896000
Type A flavoprotein, putative	EHI_064530	C4M0C2	C4M0C2	23.1231	21.6627	21.4745	19	19	19	0.0194352	0.0773644	3.08676			2	1	1	2	0	0	0	2	6.3	3.6	3.6	47.063	0	4.8391	15369000	20	4	1	1	2	0	0	0	415	415	5.1	5.1	6.3	2.7	2.7	2.7	9135700	3319800	2913900	0
Short chain dehydrogenase family protein	EHI_158310	C4M2F0	C4M2F0	27.7879	24.3022	24.6377	19	19	19	0.0194494	0.0773644	6.57594			11	11	5	4	0	0	0	11	40.8	40.8	40.8	35.622	0	56.896	278530000	19	22	11	5	4	0	0	0	311	311	40.8	17.4	14.5	0	0	0	231740000	20687000	26102000	0
DUF4832 domain-containing protein	EHI_119270	C4M4X6	C4M4X6	24.8227	22.1623	23.7253	19	19	19	0.0194708	0.0773644	4.57009			2	2	1	2	0	0	0	2	6.4	6.4	6.4	51.931	0	16.767	48236000	24	7	2	1	2	0	0	0	451	451	6.4	2.2	6.4	0	0	0	29674000	4693800	13868000	0
Major facilitator superfamily protein	EHI_155610	C4LWB2	C4LWB2	26.9407	23.61	24.327	19	19	19	0.0197646	0.0783423	5.95921			2	2	2	2	0	0	0	2	6	6	6	53.831	0	36.446	162660000	11	12	2	2	2	0	0	0	467	467	6	6	6	0	0	0	128810000	12803000	21045000	0
Eukaryotic translation initiation factor 2 alpha subunit, putative	EHI_005100	C4M0A4	C4M0A4	26.1405	25.3592	24.8641	21.7148	19	19	0.0198633	0.0785437	5.09715			2	2	2	1	1	0	0	2	8.7	8.7	8.7	33.505	0	13.193	150990000	17	7	2	2	1	1	0	0	299	299	8.7	8.7	4.3	4.3	0	0	73971000	43040000	30537000	3442000
Dynamin-like protein	EHI_052740	C4M3R5	C4M3R5	23.6953	22.4747	25.3177	19	19	19	0.0199748	0.0787947	4.82925			3	2	1	3	0	0	0	3	4.5	4.5	4.5	74.596	0	2.5011	61233000	37	6	2	1	3	0	0	0	663	663	2.7	1.4	4.5	0	0	0	13583000	5828600	41821000	0
Uncharacterized protein	EHI_049060	C4MAS3	C4MAS3	29.9553	28.9887	27.4189	23.983	24.6605	23.629	0.0201887	0.0794018	4.46591			2	2	2	2	1	1	1	2	21.1	21.1	21.1	13.492	0	56.167	1809200000	4	37	2	2	2	1	1	1	123	123	21.1	21.1	21.1	12.2	12.2	12.2	1041000000	532689984	179440000	16581000
Dopey N-terminal domain-containing protein	EHI_133960	C4M1M5	C4M1M5	22.4291	23.3112	23.8138	20.4854	19	19	0.0202255	0.0794018	3.442			5	2	2	2	1	0	0	5	3.4	3.4	3.4	179.68	0	7.7161	32270000	74	7	2	2	2	1	0	0	1546	1546	1.7	1	1.5	0.6	0	0	5647300	10408000	14746000	1468000
Uncharacterized protein	EHI_006150	C4M2P9	C4M2P9	21.6089	22.6358	21.0115	19	19	19	0.0205611	0.0802717	2.75209			1	1	1	1	0	0	0	1	3.2	3.2	3.2	43.627	0	6.9504	11830000	20	4	1	1	1	0	0	0	371	371	3.2	3.2	3.2	0	0	0	3198300	6517300	2114000	0
Glycosyl transferase family 28 C-terminal domain-containing protein	EHI_049660	C4LUG7	C4LUG7	27.6292	26.2015	25.5987	23.1317	22.6748	19	0.0206047	0.0802717	3.57327			6	6	3	3	1	1	0	6	24.6	24.6	24.6	38.609	0	77.714	351470000	18	23	6	3	3	1	1	0	345	345	24.6	11	11.9	3.5	3.5	0	207600000	77170000	50813000	9190300
PRA1 family protein	EHI_179870	C4M638	C4M638	24.4687	21.9241	23.7052	19	19	19	0.0206627	0.0802717	4.36602			1	1	1	1	0	0	0	1	9.8	9.8	9.8	19.367	0	3.9444	40873000	9	5	1	1	1	0	0	0	164	164	9.8	9.8	9.8	0	0	0	23217000	3979400	13677000	0
Actin, putative	EHI_008780	C4M0P2	C4M0P2	22.9426	21.113	22.469	19	19	19	0.0206678	0.0802717	3.17486			1	1	1	1	0	0	0	1	1.6	1.6	1.6	84.789	0	27.823	16135000	43	1	1	1	1	0	0	0	763	763	1.6	1.6	1.6	0	0	0	8061300	2268000	5805600	0
Ras family GTPase	EHI_196530	C4MAI1	C4MAI1	26.1473	24.1522	24.2707	19	20.9004	19	0.0206916	0.0802717	4.90657			5	4	3	3	0	1	0	5	39.2	39.2	39.2	23.824	0	11.391	115170000	13	14	4	3	3	0	1	0	212	212	32.5	28.8	26.4	0	7.5	0	74325000	18644000	20240000	0
Proteasome regulatory subunit, putative	EHI_179970	C4M648	C4M648	23.7777	22.1554	24.9055	19	19	19	0.0207795	0.0804202	4.61286			3	1	2	3	0	0	0	3	8.2	8.2	8.2	54.278	0	13.123	50480000	30	8	1	2	3	0	0	0	473	473	3.8	6.6	8.2	0	0	0	14381000	4671200	31428000	0
Rab family GTPase	EHI_122730	A0A8U0WNZ1	A0A8U0WNZ1	24.1182	23.4677	24.5521	19	21.1257	19	0.0208279	0.0804202	3.98316			3	3	2	3	0	1	1	3	19.2	19.2	19.2	23.328	0	24.174	56697000	13	13	3	2	3	0	1	1	203	203	19.2	12.3	19.2	0	5.4	6.9	18210000	11601000	24599000	0
Adaptor protein (AP) family protein	EHI_013040	B1N2V8;B1N2V9	B1N2V8	28.3437	26.6147	27.4223	24.6695	24.4668	24.027	0.0210548	0.0811053	2.89208			13	12	5	8	3	2	2	13	15.2	15.2	15.2	119.52	0	102.01	690230000	52	45	12	5	8	3	2	2	1091	NaN	11.7	5.3	10.3	3.3	2.6	2.6	340640000	102760000	179860000	26684000
VASt domain-containing protein	EHI_024350	C4M0I0	C4M0I0	30.1105	27.9611	28.6487	24.7118	25.4519	24.467	0.0213696	0.0818552	3.82494			16	14	10	15	2	2	2	16	25	25	25	68.982	0	78.619	1937900000	29	67	14	10	15	2	2	2	604	604	22.5	18.4	23.5	4.1	4.1	4.1	1159200000	261300000	420830016	27478000
Translocon-associated protein subunit alpha	EHI_083600	C4M944	C4M944	26.8443	24.4059	23.3784	19	19	19	0.0213898	0.0818552	5.87619			1	1	1	1	0	0	0	1	7.5	7.5	7.5	23.613	0	26.08	153620000	3	4	1	1	1	0	0	0	212	212	7.5	7.5	7.5	0	0	0	120490000	22228000	10904000	0
Galactokinase, putative	EHI_094100	C4LYJ7	C4LYJ7	26.4235	24.869	26.6151	21.7868	19	19	0.0214406	0.0818552	5.57581			4	4	3	4	1	0	0	4	9.3	9.3	9.3	43.432	0	7.1701	227060000	20	16	4	3	4	1	0	0	389	389	9.3	7.2	9.3	2.3	0	0	90002000	30642000	102790000	3618000
Mon2/Sec7/BIG1-like dimerisation and cyclophilin-binding domain-containing protein	EHI_169940	C4M1B6	C4M1B6	22.8774	21.7866	24.1777	19	19	19	0.0214489	0.0818552	3.94724			2	1	1	2	0	0	0	2	1.8	1.8	1.8	138.48	0	3.3388	30299000	63	4	1	1	2	0	0	0	1221	1221	0.9	0.9	1.8	0	0	0	7705400	3617600	18976000	0
Ras-GAP domain-containing protein	EHI_174140	C4M262	C4M262	24.915	24.0888	25.2527	22.5479	22.8734	19	0.0215806	0.0821217	2.04151			5	4	3	5	2	2	0	5	5	5	5	137.73	0	43.597	103270000	79	17	4	3	5	2	2	0	1231	1231	4.1	2.7	5	2.4	2.4	0	31634000	17842000	39978000	6131700
Calcium-transporting ATPase	EHI_030830	C4M1F1	C4M1F1	31.3044	29.2367	29.1834	25.8068	26.0343	21.8524	0.0217102	0.0821217	3.98761			34	33	24	21	4	5	1	32	33.3	33.3	32.6	113.94	0	323.31	4025400000	52	169	31	23	20	4	5	1	1026	1026	32.7	25	23.7	5.1	6.7	2	2651899904	632600000	609649984	58697000
Polyadenylate-binding protein, putative	EHI_198750	C4LWS1	C4LWS1	24.571	21.9713	24.1257	19	19	19	0.0218098	0.0821217	4.55603			4	3	1	2	0	0	0	4	8.2	8.2	8.2	60.23	0	3.5578	47340000	28	5	3	1	2	0	0	0	524	524	5.7	2.5	4.8	0	0	0	24924000	4111800	18305000	0
Papain family cysteine protease domain containing protein	EHI_138460	C4M3I8	C4M3I8	26.1856	25.4514	26.2233	24.546	24.0065	20.8149	0.0218328	0.0821217	1.67719			7	4	4	6	4	3	1	7	12.8	12.8	12.8	65.517	0	34.235	243740000	29	35	4	4	6	4	3	1	572	572	7	7	12.8	9.3	7	2.3	76323000	45882000	78345000	24496000
Uncharacterized protein	EHI_044580	C4LT80	C4LT80	19	19	19	24.5515	21.9543	19	0.0218461	0.0821217	-4.25288			2	0	0	0	2	1	0	2	11.3	11.3	11.3	35.616	0	9.3037	28652000	19	3	0	0	0	2	1	0	318	318	0	0	0	11.3	5	0	0	0	0	24589000
Elongation factor 2	EHI_189490	C4M4N3;B1N3D6;B1N306	C4M4N3;B1N3D6;B1N306	28.9183	27.2703	28.2021	25.2072	25.5367	25.1923	0.0218701	0.0821217	2.75832			17	12	11	11	3	3	4	17	21.5	21.5	21.5	93.4	0	75.719	1103800000	43	64	12	11	11	3	3	4	841	NaN	16.8	13.6	14.7	3.3	3.1	5.2	507329984	161880000	308800000	38737000
Antigen	EHI_004370	C4LYQ0	C4LYQ0	29.2705	27.9668	29.0663	23.4044	19	23.094	0.0218713	0.0821217	7.56563			8	8	7	6	1	0	1	8	24.5	24.5	24.5	39.236	0	162.59	1492100000	23	38	8	7	6	1	0	1	335	335	24.5	21.2	19.1	4.2	0	4.2	647590016	262320000	562120000	11103000
Diaphanous protein, homolog 2, putative	EHI_197550	C4LVH1	C4LVH1	24.1056	22.255	25.1908	19	19	19	0.0219781	0.0821217	4.85046			2	1	1	2	1	0	0	2	3.1	3.1	3.1	110.77	0	75.766	61355000	47	13	1	1	2	1	0	0	986	986	1.6	1.6	3.1	1.6	0	0	18051000	5005200	38299000	0
Proteasome regulatory subunit, putative	EHI_103850	C4LVM7;B1N4C1	C4LVM7	26.0475	25.6911	25.8216	22.1999	19	19	0.022064	0.0821217	5.25339			7	4	5	5	1	0	0	7	26.5	26.5	26.5	43.809	0	52.986	187650000	20	24	4	5	5	1	0	0	377	NaN	17.2	17.2	20.4	3.2	0	0	69354000	54173000	59301000	4817800
Phosphotransferase	EHI_098560	A0A8U0WP47;A0A8U0WP42	A0A8U0WP47;A0A8U0WP42	26.5602	25.0857	26.213	23.479	23.3877	22.8514	0.0220668	0.0821217	2.51959			8	6	4	7	1	1	1	8	18.4	18.4	18.4	49.419	0	32.947	242580000	27	22	6	4	7	1	1	1	445	NaN	16.4	10.6	16.6	2.7	2.7	2.7	98952000	35607000	77785000	11692000
CCR4-not transcription complex	EHI_178720	C4LUT6	C4LUT6	23.9784	23.1766	23.62	21.0376	19	19	0.0220693	0.0821217	3.57285			1	1	1	1	1	0	0	1	0.6	0.6	0.6	227.9	0	5.2147	41054000	106	1	1	1	1	1	0	0	1999	1999	0.6	0.6	0.6	0.6	0	0	16528000	9481200	12892000	2152600
Thioredoxin, putative	EHI_133970	C4M1M6	C4M1M6	29.0126	27.0153	27.6682	24.5588	24.6119	23.7411	0.022252	0.0825183	3.31336			8	7	5	4	2	3	2	8	24.5	24.5	24.5	40.112	0	58.849	954870000	20	27	7	5	4	2	3	2	339	339	22.4	13.9	11.8	5.3	8	5.3	541569984	135650000	213280000	24713000
D-3-phosphoglycerate dehydrogenase, putative; D-phosphoglycerate dehydrogenase (Fragment)	EHI_060860	A0A8U0WPL1;B1N5E3	A0A8U0WPL1;B1N5E3	27.9738	26.4226	27.2257	24.8134	24.2944	22.4614	0.0224103	0.0825183	2.65349			12	11	6	9	4	4	3	12	40.1	40.1	40.1	33.469	0	44.623	566340000	19	55	11	6	9	4	4	3	299	NaN	36.8	23.4	32.4	17.1	17.1	13	263610000	89951000	156950000	29484000
Rab family GTPase	EHI_005010	A0A8U0WPH3	A0A8U0WPH3	22.129	22.6098	24.5094	19	19	19	0.0224144	0.0825183	4.08273			4	1	2	4	0	0	0	4	28.4	24.2	24.2	23.832	0	14.419	34869000	15	7	1	2	4	0	0	0	211	211	8.1	17.1	24.2	0	0	0	4586700	6400500	23882000	0
SH2-protein kinase domain containing protein	EHI_055990	C4M7B9	C4M7B9	26.9361	25.0304	25.9759	19	21.8498	19	0.0224574	0.0825183	5.55589			7	6	4	4	1	1	0	7	15.2	15.2	15.2	55.615	0	39.73	232450000	23	24	6	4	4	1	1	0	495	495	12.9	9.5	9.5	2.2	2.2	0	128400000	34269000	65995000	0
Coatomer subunit gamma	EHI_012500	A0A8U0WP21	A0A8U0WP21	29.1296	27.5611	27.155	24.7085	24.304	19	0.0224675	0.0825183	3.44235			17	15	12	10	4	2	0	17	20.2	20.2	20.2	97.184	0	100.99	982950000	45	57	15	12	10	4	2	0	848	848	18.3	14.7	12.4	5.2	2.7	0	587350016	198030000	149440000	27416000
Chaperonin 1 60 kDa	EHI_178570	A0A8U0WP12	A0A8U0WP12	22.6133	21.2249	23.2582	19	19	19	0.0224993	0.0825183	3.36548			1	1	1	1	0	0	0	1	3.2	3.2	3.2	56.839	0	6.5099	18900000	37	3	1	1	1	0	0	0	536	536	3.2	3.2	3.2	0	0	0	6416100	2451000	10033000	0
Phospholipid/glycerol acyltransferase domain-containing protein	EHI_163570	C4M3T8	C4M3T8	28.9491	26.3425	26.892	23.115	21.7485	19	0.0225904	0.0825183	4.96283			6	6	2	3	1	1	1	6	21.3	21.3	21.3	43.398	0	57.635	740500000	17	19	6	2	3	1	1	1	380	380	21.3	7.6	12.1	4.7	4.7	4.7	518270016	85092000	124540000	9084400
Long-chain-fatty-acid--CoA ligase, putative	EHI_147010	C4M8T2	C4M8T2	32.003	30.2467	30.6925	24.2598	27.0158	25.6547	0.0226241	0.0825183	5.34287			23	20	15	16	2	4	3	23	31.7	31.7	31.7	77.3	0	141.73	7521600000	31	107	20	15	16	2	4	3	682	682	29.2	19.9	22.4	2.9	4.4	3.1	4303799808	1274000000	1735200000	20088000
Ubiquitin-conjugating enzyme family protein	EHI_164400	C4M1S2	C4M1S2	23.6697	22.6946	23.7697	21.546	21.0495	21.3757	0.0226388	0.0825183	2.08024			2	2	1	1	1	1	1	2	18	18	18	16.989	0	3.5832	42387000	6	8	2	1	1	1	1	1	150	150	18	10	10	10	10	10	13344000	6788200	14302000	3061900
Thioredoxin domain-containing protein	EHI_072060	C4M611	C4M611	25.3107	22.2893	24.2738	19	19	19	0.0226787	0.0825183	4.95794			3	3	1	3	0	0	0	3	6.9	6.9	6.9	57.945	0	11.248	67028000	25	8	3	1	3	0	0	0	495	495	6.9	2	6.9	0	0	0	41619000	5125700	20283000	0
Carbohydrate kinase PfkB domain-containing protein	EHI_149860	C4M9D1	C4M9D1	27.2708	26.086	25.0542	21.7919	19	19	0.0228571	0.0828591	5.741			7	6	5	4	1	0	0	7	8.8	8.8	8.8	75.756	0	14.846	271630000	36	19	6	5	4	1	0	0	691	691	8.5	7.4	5.2	1.7	0	0	161930000	71229000	34838000	3631000
AP-3 complex subunit delta	EHI_164810	C4M1X4;B1N4M4	C4M1X4	28.9018	26.9416	28.13	24.8809	24.724	24.4875	0.0228734	0.0828591	3.18868			17	15	10	12	6	3	3	17	18.8	18.8	18.8	115.62	0	154.8	1006300000	50	93	15	10	12	6	3	3	1030	NaN	16.4	11.4	12.7	6.3	3.6	3.1	501540000	128890000	293750016	30895000
Rab family GTPase	EHI_065790	A0A8U0WP79	A0A8U0WP79	24.1646	21.7413	23.886	19	19	19	0.0229374	0.082908	4.26399			3	3	1	2	0	0	0	3	17.4	17.4	17.4	23.085	0	9.0672	37814000	14	6	3	1	2	0	0	0	207	207	17.4	5.8	12.1	0	0	0	18805000	3505800	15503000	0
Rab family GTPase	EHI_169280	A0A8U0WP57	A0A8U0WP57	29.7156	28.5646	29.5522	27.2238	27.3307	26.766	0.0232363	0.0838039	2.00024			13	13	6	7	3	4	4	12	72.9	72.9	68.1	22.65	0	75.606	2505500000	13	79	12	5	6	3	3	3	207	207	72.9	35.7	39.1	13.5	18.4	18.4	881660032	397000000	787219968	156740000
Vesicle transport protein	EHI_000640	C4LZB5	C4LZB5	24.1624	22.0433	22.1715	19	19	19	0.0233963	0.0838544	3.7924			1	1	1	1	0	0	0	1	16	16	16	18.756	0	10.118	27822000	5	5	1	1	1	0	0	0	163	163	16	16	16	0	0	0	18776000	4322200	4723700	0
Dedicator of cytokinesis protein	EHI_151250	C4LSG8	C4LSG8	24.5804	22.4081	25.5975	19	19	19	0.0234546	0.0838544	5.19532			5	3	1	3	0	0	0	5	1.9	1.9	1.9	296.65	0	2.5739	81423000	139	7	3	1	3	0	0	0	2537	2537	1.2	0.3	1	0	0	0	25086000	5565400	50772000	0
Purine nucleoside phosphorylase, putative	EHI_200080	C4M7M1	C4M7M1	26.1596	26.4556	28.1076	23.6885	22.6309	22.6047	0.0234573	0.0838544	3.74789			8	5	4	8	1	1	1	8	29.2	29.2	29.2	34.754	0	39.12	482600000	19	25	5	4	8	1	1	1	318	318	23	14.5	29.2	3.8	3.8	3.8	74957000	92033000	289220000	13519000
Palmitoyltransferase	EHI_027690	C4M1V5	C4M1V5	24.7391	22.5677	22.3447	19	19	19	0.023466	0.0838544	4.21716			1	1	1	1	0	0	0	1	4.8	4.8	4.8	35.44	0	14.382	39546000	10	10	1	1	1	0	0	0	310	310	4.8	4.8	4.8	0	0	0	28003000	6216800	5326200	0
Vps16 N-terminal domain-containing protein	EHI_177440	C4LY47	C4LY47	26.5044	24.4497	25.7888	22.2953	22.2154	19	0.0235058	0.0838544	3.32564			6	4	2	5	1	1	1	6	8	8	8	107.87	0	28.978	186100000	47	20	4	2	5	1	1	1	932	932	5.5	2.8	7.2	1.8	1.8	1.8	95198000	22914000	57970000	5147000
60S ribosomal protein L9, putative	EHI_193080	C4M9B0;C4LVZ9	C4M9B0;C4LVZ9	26.0214	25.9274	26.9574	24.5413	24.4145	22.5737	0.023557	0.0838548	1.82413			3	2	3	3	2	2	1	3	13.2	13.2	13.2	22.287	0	10.485	315260000	12	21	2	3	3	2	2	1	197	NaN	9.6	13.2	13.2	7.6	9.1	3.6	68114000	63814000	130310000	24416000
Tetraspanin family protein	EHI_133990	C4M1M8	C4M1M8	29.4901	27.5793	27.4465	24.1501	24.7227	25.0544	0.0238444	0.0846941	3.73558			4	4	3	2	1	1	2	4	20.5	20.5	20.5	22.608	0	10.754	1218600000	7	20	4	3	2	1	1	2	200	200	20.5	12	8.5	5	5	8.5	754049984	200540000	182900000	18617000
SH3 domain protein	EHI_187770	C4M9I2	C4M9I2	24.46	22.195	22.3435	19	19	19	0.0240949	0.0853991	3.99951			2	2	1	1	0	0	0	2	6.1	6.1	6.1	40.219	0	3.1293	33202000	19	4	2	1	1	0	0	0	359	359	6.1	2.8	2.8	0	0	0	23078000	4801400	5321800	0
Uncharacterized protein	EHI_020330	C4M7U5	C4M7U5	27.1024	25.8283	26.5148	24.4671	23.5439	23.3357	0.0243172	0.0860011	2.47634			4	3	2	2	2	1	1	4	19.4	19.4	19.4	22.192	0	10.158	345560000	5	12	3	2	2	2	1	1	196	196	9.7	15.3	6.1	15.3	5.6	5.6	144090000	59579000	95884000	23191000
V-type proton ATPase subunit C	EHI_092600	C4LV20	C4LV20	23.5136	21.6058	24.0844	19	19	19	0.0245597	0.0864159	4.06795			2	1	1	1	0	1	0	2	5	5	5	44.088	0	4.1906	32956000	22	4	1	1	1	0	1	0	378	378	2.9	2.9	2.1	0	2.9	0	11976000	3191500	17788000	0
Lysozyme 1	LYS1	Q27650	Q27650	28.0674	27.7899	28.6423	26.8431	26.7491	25.5213	0.0245612	0.0864159	1.37043			3	3	3	3	3	3	3	3	18.5	18.5	18.5	23.561	0	150.6	1213600000	10	37	3	3	3	3	3	3	211	211	18.5	18.5	18.5	18.5	18.5	18.5	281270016	232060000	418980000	120390000
Transmembrane protein tmp21, putative	EHI_058320	A0A8U0WP96	A0A8U0WP96	24.899	22.2895	22.8009	19	19	19	0.0246184	0.0864159	4.32982			2	2	1	1	0	0	0	2	12	12	12	23.518	0	2.7647	43720000	9	3	2	1	1	0	0	0	208	208	12	5.8	6.2	0	0	0	31286000	5126300	7307500	0
Actin-related protein 2/3 complex subunit 3	EHI_172960	C4M6H6;O15604	C4M6H6;O15604	25.1507	22.352	23.097	19	19	19	0.0246929	0.0864159	4.53321			3	3	1	2	0	0	0	3	20.3	20.3	20.3	20.482	0	33.195	51573000	10	9	3	1	2	0	0	0	177	NaN	20.3	8.5	14.7	0	0	0	37248000	5353300	8971900	0
Uncharacterized protein	EHI_155250	C4LW78	C4LW78	27.9388	26.0728	26.9342	24.1637	23.1416	21.8007	0.0246978	0.0864159	3.32929			9	7	4	6	3	1	1	9	22.5	22.5	22.5	41.204	0	12.501	487790000	21	27	7	4	6	3	1	1	351	351	17.4	10.3	15.1	8	3.1	3.1	257280000	70584000	128230000	18793000
Rab family GTPase	EHI_046390	A0A8U0WQ41	A0A8U0WQ41	26.3815	22.7664	25.5406	19	19	19	0.024919	0.0868352	5.89618			1	1	1	1	0	0	0	1	36.2	11.7	11.7	23.78	0	53.701	143360000	15	6	1	1	1	0	0	0	213	213	36.2	31.5	31.5	9.9	5.2	0	87423000	7134800	48807000	0
Heat shock protein 70 family	EHI_001950	C4M5K9	C4M5K9	28.1496	26.5086	27.864	24.8091	24.7366	24.3606	0.0249234	0.0868352	2.7346			7	5	5	4	3	1	1	7	11.5	11.5	11.5	73.98	0	64.549	716420000	33	37	5	5	4	3	1	1	660	660	8	9.5	6.5	6.1	1.8	1.8	297769984	95476000	244280000	29395000
Exosome complex exonuclease, putative	EHI_000580	C4LZA9	C4LZA9	23.9542	21.5816	23.759	19	19	19	0.0250314	0.0868826	4.09825			2	1	1	1	0	0	0	2	6.4	6.4	6.4	29.302	0	2.5909	33588000	16	3	1	1	1	0	0	0	265	265	2.6	3.8	2.6	0	0	0	16253000	3138300	14196000	0
Triosephosphate isomerase	TPI	O02611	O02611	28.239	25.2514	26.6053	20.7282	22.2401	22.4511	0.0250429	0.0868826	5.21441			9	9	3	4	1	1	2	9	49.8	49.8	49.8	28.098	0	111.36	471270000	18	22	9	3	4	1	1	2	261	261	49.8	13	24.9	5.4	6.5	11.9	316809984	39943000	102090000	1737100
Multidrug resistance protein, putative	EHI_100320	C4M0V2	C4M0V2	30.3383	28.4557	28.3866	24.9701	25.8108	24.4321	0.0253179	0.0876513	3.66977			27	26	16	15	4	4	3	27	18.4	18.4	18.4	181.51	0	244.1	2191000000	61	122	26	16	15	4	4	3	1600	1600	17.8	10.9	9.8	2.6	2.6	2	1357500032	368140000	350929984	32866000
Glycosyltransferase, putative	EHI_085980	C4M353	C4M353	26.2361	25.522	25.9972	22.5314	24.064	22.6983	0.0254952	0.0880792	2.62078			9	8	5	4	2	2	1	9	7.3	7.3	7.3	155.09	0	62.608	224610000	64	23	8	5	4	2	2	1	1375	1375	6.7	3.9	3.1	1.7	1.7	0.7	79042000	48183000	66980000	6062000
Large ribosomal subunit protein uL4; 60S ribosomal protein L4, putative	RPL4	O15594;C4LZU1;C4LZA2;B1N384	O15594;C4LZU1;C4LZA2;B1N384	27.5248	26.251	27.7241	19	22.7518	21.9279	0.0256002	0.0882563	6.29075			7	6	4	5	1	1	1	7	11.8	11.8	11.8	47.396	0	29.903	505730000	22	20	6	4	5	1	1	1	431	NaN	11.6	9.7	9.5	3.5	2.1	2.1	193100000	79863000	221710000	0
Malate dehydrogenase	EHI_152670	C4LSV1	C4LSV1	26.8501	25.448	26.8775	23.5766	21.8177	19	0.0257789	0.0886858	3.69472			4	3	4	4	3	1	0	1	17.8	17.8	3.1	39.21	0	61.502	306250000	21	25	1	1	1	1	0	0	354	354	13.3	17.8	17.8	14.4	6.8	0	120970000	45773000	123290000	12510000
3-ketoacyl-CoA synthase	EHI_092190	C4LUY4	C4LUY4	27.4035	24.7737	23.4256	19	19	19	0.0260444	0.0892663	6.20093			5	5	2	2	0	0	0	5	13.8	9.4	9.4	55.867	0	104.43	217470000	27	11	5	2	2	0	0	0	487	487	13.8	9.4	9.4	0	0	0	177530000	28683000	11267000	0
Enolase 1	ENO	P51555	P51555	31.3419	29.7293	30.3389	28.11	27.4871	26.8364	0.0260621	0.0892663	2.67149			16	16	12	15	9	8	7	16	44.3	44.3	44.3	47.327	0	323.31	5567700000	20	148	16	12	15	9	8	7	436	436	44.3	32.8	39.9	28	24.8	22.7	2721799936	890040000	1358099968	289710016
Cysteine proteinase, putative	EHI_050570	C4LTT0	C4LTT0	27.4287	25.9968	27.0767	23.6173	24.5923	23.5596	0.0261108	0.0892663	2.72929			9	6	4	8	1	1	1	9	37.3	37.3	37.3	33.686	0	88.21	439700000	14	28	6	4	8	1	1	1	311	311	21.9	23.8	26.7	4.5	4.5	4.5	180660000	66960000	141550000	12868000
Uncharacterized protein	EHI_158120	C4M2D1	C4M2D1	28.7713	27.2689	27.9278	25.8122	25.2872	24.4403	0.0261822	0.0893242	2.43966			8	7	3	4	1	1	1	8	16.4	16.4	16.4	58.702	0	126.87	997880000	20	29	7	3	4	1	1	1	517	517	14.9	6.4	8.5	1.9	1.9	1.9	458180000	161720000	255340000	58919000
Uncharacterized protein	EHI_035430	C4LXX4	C4LXX4	26.0071	24.3321	25.8827	22.7097	21.9218	21.8805	0.0263407	0.0896787	3.09153			5	4	3	5	1	1	1	5	3.3	3.3	3.3	208.23	0	30.104	165120000	96	17	4	3	5	1	1	1	1801	1801	2.8	1.7	3.3	0.8	0.4	0.4	67438000	21120000	61870000	6859700
Importin beta, putative	EHI_036520	C4M8F5	C4M8F5	25.3018	25.6596	26.2141	19	22.2283	22.5452	0.0264922	0.0899159	5.11103			7	4	5	5	0	1	2	7	9.4	9.4	9.4	94.527	0	19.599	183250000	37	16	4	5	5	0	1	2	843	843	5.3	6.5	7.1	0	1.3	2.6	41363000	53004000	77845000	0
Zinc transporter, putative	EHI_103680	C4LVL2	C4LVL2	24.4646	26.5443	22.8602	19	19	19	0.02652	0.0899159	5.62301			2	2	2	1	0	0	0	2	4	4	4	30.053	0	16.813	128630000	4	8	2	2	1	0	0	0	275	275	4	4	4	0	0	0	23151000	97866000	7613700	0
Actin-related protein 2/3 complex subunit 4	EHI_030820	C4LSV0	C4LSV0	29.2375	26.6319	27.1395	22.0913	23.6308	19	0.0265953	0.0899852	4.80858			9	9	6	5	1	3	0	9	52.9	52.9	52.9	21.541	0	101.18	902220000	11	46	9	6	5	1	3	0	191	191	52.9	31.9	31.9	8.9	23.6	0	632929984	103990000	147840000	4468200
AP complex subunit beta	EHI_023600	A0A8U0WPZ3	A0A8U0WPZ3	29.8205	29.0121	30.0285	28.0453	27.9082	27.3006	0.0266942	0.0901343	1.64367			20	16	13	19	10	9	8	20	30.5	30.5	30.5	80.915	0	323.31	3279000000	37	161	16	13	19	10	9	8	724	724	26.2	21.3	29.6	17.5	16.6	14	948150016	541409984	1095200000	276990016
PRA1 family protein	EHI_199660	C4M779	C4M779	35.1075	33.414	33.5542	30.924	31.3111	30.1618	0.026844	0.0901371	2.90766			13	13	12	11	8	8	8	13	35.2	35.2	35.2	21.743	0	323.31	66978000000	5	264	13	12	11	8	8	8	193	193	35.2	35.2	34.7	30.6	30.6	26.9	37017001984	11445000192	12613000192	2037299968
Phosphatidylserine synthase, putative	EHI_009800	C4M0P6	C4M0P6	29.2213	26.2819	26.5472	19	22.0961	19	0.0268482	0.0901371	6.80209			10	10	7	4	0	1	0	10	23.8	23.8	23.8	52.737	0	79.546	810000000	23	35	10	7	4	0	1	0	442	442	23.8	17.6	10.9	0	2.7	0	625870016	81592000	98060000	0
GOLD domain-containing protein	EHI_186880	C4LVQ5	C4LVQ5	27.0723	24.0503	23.4644	19	19	19	0.0268993	0.0901371	5.86233			1	1	1	1	0	0	0	1	6.7	6.7	6.7	26.112	0	2.3117	170070000	11	5	1	1	1	0	0	0	225	225	6.7	6.7	6.7	0	0	0	141120000	17372000	11574000	0
Pore-forming peptide amoebapore C	EHI_118270	Q24825	Q24825	26.6	24.9384	25.6449	19	22.0233	19	0.0270471	0.0901371	5.21615			4	3	2	3	1	1	1	4	48.5	48.5	48.5	10.855	0	14.012	190610000	8	15	3	2	3	1	1	1	101	101	37.6	25.7	36.6	10.9	10.9	10.9	101720000	32153000	52468000	0
Uncharacterized protein	EHI_138330	C4M3H6	C4M3H6	26.2532	22.8496	23.8065	19	19	19	0.0270527	0.0901371	5.30307			6	6	3	3	0	0	0	6	8.2	8.2	8.2	101.99	0	14.684	102210000	43	14	6	3	3	0	0	0	888	888	8.2	4.2	4.2	0	0	0	79982000	7558000	14671000	0
Uncharacterized protein	EHI_120910	C4M7Q7	C4M7Q7	23.971	21.4686	22.9536	19	19	19	0.0271336	0.0901371	3.79771			1	1	1	1	0	0	0	1	4.7	4.7	4.7	32.272	0	10.623	27468000	11	3	1	1	1	0	0	0	276	276	4.7	4.7	4.7	0	0	0	16443000	2901900	8123100	0
Serine palmitoyltransferase, putative	EHI_152280	C4LSR6	C4LSR6	27.2054	25.5215	26.3375	19	22.3622	19	0.0271372	0.0901371	5.67368			7	7	4	4	0	1	0	7	6.3	6.3	6.3	98.116	0	8.7003	293100000	42	17	7	4	4	0	1	0	883	883	6.3	4.4	3.6	0	0.8	0	154750000	48164000	84795000	0
40S ribosomal protein S24, putative	EHI_078300	C4M549;C4LT49	C4M549;C4LT49	24.831	22.0108	24.7902	19	19	19	0.0271511	0.0901371	4.87731			4	3	1	3	0	0	0	4	26.4	26.4	26.4	16.26	0	27.545	63084000	4	8	3	1	3	0	0	0	140	NaN	21.4	9.3	25	0	0	0	29845000	4225700	29013000	0
Importin alpha, putative	EHI_044650	C4LT86	C4LT86	23.3911	24.2445	23.8207	21.2848	19	19	0.0272041	0.0901371	3.67639			4	2	3	2	1	0	0	4	9.4	9.4	9.4	56.415	0	15.918	48247000	30	7	2	3	2	1	0	0	488	488	5.7	6.6	4.3	2.9	0	0	11001000	19875000	14817000	2554800
CXXC-rich protein	EHI_093710	C4LYG2	C4LYG2	25.2869	23.0564	22.3858	19	19	19	0.0272444	0.0901371	4.57634			4	4	2	2	0	0	0	4	10.9	10.9	10.9	52.926	0	6.8663	55139000	25	7	4	2	2	0	0	0	466	466	10.9	5.6	4.3	0	0	0	40936000	8722900	5480100	0
Nuclease domain containing protein	EHI_101240	C4M8B5	C4M8B5	28.9435	27.6282	28.2951	26.0356	26.4246	26.132	0.0275101	0.0905704	2.05884			18	17	15	12	4	7	7	18	24.8	24.8	24.8	95.613	0	61.147	1285500000	49	74	17	15	12	4	7	7	843	843	22.8	20.3	15.3	5.2	9.6	8.8	516249984	207450000	329360000	68784000
VHS domain-containing protein	EHI_194470	C4LZV9	C4LZV9	25.2069	24.4712	24.6922	21.8191	19	19	0.0275105	0.0905704	4.38054			2	1	2	1	1	0	0	2	6.6	6.6	6.6	44.738	0	10.971	92796000	24	5	1	2	1	1	0	0	395	395	3.3	6.6	3.3	3.3	0	0	38730000	23257000	27108000	3700100
40S ribosomal protein S20, putative	EHI_140170	C4M466	C4M466	27.3012	26.4354	27.2771	25.6044	25.3553	22.5438	0.0275996	0.0905704	1.52472			3	3	3	2	2	1	1	2	24.6	24.6	16.1	13.162	0	5.0966	518830000	7	15	2	2	2	2	1	1	118	118	24.6	24.6	16.1	16.1	7.6	8.5	165380000	90751000	162640000	51014000
UDENN domain-containing protein	EHI_120870	C4M7Q3	C4M7Q3	23.8338	21.5363	22.2242	19	19	19	0.0276816	0.0905704	3.53144			1	1	1	1	0	0	0	1	2	2	2	72.974	0.00073099	2.0169	22893000	33	2	1	1	1	0	0	0	646	646	2	2	2	0	0	0	14952000	3041400	4899400	0
Uncharacterized protein	EHI_045110	C4LTC4	C4LTC4	21.4629	20.4276	21.8992	19	19	19	0.0276953	0.0905704	2.26323			1	1	1	1	0	0	0	1	3.1	3.1	3.1	55.999	0.0063171	1.1308	8212100	19	3	1	1	1	0	0	0	491	491	3.1	3.1	3.1	0	0	0	2890600	1410300	3911200	0
60S ribosomal protein L18a	EHI_035600	C4LXZ0	C4LXZ0	26.5652	25.7545	27.7624	19	22.4413	19	0.0277065	0.0905704	5.97339			7	3	1	7	0	1	0	7	41.6	41.6	41.6	20.093	0	44.122	389280000	10	15	3	1	7	0	1	0	173	173	21.4	5.8	41.6	0	5.8	0	99294000	56608000	227680000	0
Pore-forming peptide amoebapore A	EHI_159480	P34095	P34095	26.8695	25.1411	25.1486	19	21.911	19	0.0279191	0.0910841	5.26423			4	4	3	3	0	1	0	4	45.9	45.9	45.9	10.504	0	15.127	200750000	5	11	4	3	3	0	1	0	98	98	45.9	28.6	28.6	0	11.2	0	122610000	37003000	37195000	0
RhoGAP domain containing protein	EHI_153150	C4LSA7	C4LSA7	23.0165	22.8903	21.0311	19	19	19	0.0280427	0.0913058	3.31264			2	1	1	1	0	0	0	2	3.6	3.6	3.6	62.805	0.01026	0.93409	18402000	27	2	1	1	1	0	0	0	548	548	2.4	1.3	2.4	0	0	0	8485200	7774300	2142900	0
Protein kinase, putative	EHI_011510	C4M9I7	C4M9I7	25.5179	23.1306	22.5094	19	19	19	0.0282594	0.0916	4.71932			3	3	2	1	0	0	0	3	6.6	6.6	6.6	48.214	0	8.6769	63201000	26	7	3	2	1	0	0	0	424	424	6.6	5	2.1	0	0	0	48047000	9183200	5970600	0
proton-translocating NAD(P)(+) transhydrogenase	EHI_014030	A0A8U0WPM4	A0A8U0WPM4	32.2205	30.7554	31.2148	28.8974	29.2925	28.2495	0.0282777	0.0916	2.30193			40	34	27	29	11	9	7	5	40.6	40.6	6	117.63	0	323.31	10786000000	47	251	4	4	4	0	3	1	1083	1083	34.8	28.5	29.6	9.9	10	7.9	5004100096	1812599936	2492199936	500009984
Uncharacterized protein	EHI_068510	C4LU42	C4LU42	30.2277	29.2956	30.7129	28.0246	27.8058	27.6824	0.0283006	0.0916	2.16352			31	24	20	24	9	9	12	31	44.5	44.5	44.5	82.506	0	275.82	4399300000	38	172	24	20	24	9	9	12	744	744	34.8	28.9	36.2	15.1	15.5	19.5	1257299968	658969984	1760000000	273060000
Cortexillin II, putative	EHI_103430	C4LVI7	C4LVI7	26.1809	24.7211	25.4543	23.4162	22.821	19	0.0285324	0.0921686	2.33344			5	5	2	3	1	1	1	5	10.3	10.3	10.3	67.641	0	39.326	168300000	37	17	5	2	3	1	1	1	584	584	10.3	3.1	5.1	2.4	2.4	2.4	76072000	27656000	45972000	11194000
Rho family GTPase	EHI_052150	C4M855;C4MA80	C4M855	24.6349	21.822	24.4229	19	19	19	0.0287039	0.0923733	4.62659			2	2	1	2	0	0	0	2	15.9	10.1	10.1	21.341	0	2.5782	52252000	10	5	2	1	2	0	0	0	189	NaN	15.9	12.2	15.9	5.8	5.8	5.8	26052000	3707400	22492000	0
Lysine--tRNA ligase	EHI_047810	C4M7X2	C4M7X2	26.731	25.3576	26.9846	22.4057	19	19	0.0287083	0.0923733	5.65487			7	6	4	6	2	0	0	7	12.4	10.1	10.1	86.533	0	17.417	292730000	44	26	6	4	6	2	0	0	769	769	10.5	5.9	8.7	3.3	0	0	111390000	42992000	132790000	5556400
Cysteine proteinase, putative	EHI_168240	A0A8U0WQ39	A0A8U0WQ39	29.9998	29.4487	29.9158	28.7221	28.9642	28.328	0.0288778	0.0925404	0.944949			15	12	11	13	9	12	9	15	49.4	49.4	49.4	34.759	0	323.31	4122700000	17	223	12	11	13	9	12	9	318	318	48.7	43.4	49.1	38.4	41.2	38.4	1073600000	732720000	1012899968	442800000
G protein alpha subunit, putative	EHI_140350	C4M483	C4M483	28.9182	28.0299	28.8256	21.6661	25.0742	23.3376	0.0289133	0.0925404	5.22106			11	10	9	10	1	4	2	11	39.4	39.4	39.4	39.946	0	188.08	1306300000	21	73	10	9	10	1	4	2	358	358	31	31.3	31	4.2	16.2	7	507289984	274060000	475729984	3327800
Rab family GTPase	EHI_004380	A0A8U0WPR3	A0A8U0WPR3	25.3045	25.5232	22.2645	19	19	19	0.0289295	0.0925404	5.36405			6	2	5	1	0	0	0	5	28.6	28.6	24.1	22.953	0	8.5252	94699000	14	10	2	4	1	0	0	0	203	203	10.8	21.2	7.4	0	0	0	41438000	48223000	5038200	0
Replication factor C subunit	EHI_099840	C4M6G4	C4M6G4	28.3613	25.9375	25.6361	19	21.9464	22.6214	0.0290136	0.092629	6.17173			6	5	5	4	0	1	2	6	25.7	25.7	25.7	29.282	0	45.763	471720000	11	22	5	5	4	0	1	2	253	253	20.6	22.1	17	0	5.9	9.9	344820000	64262000	52148000	0
Sec7 domain protein	EHI_024590	C4M0K1	C4M0K1	26.264	24.4192	25.1418	21.8623	22.7112	19	0.0294642	0.0938851	2.98826			9	7	4	5	1	2	0	9	6.9	6.9	6.9	165.99	0	16.241	150720000	82	19	7	4	5	1	2	0	1445	1445	4.8	2.4	3.5	0.6	1.1	0	80587000	22434000	37021000	3812500
Beta-hexosaminidase subunit beta	HEXB	Q86M34	Q86M34	33.1797	31.4962	31.4984	29.3446	29.0155	28.6429	0.0295333	0.0939227	2.87806			27	25	23	23	17	16	15	27	52.6	52.6	52.6	64.371	0	323.31	17436000000	29	241	25	23	23	17	16	15	565	565	51.2	38.6	46.4	30.4	29.2	27.3	9729200128	3029100032	3033700096	681710016
RhoGAP domain containing protein	EHI_182930	C4LV70	C4LV70	25.8516	22.3108	24.3325	19	19	19	0.029902	0.0949112	5.16498			4	3	1	2	0	0	0	4	6.2	6.2	6.2	108.38	0	10.653	86879000	56	7	3	1	2	0	0	0	934	934	4.7	1.2	3	0	0	0	60551000	5202500	21126000	0
Polyadenylate-binding protein, putative	EHI_033250	C4M6Y2	C4M6Y2	25.0945	23.5323	24.2104	22.1207	21.7813	21.0126	0.0299826	0.0949836	2.32804			3	2	2	3	1	1	1	3	7.4	7.4	7.4	58.787	0	15.737	77648000	29	12	2	2	3	1	1	1	514	514	4.7	4.7	7.4	2.7	2.7	2.7	35825000	12132000	19411000	4560300
Uncharacterized protein	EHI_015420	B1N399	B1N399	28.2944	23.8091	25.053	19	19	23.0637	0.0300637	0.0950568	6.71883			13	12	2	5	0	1	2	13	21.5	21.5	21.5	85.153	0	72.075	387470000	30	31	12	2	5	0	1	2	757	757	19.6	3.7	9.1	0	1.1	3.6	329200000	14698000	34810000	0
Uncharacterized protein	EHI_173440	C4M6I1	C4M6I1	23.1921	21.0282	22.792	19	19	19	0.0301426	0.0951232	3.33745			2	2	1	1	0	0	0	2	3	3	3	113.81	0.00071124	1.8297	18985000	40	4	2	1	1	0	0	0	996	996	3	0.9	0.9	0	0	0	9583600	2138500	7262500	0
Replication factor A protein 1, putative	EHI_062980	C4M8G6	C4M8G6	25.7133	25.0345	26.4753	21.5309	23.3192	22.1259	0.0304544	0.0958155	3.31597			4	2	2	4	1	2	1	4	9.9	9.9	9.9	66.689	0	33.67	200750000	30	14	2	2	4	1	2	1	588	588	3.9	3.9	9.9	2.4	3.9	1.5	55014000	34366000	93298000	3030100
Uncharacterized protein	EHI_196400	C4M9R2	C4M9R2	27.8483	25.6119	26.5292	22.5668	23.6078	22.6123	0.0304788	0.0958155	3.5758			5	5	3	4	2	3	2	5	10.6	10.6	10.6	68.198	0	45.571	415180000	21	29	5	3	4	2	3	2	597	597	10.6	6.4	9.4	5.2	6.4	4.4	241650000	51279000	96845000	6212800
Vesicle-associated membrane protein, putative	EHI_170630	A0A8U0WP16	A0A8U0WP16	25.9747	22.3633	24.2886	19	19	19	0.0305815	0.0959547	5.20883			2	2	1	1	0	0	0	2	41.6	41.6	41.6	11.611	0	64.873	91829000	3	8	2	1	1	0	0	0	101	101	41.6	23.8	23.8	0	0	0	65941000	5395300	20492000	0
AP complex subunit sigma	EHI_103550	A0A8U0WPQ7	A0A8U0WPQ7	26.7943	25.57	26.094	24.1592	22.7318	22.1402	0.0307847	0.0964077	2.70727			5	5	3	4	2	1	1	5	33.7	33.7	33.7	18.749	0	11.86	268140000	8	18	5	3	4	2	1	1	163	163	33.7	17.2	26.4	12.3	6.1	6.1	116380000	49814000	71625000	18734000
Dedicator of cytokinesis protein	EHI_170180	C4M1E0	C4M1E0	23.5299	23.7501	24.5933	22.3327	22.3592	22.2667	0.030901	0.0965877	1.61183			2	1	1	2	1	1	1	2	0.7	0.7	0.7	270.42	0.0013396	1.4192	67240000	132	13	1	1	2	1	1	1	2322	2322	0.3	0.3	0.7	0.3	0.3	0.3	12112000	14109000	25311000	5282100
Lipid phosphate phosphatase, putative	EHI_136980	C4M5X2	C4M5X2	27.1749	25.4525	24.7357	22.0891	22.2873	22.0951	0.0311483	0.097115	3.5995			3	3	1	1	1	1	1	3	16.6	16.6	16.6	29.068	0	52.108	239430000	6	12	3	1	1	1	1	1	259	259	16.6	5	5	5	5	5	151520000	45915000	27938000	4461500
Coronin	EHI_082080	C4M5U0	C4M5U0	24.3869	21.6073	22.9288	19	19	19	0.0312526	0.097115	3.97435			3	3	1	1	0	0	0	3	4.6	4.6	4.6	101.85	0	12.717	33117000	47	5	3	1	1	0	0	0	896	896	4.6	1.9	1.9	0	0	0	21938000	3194900	7984600	0
Autophagy protein 5	EHI_022880	C4LUK1	C4LUK1	23.6452	23.1709	23.334	21.2365	19	19	0.0313737	0.097115	3.26508			1	1	1	1	1	0	0	1	4.9	4.9	4.9	33.479	0	11.654	35608000	11	6	1	1	1	1	0	0	288	288	4.9	4.9	4.9	4.9	0	0	13119000	9443500	10574000	2470800
Adenylyl cyclase-associated protein	EHI_136150	C4M295;B1N3T9	C4M295	28.2517	27.6867	28.6881	25.9661	26.7737	26.6849	0.0313763	0.097115	1.83893			11	6	6	8	3	5	7	11	24.7	24.7	24.7	53.215	0	194.67	1256300000	33	66	6	6	8	3	5	7	478	NaN	14.6	14.4	19.7	7.9	11.9	16.5	319609984	216030000	432480000	65551000
Endoplasmic reticulum-Golgi intermediate compartment protein 3	EHI_182970	C4LV74	C4LV74	23.0918	21.0775	21.6814	19	19	19	0.0313806	0.097115	2.95025			1	1	1	1	0	0	0	1	2.8	2.8	2.8	41.156	0.010065	0.84436	14516000	16	2	1	1	1	0	0	0	361	361	2.8	2.8	2.8	0	0	0	8939900	2212900	3363200	0
Uncharacterized protein	EHI_157130	C4MAP7	C4MAP7	25.9787	24.6853	24.7855	22.7404	23.2282	19	0.0314878	0.097115	2.16553			1	1	1	1	1	1	0	1	1.2	1.2	1.2	101.44	0	5.6335	138860000	11	11	1	1	1	1	1	0	893	893	1.2	1.2	1.2	1.2	1.2	0	66126000	26979000	28919000	7007300
Ribosomal protein L15	EHI_020300	C4M7U2	C4M7U2	27.7378	26.5382	28.6201	24.5757	24.7206	23.8934	0.031533	0.097115	2.98391			5	3	2	5	2	2	1	5	22.9	22.9	22.9	23.891	0	38.415	802090000	8	16	3	2	5	2	2	1	205	205	15.6	11.2	22.9	11.2	11.2	4.4	223820000	97453000	412580000	25004000
Ras GTPase-activating protein, putative	EHI_105250	C4M129	C4M129	26.9046	24.9331	27.2053	22.1951	19	19	0.0315431	0.097115	5.75012			7	6	3	6	1	1	0	7	12.4	12.4	12.4	82.399	0	22.259	317200000	44	16	6	3	6	1	1	0	727	727	11	4.7	10.7	1.2	2.1	0	125630000	32034000	154740000	4801600
Importin N-terminal domain-containing protein	EHI_049470	C4LUE8	C4LUE8	23.2554	21.3666	21.4603	19	19	19	0.0316665	0.0973121	3.02741			2	2	1	1	0	0	0	2	2.3	2.3	2.3	104.87	0.00073746	2.0624	15602000	40	5	2	1	1	0	0	0	928	928	2.3	1.2	1.2	0	0	0	10013000	2703800	2885300	0
Uncharacterized protein	EHI_124350	C4LZH3	C4LZH3	24.5441	21.9068	22.4355	19	19	19	0.0317922	0.0974954	3.96214			1	1	1	1	0	0	0	1	5.3	5.3	5.3	26.424	0	6.6163	34067000	9	4	1	1	1	0	0	0	227	227	5.3	5.3	5.3	0	0	0	24463000	3932000	5672200	0
Amino acid transporter, putative	EHI_194200	C4LZT5	C4LZT5	26.64	25.1298	24.2985	22.0995	21.8329	19	0.0318449	0.0974954	3.38992			4	4	3	2	1	1	0	4	7.6	7.6	7.6	59.758	0	6.7068	170160000	14	25	4	3	2	1	1	0	537	537	7.6	6.1	4.3	2.6	2.6	0	104580000	36713000	20633000	4493700
Uncharacterized protein	EHI_021220	C4M037	C4M037	24.6267	21.8502	22.6519	19	19	19	0.0320929	0.0979693	4.04293			2	2	1	1	0	0	0	2	2.7	2.7	2.7	99.663	0	5.0639	36275000	36	3	2	1	1	0	0	0	881	881	2.7	1.7	1.7	0	0	0	25904000	3780700	6590200	0
AVL9/DENND6 domain-containing protein	EHI_078290	C4M548	C4M548	21.5084	21.5189	23.4477	19	19	19	0.0321191	0.0979693	3.15834			2	1	1	2	1	0	0	2	5	5	5	56.979	0	4.3515	17429000	26	5	1	1	2	1	0	0	500	500	2.6	2.4	5	2.6	0	0	2983200	3004900	11441000	0
Proteasome regulatory subunit, putative	EHI_136180	C4M298	C4M298	27.8988	27.3118	28.0841	25.4761	23.1827	21.8454	0.0321796	0.0979717	3.43547			9	5	6	8	5	2	2	9	18.1	18.1	18.1	52.279	0	19.106	761350000	27	36	5	6	8	5	2	2	448	448	9.8	11.8	16.1	9.8	4.5	5.1	250250000	166600000	284540000	46674000
leucine--tRNA ligase	EHI_161970	C4M6P0	C4M6P0	23.3286	22.7177	23.95	21.0122	19	19	0.0323907	0.0984316	3.32602			2	2	2	1	1	0	0	2	3	3	3	122.46	0	11.143	35754000	59	7	2	2	1	1	0	0	1072	1072	3	3	1.6	1.6	0	0	10534000	6897900	16206000	2114900
Cation-transporting P-typeATPase, putative	EHI_065670	C4LZY3	C4LZY3	30.9985	29.0755	29.5096	27.0508	26.9912	26.4969	0.0325176	0.0984978	2.8402			27	25	12	13	4	3	4	27	27.5	27.5	27.5	125.83	0	95.526	3842400000	56	103	25	12	13	4	3	4	1118	1118	26.1	9.7	11.8	3	2.3	3	2145200000	565729984	764320000	139030000
Dolichyl-diphosphooligosaccharide--protein glycosyltransferase 48 kDa subunit	EHI_183010	C4LV77	C4LV77	26.9884	25.5905	25.8481	22.5227	19	19	0.0325374	0.0984978	5.38097			5	5	3	4	1	0	0	5	16.8	16.8	16.8	43.412	0	47.534	250090000	17	15	5	3	4	1	0	0	376	376	16.8	9.8	14.1	2.7	0	0	133140000	50525000	60404000	6025800
Uncharacterized protein	EHI_065710	C4LZY7	C4LZY7	28.5964	26.247	24.3117	20.7431	19	19	0.0325925	0.0984978	6.51348			13	13	7	3	1	0	0	13	76.4	76.4	76.4	22.031	0	139.18	508080000	13	32	13	7	3	1	0	0	195	195	76.4	40.5	17.4	7.2	0	0	405860000	79643000	20823000	1755100
Uncharacterized protein	EHI_167090	B1N310	B1N310	28.7971	28.3944	27.8059	26.3718	26.9933	25.9223	0.0327056	0.0985521	1.64992			3	2	2	2	1	1	1	3	13.4	13.4	13.4	27.296	0	70.168	1337900000	4	31	2	2	2	1	1	1	246	246	11.4	11.4	10.2	8.1	8.1	8.1	466449984	352820000	234650000	86835000
Glyceraldehyde-3-phosphate dehydrogenase	EHI_008200	C4LVR9	C4LVR9	31.5182	30.8804	32.189	29.6802	29.7029	29.4616	0.0327306	0.0985521	1.83761			16	11	12	15	8	9	8	16	45.5	45.5	45.5	36.013	0	160.53	12422000000	19	147	11	12	15	8	9	8	334	334	26	36.5	43.1	20.4	23.4	19.2	3075500032	1976599936	4896000000	860249984
60S ribosomal protein L10, putative	EHI_044810	C4LTA0	C4LTA0	28.201	27.1264	28.2762	26.0307	26.0927	25.5329	0.0328226	0.0985679	1.80612			6	5	4	5	3	3	4	6	19.5	19.5	19.5	23.784	0	17.175	968810000	10	39	5	4	5	3	3	4	210	210	19.5	18.1	19.5	14.3	14.3	19.5	308560000	146510000	325070016	68554000
t-SNARE coiled-coil homology domain-containing protein	EHI_021410	A0A8U0WPX7	A0A8U0WPX7	27.7729	26.3185	25.1585	22.5371	22.8891	21.8687	0.032907	0.0985679	3.70353			4	4	1	2	1	1	1	4	32.8	32.8	32.8	25.817	0	224.4	368150000	9	21	4	1	2	1	1	1	232	232	32.8	6.9	17.7	6.9	6.9	6.9	229340000	83686000	37450000	6086100
Pore-forming peptide amoebapore B	EHI_194540	Q24824	Q24824	26.796	24.6877	25.9193	19	22.0948	21.4036	0.032916	0.0985679	5.25358			4	4	3	3	1	1	1	4	51	51	51	10.437	0	32.064	214250000	7	17	4	3	3	1	1	1	96	96	51	36.5	41.7	15.6	15.6	15.6	116520000	27023000	63457000	0
Ethanolamine phosphotransferase, putative (Fragment); CDP-alcohol phosphatidyltransferase family protein	EHI_055140	B1N5L7;C4M2J1	B1N5L7;C4M2J1	26.095	25.1003	25.1985	22.2714	19	19	0.0329898	0.0986087	4.82894			2	2	2	2	1	0	0	2	13.2	13.2	13.2	15.374	0	3.0811	151220000	5	7	2	2	2	1	0	0	136	NaN	13.2	13.2	13.2	8.1	0	0	71678000	35971000	38504000	5062300
Uncharacterized protein	EHI_125690	C4LVV6	C4LVV6	26.0937	23.993	25.8915	21.704	19	19	0.0331716	0.098972	4.97402			4	4	2	3	1	0	0	4	14	14	14	41.654	0	60.229	153970000	21	12	4	2	3	1	0	0	363	363	14	6.1	9.6	3.3	0	0	71610000	16696000	62246000	3416400
Rab family GTPase	EHI_164900	C4M1Y3	C4M1Y3	28.8851	27.7217	28.3491	23.8334	19	23.2598	0.0336889	0.100197	6.90196			15	13	7	10	1	0	1	14	51.1	51.1	51.1	30.133	0	63.183	1084000000	15	39	12	6	9	0	0	0	264	264	44.7	25	41.7	2.7	0	2.7	495769984	221340000	341929984	14947000
Uncharacterized protein	EHI_130720	C4LXF0	C4LXF0	26.5172	24.1409	25.2644	21.6767	19	19	0.0337043	0.100197	4.96915			5	4	2	3	1	0	0	5	32.5	32.5	32.5	22.765	0	35.937	158200000	13	10	4	2	3	1	0	0	200	200	26	14	20.5	6.5	0	0	96042000	18499000	40304000	3352300
Phospholipase B-like	EHI_097630	C4M934	C4M934	30.0903	27.5627	27.7405	24.755	24.2198	23.733	0.033902	0.100603	3.97713			13	13	11	9	3	3	3	13	26.7	26.7	26.7	59.372	0	234.96	1627400000	24	67	13	11	9	3	3	3	509	509	26.7	25	21.8	6.7	6.7	7.9	1143100032	198240000	224250000	28313000
Rho guanine nucleotide exchange factor, putative	EHI_039480	C4M8C8	C4M8C8	26.7231	26.3513	27.5886	23.4901	24.9442	24.0889	0.0339935	0.100692	2.67056			8	5	6	6	2	3	2	8	12	12	12	95.96	0	64.516	460140000	41	40	5	6	6	2	3	2	835	835	7.5	9.1	9.6	3.6	5	4.3	110780000	85613000	201840000	11782000
Signal recognition particle receptor subunit beta	EHI_000670	B1N345;B1N2N5	B1N345;B1N2N5	27.2284	23.2578	23.9996	19	19	19	0.0341801	0.101062	5.82859			5	5	1	2	0	0	0	5	20.3	20.3	20.3	26.355	0	11.331	184050000	8	9	5	1	2	0	0	0	236	NaN	20.3	5.5	11	0	0	0	157240000	10030000	16772000	0
Phosphate transporter, putative	EHI_008030	C4LYD9	C4LYD9	25.918	23.2207	22.5408	19	19	19	0.0348711	0.10292	4.89316			4	3	3	1	0	0	0	4	13.2	13.2	13.2	47.564	0	128.98	79278000	8	8	3	3	1	0	0	0	432	432	11.6	10.4	4.9	0	0	0	63401000	9775300	6101700	0
Vacuolar sorting protein 26, putative	EHI_010730	C4LYW0	C4LYW0	24.2001	24.1223	24.9401	20.8952	22.6209	19	0.0350302	0.103204	2.66281			4	1	3	3	1	1	0	4	10.8	10.8	10.8	45.294	0	10.362	78125000	18	6	1	3	3	1	1	0	398	398	1.8	6.8	8.5	2.8	1.8	0	19273000	18262000	32190000	1950200
Transmembrane protein	EHI_142960	C4M6D2	C4M6D2	28.1824	26.9278	26.8808	25.0946	25.4299	24.4357	0.0351263	0.103302	2.06811			3	2	3	3	1	1	1	3	6	6	6	60.57	0	21.522	659590000	21	16	2	3	3	1	1	1	518	518	4.1	6	6	2.5	2.5	2.5	304620000	127670000	123570000	35828000
Tyrosine kinase, putative	EHI_186990	C4LVR6	C4LVR6	26.1096	23.1291	22.7641	19	19	19	0.0353469	0.103764	5.00095			4	4	2	2	0	1	0	4	6.3	6.3	6.3	101.2	0	14.546	88705000	48	9	4	2	2	0	1	0	892	892	6.3	3.1	3.5	0	1.7	0	72407000	9173800	7123400	0
RhoGAP domain containing protein	EHI_148840	C4LT51	C4LT51	25.049	21.7535	23.6562	19	19	19	0.0357825	0.104683	4.48624			3	2	1	2	0	0	0	3	9.1	9.1	9.1	50.637	0	7.5493	51469000	21	4	2	1	2	0	0	0	438	438	6.8	3.9	6.2	0	0	0	34713000	3535600	13220000	0
Protein tyrosine kinase domain-containing protein	EHI_064500	C4M0B9;C4M275;C4M3L3;C4LVZ5	C4M0B9	28.2902	26.8392	27.7594	25.781	25.1943	24.6314	0.0358708	0.104683	2.14194			14	11	8	9	6	5	3	13	14.8	14.8	14.2	133.17	0	88.934	797550000	59	62	10	7	8	6	5	3	1191	NaN	10.7	7.8	8.7	6.8	5.8	3.1	328249984	120060000	227200000	57656000
COP9 signalosome complex subunit 1, putative	EHI_182890	A0A8U0WPD1	A0A8U0WPD1	24.2673	24.3865	25.7336	21.8099	19	19	0.0360546	0.104683	4.39081			5	2	4	4	1	0	0	5	14.3	14.3	14.3	45.432	0	20.791	101590000	25	11	2	4	4	1	0	0	392	392	6.1	13.8	10.5	3.6	0	0	20192000	21931000	55793000	3676600
Ras family GTPase	EHI_091090	C4M7P6	C4M7P6	25.5372	24.2109	25.6075	22.0235	19	19	0.0360798	0.104683	4.60676			3	3	1	2	1	0	0	3	10.4	10.4	10.4	22.718	0	4.9505	123500000	11	10	3	1	2	1	0	0	201	201	10.4	6	6.5	6	0	0	48691000	19418000	51124000	4263200
Pyruvate, phosphate dikinase	PPDK	P37213;B1N2H6;B1N2H5	P37213	30.7267	28.8307	30.0603	27.3212	27.2207	26.6253	0.0361457	0.104683	2.60164			28	24	17	22	12	11	10	28	34.9	34.9	34.9	97.898	0	323.31	3801600000	51	185	24	17	22	12	11	10	885	NaN	30.1	21.4	28.1	16.9	15.5	15.4	1776899968	477430016	1119600000	167690000
Amino acid transporter, putative	EHI_162180	C4M8I5	C4M8I5	28.3022	26.1801	26.8596	22.9822	19	19	0.0361521	0.104683	6.12287			8	8	5	5	1	0	0	8	13.4	13.4	13.4	56.808	0	124.99	537070000	15	36	8	5	5	1	0	0	501	501	13.4	10.6	10.6	2	0	0	330990016	76034000	121770000	8285900
Tetratricopeptide repeat protein	EHI_151200	C4LSG4	C4LSG4	22.6614	20.874	21.1915	19	19	19	0.0361543	0.104683	2.57564			1	1	1	1	0	0	0	1	3	3	3	51.133	0	10.705	10951000	16	3	1	1	1	0	0	0	440	440	3	3	3	0	0	0	6633900	1921800	2394800	0
Protein kinase domain containing protein	EHI_121880	C4M5D4	C4M5D4	26.387	25.3588	25.0905	23.0156	23.8623	23.218	0.0361703	0.104683	2.17314			3	3	2	2	1	2	1	3	7.6	7.6	7.6	43.568	0	7.2561	200000000	21	13	3	2	2	1	2	1	382	382	7.6	5.5	5.5	2.9	5.5	2.9	87757000	43029000	35726000	8479800
PH domain containing protein	EHI_045310	C4LTE4	C4LTE4	25.7502	23.9596	24.9553	21.3339	22.5722	23.1023	0.0364333	0.105259	2.93529			7	5	2	4	1	1	3	7	32.1	32.1	32.1	35.681	0	44.414	123170000	17	20	5	2	4	1	1	3	308	308	23.4	6.5	16.2	3.6	2.9	10.4	56438000	16314000	32530000	2643300
Coatomer alpha subunit, putative	EHI_088090	A0A8U0WPY0	A0A8U0WPY0	26.4346	23.0324	23.0956	19	19	19	0.0373937	0.107674	5.18751			9	7	2	3	0	0	0	9	13.2	13.2	13.2	90.218	0	12.644	108240000	49	12	7	2	3	0	0	0	795	795	10.6	3.5	4.2	0	0	0	90699000	8579100	8963100	0
60S acidic riboomal protein P1, putative	EHI_042920	C4M660	C4M660	27.0073	25.436	26.2569	24.2495	23.9553	22.85	0.0374004	0.107674	2.131			4	3	3	3	3	2	2	4	51.9	51.9	51.9	11.191	0	34.287	304250000	5	27	3	3	3	3	2	2	106	106	51.9	51.9	51.9	37.7	37.7	34.9	134900000	45394000	80187000	19945000
Uncharacterized protein	EHI_141330	C4LW18;B1N4X5	C4LW18	29.7498	28.8358	29.401	28.1767	27.9539	27.0498	0.0374881	0.107737	1.26354			12	12	8	10	8	7	6	12	31.3	31.3	31.3	51.462	0	148.08	2793100000	23	110	12	8	10	8	7	6	463	NaN	31.3	23.1	28.7	23.1	20.5	15.3	902760000	479100000	708910016	303420000
PCTP-like protein, putative; START domain-containing protein	EHI_110720	C4LUB9;C4M0E1	C4LUB9;C4M0E1	27.6836	25.5186	26.7234	23.6251	23.8555	23.0534	0.0375899	0.1078	2.90157			4	3	3	4	1	2	2	4	20.1	20.1	20.1	30.795	0	78.106	411260000	13	31	3	3	4	1	2	2	259	NaN	15.8	16.6	20.1	7.7	7.7	7.7	215570000	48070000	110800000	12938000
LIM zinc finger domain containing protein	EHI_110280	C4LU80	C4LU80	23.0828	24.4513	24.8978	21.7734	21.377	19	0.0376412	0.1078	2.56875			2	1	2	2	1	1	0	2	8	8	8	32.824	0	8.2987	69390000	18	9	1	2	2	1	1	0	301	301	4	8	8	4	4	0	8884100	22939000	31259000	3584700
Rab family GTPase	EHI_042250	A0A8U0WPF2	A0A8U0WPF2	25.9585	24.2463	22.099	19	19	19	0.0383877	0.109746	5.10127			3	3	2	1	0	0	0	3	14.5	14.5	14.5	22.207	0	4.1421	89599000	9	6	3	2	1	0	0	0	200	200	14.5	10	5.5	0	0	0	65207000	19900000	4492300	0
ER-derived vesicles protein ERV14	EHI_049050	C4MAS2	C4MAS2	24.7549	21.9532	22.3229	19	19	19	0.0385053	0.109891	4.0103			1	1	1	1	0	0	0	1	9.5	9.5	9.5	17.364	0	19.229	37618000	3	5	1	1	1	0	0	0	148	148	9.5	9.5	9.5	0	0	0	28311000	4060300	5246400	0
Glucosidase, putative	EHI_023430	C4LUQ2	C4LUQ2	23.4536	23.7385	24.9778	19	21.4309	20.5738	0.0387011	0.110258	3.84116			7	3	2	4	0	1	1	7	10.2	10.2	10.2	100.11	0	7.2053	62912000	47	11	3	2	4	0	1	1	871	871	4.6	2.8	5.6	0	1.6	1.6	11488000	13996000	33041000	0
Phosphoglycerate mutase family protein	EHI_103650	C4LVK9	C4LVK9	23.4224	23.2985	24.309	22.3349	22.0263	21.6979	0.0392781	0.111708	1.49604			1	1	1	1	1	1	1	1	7.5	7.5	7.5	23.453	0	19.336	55305000	13	6	1	1	1	1	1	1	201	201	7.5	7.5	7.5	7.5	7.5	7.5	11242000	10317000	20784000	5290100
T-complex protein 1 subunit alpha	EHI_155220	C4LW75	C4LW75	26.1665	26.219	27.4908	24.3008	22.1777	21.6671	0.0396072	0.112449	3.38618			10	6	6	8	2	1	1	10	20.8	20.8	20.8	59.106	0	56.132	370770000	33	29	6	6	8	2	1	1	544	544	13.2	11.8	17.5	3.9	2.4	2.4	75318000	78111000	188600000	20666000
40S ribosomal protein S6	EHI_000590	C4LZB0;C4LXN2;B1N442;B1N350	C4LZB0;C4LXN2;B1N442;B1N350	26.2927	24.4138	26.8941	19	22.145	19	0.0398181	0.112852	5.29438			5	4	1	5	0	1	0	5	23.7	23.7	23.7	29.8	0	30.291	233910000	10	14	4	1	5	0	1	0	266	NaN	19.2	5.6	23.7	0	5.6	0	82201000	22351000	124720000	0
Myosin heavy chain	EHI_110180	C4LU72	C4LU72	30.7923	29.2346	30.0223	28.1289	27.7557	27.2698	0.0402182	0.113707	2.07412			42	33	21	27	14	12	12	42	20.9	20.9	20.9	246.57	0	310.76	4263700000	125	186	33	21	27	14	12	12	2151	2151	17.7	10.7	15.2	8.5	7.1	7.5	1859600000	631680000	1090499968	293529984
Ubiquitin carboxyl-terminal hydrolase domain containing protein	EHI_158580	C4M7G2	C4M7G2	24.5536	23.8731	24.0406	23.1249	22.229	19	0.0402581	0.113707	1.4788			5	4	2	3	2	1	0	5	4.4	4.4	4.4	153.91	0	6.6075	71307000	73	9	4	2	3	2	1	0	1298	1298	3.2	1.5	2.9	1.5	0.7	0	24624000	15364000	17256000	9146900
dolichyl-diphosphooligosaccharide--protein glycotransferase	EHI_118880	C4LYN6	C4LYN6	29.2116	27.4761	27.77	25.2899	25.9364	25.4035	0.0405199	0.114116	2.53939			9	8	6	4	1	2	2	9	13.2	13.2	13.2	81.296	0	67.02	1186900000	30	28	8	6	4	1	2	2	710	710	12	8.7	6.3	2.4	3.5	3.5	621670016	186690000	228870000	41021000
Heat shock protein 70, putative	EHI_148990	C4LT65;B1N3E4	C4LT65	24.9429	21.6767	23.0721	19	19	19	0.0405421	0.114116	4.23057			3	3	1	2	0	0	0	3	5.2	5.2	5.2	88.052	0	8.5027	44423000	40	6	3	1	2	0	0	0	769	NaN	5.2	1	3.8	0	0	0	32252000	3352200	8818700	0
Plasma membrane calcium ion-transporting ATPase, putative	EHI_136610	C4MAZ0;B1N3C3	C4MAZ0;B1N3C3	27.105	26.0045	24.9658	22.4539	23.4785	22.0527	0.0406405	0.114197	3.05888			6	4	5	4	1	1	1	5	10.8	10.8	9.4	69.255	0	21.171	266210000	25	20	4	5	3	1	1	1	627	NaN	7.2	9.4	7	1.6	1.6	1.6	144350000	67317000	32768000	5745000
EGF-like domain-containing protein	EHI_006980	A0A8U0WPN4	A0A8U0WPN4	35.6967	34.4275	34.4806	32.7036	33.1585	32.4277	0.040902	0.114722	1.93718			80	79	71	68	54	57	58	58	75.9	75.9	60	119.51	0	323.31	125130000000	60	1252	57	50	48	37	41	40	1101	1101	75.9	64.9	64.3	53.5	55.3	55	55688998912	23106000896	23971000320	6994800128
UDP-glucose:glycoprotein glucosyltransferase, putative	EHI_015280	C4M0W6	C4M0W6	28.3039	25.8161	26.7326	23.7758	23.6537	23.1517	0.0410306	0.114722	3.23614			15	10	6	10	1	1	1	15	9.9	9.9	9.9	150	0	49.812	538840000	74	44	10	6	10	1	1	1	1281	1281	5.6	5.1	7.5	0.9	0.9	0.9	331369984	59079000	111510000	14362000
Actophorin	ACTO	C4LVG4	C4LVG4	26.7261	25.6497	26.2447	24.7596	24.8714	24.1728	0.0411371	0.114722	1.39134			3	3	2	3	3	2	2	3	26.1	26.1	26.1	15.702	0	27.768	321180000	7	32	3	2	3	3	2	2	138	138	26.1	13.8	26.1	26.1	13.8	13.8	111010000	52640000	79516000	28404000
Uncharacterized protein	EHI_177500	C4LY53	C4LY53	25.1632	23.8541	24.4449	22.4909	22.9335	22.8327	0.0411637	0.114722	1.77522			2	2	1	1	1	1	1	2	10.7	10.7	10.7	24.516	0	8.6585	96949000	11	8	2	1	1	1	1	1	214	214	10.7	4.7	4.7	4.7	4.7	4.7	37572000	15164000	22838000	5894400
Chaperonin-containing TCP-1, zeta subunit, putative; T-complex protein 1 subunit zeta	EHI_125800	C4LVW6;C4LUW1	C4LVW6;C4LUW1	27.7688	26.8967	27.7389	26.1415	25.091	24.3433	0.0411767	0.114722	1.85188			10	9	8	6	6	5	6	10	20.9	20.9	20.9	59.913	0	41.382	708680000	32	51	9	8	6	6	5	6	540	NaN	18.9	16.3	12.8	11.9	9.8	11.9	228690000	124940000	224000000	74025000
Epsin-2, putative; ENTH domain-containing protein	EHI_104950	B1N3A5;C4LY23	B1N3A5;C4LY23	25.2464	21.6763	24.0317	19	19	19	0.0412943	0.114854	4.65148			3	3	1	2	0	0	0	3	13.1	13.1	13.1	27.346	0	16.059	60305000	11	6	3	1	2	0	0	0	274	NaN	13.1	4.7	9.5	0	0	0	39804000	3351400	17150000	0
Proteasome subunit alpha type	EHI_029210	C4MAW8;C4M4A2	C4MAW8;C4M4A2	23.3636	21.9764	23.0968	20.7581	19	19	0.0414644	0.11503	2.93322			1	1	1	1	1	0	0	1	4.9	4.9	4.9	27.603	0	4.0565	25663000	11	3	1	1	1	1	0	0	247	NaN	4.9	4.9	4.9	4.9	0	0	10793000	4126300	8970600	1773400
40S ribosomal protein S15a, putative	EHI_073600	C4LXM0	C4LXM0	25.0902	23.3141	25.1598	19	21.5708	19	0.0415645	0.11503	4.23597			2	1	1	2	0	1	0	2	14.6	14.6	14.6	14.67	0	6.9041	86750000	9	7	1	1	2	0	1	0	130	130	8.5	8.5	14.6	0	8.5	0	35720000	10429000	37486000	0
ATP-binding cassette protein, putative	EHI_178580	B1N2M5;B1N428;C4M9N1	B1N2M5	28.055	25.7152	26.062	23.5253	23.1822	19	0.0415677	0.11503	3.25699			17	15	6	7	2	3	0	14	14.1	13	10.6	154.19	0	115.29	425590000	66	39	13	3	5	2	2	0	1358	NaN	12.6	4.6	5.7	1.7	2.5	0	278860000	55085000	70056000	12073000
Uncharacterized protein	EHI_194240	C4LZT8	C4LZT8	30.9698	28.8917	28.1272	25.2742	25.7707	25.041	0.0417264	0.115275	3.80708			5	4	3	2	1	1	1	5	21.7	21.7	21.7	18.071	0	7.4822	3026600000	3	22	4	3	2	1	1	1	161	161	19.9	13	8.1	5	5	5	2102999936	498049984	293169984	40579000
Ran-binding protein, putative	EHI_009630	C4LZ37	C4LZ37	26.4772	25.8995	27.4378	21.6191	24.1081	23.113	0.0418062	0.115301	3.74127			15	8	5	15	1	3	2	15	17	17	17	120.11	0	71.249	368190000	51	41	8	5	15	1	3	2	1042	1042	9.3	5.4	17	1.3	3.3	2.1	93421000	62592000	181800000	3221000
Uncharacterized protein	EHI_024530	C4M0J5	C4M0J5	30.9512	29.2191	29.2363	26.973	27.4288	26.3301	0.0418829	0.115319	2.60132			9	9	5	6	5	5	3	9	37.3	37.3	37.3	36.638	0	177.12	3730200000	14	98	9	5	6	5	5	3	330	330	37.3	22.7	28.2	22.7	22.7	12.7	2076099968	624940032	632409984	131730000
V-type proton ATPase 16 kDa proteolipid subunit c	VMA3	Q24810	Q24810	31.9932	29.4046	29.222	25.6858	26.5484	25.9193	0.0421404	0.115833	4.08952			3	3	2	2	1	1	2	3	31.6	31.6	31.6	18.121	0	83.103	5827200000	5	39	3	2	2	1	1	2	177	177	31.6	14.1	14.1	4	4	14.1	4274799872	710670016	626160000	53975000
threonine ammonia-lyase	EHI_126080	C4LVZ3;B1N2N4;B1N610	C4LVZ3;B1N2N4;B1N610	26.6406	24.8847	25.6077	23.5206	22.0123	21.3661	0.0423635	0.116252	2.94453			3	2	3	2	2	1	1	3	11	11	11	45.23	0	24.249	205700000	21	19	2	3	2	2	1	1	426	NaN	7.3	11	7.3	7.3	4.2	4.2	104620000	30977000	51130000	12034000
Rab family GTPase	EHI_157890	C4M2C0;C4LXP5	C4M2C0;C4LXP5	26.5282	22.222	25.979	19	19	19	0.0429999	0.117801	5.90976			3	3	1	3	0	0	0	3	23.5	23.5	23.5	22.009	0	54.661	167820000	12	10	3	1	3	0	0	0	196	NaN	23.5	7.7	23.5	0	0	0	96783000	4892100	66140000	0
Uncharacterized protein	EHI_182570	C4LV38	C4LV38	23.0695	21.4372	24.6577	19	19	19	0.0431446	0.118	4.05481			4	1	1	4	0	0	0	4	8.8	8.8	8.8	70.259	0	6.251	38109000	38	6	1	1	4	0	0	0	600	600	2.3	2.3	8.8	0	0	0	8802800	2839500	26467000	0
Heat shock protein 70, putative	EHI_197860	C4M8K8	C4M8K8	26.7748	24.717	26.3912	23.0572	23.3302	23.2664	0.043514	0.118743	2.7673			9	6	4	5	1	1	1	9	14	14	14	86.354	0	18.041	259780000	43	19	6	4	5	1	1	1	757	757	10.2	7.7	6.6	0.9	0.9	0.9	114820000	27578000	88013000	8728000
60S ribosomal protein L37a, putative	EHI_148230	C4LSZ3;A0A175JXH6	C4LSZ3;A0A175JXH6	24.5195	21.3116	23.6041	19	19	19	0.0435606	0.118743	4.14505			2	2	1	1	0	0	0	2	28	28	28	10.241	0	10.626	39403000	4	5	2	1	1	0	0	0	93	NaN	28	19.4	19.4	0	0	0	24049000	2602700	12751000	0
Tyrosine kinase, putative	EHI_138750	C4M4I1	C4M4I1	27.6399	26.0131	26.1213	23.8919	24.5047	24.396	0.0442194	0.119992	2.39313			11	10	8	6	3	6	6	10	12.7	12.7	11.9	124.18	0	57.745	411300000	60	47	9	8	6	3	6	6	1088	1088	11.1	8.9	6.5	3.3	6.5	6.3	209140000	67721000	72995000	15566000
HEAT repeat domain containing protein	EHI_141090	C4M515	C4M515	25.0359	21.9974	22.3626	19	19	19	0.0443325	0.119992	4.13194			2	2	1	1	0	0	0	2	2	2	2	122.33	0	12.134	43978000	61	4	2	1	1	0	0	0	1071	1071	2	1.3	1.3	0	0	0	34399000	4186700	5392700	0
tyrosine--tRNA ligase	EHI_009240	C4LZ12	C4LZ12	27.2024	25.9844	27.8942	24.772	23.4555	22.5659	0.0443374	0.119992	2.91324			10	10	7	10	4	1	1	10	38.2	38.2	38.2	41.86	0	131.65	516630000	20	46	10	7	10	4	1	1	369	369	38.2	26.3	38.2	14.6	4.3	4.3	154430000	66387000	249450000	28649000
Serine/threonine-protein kinase TOR	EHI_169320	C4M249	C4M249	25.0998	21.6553	25.1027	19	19	19	0.0443922	0.119992	4.95262			7	3	1	5	0	0	0	7	3.2	3.2	3.2	269.49	0	9.9709	75291000	118	10	3	1	5	0	0	0	2342	2342	1.5	0.6	1.9	0	0	0	35958000	3303000	36030000	0
Large ribosomal subunit protein eL27	EHI_183480	C4M727;C4M9C4	C4M727;C4M9C4	24.4485	23.8844	21.2816	19	19	19	0.0444059	0.119992	4.20482			2	2	1	1	0	0	0	2	17.3	17.3	17.3	15.758	0	2.8515	40928000	9	5	2	1	1	0	0	0	139	NaN	17.3	8.6	8.6	0	0	0	22895000	15485000	2549100	0
Nucleoside transporter, putative	EHI_169580	C4M8V2	C4M8V2	30.9469	29.4387	29.2445	27.0227	27.7517	26.2752	0.0444577	0.119992	2.48949			5	5	5	5	5	4	3	5	10.3	10.3	10.3	42.764	0	218.86	3877100000	6	64	5	5	5	5	4	3	379	379	10.3	10.3	10.3	10.3	10.3	8.2	2069900032	727640000	636040000	136350000
Rhodanese domain-containing protein	EHI_181530	C4M8R5;A0A175JX40	C4M8R5	26.4729	25.2043	25.92	22.7388	24.1951	23.0178	0.0447655	0.120601	2.39874			5	5	3	3	1	2	1	5	6	6	6	94.263	0	5.1206	229980000	43	16	5	3	3	1	2	1	806	NaN	6	3.1	3.6	0.9	1.9	0.9	93141000	38658000	63487000	6999500
Leucine-rich repeat containing protein	EHI_140310	C4M479	C4M479	24.66	21.9704	21.9546	19	19	19	0.0448305	0.120601	3.8617			2	2	2	1	0	0	0	2	3.9	3.9	3.9	75.93	0	3.6655	34683000	36	6	2	2	1	0	0	0	663	663	3.9	3.9	2.1	0	0	0	26510000	4109200	4064500	0
Peptidase S74 domain-containing protein	EHI_105190	C4M124	C4M124	24.7505	22.0144	21.9983	19	19	19	0.0450378	0.120961	3.92109			2	2	1	1	0	0	0	2	3.9	3.9	3.9	55.869	0.00075131	2.1958	36651000	17	4	2	1	1	0	0	0	487	487	3.9	1.6	1.6	0	0	0	28225000	4236500	4189500	0
Peroxiredoxin, putative	EHI_114010	C4M8W7	C4M8W7	28.6256	27.4782	28.7242	26.3288	26.6858	25.9142	0.0451375	0.121031	1.76873			3	2	2	3	2	2	2	0	51.9	9	0	26.225	0	21.321	1300100000	13	24	0	0	0	0	0	0	233	233	48.9	48.9	50.6	42.1	39.1	43.3	414169984	186970000	443449984	84287000
Sulfotransferase	EHI_092490	C4LV11	C4LV11	26.0872	24.7574	25.984	23.7238	22.1316	22.3328	0.0453641	0.121393	2.68184			3	3	2	2	2	1	1	3	7.1	7.1	7.1	53.603	0	6.7707	189750000	26	19	3	2	2	2	1	1	449	449	7.1	3.8	3.8	3.8	2.2	2.2	71290000	28361000	66367000	13854000
Transmembrane protein	EHI_057700	C4M705	C4M705	30.5136	28.9913	28.3807	26.1569	26.7932	26.3957	0.0454399	0.121393	2.82018			5	5	4	4	3	4	2	5	13	13	13	43.924	0	106.25	2695500000	11	63	5	4	4	3	4	2	399	399	13	11.3	11.3	6.8	11.3	6	1532899968	533640000	349500000	74819000
Protein YIPF	EHI_092140	C4LUX9	C4LUX9	29.0025	27.3067	26.5383	23.999	24.7484	23.9824	0.0454946	0.121393	3.24213			3	3	2	2	2	2	1	3	17.3	17.3	17.3	25.796	0	146.16	862790000	6	36	3	2	2	2	2	1	231	231	17.3	17.3	17.3	17.3	17.3	9.1	537800000	166010000	97461000	16766000
Small ribosomal subunit protein eS1	EHI_065270	C4M609;C4LTQ5	C4M609;C4LTQ5	28.7913	27.1376	28.6621	24.816	26.0827	26.4792	0.0456943	0.121728	2.74767			11	9	6	10	2	3	3	11	37.1	37.1	37.1	29.037	0	79.697	1231100000	14	66	9	6	10	2	3	3	256	NaN	25.8	21.9	33.6	8.2	11.7	11.7	464569984	147650000	424769984	29537000
Small ribosomal subunit protein uS2	EHI_081410	C4M5A0	C4M5A0	26.9029	25.2874	25.8543	24.17	23.2992	22.3239	0.04586	0.121971	2.28024			3	3	2	2	2	1	1	3	17.7	17.7	17.7	28.595	0	54.462	261550000	14	20	3	2	2	2	1	1	254	254	17.7	11.8	11.8	11.8	4.3	4.3	125480000	40952000	60663000	18876000
GPI transamidase component PIG-T	EHI_001830	C4M5J7	C4M5J7	28.3934	23.0192	25.3905	19	19	19	0.0461387	0.122514	6.60104			6	6	1	3	0	0	0	6	13.1	13.1	13.1	47.296	0	7.2471	405070000	19	10	6	1	3	0	0	0	420	420	13.1	3.8	6	0	0	0	352590016	8500900	43985000	0
Calcium-transporting ATPase	EHI_054830	C4M2K1	C4M2K1	31.2729	29.5402	29.1113	26.5352	27.413	26.0103	0.0462698	0.122664	3.00067			29	28	24	20	5	7	8	14	33.3	32.6	15.6	120.63	0	323.31	4298800000	52	207	14	13	10	4	5	7	1087	1087	32.4	27.1	24	5.6	7.5	8.6	2594599936	780700032	579939968	97251000
Rap-GAP domain-containing protein	EHI_138990	B1N3Q0	B1N3Q0	26.6955	25.0675	26.8112	24.0161	23.1517	19	0.0464227	0.12287	2.60749			11	9	6	6	2	1	0	11	10.5	10.5	10.5	159.86	0	54.224	287880000	76	31	9	6	6	2	1	0	1386	1386	9.3	4.8	5.8	2.1	0.6	0	108680000	35161000	117750000	16965000
HEAT repeat domain containing protein	EHI_146520	C4MA08	C4MA08	23.2059	21.8772	25.5582	19	19	19	0.0466812	0.123356	4.54707			3	1	1	3	0	0	0	3	6.3	6.3	6.3	81.403	0	45.203	62932000	42	9	1	1	3	0	0	0	715	715	2.8	2.1	6.3	0	0	0	9675300	3852000	49405000	0
3-dehydrosphinganine reductase	EHI_200770	C4M3Y2	C4M3Y2	26.5797	24.7639	22.1053	19	19	19	0.0468188	0.123509	5.48297			2	2	2	2	0	0	0	2	7.1	7.1	7.1	37.923	0	7.8135	133300000	15	7	2	2	2	0	0	0	337	337	7.1	7.1	7.1	0	0	0	100300000	28488000	4511900	0
F-box domain containing protein, putative; Right handed beta helix domain-containing protein	EHI_103710	B1N2Q6;C4LVI6	B1N2Q6;C4LVI6	25.1961	23.7035	23.5788	22.0016	21.9332	20.7303	0.0469377	0.123509	2.19202			3	3	3	1	1	1	1	3	13.4	13.4	13.4	29.003	0	12.51	74573000	13	12	3	3	1	1	1	1	307	NaN	13.4	13.4	5.2	5.2	5.2	5.2	38441000	13660000	12529000	4199100
Midasin	EHI_153780	C4LSF8;B1N2F1	C4LSF8	24.097	21.0677	23.3117	19	19	19	0.0469652	0.123509	3.82548			4	3	1	2	0	0	0	4	0.9	0.9	0.9	520.24	0	4.0522	30553000	258	7	3	1	2	0	0	0	4492	NaN	0.7	0.2	0.4	0	0	0	17944000	2197900	10412000	0
Mitochondrial carrier protein, putative	EHI_095150	C4M4S8	C4M4S8	26.1749	25.5671	26.1142	23.0283	19	19	0.0476806	0.124798	4.93795			6	4	4	4	2	0	0	6	19.9	19.9	19.9	30.442	0	25.502	206670000	16	25	4	4	4	2	0	0	276	276	12.7	10.9	12.3	7.6	0	0	75760000	49713000	72638000	8554700
Uncharacterized protein	EHI_035980	C4M7F7	C4M7F7	25.8183	25.9375	24.6297	22.5819	19	22.3057	0.0476832	0.124798	4.67092			8	5	4	6	1	0	2	8	11.3	11.3	11.3	102.7	0	70.272	160850000	38	20	5	4	6	1	0	2	875	875	7	4.9	8.2	1	0	2.1	59169000	64263000	25959000	6278000
Exportin 1 family protein	EHI_107080	C4M149	C4M149	24.438	23.696	24.618	23.0991	23.034	22.1153	0.0477162	0.124798	1.18416			2	1	1	2	1	1	1	2	2.9	2.9	2.9	101.03	0	7.1521	84185000	42	6	1	1	2	1	1	1	884	884	1.1	1.1	2.9	1.1	1.1	1.1	22729000	13590000	25749000	8985100
T-complex protein 1 subunit delta; T-complex protein 1 subunit delta, putative	EHI_114120	C4M419;B1N453	C4M419;B1N453	24.6952	25.2303	25.5757	22.5324	19	19	0.0477678	0.124798	4.4009			5	3	2	3	1	1	0	5	12.8	12.8	12.8	58.188	0	23.781	122600000	33	13	3	2	3	1	1	0	538	NaN	7.1	3.2	9.1	3.2	3.2	0	27164000	39363000	50011000	6066300
Protein phosphatase, putative	EHI_086040	C4M359	C4M359	26.8358	24.5017	26.6799	22.4887	19	19	0.0478355	0.124798	5.26147			10	7	3	6	2	0	0	2	37.6	37.6	4.6	31.667	0	26.205	256940000	18	30	2	1	1	1	0	0	282	282	27.7	13.5	22.3	9.9	0	0	119780000	23755000	107510000	5885300
Adenosylhomocysteinase	EHI_068250	C4LU18	C4LU18	29.7827	27.9252	27.7362	25.9209	25.5347	24.8833	0.0485899	0.126565	2.7535			17	17	10	11	7	8	6	17	42.3	42.3	42.3	51.505	0	323.31	1545100000	25	89	17	10	11	7	8	6	466	466	42.3	27.3	27.7	19.7	22.5	17.2	923600000	254870000	223570000	63530000
Putative transcription enhancer protein	EHI_140650	C4M3N7	C4M3N7	26.9047	26.6151	27.6633	25.8119	25.7095	24.658	0.049003	0.127439	1.30036			18	6	10	12	6	4	4	18	16.3	16.3	16.3	132.2	0	90.148	581240000	63	58	6	10	12	6	4	4	1175	1175	7.2	9.6	9.5	6	3.6	4.1	125640000	102790000	212560000	58905000
Protein disulfide isomerase, putative	EHI_071590	C4MB38	C4MB38	30.3697	27.773	30.1667	26.2898	25.4174	25.255	0.049855	0.129449	3.58287			12	12	8	11	5	5	4	12	29.3	29.3	29.3	41.725	0	160.14	2989000000	18	85	12	8	11	5	5	4	368	368	29.3	25.3	29.1	14.1	14.1	9.2	1387399936	229350000	1205299968	82041000
AIG1 family protein; AIG1 family protein, putative	EHI_022500	C4MBK3;C4M5W9;C4MB96	C4MBK3;C4M5W9;C4MB96	26.64	24.2422	24.8531	19	22.0885	21.4928	0.0501555	0.129496	4.70085			4	4	1	2	0	1	1	3	12.7	12.7	10.1	35.221	0	20.782	162140000	21	11	3	1	2	0	1	1	306	NaN	12.7	4.6	6.2	0	4.6	4.6	104580000	19844000	30306000	0
Dolichyl-diphosphooligosaccharide--protein glycosyltransferase 48 kDa subunit	EHI_028900	C4M4V6;C4LWN1	C4M4V6;C4LWN1	26.4165	25.0934	25.4912	22.794	19	19	0.0502368	0.129496	4.77001			1	1	1	1	1	0	0	1	1.9	1.9	1.9	48.126	0.0013432	1.4344	179800000	19	7	1	1	1	1	0	0	416	NaN	1.9	1.9	1.9	1.9	0	0	89569000	35798000	47163000	7272400
VWFA domain-containing protein	EHI_096810	C4LWJ1	C4LWJ1	26.827	25.3452	25.8751	24.3327	24.1035	19	0.0502732	0.129496	1.79768			4	3	3	4	1	1	0	4	11.2	11.2	11.2	54.2	0	20.113	262370000	20	14	3	3	4	1	1	0	473	473	8.5	8.5	11.2	1.9	1.9	0	119050000	42624000	61544000	21128000
Lipid phosphate phosphatase, putative	EHI_056630	C4M9S8;C4M3P1	C4M9S8	26.1083	23.2747	22.1366	19	19	19	0.0502946	0.129496	4.83988			3	3	2	1	0	0	0	3	6.7	6.7	6.7	46.551	0	3.9902	87101000	16	6	3	2	1	0	0	0	402	NaN	6.7	4	1.7	0	0	0	72342000	10148000	4610900	0
Rab family GTPase	EHI_026420	A0A8U0WPF5	A0A8U0WPF5	26.5052	25.4437	26.9231	24.6524	24.0473	23.1647	0.0503453	0.129496	1.94081			5	2	3	5	2	2	1	5	30.8	30.8	30.8	21.868	0	9.5654	321240000	13	15	2	3	5	2	2	1	195	195	10.3	17.4	30.8	10.3	10.3	5.6	95247000	45636000	127250000	26370000
Uncharacterized protein	EHI_096410	C4LWF4	C4LWF4	30.1952	28.5984	28.0876	26.4647	26.2256	24.555	0.0503764	0.129496	2.61526			4	4	2	3	3	2	1	4	32.4	32.4	32.4	15.664	0	118.33	2116700000	5	48	4	2	3	3	2	1	136	136	32.4	25.7	32.4	32.4	25.7	15.4	1229299968	406420000	285240000	92611000
GTP-binding nuclear protein	EHI_148190	C4LSY9	C4LSY9	26.9931	26.06	27.0301	25.0645	25.5154	24.3728	0.0504252	0.129496	1.40448			4	2	2	4	1	2	2	4	19.2	19.2	19.2	24.994	0	12.032	445360000	14	19	2	2	4	1	2	2	219	219	9.1	9.1	19.2	5.9	9.1	9.1	133580000	69959000	137050000	35089000
UDP-N-acetylglucosamine pyrophosphorylase, putative	EHI_039830	C4MA87;C4M036	C4MA87;C4M036	24.0585	22.2842	24.0892	21.1617	20.8601	19	0.0505337	0.129572	2.46635			3	2	1	2	1	1	0	3	7.7	7.7	7.7	46.257	0	8.8324	44676000	26	7	2	1	2	1	1	0	401	NaN	5.7	3.5	5.5	3.5	3.5	0	17471000	5107600	17847000	2345900
60S acidic ribosomal protein P2, putative; 60S acidic ribosomal protein P2	EHI_138770	C4M4I3;B1N3L3	C4M4I3;B1N3L3	24.6336	23.5634	23.3896	22.327	22.212	19	0.0508632	0.130213	1.59268			2	2	1	1	1	1	0	1	22.9	22.9	13.3	11.426	0	4.3966	59534000	6	7	1	1	1	1	1	0	105	NaN	22.9	13.3	13.3	13.3	13.3	0	26029000	12396000	10989000	5261300
Aminoacyl-histidine dipeptidase, putative	EHI_042170	C4M4H1	C4M4H1	28.6977	27.6002	29.3367	26.5539	24.9694	24.7146	0.0509918	0.130339	2.78318			12	8	5	10	4	2	2	12	26.2	26.2	26.2	56.919	0	73.349	1475700000	21	44	8	5	10	4	2	2	516	516	22.1	10.9	23.3	8.3	4.3	4.1	435390016	203460000	677980032	98520000
Molybdenum cofactor sulfurase putative	EHI_194600	C4LZX1	C4LZX1	28.4326	27.0514	28.4523	26.2379	25.1157	24.83	0.0511777	0.130611	2.30197			7	7	4	6	3	3	3	7	18.4	18.4	18.4	60.486	0	45.468	1014000000	28	57	7	4	6	3	3	3	532	532	18.4	9.4	16	7.1	7.1	7.1	362289984	139090000	367289984	79142000
Transmembrane protein	EHI_049350	C4LUD7	C4LUD7	27.2048	26.0878	25.3808	23.1678	24.2654	22.8516	0.0515957	0.131473	2.50783			5	4	4	3	1	2	2	5	12.1	12.1	12.1	61.948	0	22.313	306860000	19	21	4	4	3	1	2	2	538	538	10.8	9.7	6.7	2.2	4.3	4.3	154690000	71318000	43690000	9423500
Signal recognition particle receptor alpha subunit, putative	EHI_200840	C4M3Y9	C4M3Y9	27.4891	26.6562	27.8171	25.9206	25.9263	25.7879	0.0519597	0.132195	1.39737			8	5	4	7	5	4	5	8	15.6	15.6	15.6	54.149	0	35.521	715830000	29	51	5	4	7	5	4	5	488	488	11.1	9.8	13.7	9.8	9.2	11.3	188390000	105760000	236470000	63514000
CCT-theta; T-complex protein 1 subunitTheta, putative	EHI_140600	C4M3N2;B1N510	C4M3N2;B1N510	25.9118	23.5303	24.6205	21.8016	19	19	0.0522014	0.132605	4.28672			7	5	1	4	1	0	0	7	18.2	18.2	18.2	58.949	0	15.568	104690000	26	7	5	1	4	1	0	0	538	NaN	13.9	1.9	8.4	2	0	0	63129000	12115000	25793000	3655400
Rab GDP dissociation inhibitor	EHI_164890	C4M1Y2;B1N309	C4M1Y2;B1N309	26.9639	22.3083	24.1057	19	19	19	0.0524863	0.132892	5.45931			8	8	2	3	0	0	0	8	23.5	23.5	23.5	49.305	0	78.154	154150000	28	16	8	2	3	0	0	0	439	NaN	23.5	7.1	11.4	0	0	0	130900000	5193600	18053000	0
Aminoacyl-histidine dipeptidase, putative	EHI_127280	C4LX00	C4LX00	22.4672	21.7395	25.0924	19	19	19	0.0525237	0.132892	4.0997			3	2	1	2	0	0	0	3	6.9	6.9	6.9	56.307	0	4.0059	45072000	26	4	2	1	2	0	0	0	505	505	3.8	1.6	5.3	0	0	0	5798400	3501400	35773000	0
signal peptidase I	EHI_197020	C4LVB9	C4LVB9	29.227	26.7124	27.8305	25.1937	24.6801	24.3795	0.0526288	0.132892	2.98639			5	5	4	4	2	2	3	5	23.8	23.8	23.8	21.049	0	116.23	1064100000	11	46	5	4	4	2	2	3	189	189	23.8	19	20.1	14.8	14.8	15.3	628350016	109960000	238680000	38377000
Variant sh3 domain containing protein	EHI_148050	C4LSX5	C4LSX5	23.1711	22.8261	24.033	21.4041	19	19	0.0527045	0.132892	3.14131			1	1	1	1	1	0	0	1	3.3	3.3	3.3	43.937	0.0013822	1.6152	36820000	17	4	1	1	1	1	0	0	393	393	3.3	3.3	3.3	3.3	0	0	9444700	7435800	17165000	2775100
ADP-ribosylation factor, putative	EHI_053050	A0A8U0WPY9	A0A8U0WPY9	26.7313	22.4563	23.4227	19	19	19	0.0527197	0.132892	5.20342			2	2	1	1	0	0	0	2	12.4	12.4	12.4	19.993	0	4.5447	128410000	10	4	2	1	1	0	0	0	177	177	12.4	7.3	7.3	0	0	0	111410000	5754700	11244000	0
Transmembrane protein	EHI_110000	C4M3L8	C4M3L8	23.3746	23.7378	22.9495	24.5071	25.8888	23.2544	0.0528998	0.132934	-1.84394			4	1	2	1	3	4	2	4	27.3	27.3	27.3	23.829	0	83.568	128940000	16	18	1	2	1	3	4	2	209	209	9.1	15.8	9.1	21.5	27.3	15.8	10876000	13989000	8100000	23843000
Thioredoxin	EHI_017000	C4MAK2	C4MAK2	26.163	25.8331	26.467	23.2807	19	21.0085	0.0529195	0.132934	5.01405			5	5	3	5	2	0	1	5	9.6	9.6	9.6	65.392	0	8.0502	239980000	25	25	5	3	5	2	0	1	563	563	9.6	5.9	9.6	3.4	0	1.8	75137000	59777000	92762000	10190000
DEAD/DEAH box helicase, putative	EHI_093900	C4LYI1	C4LYI1	28.0285	27.1277	28.1124	26.3015	24.6761	22.8206	0.052999	0.132934	2.26739			13	10	8	12	7	4	2	13	33	33	33	44.04	0	44.332	827550000	26	59	10	8	12	7	4	2	391	391	28.4	18.9	31.2	18.2	10.5	5.4	273790016	146640000	290190016	82708000
Histone H2B	EHI_182990	C4LV75	C4LV75	24.4022	23.7762	24.8683	23.176	22.3635	19	0.0530602	0.132934	1.57908			1	1	1	1	1	1	0	1	7.5	7.5	7.5	14.519	0.00070771	1.8114	82036000	6	5	1	1	1	1	1	0	133	133	7.5	7.5	7.5	7.5	7.5	0	22171000	14366000	30626000	9477200
Uncharacterized protein	EHI_010710	C4LYV8	C4LYV8	30.0937	28.0546	27.8437	25.8422	25.7812	24.658	0.0541968	0.135575	2.8523			14	13	8	6	3	2	1	14	35	35	35	46.332	0	175.84	1809800000	18	51	13	8	6	3	2	1	423	423	33.3	20.8	14.7	8.5	5.2	2.8	1145799936	278780000	240870000	60154000
Radical SAM domain protein	EHI_068170	C4LU10	C4LU10	25.7033	25.4385	26.0132	25.0547	24.4162	23.9306	0.0546038	0.136385	0.982951			2	1	2	1	1	1	1	2	7.4	7.4	7.4	43.186	0	6.164	241060000	18	10	1	2	1	1	1	1	376	376	2.4	7.4	2.4	2.4	2.4	2.4	54636000	45474000	67725000	34850000
Peptidyl-prolyl cis-trans isomerase	EHI_125840	A0A8U0WPD6	A0A8U0WPD6	27.3233	25.2686	25.4185	22.8244	19	21.0498	0.0548057	0.136494	5.09122			2	2	2	2	1	1	1	2	12.6	12.6	12.6	18.139	0	17.08	262800000	10	20	2	2	2	1	1	1	167	167	12.6	12.6	12.6	5.4	7.2	7.2	167930000	40420000	44846000	7427500
Phosphoglucomutase/phosphomannomutase family protein	EHI_185280	C4M3Z6	C4M3Z6	28.6478	24.8033	25.9046	21.8866	21.9749	20.7393	0.0548621	0.136494	4.52115			8	7	6	4	2	1	1	8	16.8	16.8	16.8	66.65	0	54.363	522420000	34	29	7	6	4	2	1	1	594	594	15.3	11.8	7.6	5.2	2.9	2.9	420580000	29278000	62814000	3877200
Centromere/microtubule binding protein cbf5, putative	EHI_115300	C4M8E1	C4M8E1	27.4782	23.3585	23.0633	19	19	19	0.054897	0.136494	5.63333			6	6	1	2	0	0	0	6	13.8	13.8	13.8	54.117	0	27.328	206480000	26	10	6	1	2	0	0	0	484	484	13.8	2.1	4.5	0	0	0	186960000	10755000	8765000	0
V-type proton ATPase subunit H	EHI_068750	C4LU65	C4LU65	25.1651	23.2538	24.2474	20.841	22.2282	19	0.0552971	0.137013	2.68749			3	3	1	3	1	1	0	3	9.7	9.7	9.7	51.97	0	62.05	74330000	23	9	3	1	3	1	1	0	444	444	9.7	1.8	9.7	1.8	1.8	0	37622000	10002000	19915000	1878300
AP-2 complex subunit alpha	EHI_011780	A0A8U0WP09	A0A8U0WP09	21.6531	25.6302	25.8614	19	19	19	0.0553421	0.137013	5.38156			1	1	1	1	0	0	0	1	0.8	0.8	0.8	99.086	0.0099648	0.79727	116190000	34	2	1	1	1	0	0	0	862	862	0.8	0.8	0.8	0	0	0	3297900	51934000	60961000	0
Hemolysin-3, putative	EHI_080730	C4M9P1	C4M9P1	28.2667	25.403	24.765	21.5911	22.1272	20.5331	0.0553563	0.137013	4.28574			4	4	2	3	1	1	1	4	11.2	11.2	11.2	32.14	0	21.117	405080000	8	18	4	2	3	1	1	1	277	277	11.2	7.9	8.7	4.3	4.3	4.3	322950016	44368000	28510000	3159200
Lipid phosphate phosphatase, putative	EHI_169660	C4M8U7	C4M8U7	26.5216	23.3329	22.2579	19	19	19	0.0555212	0.137214	5.03745			4	4	1	1	0	0	0	4	11.9	11.9	11.9	42.393	0	22.747	111920000	14	10	4	1	1	0	0	0	371	371	11.9	3.5	3.5	0	0	0	96335000	10566000	5015200	0
Rab family GTPase	EHI_127380	A0A8U0WQ04	A0A8U0WQ04	26.3307	25.3136	26.5565	23.1814	19	19	0.0556782	0.137395	4.9762			5	5	5	4	2	1	0	5	28.5	28.5	28.5	23.044	0	48.981	234310000	15	22	5	5	4	2	1	0	207	207	28.5	28.5	23.2	15	8.7	0	84397000	41701000	98695000	9512700
Galactose/N-acetyl-D-galactosamine lectin light subunit 1	lgl1	Q03077	Q03077	25.0411	23.7848	24.4615	22.8213	23.1173	19	0.0562271	0.138541	1.45984			2	2	1	2	1	1	0	2	13.9	10.4	10.4	33.594	0	3.924	88589000	19	7	2	1	2	1	1	0	288	288	13.9	9	13.9	9	9	3.5	34525000	14452000	23101000	7411100
SPRY domain protein	EHI_161890	C4M6N2	C4M6N2	24.285	23.1498	24.496	22.4948	22.0233	21.1569	0.0564483	0.138878	1.71794			3	3	1	2	1	1	1	3	2.9	2.9	2.9	119.96	0	12.915	65921000	59	10	3	1	2	1	1	1	1034	1034	2.9	1	2	1	1	1	20442000	9306600	23661000	5910100
phosphatidylinositol N-acetylglucosaminyltransferase	EHI_105870	C4M9H3	C4M9H3	25.1519	23.0948	24.3072	22.0587	21.4719	20.7159	0.0567686	0.139457	2.41934			4	4	1	2	1	1	1	4	10.7	10.7	10.7	51.526	0.00073368	2.0331	75997000	22	13	4	1	2	1	1	1	449	449	10.7	2.7	5.3	2.7	2.7	2.7	37281000	8958100	20759000	4368500
PRA1 family protein	EHI_011900	C4LTI4	C4LTI4	30.084	27.6685	27.8271	24.5792	25.804	23.9826	0.0569334	0.139653	3.33493			4	4	2	3	1	2	1	4	16	16	16	17.085	0	18.471	1689800000	5	33	4	2	3	1	2	1	150	150	16	8.7	14.7	8.7	8.7	8.7	1138099968	213330000	238110000	25065000
Isopentenyl phosphate kinase	EHI_178490	C4LUR5	C4LUR5	23.8495	24.4433	24.3165	22.1644	19	21.4531	0.0571155	0.13989	3.6209			3	1	3	1	1	0	1	3	13.5	13.5	13.5	28.49	0	3.3963	66391000	14	9	1	3	1	1	0	1	259	259	4.2	13.5	3.5	3.5	0	3.5	15115000	22812000	20893000	4700500
Serine-threonine-isoleucine rich protein, putative	EHI_073630	C4LXM3	C4LXM3	27.9836	26.2456	27.0365	21.4482	24.6305	23.7359	0.0578735	0.14135	4.04922			24	20	12	16	2	6	4	24	6.4	6.4	6.4	558.66	0	106.43	525430000	223	65	20	12	16	2	6	4	5069	5069	5.3	2.9	4.2	0.4	1.4	0.9	265400000	79563000	137660000	2861200
t-SNARE coiled-coil homology domain-containing protein	EHI_068480	A0A8U0WPA2	A0A8U0WPA2	26.722	22.3219	23.3605	19	19	19	0.0578837	0.14135	5.1348			4	4	2	1	0	0	0	4	62.9	62.9	62.9	12.017	0	71.28	126710000	4	9	4	2	1	0	0	0	105	105	62.9	18.1	18.1	0	0	0	110690000	5242900	10770000	0
Arp2/3 complex 34 kDa subunit	EHI_091250	C4M782	C4M782	29.0044	27.1295	28.2215	25.8224	26.1579	25.8606	0.0583535	0.142285	2.12829			7	6	6	5	2	3	3	7	25.6	25.6	25.6	33.577	0	57.501	1193400000	20	41	6	6	5	2	3	3	293	293	22.5	22.5	19.5	8.9	12.6	12.6	538499968	146820000	312990016	59337000
Actin-like protein, putative	EHI_111050	C4M5I6	C4M5I6	27.8503	27.0219	28.3236	26.4075	25.9749	25.199	0.0585637	0.142586	1.54071			8	4	4	7	3	2	3	8	16	16	16	44.649	0	57.428	907670000	24	62	4	4	7	3	2	3	401	401	11	11	14	9	5.7	8.2	241970000	136270000	335940000	89014000
Uncharacterized protein	EHI_105170	C4M122	C4M122	24.6979	25.03	25.7969	22.7253	19	19	0.0589272	0.143258	4.31229			5	3	3	4	1	0	0	5	10.1	10.1	10.1	67.783	0	29.598	126700000	35	19	3	3	4	1	0	0	586	586	7	6.1	7.8	2.6	0	0	27215000	34259000	58295000	6934000
Diaphanous protein, homolog 1, putative	EHI_192460	C4M1G6	C4M1G6	22.7771	21.3043	24.8943	19	19	19	0.0591725	0.143559	3.99188			6	2	2	3	0	0	0	6	5.3	5.3	5.3	135.16	0	6.4108	40960000	64	7	2	2	3	0	0	0	1212	1212	1.6	1.5	3	0	0	0	7187600	2589600	31183000	0
Ubiquitin carboxyl-terminal hydrolase domain containing protein	EHI_059810	B1N3J1	B1N3J1	26.8582	26.3643	28.025	23.8335	19	23.0744	0.0592568	0.143559	5.66572			1	1	1	1	1	0	1	1	0.8	0.8	0.8	139.24	0.00070423	1.7749	504950000	58	9	1	1	1	1	0	1	1172	1172	0.8	0.8	0.8	0.8	0	0.8	121650000	86387000	273129984	14949000
Uncharacterized protein	EHI_155510	C4LWA2	C4LWA2	24.3186	21.6522	21.5126	19	19	19	0.0593133	0.143559	3.49444			2	2	1	1	0	0	0	2	4.1	4.1	4.1	68.413	0.00072833	1.9824	27211000	14	4	2	1	1	0	0	0	592	592	4.1	1.5	1.5	0	0	0	20923000	3295700	2991800	0
CBM20 domain-containing protein	EHI_107050	C4M146	C4M146	26.7028	21.812	24.8178	19	19	19	0.059491	0.143758	5.4442			3	3	1	3	0	0	0	3	37.6	37.6	37.6	14.358	0	114.32	142480000	7	13	3	1	3	0	0	0	125	125	37.6	12	37.6	0	0	0	109230000	3681900	29573000	0
Fructose-1,6-bisphosphate aldolase, putative	EHI_098570	C4LXD7	C4LXD7	27.116	26.0999	25.7554	24.5523	24.8891	23.8268	0.0596562	0.143758	1.60307			5	5	4	3	1	2	1	5	13.6	13.6	13.6	36.216	0	26.407	344580000	21	26	5	4	3	1	2	1	330	330	13.6	11.5	8.8	3.9	6.4	3.9	145460000	71919000	56643000	24603000
3(2),5-bisphosphate nucleotidase	EHI_193350	C4M4T9	C4M4T9	25.1732	22.3483	21.6963	19	19	19	0.0597173	0.143758	4.07258			3	3	1	1	0	0	0	3	14.5	14.5	14.5	35.038	0	31.04	46573000	19	6	3	1	1	0	0	0	317	317	14.5	3.5	6	0	0	0	37835000	5339500	3398000	0
Pyruvate:ferredoxin oxidoreductase	EHI_051060	C4LTX6	C4LTX6	32.0849	31.56	32.6206	31.0337	30.6824	30.2515	0.059779	0.143758	1.23048			40	31	23	33	25	18	22	40	36.1	36.1	36.1	127.63	0	323.31	19524000000	55	388	31	23	33	25	18	22	1162	1162	26.8	22.3	30	22.2	18.3	19.3	4555200000	3165999872	6603700224	2198200064
Serine carboxypeptidase (S28) family protein	EHI_068090	C4LU03;C4M7N4	C4LU03;C4M7N4	30.2685	27.5818	27.6393	25.4077	24.5927	23.062	0.0598334	0.143758	3.49639			10	10	8	7	5	4	2	10	29	29	29	54.072	0	323.31	1781900000	20	59	10	8	7	5	4	2	480	NaN	29	25.6	22.9	13.8	10	5.2	1293400064	200890000	209060000	44511000
Elongation factor 1-alpha	EHI_052400	C4MAC9	C4MAC9	33.2108	32.8246	34.2214	31.8724	31.7962	31.1968	0.0603448	0.144591	1.58461			28	23	19	25	18	14	16	2	49.5	49.5	7.9	48.421	0	178.4	47699000000	29	504	2	1	2	1	1	0	442	442	41.4	36.2	42.3	29.9	28.5	29	9941499904	7606400000	20028999680	3931500032
Large ribosomal subunit protein uL15C	rpl27a-3	Q9BI14	Q9BI14	24.4289	24.0959	25.4218	19	22.35	21.84	0.0603565	0.144591	3.97386			1	1	1	1	0	1	1	1	8.1	8.1	8.1	17.065	0	7.0877	94566000	7	7	1	1	1	0	1	1	149	149	8.1	8.1	8.1	0	8.1	8.1	22586000	17930000	44950000	0
3-ketoacyl-CoA synthase	EHI_158240	C4M2E3;B1N502;C4LZ15	C4M2E3	31.4683	29.561	29.2881	19	25.689	19	0.0608095	0.145464	7.76127			20	19	14	14	0	2	0	19	45.5	45.5	43.4	56.511	0	323.31	4472500000	29	134	18	13	13	0	2	0	495	NaN	43.8	30.1	31.7	0	4.8	0	2970899968	792030016	655520000	0
Uncharacterized protein	EHI_130880	C4LXF6	C4LXF6	24.0209	22.5481	23.4571	21.0139	21.8995	19	0.0612939	0.146409	1.88536			2	1	1	2	1	1	0	2	4.4	4.4	4.4	58.355	0	4.7944	40700000	19	7	1	1	2	1	1	0	503	503	2	2	4.4	2	2	0	17022000	6132600	11516000	2117400
Palmitoyltransferase	EHI_004980	C4M092;C4LW58	C4M092	28.3689	25.9029	24.2722	22.1162	19	19	0.0615643	0.146842	5.62321			7	7	4	2	1	0	0	7	24	24	24	32.897	0	50.43	434200000	9	22	7	4	2	1	0	0	275	NaN	24	13.5	7.3	3.3	0	0	346649984	62739000	20261000	4546200
Small GTPase Rab7A	EHI_192810	A0A8U0WPK6	A0A8U0WPK6	28.7416	26.9875	28.8588	24.5342	19	24.0677	0.0617478	0.147066	6.42886			10	9	8	6	1	0	1	10	60.7	55.8	55.8	22.937	0	303.11	1110600000	13	48	9	8	6	1	0	1	206	206	60.7	55.8	48.1	5.3	4.9	10.2	448820000	133060000	486800000	24295000
Arrestin C-terminal-like domain-containing protein	EHI_167660	C4M7Z8	C4M7Z8	26.1515	24.5863	25.7969	23.7008	23.7628	19	0.0621277	0.147756	1.77973			5	5	3	4	1	1	0	5	11.7	11.7	11.7	74.219	0	32.347	185890000	30	16	5	3	4	1	1	0	649	649	11.7	6.8	9.6	1.7	1.7	0	74539000	25189000	58295000	13635000
Sulfite exporter TauE/SafE family protein	EHI_078310	C4M550	C4M550	28.0217	26.8489	26.4115	23.5841	25.3502	24.3992	0.0623078	0.14797	2.62693			4	4	3	3	1	3	2	4	8.5	8.5	8.5	50.416	0	24.944	560120000	12	28	4	3	3	1	3	2	460	460	8.5	6.3	6.3	2.6	6.3	3.3	272510016	120870000	89262000	12575000
H(+)-transporting two-sector ATPase	EHI_043010	A0A8U0WNY3	A0A8U0WNY3	28.2595	26.2898	27.4952	25.4411	24.6441	24.1577	0.0629751	0.149232	2.30554			5	5	4	4	2	2	1	5	10.4	10.4	10.4	67.068	0	24.701	683040000	36	36	5	4	4	2	2	1	607	607	10.4	8.9	8.9	4.8	3.5	2	321340000	82038000	189180000	45556000
Gelsolin repeat protein, putative	EHI_009570	C4LZ32	C4LZ32	23.0307	23.4095	23.7011	24.0829	24.1296	22.7767	0.063021	0.149232	-0.725766			3	1	3	2	1	1	1	3	2.5	2	2	169.15	0.00070922	1.8214	76658000	78	9	1	3	2	1	1	1	1416	1416	1.1	2	1.1	0.6	1.1	0.6	8569300	11142000	13638000	17769000
Protein kinase domain-containing protein	EHI_061870	C4MA57	C4MA57	24.9183	22.2653	22.3885	19	20.3421	19.8493	0.0636489	0.150501	3.51965			6	5	2	2	0	1	1	6	3.5	3.5	3.5	231.45	0	9.1828	44513000	114	8	5	2	2	0	1	1	2089	2089	3	1.2	1.2	0	0.5	0.5	31708000	5041000	5490500	0
WD repeat protein; WD repeat protein 2, putative	EHI_118160	C4LZ00;B1N2S4;B1N501	C4LZ00;B1N2S4	28.4226	24.9974	23.7094	19	21.1187	20.5417	0.0649068	0.153255	5.65044			14	14	4	2	0	1	1	14	28.1	28.1	28.1	65.331	0	46.137	410810000	36	22	14	4	2	0	1	1	595	NaN	28.1	7.2	4	0	1.8	1.8	359800000	33494000	13716000	0
Uncharacterized protein	EHI_127120	C4LWY5	C4LWY5	24.001	23.9796	22.2959	21.3506	19	19	0.0650242	0.153311	3.25023			1	1	1	1	1	0	0	1	4.6	4.6	4.6	27.185	0	5.4422	41154000	8	5	1	1	1	1	0	0	239	239	4.6	4.6	4.6	4.6	0	0	16789000	16542000	5149100	2674000
Long-chain-fatty-acid--CoA ligase, putative	EHI_153720	C4LSF2	C4LSF2	25.7453	21.3125	24.4864	19	19	19	0.0652485	0.153619	4.84805			4	4	1	2	0	0	0	4	7.9	7.9	7.9	74.945	0	72.581	82355000	25	8	4	1	2	0	0	0	658	658	7.9	2.4	5	0	0	0	56247000	2604300	23504000	0
Ras family GTPase	EHI_058090	C4M8B0	C4M8B0	32.8272	31.4804	32.4192	30.6598	30.8649	29.9111	0.0654339	0.153835	1.47992			15	14	14	13	10	8	9	8	67.4	67.4	30.4	20.536	0	290.25	21021000000	12	185	7	8	8	4	3	3	184	184	63	66.8	52.7	54.3	45.1	53.3	7620199936	2996100096	5743200256	1696400000
Nucleoporin	EHI_098830	C4M876	C4M876	26.2114	24.2274	24.672	19	22.4832	19	0.0656418	0.154103	4.29534			7	6	2	2	0	1	0	7	5.1	5.1	5.1	161.28	0	22.864	129940000	68	14	6	2	2	0	1	0	1416	1416	4.2	1.5	1.7	0	0.8	0	77702000	19641000	26731000	0
Uncharacterized protein	EHI_059830	C4M342	C4M342	32.7792	31.5934	32.504	31.0134	30.9489	30.0994	0.0661668	0.154816	1.31107			34	29	32	29	25	23	23	34	43.6	43.6	43.6	99.295	0	323.31	22093000000	44	450	29	32	29	25	23	23	904	904	41.4	42.7	37.8	33.7	30.6	32	7371100160	3240199936	6090999808	2167500032
Uncharacterized protein	EHI_047800	C4M7X1	C4M7X1	28.416	26.3242	26.7148	24.5898	24.9574	23.801	0.0661816	0.154816	2.37804			11	11	6	7	3	5	3	11	37.8	37.8	37.8	34.017	0	53.772	624750000	15	48	11	6	7	3	5	3	304	304	37.8	19.7	24	8.2	16.1	8.2	358150016	84018000	110140000	25250000
Flavodoxin-like domain-containing protein	EHI_198580	C4LWQ4	C4LWQ4	29.4409	28.9129	29.7085	27.8677	28.5746	28.1552	0.0662908	0.154816	1.1329			14	12	11	13	6	8	9	14	60.4	60.4	60.4	22.589	0	101.35	3055100000	14	96	12	11	13	6	8	9	202	202	58.9	57.9	60.4	29.7	34.7	45.5	728790016	505400000	877289984	244920000
Uncharacterized protein	EHI_083110	C4M755	C4M755	25.8736	23.541	25.1191	22.2325	19	19	0.0664011	0.154816	4.2283			2	2	2	2	1	1	0	2	4.9	4.9	4.9	60.553	0	18.061	115060000	25	13	2	2	2	1	1	0	526	526	4.9	4.9	4.9	2.1	2.1	0	61481000	12205000	36442000	4927900
Phosphoglycerate kinase	EHI_188180	C4M192	C4M192	29.7196	27.4897	28.1137	25.7682	26.1877	25.5325	0.066417	0.154816	2.46305			16	16	6	8	3	4	3	16	39.8	39.8	39.8	44.866	0	88.653	1545100000	21	69	16	6	8	3	4	3	415	415	39.8	14.2	19.5	5.8	7.5	5.8	884089984	188460000	290449984	57149000
EF-hand domain-containing protein	EHI_178830	C4LUU7	C4LUU7	23.5527	22.3048	23.9591	21.3767	19	19	0.0668369	0.155574	3.08387			2	1	2	1	1	0	0	2	4.3	4.3	4.3	67.166	0	9.2439	36516000	33	6	1	2	1	1	0	0	579	579	2.8	4.3	2.8	2.8	0	0	12305000	5180900	16308000	2722800
Dephospho-CoA kinase, putative	EHI_155780	C4LWC7	C4LWC7	25.3678	24.8328	26.5955	23.8333	23.5167	22.8929	0.067123	0.156018	1.92374			4	3	2	3	1	2	1	4	20.6	20.6	20.6	23.134	0	57.651	209310000	13	19	3	2	3	1	2	1	204	204	15.7	10.3	15.2	6.4	11.8	6.4	43297000	29883000	101400000	14946000
Cell cycle-associated GTPase, putative	EHI_027640	C4M1V0	C4M1V0	24.0253	24.0234	25.4691	19	22.289	21.3827	0.0673202	0.156255	3.86143			5	3	3	5	0	1	1	5	40.7	40.7	40.7	20.865	0	17.965	88434000	11	21	3	3	5	0	1	1	189	189	19.6	19.6	40.7	0	5.8	5.8	17074000	17051000	46449000	0
Ras family GTPase	EHI_004860	C4M081	C4M081	28.7972	27.6249	28.341	26.9495	27.0728	26.5473	0.0674361	0.156303	1.24324			4	3	3	4	3	3	3	4	22.4	22.4	22.4	20.697	0	18.293	1382300000	9	31	3	3	4	3	3	3	183	183	16.4	16.4	22.4	16.4	16.4	16.4	466470016	206980000	340000000	129600000
Reticulon-like protein	EHI_159310	C4LX24	C4LX24	26.2968	21.9262	23.003	19	19	19	0.0681957	0.157841	4.74197			3	3	1	2	0	0	0	3	7.5	7.5	7.5	34.007	0	19.495	94826000	10	8	3	1	2	0	0	0	294	294	7.5	4.8	5.1	0	0	0	82436000	3985100	8405800	0
Transmembrane protein	EHI_103670	C4LVL1	C4LVL1	27.1824	25.8512	25.1656	23.2744	19	19	0.0684296	0.158159	4.92921			5	5	4	2	2	0	0	5	14.2	14.2	14.2	37.495	0	8.7354	260620000	16	21	5	4	2	2	0	0	323	323	14.2	11.8	6.5	6.5	0	0	152310000	60531000	37637000	10146000
threonine--tRNA ligase	EHI_103730	C4LVL5	C4LVL5	27.0447	25.7561	27.6187	25.0515	23.6841	21.7505	0.0685396	0.158191	2.4387			10	5	4	8	3	3	1	10	13.9	13.9	13.9	77.863	0	21.359	452980000	36	30	5	4	8	3	3	1	676	676	7.7	5.5	12.7	4.4	4.3	1.2	138440000	56669000	206090000	34773000
Ribosome assembly factor mrt4	EHI_102940	C4MAY8;C4LX57	C4MAY8;C4LX57	23.4769	22.6981	23.3793	21.6315	19	21.0708	0.0687462	0.158444	2.86901			1	1	1	1	1	0	1	1	4.9	4.9	4.9	26.044	0.0097146	0.96445	34842000	18	5	1	1	1	1	0	1	225	NaN	4.9	4.9	4.9	4.9	0	4.9	11675000	6804700	10911000	3248900
Sphingomyelin synthase-like domain-containing protein	EHI_129780	C4M5Q9	C4M5Q9	25.0547	22.7012	23.1768	19	21.2927	19	0.0693542	0.159622	3.49791			1	1	1	1	0	1	0	1	4.2	4.2	4.2	38.314	0	8.04	53722000	16	4	1	1	1	0	1	0	333	333	4.2	4.2	4.2	0	4.2	0	34851000	6819300	9482500	0
Uncharacterized protein	EHI_120590	C4M8X0	C4M8X0	32.3558	30.3437	30.0092	28.2237	28.3618	27.664	0.0704581	0.161935	2.61017			29	26	22	17	12	11	9	29	44.3	44.3	44.3	86.873	0	323.31	8810600000	33	183	26	22	17	12	11	9	765	765	40.9	32.5	25.2	17.6	17.6	12.9	5496300032	1362599936	1080600064	313460000
Papain family cysteine protease domain containing protein; Uncharacterized protein	EHI_010340	C4LYT1;B1N312	C4LYT1;B1N312	28.1078	27.6587	28.6853	27.2176	26.8186	26.3584	0.0705805	0.16199	1.13246			5	3	4	4	3	3	2	5	7.9	7.9	7.9	64.06	0	7.7563	1293200000	18	22	3	4	4	3	3	2	554	NaN	4.3	5.8	6.5	4.3	4.3	2.9	289260000	211880000	431640000	156070000
H/ACA ribonucleoprotein complex subunit 2-like protein, putative	EHI_001850	C4M5J9	C4M5J9	26.4858	24.3929	25.2261	22.8101	19	22.997	0.070708	0.162056	4.46321			2	2	2	2	1	0	1	2	25.2	25.2	25.2	15.512	0	37.621	170980000	4	8	2	2	2	1	0	1	139	139	25.2	25.2	25.2	5.8	0	5.8	93975000	22029000	39247000	7353900
Nucleolar GTP-binding protein 1	EHI_174940	C4LZL9	C4LZL9	23.9699	20.8031	24.4945	19	19	19	0.070916	0.162306	4.08919			4	2	1	4	0	0	0	4	6.4	6.4	6.4	75.869	0	3.8106	41897000	33	8	2	1	4	0	0	0	656	656	3.7	1.5	6.4	0	0	0	16431000	1829600	23637000	0
Phosphoglucomutase	PGM	O15820	O15820	27.792	26.9076	28.2602	26.3118	26.1689	25.4141	0.0710498	0.162385	1.41288			12	9	7	11	4	4	4	12	23	23	23	60.788	0	59.597	883230000	29	58	9	7	11	4	4	4	553	553	18.3	15.6	21.3	8.3	9.4	8.3	232390000	125890000	321489984	83301000
HEAT repeat domain containing protein	EHI_064450	C4M0B4	C4M0B4	24.795	21.9541	25.2359	20.8155	19	19	0.071161	0.162413	4.08724			7	4	2	6	1	0	0	7	8.7	8.7	8.7	119.95	0	30.939	74533000	48	13	4	2	6	1	0	0	1062	1062	5	2.5	7.7	1.4	0	0	29109000	4062900	39516000	1845400
Serine/threonine-protein phosphatase 4 regulatory subunit 3-like central domain-containing protein	EHI_199640	C4M775	C4M775	24.5108	23.021	25.0775	21.9849	22.0827	19	0.0715146	0.162994	2.16933			3	3	1	3	1	1	0	3	8.1	8.1	8.1	56.948	0	18.307	76414000	23	10	3	1	3	1	1	0	494	494	8.1	3.4	8.1	3.4	3.4	0	23905000	8511500	35406000	4150500
WD domain containing protein	EHI_069460	C4LWN4;B1N5X0	C4LWN4	25.7706	25.139	25.7088	26.1768	26.3794	25.2811	0.0717801	0.163237	-0.738662			5	2	2	2	4	4	4	5	7.5	7.5	7.5	80.027	0	14.101	352960000	39	30	2	2	2	4	4	4	710	NaN	2.5	2.8	2.5	6.5	6.5	6.5	57245000	36947000	54841000	75858000
60S ribosomal protein L7, putative	EHI_025830	C4M938;C4M751;C4MA09	C4M938;C4M751;C4MA09	28.0401	27.4766	29.1577	26.5081	26.4551	25.0333	0.0718204	0.163237	1.7432			8	6	4	6	3	3	3	2	32.6	32.6	7	25.715	0	92.007	1283400000	9	58	1	1	2	1	1	1	230	NaN	32.2	21.7	28.3	18.3	18.3	18.3	276000000	186760000	598899968	95441000
EGF-like domain-containing protein	EHI_185450	B1N494	B1N494	25.7016	24.0799	23.2061	21.6922	21.8201	20.5532	0.0723862	0.164296	2.57307			3	3	2	1	1	1	2	3	9.6	5	5	93.838	0	69.468	90610000	41	12	3	2	1	1	1	2	861	861	8.6	3	5.6	1.9	1.9	3	54571000	17733000	9676700	3388500
pyridoxal kinase	EHI_126090	C4LVZ4	C4LVZ4	24.831	21.5956	21.7158	19	19	19	0.0727522	0.164898	3.71414			1	1	1	1	0	0	0	1	3.6	3.6	3.6	30.996	0	2.9459	36458000	12	3	1	1	1	0	0	0	279	279	3.6	3.6	3.6	0	0	0	29845000	3169100	3444300	0
Fe-hydrogenase, putative	EHI_073390	C4LXK4	C4LXK4	27.8042	26.5084	28.3336	25.7197	23.5039	24.7621	0.0729721	0.165169	2.93695			9	8	4	7	3	1	3	8	18.4	18.4	15.8	51.167	0	28.306	763690000	24	36	8	4	6	3	1	3	468	468	15.8	9.4	16.7	6.6	2.1	6.6	234360000	95458000	338270016	55257000
Protein phosphatase family protein	EHI_179330	C4M9X3	C4M9X3	25.2019	25.027	25.8481	23.177	19	19	0.0746476	0.168579	4.27048			1	1	1	1	1	1	1	1	37.2	4.3	4.3	31.581	0	6.4959	142670000	18	9	1	1	1	1	1	1	282	282	27.3	13.5	22.3	9.9	4.3	4.3	38595000	34189000	60401000	9483900
40S ribosomal protein S5, putative; Small ribosomal subunit protein uS7	EHI_126110	C4LVZ6;O15587	C4LVZ6;O15587	28.334	27.365	28.8937	24.9971	19	23.8746	0.0746844	0.168579	6.19902			4	4	4	4	1	0	1	4	16.6	16.6	16.6	22.922	0	20.113	1058800000	13	29	4	4	4	1	0	1	205	NaN	16.6	16.6	16.6	3.9	0	3.9	338360000	172860000	498729984	33487000
EamA domain-containing protein	EHI_131130	C4LXI1	C4LXI1	28.382	26.0511	25.8214	23.6356	24.1325	22.3993	0.075385	0.169927	2.86747			5	4	2	3	1	1	1	5	12.8	12.8	12.8	45.982	0	62.678	515580000	10	18	4	2	3	1	1	1	406	406	10.3	5.9	8.4	2.7	2.7	2.7	349800000	69528000	59296000	13032000
Autophagy-related protein 27	EHI_096530	C4LWG5	C4LWG5	26.6442	24.4676	23.3526	19	21.8727	19	0.0758778	0.170798	4.38506			4	4	2	2	0	1	0	4	21	21	21	30.644	0	20.443	142630000	9	14	4	2	2	0	1	0	267	267	21	10.1	12	0	4.1	0	104880000	23199000	10711000	0
Helicase C-terminal domain-containing protein	EHI_031370	C4M4L4	C4M4L4	25.8914	23.8193	24.8237	19	22.5424	19	0.076119	0.170798	4.07363			4	4	1	2	0	1	0	4	5.2	5.2	5.2	117.93	0	9.5188	112850000	52	12	4	1	2	0	1	0	1005	1005	5.2	1.1	3	0	1.1	0	62244000	14802000	29695000	0
Uncharacterized protein	EHI_050590	C4LTT1;C4M063	C4LTT1;C4M063	26.4433	24.0209	23.9188	19	22.1493	23.0011	0.0761799	0.170798	4.21971			4	4	3	1	0	1	2	4	8.6	8.6	8.6	56.831	0	60.324	137180000	23	18	4	3	1	0	1	2	500	NaN	8.6	6.2	2.8	0	2.8	4.6	91251000	17022000	15859000	0
60S ribosomal protein L7a	EHI_103310	C4LVH6;B1N3R9	C4LVH6;B1N3R9	26.1637	23.8805	25.7431	22.7444	22.9421	19	0.0761876	0.170798	2.41918			2	2	1	2	1	1	0	2	3.5	3.5	3.5	32.247	0	5.58	161860000	13	8	2	1	2	1	1	0	286	NaN	3.5	3.1	3.5	3.1	3.1	0	75172000	15444000	56163000	7026800
Uncharacterized protein	EHI_104450	C4LZ56;B1N421	C4LZ56	25.1909	24.1557	25.6743	23.6641	22.4017	20.6104	0.0771198	0.172651	1.97408			7	5	3	6	3	3	1	7	19	19	19	61.932	0	32.752	130970000	25	26	5	3	6	3	3	1	538	NaN	14.1	7.8	17.7	9.1	9.1	3.7	38301000	18689000	53548000	13292000
Bacterial transferase hexapeptide family protein	EHI_004840	C4M079	C4M079	25.9733	25.3638	26.5955	24.9223	24.3788	23.2807	0.0773334	0.172865	1.32699			3	3	3	3	3	3	2	3	23.7	23.7	23.7	19.233	0	35.287	274250000	7	26	3	3	3	3	3	2	177	177	23.7	23.7	23.7	23.7	23.7	16.4	65878000	43178000	101400000	31794000
Sec7 domain protein	EHI_103820	C4LVM4	C4LVM4	26.4744	23.9326	25.607	22.7325	19	19	0.0774472	0.172865	4.47177			7	5	4	7	3	1	0	7	6.9	6.9	6.9	135.06	0	37.225	167320000	56	23	5	4	7	3	1	0	1163	1163	5.2	4.2	6.9	3.1	0.9	0	93237000	16012000	51105000	6968700
Ubiquitin-conjugating enzyme family protein	EHI_025230	C4M310	C4M310	25.9398	25.3147	27.2529	24.4656	23.6828	24.1341	0.0775312	0.172865	2.09489			3	2	2	3	2	1	3	3	17.1	17.1	17.1	17.361	0	27.461	321070000	7	22	2	2	3	2	1	3	152	152	12.5	14.5	17.1	14.5	9.9	17.1	64367000	41732000	159930000	23168000
Uncharacterized protein	EHI_167700	C4M7Z1	C4M7Z1	27.045	23.5274	21.9053	19	19	19	0.0780296	0.17374	5.15923			8	8	2	1	0	1	0	8	10.4	10.4	10.4	116.13	0	28.426	154490000	61	15	8	2	1	0	1	0	1022	1022	10.4	2.3	1.3	0	1.4	0	138470000	12091000	3927700	0
TLDc domain-containing protein	EHI_125330	B1N3X0	B1N3X0	24.097	23.9305	25.1366	23.2246	21.8674	21.6086	0.0788001	0.175218	1.84202			2	1	2	2	2	1	1	2	15.2	15.2	15.2	18.352	0	13.894	87643000	11	9	1	2	2	2	1	1	158	158	7.6	15.2	15.2	15.2	7.6	7.6	17944000	15988000	36886000	9801900
Exocyst complex component 2	EHI_048540	C4M2W7	C4M2W7	23.9767	22.79	22.7955	21.6135	19	19	0.0789582	0.175332	2.88062			2	2	1	1	1	0	0	2	3.2	3.2	3.2	111.94	0	18.914	34248000	57	5	2	1	1	1	0	0	973	973	3.2	1.5	1.5	1.5	0	0	16508000	7252200	7279800	3208600
TolA protein, putative	EHI_159620	C4LX42	C4LX42	23.8862	24.5757	24.3809	19	22.5339	19	0.0792914	0.175834	3.51399			3	2	3	2	0	1	0	3	19.6	10.9	10.9	35.366	0	3.8012	68431000	17	8	2	3	2	0	1	0	312	312	8	16.7	16.7	6.1	6.1	0	15505000	25005000	21847000	0
Vacuolar ATP synthase proteolipid subunit, putative	EHI_029370	C4MAX4	C4MAX4	25.8378	22.6584	23.4234	19	21.2093	19	0.080129	0.177452	3.86855			1	1	1	1	1	1	0	1	6.9	6.9	6.9	18.373	0	7.5099	80266000	4	5	1	1	1	1	1	0	173	173	6.9	6.9	6.9	6.9	6.9	0	59972000	6620100	11250000	0
T-complex protein 1 subunit eta	EHI_044940	B1N2H1;C4M759	B1N2H1;C4M759	25.4297	24.4643	25.4027	23.0647	19	22.0356	0.0809771	0.179088	4.06657			5	3	1	3	2	0	1	5	12.4	12.4	12.4	55.31	0	15.672	125780000	31	12	3	1	3	2	0	1	500	NaN	6.4	1.8	7.8	4.2	0	1.8	45197000	23147000	44359000	8773400
Nucleoplasmin-like domain-containing protein	EHI_099720	C4M6H5	C4M6H5	26.0531	24.6235	25.5175	22.1305	24.0433	22.8933	0.0812676	0.179489	2.31117			2	2	2	2	1	2	1	2	14.3	14.3	14.3	13.926	0	3.6179	173170000	6	11	2	2	2	1	2	1	126	126	14.3	14.3	14.3	7.9	14.3	7.9	69625000	25847000	48033000	4591300
AP complex subunit sigma	EHI_178740	A0A8U0WPL9	A0A8U0WPL9	24.1874	23.9589	24.5917	23.5388	23.6905	22.8534	0.0823333	0.181598	0.631347			1	1	1	1	1	1	1	1	5.4	5.4	5.4	17.605	0.010012	0.82442	93998000	9	6	1	1	1	1	1	1	149	149	5.4	5.4	5.4	5.4	5.4	5.4	19105000	16306000	25284000	12187000
Mob1/phocein family protein	EHI_083630	C4M947	C4M947	24.0854	23.34	23.1178	21.1356	22.5547	21.9338	0.0826073	0.181958	1.66922			1	1	1	1	1	1	1	1	4.2	4.2	4.2	24.853	0.010291	0.95107	49991000	10	7	1	1	1	1	1	1	214	214	4.2	4.2	4.2	4.2	4.2	4.2	17800000	10618000	9102000	2303900
Malate dehydrogenase, putative	EHI_092450	C4LV07	C4LV07	24.1257	22.0595	23.7174	21.3976	19	19	0.0829189	0.182399	3.10205			1	1	1	1	1	0	0	1	3.8	3.8	3.8	40.564	0.00072569	1.948	39230000	21	7	1	1	1	1	0	0	370	370	3.8	3.8	3.8	3.8	0	0	18304000	4370800	13793000	2762600
Uncharacterized protein	EHI_179830	C4M634	C4M634	27.4166	25.645	26.2304	24.7764	24.6317	23.941	0.0833493	0.183101	1.72659			5	5	2	2	1	1	1	5	10.3	10.3	10.3	69.031	0	67.06	381180000	18	21	5	2	2	1	1	1	630	630	10.3	4.1	3.7	2.2	2.2	2.2	179150000	52469000	78727000	28736000
Uncharacterized protein	EHI_161640	C4MBF5	C4MBF5	28.9534	26.9776	26.6048	23.9232	25.4763	24.4089	0.0842373	0.184526	2.81225			5	5	2	3	1	1	2	5	15.8	15.8	15.8	38.804	0	96.372	838880000	10	29	5	2	3	1	1	2	342	342	15.8	8.2	11.4	3.2	3.2	8.2	519820000	132150000	102060000	15907000
60S ribosomal protein L7, putative	EHI_141990	C4LW44	C4LW44	25.0659	23.8962	25.457	23.1496	23.3565	23.0257	0.0842795	0.184526	1.55329			2	2	2	2	1	1	1	2	11.6	11.6	11.6	28.608	0	7.8205	125380000	13	16	2	2	2	1	1	1	249	249	11.6	11.6	11.6	4.4	4.4	4.4	35122000	15612000	46060000	9305300
serine--tRNA ligase	EHI_092640	C4LV24;B1N346	C4LV24;B1N346	27.3384	25.5745	26.9992	24.5439	25.052	24.6574	0.0843354	0.184526	1.83945			4	3	2	2	1	1	1	4	11.7	11.7	11.7	52.037	0	16.637	439500000	27	25	3	2	2	1	1	1	453	NaN	8.6	6.4	4.9	3.3	3.3	3.3	169700000	49968000	134140000	24459000
C_GCAxxG_C_C family protein	EHI_005970	C4M2N2	C4M2N2	26.024	24.9859	26.5286	23.5666	19	23.2591	0.0850619	0.185868	4.56284			1	1	1	1	1	0	1	1	11.6	11.6	11.6	11.928	0	8.0724	220730000	6	4	1	1	1	1	0	1	112	112	11.6	11.6	11.6	11.6	0	11.6	68233000	33227000	96809000	12424000
PPi-type phosphoenolpyruvate carboxykinase 1	PEPCK1	C4LY96	C4LY96	26.9751	25.0001	24.9668	22.0161	23.7967	24.307	0.0855342	0.186651	2.74095			8	4	3	3	1	3	2	1	7.6	7.6	0.8	130.91	0	7.3489	237840000	54	19	1	0	0	0	0	0	1151	1151	4.2	2.3	3	1	2.5	1.8	131920000	33556000	32792000	4241300
Acid phosphatase, putative	EHI_146950	C4M8S6	C4M8S6	22.7827	20.9991	22.4631	23.6839	24.1825	22.8222	0.0856679	0.186695	-1.85161			3	2	1	2	3	3	2	3	6.5	6.5	6.5	49.338	0	13.504	55025000	24	13	2	1	2	3	3	2	418	418	4.8	2.6	4.8	6.5	6.5	4.3	7215500	2095800	5781700	13476000
WW domain-containing protein	EHI_068340	C4LU27	C4LU27	24.1473	22.399	23.4814	19	21.6704	21.7006	0.0860971	0.187381	3.00735			3	2	1	2	0	1	1	3	6.8	6.8	6.8	90.707	0	4.9238	42569000	36	9	2	1	2	0	1	1	800	800	3.9	1.9	4.8	0	1.9	1.9	18581000	5530600	11711000	0
CXXC-rich protein	EHI_050970	C4LTW7	C4LTW7	27.1482	25.034	23.4923	19	22.2655	19	0.0870928	0.188968	4.5921			8	8	2	2	0	1	0	8	14.2	14.2	14.2	67.478	0	26.262	199930000	21	16	8	2	2	0	1	0	614	614	14.2	3.4	3.6	0	1.6	0	148740000	34355000	11800000	0
Galactose/N-acetyl-D-galactosamine lectin heavy subunit 2	hgl2	P23502	P23502	30.0366	29.1428	29.682	28.5071	28.8997	28.3834	0.0872517	0.188968	0.917062			21	15	14	18	10	11	9	21	41.3	21.2	21.2	144.33	0	323.31	3787800000	71	139	15	14	18	10	11	9	1286	1286	31.7	30.6	35.5	27.8	27.9	27.1	1101299968	592739968	861360000	381500000
Uncharacterized protein	EHI_096670	C4LWH9	C4LWH9	25.3131	23.3794	24.5624	22.4444	19	21.4235	0.0872589	0.188968	3.69611			8	7	6	4	2	2	1	8	3.4	3.4	3.4	331.84	0	53.663	85894000	153	19	7	6	4	2	2	1	2870	2870	3.2	2.5	1.8	0.9	0.9	0.4	41686000	10912000	24775000	5707200
Short chain dehydrogenase family protein	EHI_165070	C4M1Y9	C4M1Y9	29.8139	27.3331	28.0252	25.2223	19	19	0.0873765	0.188968	6.27958			9	9	7	6	2	1	0	9	27.2	27.2	27.2	36.669	0	59.191	1425200000	15	42	9	7	6	2	1	0	323	323	27.2	21.1	17.6	7.1	4.3	0	943779968	169080000	273160000	39144000
26S protease regulatory subunit, putative	EHI_180350	C4M285	C4M285	21.873	21.3018	22.567	20.7681	19	20.6817	0.0874021	0.188968	2.02989			1	1	1	1	1	0	1	1	2.9	2.9	2.9	46.304	0.00071073	1.8274	16107000	28	3	1	1	1	1	0	1	410	410	2.9	2.9	2.9	2.9	0	2.9	3840800	2585100	6213600	1785700
PH domain-containing protein	EHI_103720	C4LVL4	C4LVL4	24.7668	23.6612	24.4797	19	22.5862	22.3643	0.0876286	0.189209	3.50949			1	1	1	1	0	1	1	1	3.8	3.8	3.8	53.78	0	11.153	76905000	25	6	1	1	1	0	1	1	469	469	3.8	3.8	3.8	0	3.8	3.8	28547000	13266000	23395000	0
VWFA domain-containing protein	EHI_012170	C4LTL0	C4LTL0	23.533	20.5123	21.5286	19	19	19	0.0881251	0.190031	2.85797			3	1	2	1	1	0	0	3	8.1	8.1	8.1	50.337	0	3.4202	16658000	25	6	1	2	1	1	0	0	459	459	2.6	5.4	2.2	2.2	0	0	12138000	1495600	3025200	0
AP-2 complex subunit alpha	EHI_153240	A0A8U0WPD3	A0A8U0WPD3	27.2319	26.0329	26.4611	24.2296	19	21.5339	0.0893398	0.192397	4.96046			7	6	6	5	2	0	1	7	9.7	9.7	9.7	102.9	0	40.572	341370000	40	24	6	6	5	2	0	1	908	908	8.7	8	6.8	3.1	0	1.4	157620000	68655000	92382000	19672000
J domain-containing protein	EHI_188910	C4M2V8	C4M2V8	28.0368	25.4707	25.1005	22.9854	23.4636	22.7522	0.0899792	0.19352	2.97812			17	16	8	5	2	3	2	9	9.6	9.6	5.3	238.85	0	36.693	384780000	120	41	9	4	2	1	1	1	2111	2111	9	3.8	2.3	0.9	1.5	0.8	275369984	46500000	35974000	8304400
Uncharacterized protein	EHI_070680	C4M5S0	C4M5S0	27.464	25.4328	27.0804	24.7843	24.5559	23.9322	0.0909466	0.195345	1.98896			6	6	4	5	3	3	3	6	14.3	14.3	14.3	56.447	0	44.625	441900000	23	30	6	4	5	3	3	3	497	497	14.3	10.7	12.3	8.7	8.7	7.4	185130000	45293000	141910000	28894000
NAD(FAD)-dependent dehydrogenase, putative; Anaerobic glycerol-3-phosphate dehydrogenase subunit A, putative	EHI_099700	C4M6H3;B1N3H7	C4M6H3;B1N3H7	27.0832	25.5322	26.513	24.0661	19	19	0.091652	0.196602	4.84311			14	11	6	7	4	0	0	14	15.6	15.6	15.6	116.19	0	59.698	304040000	54	35	11	6	7	4	0	0	1066	NaN	11.4	8.8	9.5	5.3	0	0	142190000	48525000	95768000	17564000
Protein kinase domain containing protein	EHI_118810	C4LYM9;C4M423	C4LYM9	26.2505	24.345	25.2826	19	23.189	19	0.0918627	0.196797	4.19815			7	6	2	4	0	1	0	6	6.9	6.9	6.2	122.21	0	16.879	151520000	56	13	5	2	3	0	1	0	1070	NaN	5.7	2.1	4.4	0	0.8	0	79832000	21309000	40814000	0
Adapter-related protein complex 3 (AP-3) subunit, putative	EHI_083430	B1N424	B1N424	27.3313	25.2619	26.5458	23.979	19	23.356	0.0933212	0.199661	4.89014			9	6	3	3	1	0	1	9	11.2	11.2	11.2	97.903	0	7.753	334340000	34	17	6	3	3	1	0	1	855	855	9.1	2.9	3.3	0.8	0	0.8	168860000	40233000	97969000	16535000
Uncharacterized protein	EHI_050520	C4LTS5	C4LTS5	30.6492	29.2751	30.2884	28.8906	28.6335	28.2417	0.0936881	0.200185	1.30884			8	7	4	7	5	5	3	8	53.4	53.4	53.4	25.078	0	146.78	4876400000	13	77	7	4	7	5	5	3	223	223	49.3	21.5	49.3	25.6	35.4	14.8	1684000000	649670016	1311299968	497680000
Nucleoside diphosphate kinase, putative	EHI_104360	C4LZ47	C4LZ47	27.1774	27.7872	28.2787	26.9191	26.1273	24.0668	0.0942171	0.201054	1.22453			10	6	7	9	5	5	3	10	37	37	37	23.7	0	50.895	926800000	12	49	6	7	9	5	5	3	211	211	25.1	32.2	33.6	21.3	24.6	14.7	151780000	231620000	325630016	126900000
Aha1 domain protein, putative	EHI_065800	C4LZZ6	C4LZZ6	26.627	25.7131	25.7417	25.0798	25.1015	24.42	0.0943538	0.201084	0.936595			2	2	2	2	2	2	2	2	17.6	17.6	17.6	15.278	0	20.349	308660000	6	22	2	2	2	2	2	2	131	131	17.6	17.6	17.6	17.6	17.6	17.6	103640000	55006000	56106000	35463000
NADP-dependent alcohol dehydrogenase 3; Alcohol dehydrogenase 3, putative	ADH3	Q24857;B1N3M8	Q24857;B1N3M8	29.4729	27.1823	27.4975	23.8778	26.1574	24.9829	0.0946206	0.201265	3.0333			16	14	7	5	3	4	3	13	40.1	40.1	37.2	42.518	0	52.628	1210300000	18	55	11	6	5	3	4	3	384	NaN	37	18.8	14.3	8.6	10.9	8.9	745120000	152300000	189480000	15415000
Syntaxin binding protein, putative	EHI_093130	A0A8U0WPZ7	A0A8U0WPZ7	25.1575	25.024	25.4112	24.3344	24.868	23.7462	0.0946839	0.201265	0.596356			5	4	3	4	1	2	2	5	7.5	7.5	7.5	70.002	0	10.615	182010000	32	17	4	3	4	1	2	2	612	612	7.2	4.6	4.9	1.3	3.3	3.3	37424000	34117000	44621000	21154000
Haloacid dehalogenase-like hydrolase	EHI_151930	C4LSN2	C4LSN2	23.7139	23.2816	24.9974	22.2814	19	19	0.0948913	0.201444	3.35696			4	1	3	2	1	0	0	4	13.2	13.2	13.2	33.763	0	5.0422	62547000	13	7	1	3	2	1	0	0	303	303	2.6	10.2	5.6	2.6	0	0	13759000	10197000	33494000	5097500
Membrane-bound O-acyltransferase (MBOAT ) family protein	EHI_103460	C4LVJ0	C4LVJ0	29.004	26.4052	26.6543	22.8924	25.2021	22.8138	0.095018	0.201453	3.30727			5	5	3	3	2	2	1	5	8	8	8	55.586	0	17.176	786610000	18	33	5	3	3	2	2	1	473	473	8	6.6	6.6	4.4	4.4	1.7	538369984	88868000	105620000	7785700
Malic enzyme, putative	EHI_050330	B1N2J0;A0A8U0WNY6	B1N2J0;A0A8U0WNY6	29.9521	28.413	30.2483	28.0342	27.2358	26.8436	0.095755	0.202742	1.90282			24	23	15	17	8	11	9	24	50.9	50.9	50.9	53.333	0	278.75	3224800000	25	170	23	15	17	8	11	9	487	NaN	50.9	32.2	32	19.1	24.2	20.7	1038699968	357409984	1275399936	274870016
Signal peptidase complex subunit 2	EHI_105770	C4M9H4;C4LY73	C4M9H4;C4LY73	27.9813	25.4077	25.6894	22.6723	24.256	23.9208	0.0958729	0.202742	2.89528			5	5	3	3	1	3	2	5	26.1	26.1	26.1	19.511	0	12.175	406190000	9	23	5	3	3	1	3	2	165	NaN	26.1	20.6	20.6	7.3	20	13.9	264970000	44512000	54111000	6684200
Protein transport protein Sec24, putative	EHI_048310	A0A8U0WPL7	A0A8U0WPL7	23.6091	23.3625	23.5457	22.2379	19	19	0.0971844	0.20525	2.88683			4	2	2	4	1	0	0	4	6.3	6.3	6.3	98.035	0	10.592	40772000	37	9	2	2	4	1	0	0	876	876	3.4	3	6.3	1.4	0	0	12795000	10785000	12245000	4946100
Major facilitator superfamily protein	EHI_187120	C4LVS9	C4LVS9	24.6391	24.6504	23.5934	19	22.6916	19	0.0975155	0.205623	3.44853			1	1	1	1	0	1	0	1	2.3	2.3	2.3	58.771	0	10.025	71893000	17	7	1	1	1	0	1	0	516	516	2.3	2.3	2.3	0	2.3	0	26129000	26333000	12657000	0
Geranylgeranyl pyrophosphate synthetase, putative; Geranylgeranyl pyrophosphate synthase, putative	EHI_028880	B1N3Q9;C4M111;B1N3Y5	B1N3Q9;C4M111;B1N3Y5	26.014	25.4088	26.5797	25.1293	24.5702	23.6189	0.0976113	0.205623	1.15109			5	3	3	5	3	3	3	5	16.2	16.2	16.2	35.738	0	14.301	287090000	14	28	3	3	5	3	3	3	314	NaN	10.5	10.8	16.2	10.8	10.8	10.8	67761000	44547000	100300000	36700000
Ubiquitin carboxyl-terminal hydrolase	EHI_012290	C4LTM2	C4LTM2	23.7779	22.446	23.6396	21.8699	19	19	0.0979838	0.206092	2.85288			3	2	1	1	2	0	0	3	3.8	3.8	3.8	102.97	0.0044529	1.1537	36998000	44	5	2	1	1	2	0	0	880	880	2.7	1.5	1.5	2.5	0	0	14383000	5713900	13069000	3832700
Rho family GTPase	EHI_178680	C4LUT2	C4LUT2	26.9951	21.9437	22.6202	19	19	19	0.0981043	0.206092	4.853			4	4	1	1	0	0	0	4	18.8	18.8	18.8	23.19	0	3.5854	144240000	8	7	4	1	1	0	0	0	202	202	18.8	5.9	5.9	0	0	0	133760000	4033900	6447000	0
Serine carboxypeptidase (S28) family protein	EHI_054530	C4M2I4	C4M2I4	29.37	26.4244	26.9958	24.8723	24.7929	24.0165	0.0982107	0.206092	2.76413			9	9	4	5	3	3	3	9	24.2	24.2	24.2	53.075	0	198.99	994500000	18	42	9	4	5	3	3	3	466	466	24.2	12.4	13.5	9.7	9.7	9.7	693849984	90059000	133830000	30713000
Vacuolar protein sorting 35	EHI_002990	A0A8U0WP17;B1N3Q4	A0A8U0WP17	27.2425	25.0477	24.769	22.7311	23.6087	21.9057	0.0984383	0.206306	2.5165			7	7	4	3	1	1	1	7	11.5	11.5	11.5	87.16	0	55.989	245750000	43	19	7	4	3	1	1	1	757	NaN	11.5	5.8	4.2	1.6	1.6	1.6	158790000	34682000	28590000	6962100
Galactose-specific adhesin 170kD subunit	EHI_077500	C4M8N3	C4M8N3	32.9108	31.8567	32.5273	31.333	31.5921	30.9604	0.0986858	0.20656	0.969063			63	54	41	53	36	36	36	6	50	50	4.7	145.09	0	323.31	26186000000	73	566	2	3	3	2	0	3	1291	1291	43.5	34.5	41.1	33.8	33.5	34.2	8074999808	3888800000	6190099968	2704999936
Choline/ethanolamine kinase, putative	EHI_152340	C4LSS1	C4LSS1	26.9532	26.1912	25.1606	19	23.9554	19	0.0999933	0.208813	4.62392			6	4	4	2	0	1	0	6	17.2	17.2	17.2	44.426	0	22.38	260320000	20	14	4	4	2	0	1	0	383	383	12.8	9.1	5.2	0	2.9	0	129930000	76619000	37505000	0
Galactose-specific adhesin 170kD subunit, putative	EHI_042370	B1N559	B1N559	28.9562	27.2952	28.4317	26.4475	26.9174	25.8369	0.100017	0.208813	1.54523			5	4	3	3	2	1	1	4	46.1	4.6	4.6	142.58	0	95.78	1325800000	70	25	4	3	3	1	1	1	1270	1270	41.7	33.1	39.1	31.4	31.4	29.5	520809984	164690000	362070016	91515000
Peptidase C1A papain C-terminal domain-containing protein	EHI_093970	C4LYI8	C4LYI8	27.7415	26.5418	27.5254	26.3208	25.817	21.5513	0.100884	0.210358	1.20063			3	3	3	3	3	3	1	3	7.9	7.9	7.9	68.804	0	114.06	661290000	27	38	3	3	3	3	3	1	595	595	7.9	7.9	7.9	7.9	7.9	1.5	224400000	97694000	193190000	83822000
Ribosomal RNA-processing protein 12-like conserved domain-containing protein	EHI_092660	C4LV26	C4LV26	26.0054	25.0459	27.3363	24.1226	24.1258	23.0504	0.101343	0.211044	2.00499			13	4	4	11	4	3	2	13	12.5	12.5	12.5	128.81	0	32.84	316700000	59	34	4	4	11	4	3	2	1116	1116	4.6	3.9	10.8	4.5	3.1	2.1	67359000	34639000	169450000	18265000
Amino acid transporter, putative	EHI_115320	C4M8E3	C4M8E3	27.3096	26.0232	24.3157	22.9156	23.5326	19	0.102475	0.212995	2.65876			3	3	2	1	1	1	0	3	8.1	8.1	8.1	46.456	0	147.66	275470000	6	11	3	2	1	1	1	0	421	421	8.1	5.2	3.6	3.6	3.6	0	166350000	68198000	20881000	7912100
1,4-alpha-glucan branching enzyme	EHI_038160	B1N4C6;C4M384	B1N4C6;C4M384	24.2378	22.1981	23.9562	21.5843	21.5093	19	0.102539	0.212995	1.9172			1	1	1	1	1	1	0	1	2.6	2.6	2.6	66.153	0	3.2431	46999000	32	5	1	1	1	1	1	0	574	NaN	2.6	2.6	2.6	2.6	2.6	0	19783000	4811700	16275000	3144200
Rac-like GTP-binding protein RAC2, putative	EHI_013650	B1N5I9	B1N5I9	27.1209	26.7861	27.6589	26.5669	25.9153	25.3847	0.103024	0.213464	0.947524			1	1	1	1	1	1	1	1	4.6	4.6	4.6	27.619	0	3.9768	680090000	8	12	1	1	1	1	1	1	239	239	4.6	4.6	4.6	4.6	4.6	4.6	145950000	115720000	211920000	99413000
Type A flavoprotein, putative	EHI_159860	C4LX61	C4LX61	24.3555	23.413	24.3222	19	22.5866	21.8701	0.103025	0.213464	3.23689			1	1	1	1	0	1	1	1	3.4	3.4	3.4	46.743	0	25.804	63740000	17	6	1	1	1	0	1	1	413	413	3.4	3.4	3.4	0	3.4	3.4	21465000	11169000	20975000	0
Rab family GTPase	EHI_038680	A0A8U0WPK7	A0A8U0WPK7	25.6338	27.0999	27.4011	25.2437	24.8374	24.4057	0.103234	0.213627	1.67107			7	4	7	6	3	3	3	7	32.7	32.7	32.7	22.435	0	19.165	465070000	16	33	4	7	6	3	3	3	202	202	22.3	32.7	27.2	12.9	14.9	12.9	52066000	143840000	177240000	39728000
Malate dehydrogenase	EHI_067860	A0A8U0WPL4	A0A8U0WPL4	23.4182	22.5575	24.216	19	21.9511	21.8951	0.103487	0.213882	2.92167			2	2	1	2	0	1	1	2	9.1	9.1	9.1	36.107	0	33.845	44823000	15	10	2	1	2	0	1	1	329	329	9.1	5.2	9.1	0	5.2	5.2	11209000	6172800	19487000	0
Type A flavoprotein, putative	EHI_096710	B1N2F9	B1N2F9	32.2653	31.5345	32.8212	31.0131	31.1798	30.5511	0.105958	0.218714	1.11061			27	25	19	25	19	15	17	26	64.5	64.5	61.8	46.027	0	323.31	22034000000	23	468	24	18	24	18	14	16	406	406	63.3	49.8	63.1	53.9	41.1	44.8	5162200064	3110599936	7588800000	2167000064
Uncharacterized protein	EHI_069560	C4LWP4	C4LWP4	31.0654	28.9033	28.5856	26.3768	27.6063	25.9664	0.106346	0.219239	2.52658			6	6	4	4	3	3	4	6	24.6	24.6	24.6	22.832	0	107.5	3509000000	9	44	6	4	4	3	3	4	207	207	24.6	15.5	15.5	11.6	9.7	15.5	2247099904	502070016	402820000	87137000
Uncharacterized protein	EHI_164800	C4M1X3	C4M1X3	30.5444	29.6404	30.4119	28.9346	29.5227	28.5068	0.106526	0.219334	0.970268			24	20	17	19	17	20	16	24	31	31	31	100.72	0	301.82	5497200000	38	187	20	17	19	17	20	16	904	904	25	22.9	22.3	21.3	24.3	17.7	1566000000	836870016	1428499968	513070016
MRH domain-containing protein	EHI_096320	C4LWE5	C4LWE5	29.0763	27.4406	27.864	26.6402	26.7304	26.4013	0.107431	0.22092	1.44166			6	5	3	3	2	3	4	6	35.2	35.2	35.2	24.441	0	212.81	1297000000	10	40	5	3	3	2	3	4	219	219	35.2	21.5	21.5	15.1	21.5	24.7	566040000	182150000	244280000	104590000
Uncharacterized protein	EHI_155590	C4LWB0	C4LWB0	25.3136	23.3699	25.1289	19	22.8068	22.5335	0.107688	0.221172	3.70073			3	3	1	2	1	1	1	3	14.5	14.5	14.5	19.675	0	2.9906	102640000	12	13	3	1	2	1	1	1	172	172	14.5	4.7	10.5	4.7	4.7	4.7	41703000	10840000	36690000	0
C2 domain containing protein	EHI_059860	C4M344	C4M344	24.0881	23.9839	26.1346	22.8218	19	19	0.108202	0.221557	3.82465			3	1	2	3	2	0	0	3	20.2	20.2	20.2	22.138	0	11.122	115510000	7	10	1	2	3	2	0	0	208	208	6.7	11.5	20.2	15.4	0	0	17834000	16591000	73673000	7413900
Microsomal signal peptidase subunit, putative	EHI_121860	C4M5D2	C4M5D2	25.4039	22.2751	24.3264	21.8222	19	19	0.108266	0.221557	3.59072			2	2	1	2	1	0	0	2	17.9	17.9	17.9	19.535	0	11.685	74215000	8	9	2	1	2	1	0	0	168	168	17.9	8.9	17.9	8.9	0	0	44396000	5075600	21036000	3707900
Rap/Ran GTPase activating protein, putative	EHI_139960	C4M954	C4M954	25.6482	25.0166	26.2801	24.7643	24.1828	22.2954	0.108281	0.221557	1.17481			9	5	5	7	3	2	1	9	7.5	7.5	7.5	158.3	0	43.377	220710000	64	32	5	5	7	3	2	1	1362	1362	3.9	4.3	6	2.7	2	1	52588000	33943000	81489000	28496000
Translation initiation factor beta propellor-like domain-containing protein; RRM domain-containing protein	EHI_189410	C4M4M5;B1N2Z8	C4M4M5;B1N2Z8	25.0066	24.2931	25.4089	24.1381	23.4188	24.0435	0.109735	0.224252	1.12438			5	3	2	3	1	1	2	5	12.5	12.5	12.5	76.336	0	17.842	145780000	33	14	3	2	3	1	1	2	664	NaN	7.7	5.1	8.4	1.7	1.7	3.2	33708000	20556000	44549000	18463000
Guanine nucleotide exchange factor, putative	EHI_182740	C4LV55	C4LV55	23.7946	22.3881	23.9451	21.9818	19	19	0.109973	0.224461	2.88504			3	2	1	3	1	0	0	3	5.1	5.1	5.1	84.215	0	21.644	40333000	39	7	2	1	3	1	0	0	732	732	2.2	1.8	5.1	1.8	0	0	14551000	5489000	16151000	4141800
Rhodanese domain-containing protein	EHI_175400	C4M3A7	C4M3A7	25.39	23.3855	24.7347	22.7292	22.8471	22.6681	0.110164	0.224472	1.71523			3	3	1	2	1	2	1	3	4.4	4.4	4.4	108.27	0	4.7616	104010000	42	11	3	1	2	1	2	1	919	919	4.4	0.9	2.7	0.9	2.7	0.9	43969000	10958000	27919000	6953200
Uncharacterized protein	EHI_114780	C4M7T4	C4M7T4	26.9371	22.7894	23.0788	19	21.0528	19	0.110253	0.224472	4.24203			3	3	1	1	0	1	0	3	12.4	12.4	12.4	22.099	0	4.5768	146770000	11	9	3	1	1	0	1	0	185	185	12.4	4.9	4.9	0	4.9	0	128490000	7249000	8859700	0
acetyl-CoA carboxytransferase	EHI_082530	C4M6A4	C4M6A4	23.976	24.7484	26.1185	23.0893	23.1867	22.2039	0.111453	0.226508	1.80959			5	2	1	3	1	1	1	5	5.5	5.5	5.5	138.01	0	39.299	140840000	60	14	2	1	3	1	1	1	1244	1244	1.8	0.8	3.7	0.8	0.8	0.8	16500000	28184000	72853000	8924300
Uncharacterized protein	EHI_064670	C4M0D3;B1N5A0	C4M0D3;B1N5A0	26.6929	23.7849	25.9019	22.4091	23.2933	22.9225	0.111663	0.226508	2.60866			4	3	1	3	1	1	1	4	16.1	16.1	16.1	25.258	0	23.009	209430000	10	10	3	1	3	1	1	1	224	NaN	15.6	5.8	11.2	5.8	5.8	5.8	108480000	14453000	62697000	5569400
Beta-galactosidase, putative	EHI_170020	C4M1C4	C4M1C4	23.0527	21.3088	22.6406	19	21.0731	20.5307	0.111667	0.226508	2.29752			1	1	1	1	0	1	1	1	2.1	2.1	2.1	66.012	0.003881	1.2424	21558000	30	5	1	1	1	0	1	1	567	567	2.1	2.1	2.1	0	2.1	2.1	8701000	2597700	6538800	0
Sodium/sulfate symporter, putative	EHI_185600	C4M8D1	C4M8D1	27.142	23.8803	24.096	22.5973	19	22.5844	0.112937	0.228801	4.24078			4	4	1	1	1	0	1	4	5.6	5.6	5.6	77.562	0	6.3525	194110000	19	9	4	1	1	1	0	1	691	691	5.6	1.3	1.3	1.3	0	1.3	148100000	15441000	17931000	6345300
Gal/GalNAc lectin heavy subunit, putative	EHI_046650	C4M7A1	C4M7A1	27.9874	25.975	26.1925	24.6684	25.0614	23.9207	0.113403	0.229462	1.85337			13	9	5	6	4	5	2	13	12.3	12.3	12.3	134.78	0	54	486300000	64	38	9	5	6	4	5	2	1207	1207	9.4	4.3	5.9	3.8	5.3	2.1	266100000	65955000	76687000	26664000
Nitrogen fixation protein NifU	EHI_049620	A0A8U0WQ51	A0A8U0WQ51	26.4304	26.9117	28.0574	25.8596	25.6213	25.5117	0.113746	0.229874	1.39277			12	6	7	12	6	4	6	12	35.1	35.1	35.1	38.92	0	73.536	656360000	22	61	6	7	12	6	4	6	348	348	22.1	23	35.1	20.1	15.8	18.4	90438000	126250000	279329984	60884000
AP-2 complex subunit mu, putative; Clathrin coat assembly protein, putative	EHI_124560	B1N355;A0A8U0WQ23	B1N355;A0A8U0WQ23	27.6266	27.9552	28.9471	26.5678	27.2548	26.6878	0.114263	0.230635	1.26504			9	5	5	9	3	5	5	9	21.5	21.5	21.5	46.97	0	29.586	1352700000	26	52	5	5	9	3	5	5	414	NaN	13	12.1	21.5	7	11.4	12.1	207220000	260230000	517550016	99471000
Uncharacterized protein	EHI_069510	C4LWN9	C4LWN9	27.4829	26.035	25.03	24.5746	22.9135	23.1968	0.115098	0.232033	2.43862			4	3	2	2	2	1	1	4	43	43	43	17.044	0	59.72	333080000	8	18	3	2	2	2	1	1	149	149	34.9	17.4	25.5	16.1	8.1	8.1	187570000	68757000	34260000	24985000
Ral GTPase-activating protein subunit alpha/beta N-terminal domain-containing protein	EHI_170170	C4M1D9	C4M1D9	25.1651	22.1588	23.9648	21.7901	19	19	0.115676	0.232747	3.36786			5	3	1	2	1	1	1	5	5.5	5.5	5.5	125.96	0	51.679	62304000	56	9	3	1	2	1	1	1	1114	1114	3.1	1.3	2.4	1.3	1.3	1.3	37623000	4682200	16373000	3626300
SnoRNA binding protein, putative	EHI_183900	C4MAW3	C4MAW3	23.7129	23.6802	25.9352	22.702	21.5612	19	0.115735	0.232747	2.31119			4	2	2	4	1	1	0	4	13.1	13.1	13.1	56.533	0	11.503	101270000	25	13	2	2	4	1	1	0	503	503	8	8	13.1	2.6	5	0	13750000	13442000	64160000	6822900
Cysteine proteinase 2	CP2	Q01958	Q01958	30.0347	28.747	29.86	28.3823	28.4355	27.9638	0.116805	0.234611	1.13836			8	7	5	6	5	5	5	8	32.1	32.1	32.1	34.688	0	236.35	3499600000	17	109	7	5	6	5	5	5	315	315	29.5	26.7	28.3	25.7	21.6	26.3	1099900032	450529984	974449984	349889984
HEAT repeat domain containing protein	EHI_050150	C4LTQ2;B1N4N3;B1N4N2	C4LTQ2;B1N4N3;B1N4N2	26.5523	24.9554	26.7154	24.1179	24.7186	24.1653	0.117019	0.234753	1.65609			8	4	3	5	2	4	3	8	12	12	12	74.039	0	31.572	305760000	29	24	4	3	5	2	4	3	683	NaN	7.3	5.4	7.2	3.7	7.3	5.7	98408000	32533000	110190000	18206000
Rap/Ran GTPase-activating protein, putative	EHI_155710	C4LWC0	C4LWC0	24.0427	23.4583	24.5509	22.7467	19	19	0.119411	0.23926	3.14396			4	1	2	3	1	0	0	4	2.6	2.6	2.6	154.16	0.0019907	1.3636	60423000	74	7	1	2	3	1	0	0	1340	1340	0.6	1.2	2	0.6	0	0	17281000	11525000	24579000	7037600
Uncharacterized protein	EHI_178470	C4LUR3	C4LUR3	30.9031	30.3785	30.8504	30.3054	30.1548	29.5396	0.11958	0.239306	0.480543			23	18	15	20	16	15	15	23	33.9	33.9	33.9	97.82	0	323.31	8642400000	33	195	18	15	20	16	15	15	895	895	30.5	22.7	31.4	23	23.4	21	2008000000	1395900032	1935900032	1326899968
Nuclear transport receptor, putative	EHI_166900	C4LY94	C4LY94	26.6838	24.1434	25.0321	22.0902	23.6422	19	0.119797	0.23934	2.42026			9	8	5	4	1	3	0	9	11.5	11.5	11.5	105.62	0	43.866	178190000	36	27	8	5	4	1	3	0	911	911	10.5	7.2	6	1.2	4	0	107800000	18531000	34310000	4464900
TCTP domain-containing protein	EHI_021360	C4M051	C4M051	28.2371	23.8276	25.6398	19	23.0987	19	0.119959	0.23934	4.8522			5	5	1	1	0	1	0	5	40	40	40	19.05	0	54.471	392540000	6	12	5	1	1	0	1	0	170	170	40	17.6	17.6	0	17.6	0	316380000	14888000	52283000	0
Mitogen-activated protein kinase	EHI_073650	A0A8U0WPV9	A0A8U0WPV9	26.2363	24.6471	25.7655	21.9176	24.4031	24.0052	0.120035	0.23934	2.3893			5	4	2	3	2	2	1	5	15.3	15.3	15.3	40.016	0	11.465	205350000	22	20	4	2	3	2	2	1	352	352	12.8	6	8.2	6	4.8	2.3	79053000	26273000	57043000	3961500
Uncharacterized protein	EHI_098000	C4M497	C4M497	27.7133	26.0348	26.9492	21.929	25.5181	24.8719	0.120707	0.240389	3.17553			4	4	4	4	1	3	3	4	16.7	16.7	16.7	32.267	0	49.068	501120000	11	24	4	4	4	1	3	3	293	293	16.7	16.7	16.7	3.4	11.6	11.6	220060000	68745000	129570000	3992900
PH domain-containing protein	EHI_040420	C4M2H1	C4M2H1	23.915	22.9288	24.7771	19	22.4649	21.4838	0.121176	0.24103	3.14113			2	1	1	2	0	1	1	2	5.1	5.1	5.1	55.894	0	3.4185	61273000	19	8	1	1	2	0	1	1	509	509	2.9	2.9	5.1	0	2.9	2.9	15817000	7984400	28750000	0
Actin-related protein 2/3 complex subunit	EHI_094120	C4LYJ9;C4LTB5	C4LYJ9;C4LTB5	28.8689	24.8534	26.2893	23.4711	23.3996	22.9105	0.122676	0.243718	3.23521			8	8	3	4	2	2	2	8	23.5	23.5	23.5	40.565	0	102.92	633160000	21	32	8	3	4	2	2	2	366	NaN	23.5	11.5	14.8	7.4	7.4	5.7	490249984	30313000	82013000	11628000
Nucleotide binding protein 2, putative	EHI_000610	C4LZB2	C4LZB2	25.4572	23.3886	26.2901	23.0848	19	19	0.123907	0.245866	4.00293			5	4	2	5	2	0	0	5	22.3	22.3	22.3	29.287	0	12.663	148000000	14	13	4	2	5	2	0	0	273	273	16.1	9.9	22.3	9.9	0	0	46067000	10982000	82055000	8896300
Uncharacterized protein	EHI_194490	C4LZW1	C4LZW1	23.5881	23.2018	23.9213	23.1306	22.4365	19	0.125271	0.248272	0.786849			1	1	1	1	1	1	0	1	2.6	2.6	2.6	43.428	0.00075019	2.1757	53004000	20	7	1	1	1	1	1	0	382	382	2.6	2.6	2.6	2.6	2.6	0	12610000	9647700	15887000	9183300
Ras-GAP domain-containing protein	EHI_151460	C4LSI8	C4LSI8	25.4821	25.4612	26.8667	24.2643	19	19	0.126801	0.251001	4.30453			7	4	6	7	4	2	1	6	18.1	18.1	16.3	44.475	0	45.435	235590000	22	25	4	5	6	4	2	1	386	386	10.9	14.8	18.1	10.9	3.9	2.6	46868000	46195000	122370000	20150000
Cysteine proteinase, putative	EHI_010850	B1N5G3;A0A8U0WPR4	B1N5G3;A0A8U0WPR4	26.1006	24.5034	25.2509	24.3264	23.1081	22.71	0.127397	0.251877	1.56772			3	1	1	3	1	1	1	3	16.5	16.5	16.5	34.959	0	49.562	172610000	11	21	1	1	3	1	1	1	315	NaN	5.7	5.7	16.5	5.7	5.7	5.7	71956000	23782000	39929000	21037000
Elongator complex protein 2	EHI_111020	C4M5I3	C4M5I3	23.1499	22.4478	24.4041	22.0829	21.2356	21.0942	0.128432	0.253619	1.67464			6	2	3	5	2	1	2	6	10.7	10.7	10.7	80.663	0	18.387	46378000	38	13	2	3	5	2	1	2	722	722	3	4.8	8.9	3.6	1.2	3	9306900	5721000	22200000	4442500
Ras GTPase-activating protein, putative	EHI_156210	C4M4C1	C4M4C1	23.9452	23.6948	24.0732	22.9377	23.6377	22.7854	0.13005	0.256505	0.616709			1	1	1	1	1	1	1	1	1.7	1.7	1.7	88.502	0	3.505	75696000	39	6	1	1	1	1	1	1	769	769	1.7	1.7	1.7	1.7	1.7	1.7	16152000	13578000	17651000	8034300
Thioredoxin	EHI_004490	C4LYR0	C4LYR0	25.7552	25.1681	25.1467	24.578	21.9572	24.6074	0.130463	0.25701	2.08906			4	4	1	3	2	1	1	4	57.3	57.3	57.3	11.632	0	98.091	186160000	5	18	4	1	3	2	1	1	103	103	57.3	18.4	43.7	32	18.4	18.4	56637000	37700000	37146000	25045000
p-glycoprotein 6, putative	EHI_050640	B1N2J5	B1N2J5	28.7833	26.1926	25.9556	21.6207	25.1468	23.5835	0.13367	0.263012	3.59343			5	5	2	1	1	2	2	4	11.3	11.3	8.6	46.176	0	260.52	656720000	15	43	4	2	1	1	2	2	451	451	11.3	6.2	3.8	3.8	6.2	6.2	462009984	76693000	65076000	3224600
VWFA domain-containing protein	EHI_001100	C4M1J0	C4M1J0	26.7486	24.8547	25.0708	23.4826	24.2701	22.008	0.13475	0.26482	1.68167			5	4	4	3	1	1	1	5	20.7	20.7	20.7	54.893	0	77.927	214510000	23	20	4	4	3	1	1	1	489	489	17	14.9	11.2	3.5	3.5	3.5	112750000	30340000	35243000	11721000
Protein kinase, putative	EHI_135190	C4M105	C4M105	26.7863	24.8628	25.7645	24.3553	24.3394	23.3919	0.135165	0.265317	1.4572			4	4	2	2	1	1	1	4	6.3	6.3	6.3	100.79	0	86.584	256950000	35	16	4	2	2	1	1	1	895	895	6.3	4.2	4.2	1.7	1.7	1.7	115740000	30510000	57003000	21462000
14-3-3 protein 1	EHI_025360	P42648	P42648	25.7901	25.1718	25.383	19	24.1107	19	0.13552	0.265421	3.89296			6	5	4	5	0	3	0	6	43.9	31.4	31.4	27.338	0	19.344	157690000	17	18	5	4	5	0	3	0	239	239	39.7	25.9	35.6	0	24.7	5	58022000	37798000	43757000	0
T-cell immunomodulatory protein	EHI_009410	C4LZ19	C4LZ19	23.079	22.8531	23.7754	22.2901	19	19	0.135594	0.265421	2.59075			2	1	1	2	1	0	0	2	3.7	3.7	3.7	67.705	0.00069881	1.7059	35924000	22	4	1	1	2	1	0	0	601	601	1.3	1.3	3.7	1.3	0	0	8860800	7576500	14358000	5128600
Ras guanine nucleotide exchange factor, putative	EHI_143100	C4MAJ3	C4MAJ3	27.2213	25.6722	26.3343	25.1831	25.2818	23.732	0.135703	0.265421	1.17682			7	6	5	5	2	2	2	7	11.1	11.1	11.1	86.331	0	23.249	387370000	42	31	6	5	5	2	2	2	763	763	9	8.1	8.1	3	3	3	156470000	53470000	84609000	38096000
Filamin 2, putative; Actin binding protein, putative	EHI_104630	C4LZ72;B1N322	C4LZ72;B1N322	27.5649	26.1608	26.9939	24.6017	26.1058	25.4962	0.136726	0.266891	1.55278			10	8	5	7	3	4	4	10	16.2	16.2	16.2	95.394	0	54.624	552220000	35	45	8	5	7	3	4	4	857	NaN	13.8	6.9	10.6	4.4	5.8	5.5	198550000	75020000	133650000	25460000
Eukaryotic translation initiation factor 5A	EHI_186480	C4LVN8;C4LSM2	C4LVN8;C4LSM2	24.6247	24.9148	25.2406	24.3698	24.5271	23.5394	0.136934	0.266891	0.478297			4	2	2	3	3	3	2	4	28	28	28	17.132	0	4.4011	155190000	10	16	2	2	3	3	3	2	157	NaN	12.7	9.6	23.6	20.4	20.4	15.3	25869000	31631000	39645000	21679000
40S ribosomal protein S26	EHI_158550	C4M7G9;C4M123;C4LZS2	C4M7G9;C4M123;C4LZS2	26.5461	25.3765	26.1372	19	24.5313	19	0.136942	0.266891	4.25428			2	2	1	1	0	1	0	2	14.6	14.6	14.6	16.415	0	3.7743	239600000	6	8	2	1	1	0	1	0	144	NaN	14.6	6.2	6.2	0	6.2	0	97988000	43560000	73803000	0
Transmembrane protein 231	EHI_030410	C4M454	C4M454	26.7366	23.8373	23.099	21.2891	21.9643	19	0.137415	0.267494	2.93095			3	2	1	1	1	1	0	3	6.4	6.4	6.4	39.817	0.00075188	2.1973	142440000	18	7	2	1	1	1	1	0	343	343	4.4	2	2	2	2	0	111820000	14988000	8984600	2562500
EhCdc50 protein	EhCdc50	C4M6E4	C4M6E4	24.9929	23.0079	23.2115	22.4182	19	19	0.138888	0.270042	3.02833			2	2	1	1	1	0	0	2	7.6	7.6	7.6	35.746	0	13.744	57142000	15	5	2	1	1	1	0	0	316	316	7.6	3.5	3.5	3.5	0	0	33389000	8434700	9713300	5604700
60S acidic ribosomal protein P0	EHI_090400	B1N2Z3	B1N2Z3	27.033	26.2984	27.7038	26.2218	25.3339	24.6494	0.140523	0.272898	1.23389			6	5	3	4	2	2	1	6	25.3	25.3	25.3	34.345	0	32.395	585320000	13	24	5	3	4	2	2	1	316	316	14.6	10.4	22.2	7.6	7.6	3.5	137320000	82530000	218610000	78261000
26S protease regulatory subunit, putative; 26S protease regulatory subunit S10B, putative	EHI_194570	C4LZW8;B1N363	C4LZW8;B1N363	25.7144	22.5903	26.0806	22.6941	19	19	0.1408	0.273111	3.94806			5	3	3	2	1	0	0	4	12.8	12.8	9.7	44.21	0	8.5043	139120000	23	14	2	3	1	0	0	0	391	NaN	11	7.9	6.9	3.1	0	0	55058000	6314800	70963000	6785800
Actin binding protein, putative	EHI_104390	C4LZ50;B1N321	C4LZ50	27.5037	23.9956	24.6777	19	23.4377	19	0.148597	0.287896	4.17348			10	8	2	2	0	4	0	10	23.2	23.2	23.2	64.44	0	42.952	245230000	22	20	8	2	2	0	4	0	590	NaN	19	4.4	4.6	0	10.8	0	190300000	16726000	26837000	0
Calponin homology domain protein, putative; Alpha-actinin, putative	EHI_199000	C4LWU6;B1N3L1	C4LWU6;B1N3L1	28.7516	26.5846	27.1542	25.1902	26.2365	24.4189	0.149035	0.288404	1.78347			16	14	5	7	4	4	3	16	32.3	32.3	32.3	69.795	0	146.05	841720000	37	54	14	5	7	4	4	3	619	NaN	27.6	8.9	14.2	7.6	8.2	6.1	451950016	100640000	149360000	38283000
COP9 signalosome complex subunit 3, putative	EHI_103560	C4LVK0	C4LVK0	25.3416	23.2681	24.6391	22.1255	23.2637	22.9872	0.149513	0.288988	1.72168			3	3	2	3	1	2	2	3	9.5	9.5	9.5	45.022	0	13.315	101710000	22	15	3	2	3	1	2	2	389	389	9.5	6.2	9.5	3.1	6.2	6.2	42518000	10102000	26128000	4575400
Phospholipase B-like	EHI_114320	C4M8M7	C4M8M7	24.6627	23.762	25.0615	23.4046	19	19	0.150584	0.290716	3.29311			2	1	1	2	1	0	0	2	5.3	5.3	5.3	63.371	0	6.2381	86905000	25	7	1	1	2	1	0	0	550	550	1.8	1.8	5.3	1.8	0	0	26559000	14226000	35015000	11104000
Uncharacterized protein	EHI_199720	B1N425;B1N3Z6	B1N425;B1N3Z6	28.1667	25.6049	26.4532	19	25.0777	24.3481	0.152461	0.293889	4.70273			8	8	6	6	0	3	1	8	19.2	19.2	19.2	48.641	0	65.45	500980000	24	32	8	6	6	0	3	1	416	NaN	19.2	16.8	15.6	0	7.7	2.4	301310016	51032000	91875000	0
Ras guanine nucleotide exchange factor, putative	EHI_131260	C4LXJ2	C4LXJ2	23.899	24.3001	23.9855	24.7227	24.2746	22.1552	0.152849	0.293889	-0.437102			7	2	4	3	4	4	1	7	6.3	6.3	6.3	141.7	0	18.288	105560000	58	20	2	4	3	4	4	1	1226	1226	2.2	3.5	3.5	3.8	3.8	0.9	15643000	20657000	16609000	27686000
Heat shock protein 90, putative	EHI_102270	C4MBP1;C4LVB2	C4MBP1;C4LVB2	28.2615	27.8175	29.4168	26.4775	27.6468	26.6266	0.152862	0.293889	1.43646			13	8	8	13	6	8	6	12	19.8	19.8	19.6	82.992	0	182.65	1682200000	36	79	8	8	12	6	8	6	718	NaN	12.8	12.8	19.8	9.3	12.8	10	321790016	236540000	716689984	93439000
Exportin-T	EHI_029040	C4M4W8	C4M4W8	24.9241	24.5064	24.345	23.5995	19	22.3376	0.152944	0.293889	3.29208			5	4	3	2	2	0	1	5	6.3	6.3	6.3	105.41	0	10.179	94985000	45	13	4	3	2	2	0	1	921	921	5.1	4.2	3.3	3.1	0	1	31834000	23832000	21309000	12710000
Sulfate adenylyltransferase	AS	O76156	O76156	24.2691	24.1577	23.4677	19	23.0524	19	0.153235	0.294104	2.93863			3	1	1	2	0	1	0	3	7.6	7.6	7.6	47.927	0	3.6031	59232000	26	5	1	1	2	0	1	0	423	423	2.1	2.8	4.7	0	2.1	0	20217000	18715000	11601000	0
ATP-dependent 6-phosphofructokinase	PPi-PFK	Q27651;C4M3U3;C4LVS1	Q27651	26.014	23.9502	25.2278	23.4162	23.7285	23.1151	0.153619	0.294495	1.49165			4	3	2	3	2	2	2	4	10.3	10.3	10.3	47.669	0	5.3317	157440000	23	17	3	2	3	2	2	2	436	NaN	6.2	3.9	8.5	3.9	3.9	3.9	67764000	16208000	39293000	11194000
Rab family GTPase	EHI_129740	A0A8U0WPU8	A0A8U0WPU8	26.691	24.673	26.2014	21.5134	24.7476	24.4766	0.154461	0.295765	2.72469			5	5	3	4	1	1	1	4	33.2	33.2	27.7	22.076	0	37.546	266760000	13	21	4	2	3	0	1	1	202	202	33.2	20.8	26.2	5.4	5.4	5.4	108340000	26749000	77165000	2993400
UDP-galactose transporter-related protein 1, putative	EHI_041050	B1N4Q4	B1N4Q4	26.8535	24.474	22.4578	19	22.3756	19	0.155097	0.296637	3.90733			2	2	2	1	0	1	0	2	6.9	6.9	6.9	38.38	0	16.981	155760000	11	7	2	2	1	0	1	0	335	335	6.9	6.9	4.2	0	2.7	0	121260000	23303000	5760700	0
Adaptor protein (AP) family protein	EHI_049590	C4LUG0	C4LUG0	23.1266	21.8262	23.58	21.5739	21.5511	19	0.155335	0.296746	1.28173			1	1	1	1	1	1	0	1	1.9	1.9	1.9	84.114	0	7.696	31610000	31	5	1	1	1	1	1	0	735	735	1.9	1.9	1.9	1.9	1.9	0	9157700	3718300	12540000	3121800
C2 NT-type domain-containing protein	EHI_169670	C4M8U8;C4LXQ5	C4M8U8	24.8678	23.9767	25.6671	23.7059	23.6084	23.1375	0.15837	0.302192	1.18006			4	2	1	3	1	1	1	4	4.9	4.9	4.9	98.706	0	16.35	136100000	46	11	2	1	3	1	1	1	863	NaN	2.9	1.6	3.6	1.6	1.6	1.6	30616000	16509000	53279000	13683000
Uncharacterized protein	EHI_068370	C4LU30	C4LU30	25.4617	23.053	22.4119	19	22.0845	19	0.158778	0.302619	3.09995			4	3	1	1	0	1	0	4	11.2	11.2	11.2	52.804	0	7.1372	64940000	26	6	3	1	1	0	1	0	466	466	8.2	2.6	3	0	2.8	0	46210000	8702500	5580400	0
Hypothetical membrane-spanning protein	EHI_025380	C4M325	C4M325	24.1438	23.5361	24.0573	23.3408	23.538	22.7617	0.161588	0.307617	0.472997			3	1	1	2	2	1	1	3	6.2	6.2	6.2	48.758	0.00071788	1.9031	78073000	21	15	1	1	2	2	1	1	421	421	1.7	1.7	4	3.8	1.7	1.7	18536000	12164000	17457000	10624000
40S ribosomal protein S17, putative	EHI_037130	C4M7N8;C4M0Z2	C4M7N8;C4M0Z2	26.641	25.0944	24.6358	24.1684	23.8261	23.303	0.163052	0.309739	1.45981			2	2	2	1	1	1	1	2	10.3	10.3	10.3	13.605	0	3.0885	210620000	7	10	2	2	1	1	1	1	117	NaN	10.3	10.3	10.3	9.4	9.4	9.4	104650000	35824000	26069000	18855000
Actinin-like protein, putative	EHI_155290	C4LW82	C4LW82	22.7296	24.6968	26.3404	22.8927	19	19	0.16308	0.309739	3.64258			5	1	3	4	1	0	0	5	9	9	9	58.243	0	13.757	126900000	26	9	1	3	4	1	0	0	500	500	1.8	5.6	7.2	1.8	0	0	6955100	27194000	84965000	7787300
40S ribosomal protein S8	EHI_029350	C4MAX2;C4M8Y8;C4M0Q2	C4MAX2;C4M8Y8;C4M0Q2	25.8426	24.1419	26.1814	19	24.1512	20.5819	0.164929	0.312889	3.81304			6	5	3	6	0	3	2	6	35.3	35.3	35.3	23.372	0	11.817	174990000	11	20	5	3	6	0	3	2	204	NaN	31.4	16.7	35.3	0	16.7	12.3	60174000	18511000	76101000	0
E3 ubiquitin-protein ligase	EHI_050540	C4LTS7	C4LTS7	25.6923	24.8444	25.511	24.3377	19	22.8223	0.165529	0.313664	3.68037			1	1	1	1	1	0	1	1	1.3	1.3	1.3	87.98	0.010059	0.84239	160780000	39	7	1	1	1	1	0	1	756	756	1.3	1.3	1.3	1.3	0	1.3	54219000	30124000	47815000	21202000
Acyl-CoA synthetase, putative	EHI_153060	C4LS98	C4LS98	27.9237	25.3938	25.9082	24.0888	24.95	22.94	0.168956	0.319789	1.88913			8	8	5	5	2	3	3	8	13.6	13.6	13.6	72.691	0	26.931	419960000	38	42	8	5	5	2	3	3	645	645	13.6	10.4	10.4	3.1	6.8	6.8	254600000	44084000	62971000	17842000
40S ribosomal protein S14, putative	EHI_012360	B1N2I3	B1N2I3	27.8236	27.464	29.1107	27.0294	26.9091	26.3784	0.169907	0.321218	1.1635			8	6	6	8	3	1	2	8	48.6	48.6	48.6	15.641	0	25.542	1352600000	7	47	6	6	8	3	1	2	146	146	46.6	45.2	48.6	24.7	8.2	15.8	237540000	185130000	579670016	136980000
Vacuolar sorting protein 39/Transforming growth factor beta receptor-associated domain-containing protein	EHI_007010	C4M0H4	C4M0H4	25.2811	23.0426	25.262	23.3295	19	19	0.171039	0.322987	3.36384			6	4	2	4	2	1	0	6	6.3	6.3	6.3	143.82	0	30.024	100190000	62	16	4	2	4	2	1	0	1235	1235	4.5	2.9	4.9	2.1	1.1	0	40774000	8640100	40237000	10541000
Putative peroxiredoxin; Peroxiredoxin, putative	EHI_	P19476;C4M3Q0;C4MBP3;B1N623;B1N5L9;B1N5Y9	P19476;C4M3Q0;C4MBP3;B1N623;B1N5L9;B1N5Y9	33.1339	32.6432	33.7742	32.3347	32.5099	31.7645	0.173065	0.326437	0.761487			21	18	17	19	15	13	18	0	51.9	51.9	0	26.253	0	207.19	46005000000	13	377	0	0	0	0	0	0	233	NaN	48.9	48.9	50.6	42.1	39.1	43.3	9425300480	6707999744	14691000320	5416500224
Grainin 1	EHI_167300	C4MAF9	C4MAF9	32.4286	29.6177	29.4198	26.8352	28.9109	28.4998	0.174009	0.327839	2.61568			12	11	9	7	3	9	8	9	55.3	55.3	44.2	24.285	0	299.11	8326700000	13	99	8	7	4	2	6	6	215	215	51.6	47.4	34.4	18.1	43.3	41.9	5780800000	823779968	718209984	119730000
Glycerophosphocholine acyltransferase 1	EHI_019090	C4M896	C4M896	27.9446	25.6658	25.508	23.6806	25.0394	23.7295	0.174402	0.328204	2.0128			1	1	1	1	1	1	1	1	2.6	2.6	2.6	41.785	0	2.9206	421110000	8	13	1	1	1	1	1	1	352	352	2.6	2.6	2.6	2.6	2.6	2.6	258320000	53233000	47716000	13445000
PCI domain containing protein	EHI_174890	C4LZL4	C4LZL4	24.1989	23.119	22.5538	22.1572	22.2232	21.0749	0.175786	0.33043	1.10034			4	3	2	1	1	1	1	4	9.6	9.6	9.6	49.8	0	3.847	46307000	26	9	3	2	1	1	1	1	429	429	7.2	4.7	2.3	2.3	2.3	2.3	19257000	9110100	6156900	4677300
GTPase-activator protein for Ras family GTPase	EHI_017630	C4M3G8	C4M3G8	25.5699	26.217	26.5147	26.8782	26.632	26.2172	0.176346	0.331102	-0.654567			4	1	3	2	4	4	4	4	13.2	11.5	11.5	45.552	0	28.379	529050000	19	31	1	3	2	4	4	4	393	393	3.3	10.7	8.4	11.5	11.5	11.5	49808000	78000000	95881000	123350000
Superoxide dismutase [Fe]; Superoxide dismutase	SODB	P34107;C4LX20	P34107;C4LX20	25.9434	24.079	25.5689	24.3065	22.9698	19	0.17741	0.33272	1.55902			2	2	1	2	2	1	0	2	10	10	10	22.06	0	7.6826	160990000	13	10	2	1	2	2	1	0	190	NaN	10	3.7	10	10	3.7	0	64529000	17722000	49775000	20748000
phospholipase A2	EHI_050610	C4LTT3	C4LTT3	24.3758	23.5658	24.0634	19	23.3034	19	0.179176	0.335649	2.84996			1	1	1	1	0	1	0	1	1.5	1.5	1.5	73.988	0.0032552	1.2911	62070000	32	4	1	1	1	0	1	0	650	650	1.5	1.5	1.5	0	1.5	0	21769000	12417000	17531000	0
NEDD8-activating enzyme E1 regulatory subunit	EHI_000900	C4M1I1	C4M1I1	25.3436	23.2598	24.4289	19	23.3999	19	0.18167	0.339933	3.14414			3	3	1	2	0	2	1	3	7.2	7.2	7.2	59.119	0	26.994	86273000	28	12	3	1	2	0	2	1	514	514	7.2	1.4	4.3	0	4.3	2.9	42577000	10044000	22585000	0
Uncharacterized protein	EHI_137110	C4M5Y9	C4M5Y9	27.7339	25.2647	23.0531	19	23.4151	19	0.182573	0.341062	4.14304			4	4	3	1	0	2	0	4	19.4	19.4	19.4	30.488	0	40.382	283420000	17	20	4	3	1	0	2	0	273	273	19.4	16.8	7.7	0	9.2	0	223220000	40311000	8703400	0
Ras-GAP domain-containing protein	EHI_002150	B1N462	B1N462	26.6525	26.7155	27.3519	25.8902	19	24.72	0.18269	0.341062	4.46155			4	3	1	2	1	1	1	4	4.3	4.3	4.3	116	0	3.0319	476810000	52	20	3	1	2	1	1	1	1016	1016	3	0.7	2.1	0.7	0.7	0.7	105490000	110200000	171290000	62191000
Purine nucleoside phosphorylase, putative	EHI_048740	C4M2Y7	C4M2Y7	26.2306	27.5991	28.3022	26.4096	21.4624	24.8369	0.184432	0.343924	3.44128			8	3	6	8	4	2	4	8	31.2	31.2	31.2	35.129	0	102.49	735040000	17	40	3	6	8	4	2	4	320	320	12.8	25.3	31.2	16.2	9.4	18.1	78740000	203310000	330990016	89142000
Mannose-P-dolichol utilization defect 1 protein homolog	EHI_035970	C4M7F6	C4M7F6	29.7983	27.0506	27.6665	25.8125	26.7074	24.8615	0.187869	0.349935	1.9119			3	3	3	2	2	2	1	3	19.8	19.8	19.8	24.072	0	66.978	1484700000	5	28	3	3	2	2	2	1	212	212	19.8	19.8	10.4	10.4	10.4	5.2	933660032	139010000	213040000	58928000
Uncharacterized protein	EHI_153740	C4LSF4	C4LSF4	25.6176	24.2775	23.5147	19	23.5746	21.7081	0.189132	0.351888	3.18264			1	1	1	1	0	1	1	1	7.3	7.3	7.3	15.766	0	2.5813	99723000	5	9	1	1	1	0	1	1	137	137	7.3	7.3	7.3	0	7.3	7.3	51483000	20336000	11985000	0
Uncharacterized protein	EHI_194550	C4LZW6;C4M191	C4LZW6;C4M191	22.9136	22.2216	23.2761	21.4549	22.3756	21.7483	0.190071	0.353234	0.888527			2	1	1	2	1	1	1	2	6.7	6.7	6.7	39.787	0	8.9152	34789000	13	7	1	1	2	1	1	1	342	NaN	4.4	4.4	6.7	4.4	4.4	4.4	7900900	4890800	10158000	2874500
Rho GTPase activating protein, putative	EHI_187110	C4LVS8	C4LVS8	23.8664	22.4398	23.8481	22.6957	19	19	0.190747	0.35409	2.5369			2	1	1	2	1	0	0	2	3.1	3.1	3.1	105	0	6.5335	42876000	37	5	1	1	2	1	0	0	894	894	1	1	3.1	1	0	0	15293000	5689100	15101000	6793500
Galactose-inhibitable lectin small subunit, putative	EHI_159870	B1N2V4	B1N2V4	25.5378	23.6219	25.8144	23.1576	23.7449	23.1284	0.191469	0.354993	1.5401			3	2	2	3	2	2	2	3	14	14	14	30.789	0	19.497	153220000	15	19	2	2	3	2	2	2	257	257	9.3	9.3	14	9.3	9.3	9.3	48714000	12909000	59007000	9357100
Vacuolar sorting protein 26, putative	EHI_008470	B1N392;A0A8U0WP80	B1N392;A0A8U0WP80	24.9996	24.8473	26.1641	24.777	23.4175	21.4521	0.191666	0.354993	1.23973			3	2	3	2	3	3	1	3	10.8	10.8	10.8	33.312	0	13.15	181740000	14	17	2	3	2	3	3	1	287	NaN	6.6	10.8	6.6	10.8	10.8	4.2	33546000	30184000	75191000	28749000
4Fe-4S ferredoxin-type domain-containing protein (Fragment)	EHI_154450	B1N5A6	B1N5A6	27.1151	23.781	26.0184	23.995	22.7744	23.9976	0.192632	0.35638	2.25343			7	7	2	2	1	1	1	7	35.9	35.9	35.9	27.133	0	17.193	268390000	15	14	7	2	2	1	1	1	245	245	35.9	11.4	11.4	4.1	6.5	4.1	145360000	14414000	67971000	16719000
Transporter major facilitator family; Transporter, major facilitator family	EHI_015010	B1N5W6;C4M4T5;C4LY68	B1N5W6;C4M4T5;C4LY68	22.4147	24.0102	23.7399	19	22.6987	19	0.193066	0.35678	2.53891			2	1	1	1	0	1	0	2	7.1	7.1	7.1	32.795	0.00070472	1.7888	43303000	9	4	1	1	1	0	1	0	294	NaN	4.8	2.4	2.4	0	2.4	0	5591000	16896000	14009000	0
V-type proton ATPase subunit a	EHI_074020	C4M2Z1	C4M2Z1	27.9822	25.5959	25.4395	23.6968	25.0587	23.9882	0.194261	0.358384	1.96145			9	8	4	3	1	2	2	9	13.6	13.6	13.6	92.694	0	56.287	426540000	31	28	8	4	3	1	2	2	803	803	12.3	5.7	4.1	1.5	2.9	2.9	265140000	50713000	45504000	13597000
Inositol polyphosphate 5-phosphatase, putative	EHI_079220	C4M7S4	C4M7S4	19	19	22.713	22.9099	22.8884	21.8559	0.19437	0.358384	-2.66149			1	0	0	1	1	1	1	1	1.6	1.6	1.6	77.354	0	3.862	26316000	35	5	0	0	1	1	1	1	675	675	0	0	1.6	1.6	1.6	1.6	0	0	6875500	7881000
RGS domain-containing protein	EHI_160870	C4M2Q5	C4M2Q5	25.4004	24.1971	26.5806	24.0455	23.7805	22.5245	0.196385	0.359536	1.47971			8	4	2	7	2	2	1	8	14	14	14	82.99	0	34.542	201640000	38	20	4	2	7	2	2	1	724	724	9.4	2.6	13	2.2	2.2	1.2	44288000	19233000	100360000	17315000
Uncharacterized protein	EHI_118070	C4LYZ1	C4LYZ1	26.2955	23.1739	24.385	22.8841	22.4351	22.2821	0.196926	0.359536	1.95855			5	4	1	2	1	1	1	5	9	9	9	86.614	0	32.769	132250000	32	14	4	1	2	1	1	1	767	767	6.9	2	4	2	2	2	82366000	9463200	21909000	7740900
inositol-3-phosphate synthase	EHI_070720	C4M5S9;B1N3E8	C4M5S9;B1N3E8	27.8124	25.5417	26.4942	24.6859	25.5474	25.2926	0.197418	0.359536	1.49946			12	9	4	5	1	1	3	12	23.2	23.2	23.2	56.543	0	32.995	496200000	31	29	9	4	5	1	1	3	508	NaN	17.3	8.9	10.6	2.4	2.4	5.9	235710000	48844000	94526000	26990000
Glycosyltransferase	EHI_166360	C4M7E3;C4LTN3	C4M7E3	25.8964	23.146	24.8144	22.4023	23.2852	19	0.199994	0.359536	1.77519			5	4	2	2	1	1	0	5	17.5	17.5	17.5	40.765	0	9.8922	117010000	13	11	4	2	2	1	1	0	349	NaN	14.6	6.6	6.9	3.7	2	0	62458000	9281800	29503000	5543100
Ubiquitin-conjugating enzyme family protein	EHI_048700	C4M2Y3	C4M2Y3	23.329	25.3706	26.8508	19	23.9463	19	0.200092	0.359536	3.71031			3	1	2	3	0	2	0	2	13.3	13.3	8.5	18.616	0	2.3461	191110000	5	12	0	1	2	0	1	0	165	165	4.8	9.1	13.3	0	9.1	0	10537000	43382000	121030000	0
EamA domain-containing protein	EHI_006940	C4M0G7	C4M0G7	30.2854	28.56	27.8763	26.5463	27.8822	26.5617	0.205545	0.359536	1.69294			9	7	8	5	3	5	4	9	14.7	14.7	14.7	41.208	0	71.85	2395200000	12	49	7	8	5	3	5	4	368	368	14.7	14.7	12.8	7.6	10.3	8.2	1308600064	395750016	246370000	98004000
Ras guanine nucleotide exchange factor, putative	EHI_164860	C4M1X9;C4LYB7	C4M1X9;C4LYB7	23.1376	22.7473	24.081	22.7994	19	19	0.20597	0.359536	2.42227			2	1	1	2	1	0	0	2	1.6	1.6	1.6	111.27	0.0097621	0.98489	41315000	53	5	1	1	2	1	0	0	970	NaN	0.7	0.7	1.6	0.7	0	0	9228400	7040700	17746000	7299700
t-SNARE coiled-coil homology domain-containing protein	EHI_107040	A0A8U0WP02	A0A8U0WP02	25.6428	25.026	24.2156	24.3187	19	19	0.206064	0.359536	3.3021			5	3	3	3	1	0	0	5	14.2	14.2	14.2	31.772	0	7.6183	126960000	13	11	3	3	3	1	0	0	275	275	9.8	9.8	11.6	2.5	0	0	52392000	34164000	19481000	20925000
Uncharacterized protein	EHI_135090	C4M0Z5	C4M0Z5	33.8386	30.8688	31.8589	30.0235	30.6545	29.7161	0.206493	0.359536	1.8498			5	5	5	5	5	5	5	5	11.4	11.4	11.4	41.97	0	323.31	24881000000	10	110	5	5	5	5	5	5	367	367	11.4	11.4	11.4	11.4	11.4	11.4	15361999872	1960800000	3894899968	1091399936
Protein kinase, putative	EHI_057680	C4M700	C4M700	24.7075	25.714	23.8268	24.0685	19	19	0.208979	0.359536	3.21516			5	3	3	3	1	0	0	5	6.8	6	6	122.12	0	17.911	114910000	54	9	3	3	3	1	0	0	1061	1061	5.3	3	4.1	0.7	0	0	27397000	55039000	14879000	17593000
Zinc transporter, putative	EHI_069990	C4MA64	C4MA64	22.4274	21.5047	19	22.9255	23.2547	19	0.209748	0.359536	-2.11273			2	1	1	0	1	1	0	2	4.6	4.6	4.6	49.488	0	5.166	26590000	16	6	1	1	0	1	1	0	439	439	2.5	2.5	0	2.1	2.1	0	5640500	2975400	0	7966400
Uncharacterized protein	EHI_040440	C4M2H3	C4M2H3	28.1766	27.0431	28.386	26.7768	27.1834	26.1603	0.210445	0.359536	0.888505			16	12	8	12	8	9	6	16	20.9	20.9	20.9	99.946	0	137.43	1134900000	36	79	12	8	12	8	9	6	903	903	18.1	9.1	16.4	9.4	11.8	7.1	303400000	138290000	350790016	114980000
Transmembrane protein	EHI_109990	C4M3L7	C4M3L7	27.8632	26.6604	27.6649	26.8582	26.2859	25.8448	0.21502	0.359536	0.824174			7	5	3	6	4	3	5	7	25	25	25	27.054	0	77.216	826760000	13	38	5	3	6	4	3	5	236	236	24.6	16.5	25	19.9	16.5	20.3	244150000	106070000	212800000	121650000
Galactose-inhibitable lectin, putative	EHI_058330	C4M5G9;B1N3E1;B1N419	C4M5G9	26.126	24.346	25.9077	23.9734	24.5819	23.9432	0.216873	0.359536	1.18224			1	1	1	1	1	1	1	0	8.1	3.7	0	31.626	0	6.4517	215220000	17	10	0	0	0	0	0	0	271	NaN	8.1	8.1	8.1	8.1	8.1	8.1	73234000	21325000	62950000	16471000
Calcium-regulated actin-bundling protein C-terminal domain-containing protein	EHI_086690	C4M8Z5;C4LYR5	C4M8Z5;C4LYR5	26.5728	25.8086	28.0065	25.904	24.792	23.9845	0.21706	0.359536	1.44796			10	3	5	9	6	3	1	6	27.5	27.5	20.4	42.013	0	75.572	536680000	17	44	3	3	6	3	2	1	382	NaN	14.4	19.1	27.5	19.6	13.4	3.9	99820000	58770000	269649984	62790000
PUL domain-containing protein	EHI_024560	C4M0J8	C4M0J8	22.5068	22.4568	22.0698	22.0764	19	19	0.217393	0.359536	1.80626			2	1	1	2	1	0	0	2	6.7	6.7	6.7	38.237	0	3.721	20541000	11	5	1	1	2	1	0	0	341	341	3.5	3.2	6.7	3.2	0	0	5959500	5756500	4402200	4422300
TLDc domain-containing protein	EHI_074070	C4M2Z6	C4M2Z6	22.8081	19	22.814	19	19	19	0.219102	0.359536	2.54068			1	1	0	1	0	0	0	1	7.7	7.7	7.7	21.235	0	7.6306	14717000	11	1	1	0	1	0	0	0	181	181	7.7	0	7.7	0	0	0	7343600	0	7373800	0
Cleavage and polyadenylation specificity factor 73 kDa subunit, putative	EHI_136170	C4M297	C4M297	22.0374	19	22.0546	19	19	19	0.219106	0.359536	2.03066			1	1	0	1	0	0	0	1	2.4	2.4	2.4	86.77	0	2.3156	8660600	37	2	1	0	1	0	0	0	755	755	2.4	0	2.4	0	0	0	4304400	0	4356100	0
Flavin reductase like domain-containing protein	EHI_182820	C4LV62	C4LV62	21.9445	19	21.9628	19	19	19	0.219107	0.359536	1.96908			1	1	0	1	0	0	0	1	6.8	6.8	6.8	21.837	0.00073529	2.0566	8123400	10	2	1	0	1	0	0	0	190	190	6.8	0	6.8	0	0	0	4035900	0	4087500	0
Armadillo repeat-containing protein 8	EHI_078270	C4M542	C4M542	19	23.109	23.1461	19	19	19	0.219113	0.359536	2.75172			2	1	2	2	0	0	0	2	2.2	2.2	2.2	86.365	0.009822	1.0029	18330000	36	5	1	2	2	0	0	0	771	771	1.3	2.2	2.2	0	0	0	0	9047100	9282900	0
Tubulin beta chain	EHI_049920	C4LUJ0	C4LUJ0	25.8264	19	25.7602	19	19	19	0.219115	0.359536	4.52887			4	3	0	3	0	0	0	4	11.8	11.8	11.8	51.18	0	17.615	116330000	18	8	3	0	3	0	0	0	459	459	10.2	0	9.6	0	0	0	59502000	0	56831000	0
HECT domain and RCC1-like domain-containing protein, putative (Fragment); MIB/HERC2 domain-containing protein	EHI_030610	B1N591;C4M2U3	B1N591;C4M2U3	23.3288	19	23.376	19	19	19	0.219118	0.359536	2.9016			1	1	0	1	0	0	0	1	10.6	10.6	10.6	20.222	0	13.579	21423000	10	4	1	0	1	0	0	0	179	NaN	10.6	0	10.6	0	0	0	10536000	0	10886000	0
Pumilio family RNA-binding protein	EHI_148330	C4LT03	C4LT03	19	23.3037	23.3717	19	19	21.6758	0.219134	0.359536	2.8918			1	0	1	1	1	1	1	1	2.7	2.7	2.7	51.128	0	2.4954	24558000	28	5	0	1	1	1	1	1	439	439	0	2.7	2.7	2.7	2.7	2.7	0	10354000	10854000	0
Flavin reductase like domain-containing protein	EHI_198610	C4LWQ7	C4LWQ7	19	22.3	22.3553	19	19	19	0.219138	0.359536	2.21843			2	0	1	1	0	0	0	2	11.8	11.8	11.8	20.85	0	4.0787	10529000	13	2	0	1	1	0	0	0	186	186	0	4.8	7	0	0	0	0	5163700	5365600	0
Protein kinase domain containing protein	EHI_110250	C4LU78	C4LU78	25.3131	19	25.1842	19	19	19	0.219158	0.359536	4.16576			2	2	0	2	0	0	0	2	3.5	3.5	3.5	71.518	0	5.091	79811000	28	4	2	0	2	0	0	0	633	633	3.5	0	3.5	0	0	0	41686000	0	38125000	0
Conserved oligomeric Golgi complex subunit 3	EHI_147890	C4M906	C4M906	24.8507	19	24.9895	19	19	19	0.219175	0.359536	3.94674			5	4	0	4	0	0	0	5	12.2	12.2	12.2	67.076	0	24.174	63567000	33	9	4	0	4	0	0	0	573	573	9.8	0	10.6	0	0	0	30255000	0	33312000	0
Serine/threonine-protein phosphatase	EHI_176170	C4MB24	C4MB24	23.1204	19	23.0198	19	19	22.3941	0.219183	0.359536	2.71341			1	1	0	1	0	0	1	1	4	4	4	34.798	0.009768	0.98581	23135000	19	3	1	0	1	0	0	1	302	302	4	0	4	0	0	4	9118800	0	8504600	0
Ras-GEF domain-containing protein	EHI_138430	C4M3I5	C4M3I5	22.1977	19	22.2814	19	19	19	0.21919	0.359536	2.15969			1	1	0	1	1	0	0	1	1.8	1.8	1.8	73.671	0.0099882	0.8165	9907900	34	3	1	0	1	1	0	0	628	628	1.8	0	1.8	1.8	0	0	4810200	0	5097700	0
SH3 domain-containing protein	EHI_180030	C4M654	C4M654	21.9181	19	21.9997	19	19	19	0.219202	0.359536	1.97262			1	1	0	1	0	0	0	1	2.2	2.2	2.2	62.608	0.003876	1.2395	8156300	27	2	1	0	1	0	0	0	540	540	2.2	0	2.2	0	0	0	3962900	0	4193500	0
Acetyltransferase, putative	EHI_143110	C4MAJ4;C4M013	C4MAJ4;C4M013	22.1465	19	22.059	19	19	19	0.219207	0.359536	2.0685			1	1	0	1	0	0	0	1	6.4	6.4	6.4	22.09	0	2.4131	9012100	9	3	1	0	1	0	0	0	202	NaN	6.4	0	6.4	0	0	0	4642500	0	4369500	0
Transmembrane protein	EHI_075200	B1N4P2	B1N4P2	23.8114	19	23.961	19	19	19	0.219226	0.359536	3.25746			2	1	0	1	0	0	0	2	9.9	9.9	9.9	28.19	0	3.3956	31051000	8	1	1	0	1	0	0	0	253	253	5.1	0	4.7	0	0	0	14721000	0	16330000	0
Transmembrane protein	EHI_097860	C4M486	C4M486	24.2476	24.0854	19	19	19	19	0.219232	0.359536	3.44434			1	1	1	0	0	0	0	1	3.1	3.1	3.1	26.087	0.0099241	0.78749	37718000	7	4	1	1	0	0	0	0	224	224	3.1	3.1	0	0	0	0	19919000	17800000	0	0
Cysteine protease	EHI_141400	B1N2R5	B1N2R5	22.648	19	22.7715	19	19	19	0.219248	0.359536	2.47317			1	1	0	1	0	0	0	1	3.3	3.3	3.3	37.739	0.0074766	1.0798	13732000	17	2	1	0	1	0	0	0	330	330	3.3	0	3.3	0	0	0	6572500	0	7159800	0
Pyruvate kinase	EHI_098420	C4LXC4	C4LXC4	22.1213	22.0181	19	19	19	19	0.219251	0.359536	2.04648			2	1	1	0	0	0	0	2	6.5	6.5	6.5	36.408	0.0062972	1.1206	8809600	19	1	1	1	0	0	0	0	321	321	4.4	2.2	0	0	0	0	4562200	4247400	0	0
Nucleoplasmin-like domain-containing protein	EHI_112830	C4M9M2	C4M9M2	22.2162	19	22.3323	19	19	19	0.219268	0.359536	2.18283			1	1	0	1	0	0	0	1	12.4	12.4	12.4	23.172	0	8.6622	10153000	5	1	1	0	1	0	0	0	202	202	12.4	0	12.4	0	0	0	4872400	0	5280700	0
Endoplasmic reticulum-golgi intermediate compartment protein	EHI_153200	C4LSB2	C4LSB2	22.34	19	22.4631	19	19	19	0.219275	0.359536	2.26772			1	1	0	1	0	0	0	1	5.4	5.4	5.4	35.634	0	3.1095	11091000	12	1	1	0	1	0	0	0	315	315	5.4	0	5.4	0	0	0	5309100	0	5782000	0
Proteasome alpha subunit, putative	EHI_086080	C4M363	C4M363	23.0995	19	22.9463	19	19	19	0.219293	0.359536	2.68194			1	1	0	1	0	0	0	1	5.6	5.6	5.6	28.119	0.00073638	2.058	17070000	17	2	1	0	1	0	0	0	249	249	5.6	0	5.6	0	0	0	8987700	0	8082100	0
Ras family protein; Rho family GTPase	EHI_042680	B1N519;C4LXT2	B1N519;C4LXT2	22.517	19	22.6589	19	19	19	0.219308	0.359536	2.39196			1	1	0	1	0	0	0	1	8.7	8.7	8.7	18.124	0.00071023	1.8249	12624000	6	3	1	0	1	0	0	0	161	NaN	8.7	0	8.7	0	0	0	6002000	0	6622200	0
Leucine rich repeat protein	EHI_042890	C4M657	C4M657	22.4711	22.3322	19	19	19	22.4377	0.219322	0.359536	2.26774			3	1	1	0	0	0	1	3	6.8	6.8	6.8	74.706	0	5.9306	16775000	32	3	1	1	0	0	0	1	657	657	2	2	0	0	0	2.9	5813800	5280200	0	0
Protein kinase, putative	EHI_068600	B1N2K6	B1N2K6	24.4347	19	24.2149	19	19	19	0.219326	0.359536	3.54985			3	1	0	2	0	0	0	3	6.9	6.9	6.9	54.402	0.00076161	2.2551	42148000	26	3	1	0	2	0	0	0	467	467	2.8	0	4.1	0	0	0	22676000	0	19472000	0
Saposin B-type domain-containing protein	EHI_186800	C4LVP7	C4LVP7	25.1787	24.923	19	19	19	19	0.219337	0.359536	4.03391			1	1	1	0	0	0	0	1	0.8	0.8	0.8	108.98	0.010272	0.94158	69790000	38	3	1	1	0	0	0	0	926	926	0.8	0.8	0	0	0	0	37979000	31811000	0	0
60S ribosomal protein L35a, putative	EHI_014110	B1N4V3	B1N4V3	23.1911	19	23.0056	19	19	19	0.219372	0.359536	2.73224			2	1	0	2	0	0	0	2	9.3	9.3	9.3	12.122	0.0097205	0.96548	17998000	7	3	1	0	2	0	0	0	108	108	8.3	0	9.3	0	0	0	9576900	0	8421200	0
MIF4G domain-containing protein	EHI_143610	C4M807	C4M807	22.0272	19	22.1787	19	19	19	0.219416	0.359536	2.06863			1	1	0	1	0	0	0	1	2.6	2.6	2.6	77.315	0.00070671	1.8059	9021500	37	2	1	0	1	0	0	0	654	654	2.6	0	2.6	0	0	0	4274200	0	4747300	0
Synaptonemal complex protein	EHI_035820	C4LY09	C4LY09	19	22.6374	22.8517	19	19	19	0.219534	0.359536	2.49636			2	0	2	1	0	0	0	2	2.6	2.6	2.6	82.451	0.00070175	1.7268	14093000	39	3	0	2	1	0	0	0	700	700	0	2.6	1.4	0	0	0	0	6524200	7569200	0
Proteasome regulatory subunit, putative	EHI_005870	C4M2M2	C4M2M2	19	24.0292	24.329	19	19	22.2488	0.219544	0.359536	3.45274			2	0	1	2	0	0	1	2	6.3	6.3	6.3	33.042	0.0013324	1.3861	43179000	14	4	0	1	2	0	0	1	300	300	0	2.7	6.3	0	0	3.7	0	17120000	21075000	0
tRNA-guanine(15) transglycosylase-like domain-containing protein	EHI_079900	C4M2L1	C4M2L1	22.7718	19	23.0123	19	19	19	0.219605	0.359536	2.5947			1	1	0	1	0	0	0	1	3.7	3.7	3.7	44.168	0.0013841	1.6221	15622000	17	2	1	0	1	0	0	0	380	380	3.7	0	3.7	0	0	0	7161300	0	8460500	0
VWFA domain-containing protein	EHI_185260	C4M3Z4	C4M3Z4	22.9983	19	22.7573	19	19	19	0.219611	0.359536	2.58523			3	2	0	2	0	0	0	3	5.2	5.2	5.2	81.936	0	18.938	15469000	30	3	2	0	2	0	0	0	713	713	3.8	0	2.8	0	0	0	8379000	0	7089900	0
Rab family GTPase	EHI_164880	A0A8U0WP23	A0A8U0WP23	22.0372	21.8503	19	19	19	19	0.219633	0.359536	1.96253			1	1	1	0	0	0	0	1	8.9	8.9	8.9	21.064	0.010131	0.88331	8085000	14	3	1	1	0	0	0	0	190	190	8.9	8.9	0	0	0	0	4304000	3781000	0	0
THO complex subunitTHOC2 C-terminal domain-containing protein	EHI_185590	C4M8D0	C4M8D0	25.0123	19	24.6401	19	19	19	0.219639	0.359536	3.88415			4	3	0	3	0	0	0	4	4.8	4.8	4.8	117.41	0	11.514	59989000	53	8	3	0	3	0	0	0	993	993	3.7	0	3.7	0	0	0	33842000	0	26147000	0
DC2 protein	EHI_096150	C4LWC8	C4LWC8	23.5615	23.2464	19	19	19	19	0.219776	0.359536	2.93598			2	2	1	1	0	0	0	2	16	16	16	13.758	0.0062735	1.1079	22332000	4	4	2	1	1	0	0	0	125	125	16	8.8	8.8	0	0	0	12380000	9951200	0	0
Apyrase, putative	EHI_104590	C4LZ68	C4LZ68	25.2285	19	25.6915	19	19	19	0.219778	0.359536	4.30666			1	1	0	1	0	0	0	1	2.5	2.5	2.5	36.932	0.010029	0.83346	93502000	18	2	1	0	1	0	0	0	321	321	2.5	0	2.5	0	0	0	39312000	0	54190000	0
glutamate--tRNA ligase	EHI_155570	C4LWA8	C4LWA8	23.3406	23.6867	19	19	19	19	0.219876	0.359536	3.00907			4	2	1	0	0	0	1	4	7.4	7.4	7.4	62.877	0.0013605	1.5353	24124000	33	4	2	1	0	0	0	1	551	551	3.4	1.5	0	0	0	2.5	10622000	13502000	0	0
TLDc domain-containing protein	EHI_130740	C4LXF2	C4LXF2	23.5585	19	23.9274	19	19	19	0.219898	0.359536	3.16196			1	1	0	1	0	0	0	1	7	7	7	27.846	0	3.4857	28308000	11	2	1	0	1	0	0	0	244	244	7	0	7	0	0	0	12354000	0	15954000	0
LIM zinc finger domain containing protein	EHI_004170	C4LYP1	C4LYP1	22.88	19	23.2105	19	19	19	0.21998	0.359536	2.69684			3	1	0	2	0	0	0	3	21.6	21.6	21.6	19.014	0	3.9468	17426000	13	3	1	0	2	0	0	0	171	171	5.8	0	15.8	0	0	0	7719200	0	9706300	0
RuvB-like helicase	EHI_040360	C4M2G5	C4M2G5	22.0713	19	22.3396	19	19	20.9895	0.220024	0.359536	2.13696			2	1	0	1	0	0	1	2	5.9	5.9	5.9	47.86	0.0007485	2.1623	11796000	24	1	1	0	1	0	0	1	439	439	2.3	0	2.3	0	0	3.6	4406800	0	5307400	0
Villidin, putative	EHI_021270	C4M042	C4M042	22.5695	19	22.2818	19	19	19	0.22003	0.359536	2.28375			2	1	0	1	0	0	0	2	1.6	1.6	1.6	169.82	0.0038388	1.187	11323000	83	1	1	0	1	0	0	0	1469	1469	0.8	0	0.8	0	0	0	6224200	0	5099000	0
Zinc finger domain containing protein	EHI_154180	C4M586	C4M586	19	22.5849	22.2954	19	19	19	0.220035	0.359536	2.29344			2	0	1	1	0	0	0	2	2	2	2	117.49	0.0050794	1.1493	11439000	60	3	0	1	1	0	0	0	1013	1013	0	0.8	1.2	0	0	0	0	6291400	5147200	0
Rab family GTPase	EHI_187090	A0A8U0WPC1	A0A8U0WPC1	24.3054	19	23.8616	19	19	19	0.220105	0.359536	3.38902			1	1	0	1	0	0	0	1	12.6	12.6	12.6	21.129	0	3.5802	35976000	10	4	1	0	1	0	0	0	190	190	12.6	0	12.6	0	0	0	20733000	0	15243000	0
AIG1 family protein, putative	EHI_119040	C4M4X3	C4M4X3	22.6631	22.3548	19	19	19	19	0.220118	0.359536	2.3393			2	2	2	0	0	0	0	2	11	8.4	8.4	35.151	0	4.0685	12005000	21	4	2	2	0	0	0	0	308	308	11	8.4	0	0	0	0	6641600	5363700	0	0
Tyrosine kinase, putative	EHI_178610	C4LUS6	C4LUS6	21.8405	19	21.5924	19	19	19	0.220199	0.359536	1.81094			1	1	0	1	0	0	0	1	0.6	0.6	0.6	203.56	0.00072674	1.9703	6917200	82	2	1	0	1	0	0	0	1816	1816	0.6	0	0.6	0	0	0	3755200	0	3161900	0
protein-synthesizing GTPase	EHI_132880	C4MAU7	C4MAU7	25.5134	19	26.1378	19	19	19	0.220203	0.359536	4.55038			2	2	0	2	0	0	0	2	5.1	5.1	5.1	51.275	0.00071225	1.833	121730000	21	7	2	0	2	0	0	0	470	470	5.1	0	5.1	0	0	0	47895000	0	73833000	0
RhoGAP domain containing protein	EHI_013050	C4LX75	C4LX75	21.502	19	21.7521	19	19	19	0.220294	0.359536	1.75136			1	1	0	1	0	0	0	1	3.2	3.2	3.2	54.616	0.0026281	1.3283	6502000	25	3	1	0	1	0	0	0	474	474	3.2	0	3.2	0	0	0	2969900	0	3532100	0
Iron-sulfur flavoprotein, putative	EHI_025710	C4MAX9	C4MAX9	23.5331	19	24.0107	19	19	19	0.220419	0.359536	3.18128			2	2	1	2	0	0	0	2	13.5	13.5	13.5	21.439	0	6.3159	29041000	10	5	2	1	2	0	0	0	192	192	13.5	7.8	13.5	0	0	0	12139000	0	16902000	0
Dopey N-terminal domain-containing protein	EHI_023630	B1N439	B1N439	23.1167	22.7218	19	19	19	19	0.220437	0.359536	2.61282			1	1	1	0	0	0	0	1	0.7	0.7	0.7	156.92	0.0013889	1.6743	16013000	63	2	1	1	0	0	0	0	1336	1336	0.7	0.7	0	0	0	0	9095200	6917400	0	0
4Fe-4S ferredoxin-type domain-containing protein	EHI_194430	C4LZV6	C4LZV6	22.7759	19	23.1838	19	19	19	0.220484	0.359536	2.65322			2	1	0	2	0	0	0	2	11.6	11.6	11.6	21.192	0	13.406	16710000	12	3	1	0	2	0	0	0	189	189	7.4	0	11.6	0	0	0	7181500	0	9528400	0
Ras GTPase-activating protein, putative	EHI_182780	C4LV59	C4LV59	24.0412	19	24.5865	19	19	19	0.220487	0.359536	3.54257			3	3	2	3	0	0	0	3	7.9	7.9	7.9	65.173	0	23.243	42456000	38	11	3	2	3	0	0	0	571	571	7.9	5.6	7.9	0	0	0	17263000	0	25193000	0
PX domain-containing protein	EHI_131140	C4LXI2	C4LXI2	22.7766	22.4042	19	19	19	19	0.220516	0.359536	2.39359			1	1	1	0	0	0	0	1	1.5	1.5	1.5	100.07	0	2.2992	12736000	44	1	1	1	0	0	0	0	850	850	1.5	1.5	0	0	0	0	7185000	5550600	0	0
EF-hand calcium-binding domain containing protein	EHI_168390	C4M4P9	C4M4P9	23.0442	19	23.4889	19	19	19	0.22053	0.359536	2.84435			3	1	0	2	0	0	0	3	8.5	8.5	8.5	37.028	0	3.6387	20421000	18	3	1	0	2	0	0	0	317	317	2.5	0	6	0	0	0	8649600	0	11772000	0
PH domain-containing protein	EHI_127250	B1N2U3	B1N2U3	22.4823	19	22.1345	19	19	19	0.220555	0.359536	2.2056			1	1	0	1	0	0	0	1	2.2	2.2	2.2	65.187	0.0038986	1.2839	10464000	27	2	1	0	1	0	0	0	590	590	2.2	0	2.2	0	0	0	5859400	0	4604100	0
Tubulin gamma chain	G-TUB	P54401	P54401	22.2343	19	21.9061	19	19	19	0.220604	0.359536	2.04681			1	1	0	1	0	0	0	1	3.8	3.8	3.8	52.074	0	2.5638	8864000	23	2	1	0	1	0	0	0	452	452	3.8	0	3.8	0	0	0	4933900	0	3930100	0
60S ribosomal protein L12, putative	EHI_030710	C4M1E1	C4M1E1	30.705	30.6217	31.8855	30.3345	30.1714	29.6668	0.220715	0.359536	0.817822			6	5	5	6	3	3	3	6	34.1	34.1	34.1	17.763	0	35.145	10785000000	8	64	5	5	6	3	3	3	167	167	29.9	34.1	34.1	24	24	24	1750400000	1652199936	3967300096	1353900032
Importin alpha, putative	EHI_025350	C4M322	C4M322	24.5261	19	23.9442	19	19	19	0.220726	0.359536	3.49011			1	1	0	1	0	0	0	1	3.3	3.3	3.3	55.282	0	20.092	40301000	14	3	1	0	1	0	0	0	478	478	3.3	0	3.3	0	0	0	24160000	0	16141000	0
Small GTPase Rab 32, putative; Ras-related protein Rab	EHI_069500	C4LWN8;A0A8U0WP37	C4LWN8;A0A8U0WP37	24.0517	19	24.665	19	19	19	0.220824	0.359536	3.57223			2	1	0	1	0	0	0	2	9	9	9	28.718	0	6.072	43991000	12	2	1	0	1	0	0	0	256	NaN	4.7	0	4.3	0	0	0	17389000	0	26602000	0
Mic1 domain-containing protein	EHI_151470	C4LSI9	C4LSI9	21.7166	19	21.4196	19	19	19	0.22086	0.359536	1.71205			1	1	0	1	0	0	0	1	2.8	1.7	1.7	74.559	0.003871	1.2309	6251100	41	2	1	0	1	0	0	0	638	638	2.8	0	1.7	0	0	0	3446200	0	2805000	0
Aldehyde-alcohol dehydrogenase 2	ADH2	Q24803	Q24803	29.5673	27.2246	29.5456	27.3454	27.1082	26.1472	0.220962	0.359536	1.5524			22	19	13	15	8	8	6	1	33.6	33.6	3	95.589	0	323.31	2125500000	42	155	1	0	0	0	0	0	870	870	31.1	20.9	21.8	13.8	13.8	9.9	795510016	156830000	783640000	170520000
Calcium load-activated calcium channel	EHI_177610	C4LY15	C4LY15	23.5991	19	24.189	19	19	19	0.221011	0.359536	3.26272			3	2	1	1	0	0	0	3	15.3	15.3	15.3	20.269	0	7.8399	31832000	8	3	2	1	1	0	0	0	176	176	11.4	4	5.1	0	0	0	12707000	0	19126000	0
Dynamin-1-like protein, putative	EHI_013180	C4LX84;B1N5L6	C4LX84;B1N5L6	23.2275	19	22.7468	19	19	19	0.221012	0.359536	2.65808			3	1	0	2	0	0	0	3	4.4	4.4	4.4	76.835	0	4.0228	16859000	44	3	1	0	2	0	0	0	682	NaN	1	0	3.4	0	0	0	9821300	0	7038100	0
Dipeptidyl peptidase 3	EHI_110750	C4LUC2	C4LUC2	23.6483	19	24.2497	19	19	19	0.221042	0.359536	3.29936			4	2	0	2	0	0	0	4	6.4	6.4	6.4	73.983	0.00073421	2.0478	33096000	32	4	2	0	2	0	0	0	645	645	3.3	0	3.1	0	0	0	13148000	0	19948000	0
Vacuolar protein sorting-associated protein	EHI_012580	C4LTP4	C4LTP4	22.7472	19	22.3124	19	19	19	0.221095	0.359536	2.3532			2	1	0	1	0	0	0	2	0.9	0.9	0.9	329.57	0	2.3733	12249000	142	2	1	0	1	0	0	0	2909	2909	0.5	0	0.4	0	0	0	7040300	0	5208400	0
Importin alpha	EHI_181150	C4M603	C4M603	21.999	19	22.3929	19	19	19	0.221097	0.359536	2.13061			1	1	0	1	0	0	0	1	2.5	2.5	2.5	55.83	0.0013784	1.6109	9698400	18	2	1	0	1	0	0	0	477	477	2.5	0	2.5	0	0	0	4191300	0	5507100	0
Rab family GTPase	EHI_082550	A0A8U0WPX8	A0A8U0WPX8	24.3856	19	23.7508	19	19	19	0.221162	0.359536	3.37881			1	1	0	1	0	0	0	1	3.4	3.4	3.4	26.242	0.00070872	1.816	36034000	14	1	1	0	1	0	0	0	233	233	3.4	0	3.4	0	0	0	21918000	0	14116000	0
Protein kinase domain-containing protein	EHI_139470	C4M6X2	C4M6X2	22.843	19	22.3867	19	19	19	0.221194	0.359536	2.40991			1	1	0	1	0	0	0	1	2.5	2.5	2.5	71.193	0	8.976	13007000	20	4	1	0	1	0	0	0	632	632	2.5	0	2.5	0	0	0	7523500	0	5483800	0
NADPH-dependent FMN reductase-like domain-containing protein; Iron-sulfur flavoprotein, putative (Fragment)	EHI_022270	C4M9L6;B1N5S9;B1N2Q3;C4M9R4;C4LUJ7	C4M9L6;B1N5S9;B1N2Q3;C4M9R4;C4LUJ7	22.3488	19	21.9479	19	19	19	0.221231	0.359536	2.0989			2	1	0	2	0	0	0	2	14.3	14.3	14.3	17.307	0.0019815	1.3489	9387000	7	3	1	0	2	0	0	0	154	NaN	8.4	0	14.3	0	0	0	5341400	0	4045600	0
Soluble NSF attachment protein gamma isoform, putative	EHI_136210	C4M2A1	C4M2A1	19	21.738	22.1109	19	19	19	0.221236	0.359536	1.94962			2	0	1	1	0	0	0	2	5.6	5.6	5.6	40.824	1	-2	8027100	23	2	0	1	1	0	0	0	360	360	0	2.8	2.8	0	0	0	0	3497800	4529300	0
WD domain containing protein	EHI_067830	C4LTX9	C4LTX9	21.5755	19	21.2663	19	19	19	0.221245	0.359536	1.61391			1	1	0	1	0	0	0	1	1.6	1.6	1.6	92.832	0	3.9751	5647300	40	2	1	0	1	0	0	0	831	831	1.6	0	1.6	0	0	0	3125100	0	2522200	0
Uncharacterized protein	EHI_025720	B1N4Y5;B1N4F3	B1N4Y5;B1N4F3	21.8922	19	21.5444	19	19	19	0.221251	0.359536	1.81218			1	1	0	1	0	0	0	1	10.7	10.7	10.7	18.684	0	6.3916	6950700	11	2	1	0	1	0	0	0	159	NaN	10.7	0	10.7	0	0	0	3892200	0	3058500	0
CUE domain-containing protein	EHI_006830	C4M0F6	C4M0F6	24.4333	19	23.7564	19	19	19	0.221419	0.359536	3.39657			1	1	0	1	0	0	0	1	2.5	2.5	2.5	42.139	0.0013468	1.4541	36825000	20	2	1	0	1	0	0	0	362	362	2.5	0	2.5	0	0	0	22654000	0	14171000	0
Uncharacterized protein	EHI_065620	C4LZX8	C4LZX8	22.9718	19	22.4724	19	19	19	0.221465	0.359536	2.4814			1	1	0	1	0	0	0	1	2.2	2.2	2.2	70.789	0	8.3192	14046000	29	2	1	0	1	0	0	0	601	601	2.2	0	2.2	0	0	0	8226200	0	5819300	0
RhoGAP domain containing protein	EHI_017650	C4M3H0	C4M3H0	22.0586	19	22.4993	19	19	19	0.221474	0.359536	2.18596			1	1	0	1	0	0	0	1	3.9	3.9	3.9	48.121	0	2.373	10297000	22	2	1	0	1	0	0	0	413	413	3.9	0	3.9	0	0	0	4368100	0	5928800	0
Protein kinase, putative	EHI_124860	C4M980	C4M980	22.2041	21.7839	19	19	19	19	0.221686	0.359536	1.99601			1	1	1	0	0	0	0	1	1.6	0.8	0.8	123.31	0.0098608	0.75883	8442500	55	2	1	1	0	0	0	0	1087	1087	1.6	0.8	0.7	0	0	0	4831700	3610900	0	0
Alpha-1,2-mannosidase, putative	EHI_009520	C4LZ28	C4LZ28	24.0635	19	23.3956	19	19	19	0.221719	0.359536	3.15302			1	1	0	1	0	0	0	1	2	2	2	85.256	0	7.863	28567000	40	3	1	0	1	0	0	0	737	737	2	0	2	0	0	0	17532000	0	11035000	0
Protein kinase, putative; non-specific serine/threonine protein kinase	EHI_068350	C4LU28;C4MAN9	C4LU28;C4MAN9	23.7848	19	23.1533	19	19	19	0.221722	0.359536	2.97935			1	1	0	1	0	0	0	1	1	1	1	89.478	0.010035	0.83386	23781000	36	2	1	0	1	0	0	0	765	NaN	1	0	1	0	0	0	14452000	0	9329000	0
Rab family GTPase	EHI_131170	A0A8U0WPA6	A0A8U0WPA6	22.8104	19	23.3957	19	19	19	0.221772	0.359536	2.73537			2	1	0	2	0	0	0	2	12.3	12.3	12.3	22.755	0	3.5099	18392000	14	3	1	0	2	0	0	0	203	203	7.4	0	12.3	0	0	0	7355500	0	11036000	0
Diaphanous protein, putative	EHI_125300	C4M622	C4M622	19	22.7238	23.3023	19	19	19	0.221828	0.359536	2.67537			1	0	1	1	0	0	0	1	1.1	1.1	1.1	131.98	0	10.984	17271000	56	3	0	1	1	0	0	0	1183	1183	0	1.1	1.1	0	0	0	0	6927100	10344000	0
Sister chromatid cohesion protein	EHI_201290	C4M6Q8	C4M6Q8	21.6775	22.109	19	19	19	19	0.222019	0.359536	1.92886			2	1	1	0	0	0	0	2	1.9	1.9	1.9	130.73	0	4.0562	7877800	54	2	1	1	0	0	0	0	1157	1157	1.2	0.7	0	0	0	0	3354200	4523600	0	0
Smr domain-containing protein	EHI_158100	C4M2C9	C4M2C9	22.1502	19	21.6837	19	19	19	0.222453	0.359536	1.94463			2	2	0	1	0	0	0	2	10	10	10	29.834	0.00074516	2.1477	8022900	12	2	2	0	1	0	0	0	261	261	10	0	5	0	0	0	4654400	0	3368600	0
Enhancer binding protein 2 (EBP2), putative	EHI_056380	C4M6Y8	C4M6Y8	19	23.8638	24.7249	19	19	19	0.222568	0.359536	3.52957			1	1	1	1	0	0	0	1	5	5	5	25.776	0	3.9281	42994000	13	1	1	1	1	0	0	0	219	219	5	5	5	0	0	0	0	15266000	27729000	0
SAM domain-containing protein	EHI_141070	C4M513	C4M513	23.0553	19	22.4415	19	19	19	0.222615	0.359536	2.49892			1	1	0	1	0	0	0	1	2.4	2.4	2.4	56.843	0.0063131	1.1224	14412000	19	1	1	0	1	0	0	0	505	505	2.4	0	2.4	0	0	0	8716400	0	5695800	0
EF-hand calcium-binding domain containing protein	EHI_060740	C4MBE2;C4M3G1;C4LU44	C4MBE2;C4M3G1;C4LU44	24.6135	19	25.6211	19	19	19	0.222656	0.359536	4.0782			2	1	0	1	0	0	0	2	7.9	7.9	7.9	26.569	0	2.7751	77276000	12	2	1	0	1	0	0	0	227	NaN	4.4	0	3.5	0	0	0	25669000	0	51607000	0
Ras family GTPase	EHI_198330	C4MA96	C4MA96	23.1634	19	23.9287	19	19	19	0.222813	0.359536	3.03069			3	2	1	3	0	0	0	3	22.2	22.2	22.2	22.84	0	19.576	25363000	14	7	2	1	3	0	0	0	207	207	15.9	7.7	22.2	0	0	0	9394600	0	15968000	0
Vacuolar protein sorting 35, putative	EHI_086580	C4M8Z4	C4M8Z4	21.7094	19	21.2861	19	19	19	0.222863	0.359536	1.66514			1	1	1	1	0	0	0	1	2.1	2.1	2.1	77.514	0.001368	1.5785	5986100	31	3	1	1	1	0	0	0	706	706	2.1	2.1	2.1	0	0	0	3429000	0	2557100	0
Small GTP binding protein Rab7, putative	EHI_189100	A0A8U0WPG7	A0A8U0WPG7	23.6459	19	22.8805	19	19	19	0.22332	0.359536	2.84213			2	2	0	1	0	0	0	2	9.3	9.3	9.3	23.144	0.0007593	2.2311	20848000	16	3	2	0	1	0	0	0	204	204	9.3	0	4.9	0	0	0	13126000	0	7721600	0
Rab family GTPase	EHI_182030	A0A8U0WQ01	A0A8U0WQ01	19	21.9001	22.4732	19	19	19	0.223334	0.359536	2.12442			1	0	1	1	0	0	0	1	7.3	7.3	7.3	21.789	0.0038363	1.1823	9736100	15	1	0	1	1	0	0	0	193	193	0	7.3	7.3	0	0	0	0	3913600	5822500	0
Uncharacterized protein	EHI_173480	C4M6I7	C4M6I7	24.089	19	25.098	19	19	19	0.223359	0.359536	3.72902			3	2	0	2	0	0	0	3	12.5	12.5	12.5	27.623	0	4.0562	53759000	12	5	2	0	2	0	0	0	240	240	9.2	0	9.2	0	0	0	17845000	0	35914000	0
D-aminoacyl-tRNA deacylase	EHI_118150	C4LYZ9	C4LYZ9	19	23.9997	23.1679	19	19	22.0024	0.22341	0.359536	3.05587			2	0	2	1	2	0	1	2	8.7	8.7	8.7	22.103	0.0007326	2.0226	30399000	13	14	0	2	1	2	0	1	195	195	0	8.7	4.6	8.7	0	4.6	0	16774000	9423900	0
Protein kinase domain containing protein	EHI_164380	C4M1S0	C4M1S0	23.6383	19	22.846	19	19	19	0.223663	0.359536	2.82812			1	1	0	1	0	0	0	1	1.7	1.1	1.1	128.74	0	7.4259	20597000	48	2	1	0	1	0	0	0	1136	1136	1.7	0.6	1.7	0	0	0	13057000	0	7539500	0
Uncharacterized protein	EHI_044790	C4LT98	C4LT98	22.9911	19	22.3057	19	19	19	0.223716	0.359536	2.43228			2	1	0	1	0	0	0	2	5.5	5.5	5.5	34.207	0.0032573	1.2951	13521000	17	2	1	0	1	0	0	0	293	293	2.7	0	2.7	0	0	0	8337100	0	5184300	0
VWFA domain-containing protein	EHI_096790	C4LWI9	C4LWI9	27.8813	24.4586	24.9672	19	24.7534	23.7466	0.224059	0.359536	3.89236			5	5	1	2	0	1	1	4	20.5	20.5	16.3	29.092	0	35.702	345450000	15	19	4	1	2	0	1	1	263	263	20.5	5.3	5.7	0	5.3	5.3	247230000	23056000	32801000	0
proline--tRNA ligase	EHI_040400	C4M2G9	C4M2G9	22.3867	19	23.1251	19	19	19	0.224151	0.359536	2.50392			3	1	0	2	0	0	0	3	5.6	5.6	5.6	61.131	0	2.8929	14632000	33	4	1	0	2	0	0	0	536	536	1.7	0	3.9	0	0	0	5483600	0	9148200	0
Rhomboid-like protein	EHI_197460	C4LVG2	C4LVG2	24.8611	19	23.799	19	19	19	0.224289	0.359536	3.55335			1	1	0	1	0	0	0	1	7.6	7.6	7.6	33.931	0	23.505	45069000	9	5	1	0	1	0	0	0	304	304	7.6	0	7.6	0	0	0	30474000	0	14595000	0
Major facilitator superfamily protein	EHI_094800	B1N4W6	B1N4W6	25.1691	19	24.0493	19	19	19	0.224307	0.359536	3.73947			1	1	0	1	0	0	0	1	2	2	2	62.59	0	5.5088	55087000	15	2	1	0	1	0	0	0	560	560	2	0	2	0	0	0	37726000	0	17361000	0
Beige/BEACH domain containing protein	EHI_051850	C4LY79	C4LY79	22.1932	19	22.9048	19	19	19	0.224353	0.359536	2.36601			2	2	0	1	1	0	0	2	0.7	0.7	0.7	421.48	0	4.427	12648000	186	4	2	0	1	1	0	0	3652	3652	0.7	0	0.4	0.4	0	0	4795400	0	7853000	0
Transmembrane protein	EHI_129370	B1N4L5	B1N4L5	23.8492	22.965	19	19	19	19	0.224358	0.359536	2.93808			1	1	1	0	0	0	0	1	11.2	11.2	11.2	13.89	0.00075075	2.1785	23299000	2	2	1	1	0	0	0	0	125	125	11.2	11.2	0	0	0	0	15112000	8187800	0	0
Acyl-CoA synthetase, putative	EHI_010560	C4LYU3	C4LYU3	23.5831	19	22.7368	19	19	19	0.224506	0.359536	2.77332			4	2	0	2	0	0	0	4	4.1	4.1	4.1	111.79	0	2.4844	19557000	46	3	2	0	2	0	0	0	1000	1000	1.7	0	2.4	0	0	0	12567000	0	6989800	0
Cullin family profile domain-containing protein	EHI_078420	B1N5E9	B1N5E9	19	22.3202	23.0845	19	19	19	0.224664	0.359536	2.46823			1	0	1	1	0	0	0	1	1.9	1.9	1.9	61.081	0.00071378	1.8529	14131000	31	2	0	1	1	0	0	0	521	521	0	1.9	1.9	0	0	0	0	5236700	8894400	0
Ubiquitin-like domain-containing protein	EHI_135110	C4M0Z7	C4M0Z7	23.0253	19	22.271	19	19	19	0.224683	0.359536	2.43208			1	1	0	1	0	0	0	1	4.9	4.9	4.9	32.753	0	4.0102	13598000	10	3	1	0	1	0	0	0	287	287	4.9	0	4.9	0	0	0	8536900	0	5060900	0
Rap GTPase-activating protein	EHI_087740	C4LXV4	C4LXV4	22.6888	19	21.9887	19	19	19	0.22484	0.359536	2.22585			1	1	0	1	0	0	0	1	1.6	1.6	1.6	76.259	0.0057034	1.146	10923000	35	2	1	0	1	0	0	0	670	670	1.6	0	1.6	0	0	0	6761200	0	4161600	0
Ubiquitin carboxyl-terminal hydrolase, putative	EHI_200820	C4M3Y7	C4M3Y7	23.2548	19	24.263	19	19	19	0.224958	0.359536	3.17259			3	1	0	3	0	0	0	3	2.2	2.2	2.2	253.91	0	11.41	30141000	118	6	1	0	3	0	0	0	2181	2181	1.1	0	2.2	0	0	0	10009000	0	20132000	0
Uncharacterized protein	EHI_092360	C4LUZ9	C4LUZ9	24.5153	19	25.8617	19	19	19	0.225274	0.359536	4.12567			5	3	0	4	0	0	0	5	2.2	2.2	2.2	327.86	0	8.0067	84954000	143	7	3	0	4	0	0	0	2772	2772	1.2	0	2	0	0	0	23980000	0	60974000	0
EF-hand calcium-binding domain containing protein	EHI_148810	B1N2G5	B1N2G5	19	22.2668	23.0748	19	19	21.4217	0.225418	0.359536	2.44721			2	0	1	1	1	0	1	2	8.8	8.8	8.8	35.082	0	3.4538	16690000	18	4	0	1	1	1	0	1	307	307	0	3.3	3.3	5.5	0	5.5	0	5046400	8835000	0
Ras GTPase-activating protein, putative	EHI_010720	C4LYV9	C4LYV9	24.5486	23.442	19	19	19	19	0.225498	0.359536	3.33022			2	1	2	0	0	0	0	2	4.1	4.1	4.1	50.706	0	2.4913	35936000	30	3	1	2	0	0	0	0	439	439	2.3	4.1	0	0	0	0	24540000	11396000	0	0
ABC3 transporter permease protein domain-containing protein	EHI_182810	C4LV61	C4LV61	23.3331	19	22.4587	19	19	22.7184	0.225665	0.359536	2.59726			2	1	0	1	0	0	1	2	2.9	2.9	2.9	113.85	0	4.8177	23233000	37	2	1	0	1	0	0	1	1008	1008	1.6	0	1.6	0	0	1.3	10567000	0	5764300	0
ABC3 transporter permease protein domain-containing protein	EHI_148680	C4LT38	C4LT38	23.4325	19	22.5302	19	19	19	0.225793	0.359536	2.65424			2	2	0	1	0	0	0	2	2.7	2.7	2.7	126.76	0	7.3576	17378000	43	3	2	0	1	0	0	0	1129	1129	2.7	0	1.2	0	0	0	11321000	0	6057200	0
Uncharacterized protein	EHI_025880	C4M941	C4M941	23.5775	22.6453	19	19	19	19	0.2258	0.359536	2.74092			2	1	1	1	0	0	0	2	2.7	2.7	2.7	107.09	0.0074673	1.0772	19078000	44	3	1	1	1	0	0	0	916	916	1.1	1.1	1.6	0	0	0	12518000	6560000	0	0
Tyrosine kinase, putative	EHI_050820	C4LTV2	C4LTV2	22.5357	19	21.8057	19	19	19	0.226006	0.359536	2.11378			1	1	0	1	0	0	0	1	0.7	0.7	0.7	201.02	0	2.4131	9745900	94	1	1	0	1	0	0	0	1753	1753	0.7	0	0.7	0	0	0	6080200	0	3665700	0
Pro protein convertase subtilisin/kexinType 5, putative; Tyrosine kinase, putative	EHI_087880	C4LXW7;C4M410	C4LXW7;C4M410	23.7031	19	22.7251	19	19	19	0.226115	0.359536	2.80942			3	2	1	3	0	0	0	3	4.3	4.3	4.3	114.01	0	4.3837	20591000	57	4	2	1	3	0	0	0	1032	NaN	3.1	1.2	4.3	0	0	0	13657000	0	6933300	0
Uncharacterized protein	EHI_138000	B1N349	B1N349	23.0259	19	22.1783	19	19	19	0.226308	0.359536	2.40141			2	2	0	2	0	0	0	2	4.3	4.3	4.3	59.078	0	2.6265	13287000	24	3	2	0	2	0	0	0	507	507	4.3	0	4.3	0	0	0	8540600	0	4746100	0
RNA cytidine acetyltransferase	EHI_033750	C4M438	C4M438	22.2205	23.0958	19	19	19	19	0.226551	0.359536	2.43874			2	1	2	0	0	0	0	2	2.2	2.2	2.2	111.09	0	2.4097	13851000	49	3	1	2	0	0	0	0	978	978	1.2	2.2	0	0	0	0	4886800	8964300	0	0
Uncharacterized protein	EHI_057820	C4M702	C4M702	19	21.3669	22.0116	19	19	19	0.226579	0.359536	1.79286			1	0	1	1	0	0	0	1	2.6	2.6	2.6	49.259	0.0038585	1.2194	6932800	19	2	0	1	1	0	0	0	423	423	0	2.6	2.6	0	0	0	0	2704500	4228300	0
START domain containing protein	EHI_109680	C4M3J8	C4M3J8	24.9601	25.0851	26.5411	25.0209	23.0578	23.1047	0.226631	0.359536	1.48942			2	2	1	2	2	1	1	2	8	8	8	25.862	0	8.4514	217680000	12	18	2	1	2	2	1	1	225	225	8	4.4	8	8	4.4	4.4	32640000	35593000	97649000	34045000
RanBD1 domain-containing protein	EHI_085060	C4M1L6	C4M1L6	19	22.628	23.6419	19	19	19	0.226919	0.359536	2.75661			1	0	1	1	0	0	0	1	1.8	1.8	1.8	76.516	0.00072046	1.9178	19571000	34	2	0	1	1	0	0	0	685	685	0	1.8	1.8	0	0	0	0	6481900	13089000	0
Presenilin	EHI_188280	C4M1A2	C4M1A2	25.7014	19	24.2332	19	19	19	0.226972	0.359536	3.97818			1	1	0	1	0	0	0	1	2.3	2.3	2.3	44.453	0	2.78	74282000	10	3	1	0	1	0	0	0	396	396	2.3	0	2.3	0	0	0	54562000	0	19720000	0
Uncharacterized protein	EHI_175420	C4M3A9	C4M3A9	22.3461	19	21.609	19	19	19	0.227068	0.359536	1.98502			3	2	0	1	0	0	0	3	3.8	3.8	3.8	99.595	0	3.5002	8529900	43	3	2	0	1	0	0	0	867	867	2.7	0	1.2	0	0	0	5331400	0	3198500	0
26s protease regulatory subunit; 26S protease regulatory subunit 7, putative	EHI_052050	C4M846;B1N4Q6	C4M846;B1N4Q6	24.3543	19	25.8796	19	19	19	0.227183	0.359536	4.07796			3	1	0	3	0	0	0	3	9.6	6.7	6.7	46.914	0	2.9244	83183000	20	5	1	0	3	0	0	0	417	NaN	5	0	9.6	2.9	0	0	21447000	0	61736000	0
Deoxycytidine triphosphate deaminase, putative	EHI_140240	C4M472	C4M472	21.738	19	22.5193	19	19	19	0.227206	0.359536	2.08576			1	1	0	1	0	0	0	1	5.8	5.8	5.8	19.445	0	3.3247	9509200	11	1	1	0	1	0	0	0	171	171	5.8	0	5.8	0	0	0	3497700	0	6011500	0
Guanine nucleotide regulatory protein, putative	EHI_004230	C4LYP7	C4LYP7	23.5609	22.5465	19	19	19	19	0.22724	0.359536	2.70246			1	1	1	0	0	0	0	1	2.3	2.3	2.3	53.935	0	2.7648	18501000	25	2	1	1	0	0	0	0	488	488	2.3	2.3	0	0	0	0	12375000	6125800	0	0
Small GTPase	EHI_094000	C4LYJ1	C4LYJ1	22.0642	19	22.9455	19	19	19	0.227316	0.359536	2.33658			1	1	0	1	0	0	0	1	8.2	8.2	8.2	22.084	0	14.14	12463000	10	4	1	0	1	0	0	0	194	194	8.2	0	8.2	0	0	0	4385300	0	8077600	0
Uncharacterized protein	EHI_021320	C4M047	C4M047	23.5042	19	22.4924	19	19	19	0.227421	0.359536	2.66554			1	1	0	1	0	0	0	1	6.8	6.8	6.8	25.716	0.0068836	1.1029	17798000	11	2	1	0	1	0	0	0	222	222	6.8	0	6.8	0	0	0	11898000	0	5900500	0
Oxysterol binding protein, putative	EHI_050360	C4LTR1	C4LTR1	24.0683	19	22.8955	19	19	19	0.227987	0.359536	2.98791			1	1	0	1	0	0	0	1	1.9	1.9	1.9	82.702	0	15.127	25392000	44	2	1	0	1	0	0	0	719	719	1.9	0	1.9	0	0	0	17590000	0	7802400	0
phosphatidylinositol 3-kinase	EHI_096560	C4LWG8	C4LWG8	23.4183	22.3608	19	19	19	19	0.228683	0.359536	2.59301			3	2	1	0	0	0	0	3	3.2	3.2	3.2	96.992	0.001387	1.6409	16596000	39	2	2	1	0	0	0	0	849	849	2	1.2	0	0	0	0	11210000	5385900	0	0
Uncharacterized protein	EHI_188820	C4M2U9	C4M2U9	21.8615	19	21.1716	19	19	19	0.22884	0.359536	1.67768			1	1	0	1	0	0	0	1	3.3	3.3	3.3	58.686	0	2.5096	6172300	26	2	1	0	1	0	0	0	540	540	3.3	0	3.3	0	0	0	3810300	0	2362000	0
t-SNARE coiled-coil homology domain-containing protein	EHI_012060	C4LTJ9	C4LTJ9	23.3438	22.2888	19	19	19	19	0.229001	0.359536	2.54421			1	1	1	0	0	0	0	1	22.3	22.3	22.3	11.207	0	3.9439	15770000	7	2	1	1	0	0	0	0	103	103	22.3	22.3	0	0	0	0	10646000	5123900	0	0
Cell differentiation protein rcd1	EHI_093570	C4LYF8	C4LYF8	22.6931	21.7923	19	19	19	19	0.229095	0.359536	2.1618			4	3	1	1	0	0	0	4	13.3	13.3	13.3	38.049	0.00074129	2.0942	10413000	16	3	3	1	1	0	0	0	338	338	8.3	5	3.6	0	0	0	6781000	3632000	0	0
Major facilitator superfamily transporter, putative	EHI_068400	C4LU32	C4LU32	23.393	19	22.3196	19	19	19	0.229134	0.359536	2.57087			1	1	0	1	0	0	0	1	4.7	2.6	2.6	59.932	1	-2	16249000	13	2	1	0	1	0	0	0	531	531	4.7	0	2.6	0	0	0	11015000	0	5234600	0
WD domain containing protein	EHI_000520	C4LZA3	C4LZA3	19	22.8421	24.0856	19	19	19	0.229151	0.359536	2.97592			1	0	1	1	0	0	0	1	3.2	3.2	3.2	46.621	0.0098952	0.77084	25322000	23	2	0	1	1	0	0	0	409	409	0	3.2	3.2	0	0	0	0	7519200	17803000	0
Vacuolar ATP synthase subunit B, putative; Vacuolar proton pump subunit B	EHI_118220	B1N337;A0A8U0WP39	B1N337;A0A8U0WP39	23.5335	19	22.4228	19	19	19	0.229196	0.359536	2.65211			1	1	0	1	0	0	0	1	8.9	8.9	8.9	14.523	0	13.408	17765000	9	2	1	0	1	0	0	0	168	NaN	8.9	0	8.9	0	0	0	12142000	0	5622700	0
Ran GTPase-activating protein, putative	EHI_185290	C4M3Z7	C4M3Z7	23.9598	22.7441	19	19	19	19	0.229207	0.359536	2.90128			1	1	1	0	0	0	0	1	4.7	4.7	4.7	19.612	0.00447	1.1803	23341000	9	2	1	1	0	0	0	0	169	169	4.7	4.7	0	0	0	0	16316000	7025000	0	0
Uncharacterized protein	EHI_198590	C4LWQ5	C4LWQ5	23.8131	22.6307	19	19	19	19	0.229258	0.359536	2.81462			1	1	1	0	0	0	0	1	2.2	2.2	2.2	52.87	0	2.8621	21233000	23	2	1	1	0	0	0	0	461	461	2.2	2.2	0	0	0	0	14739000	6494200	0	0
Caldesmon, putative; MIF4G domain-containing protein	EHI_019640	B1N4N4;C4M8H1	B1N4N4;C4M8H1	21.0148	19	21.6891	19	19	19	0.229735	0.359536	1.56797			1	1	0	1	0	0	0	1	3.1	3.1	3.1	71.608	0	36.205	5500000	21	3	1	0	1	0	0	0	608	NaN	3.1	0	3.1	0	0	0	2118800	0	3381200	0
ATP-dependent RNA helicase	EHI_082600	C4M6A9	C4M6A9	22.1978	19	21.3951	19	19	19	0.22976	0.359536	1.86428			1	1	1	1	0	0	0	1	3.9	3.9	3.9	49.319	0	7.2727	7568300	24	4	1	1	1	0	0	0	440	440	3.9	3.9	3.9	0	0	0	4810500	0	2757800	0
Ras-like protein 3, putative	EHI_049030	B1N4V4	B1N4V4	25.9162	19	24.1369	19	19	19	0.230367	0.359536	4.01771			2	2	0	2	0	0	0	2	49.4	9.4	9.4	18.984	0	10.192	81772000	10	7	2	0	2	0	0	0	170	170	49.4	39.4	33.5	39.4	33.5	39.4	63324000	0	18447000	0
Regulator of nonsense transcripts, putative	EHI_035550	C4LXY5	C4LXY5	23.2353	22.1449	19	19	19	19	0.230386	0.359536	2.46007			1	1	1	0	0	0	0	1	1.8	1.8	1.8	107.67	0.010186	0.90135	14512000	49	2	1	1	0	0	0	0	937	937	1.8	1.8	0	0	0	0	9874900	4637400	0	0
Replication factor C familiy protein	EHI_099850	C4M6G5	C4M6G5	21.613	19	22.5194	19	19	19	0.230392	0.359536	2.04413			2	1	0	1	0	0	0	2	6.2	6.2	6.2	35.991	0.0099707	0.80935	9219400	19	1	1	0	1	0	0	0	325	325	3.4	0	2.8	0	0	0	3207500	0	6011800	0
Peptidase, putative	EHI_175020	C4LZM7	C4LZM7	27.6337	26.1008	28.162	26.3817	25.7049	25.23	0.230538	0.359536	1.25554			14	12	6	11	5	5	5	14	38.4	38.4	38.4	41.61	0	90.006	762020000	24	61	12	6	11	5	5	5	372	372	32.8	17.7	33.1	12.6	12.6	12.6	208250000	71963000	300329984	87432000
Cullin, putative	EHI_061010	C4M9N4	C4M9N4	22.6848	22.0043	22.7477	19	22.2303	19	0.23056	0.359536	1.86379			3	1	1	2	0	1	0	3	4.7	4.7	4.7	79.186	0.0013414	1.4235	22912000	42	5	1	1	2	0	1	0	675	675	1.6	1.6	3.3	0	1.5	0	6742100	4206700	7042900	0
Serine/threonine-protein phosphatase	EHI_031240	C4M4K6	C4M4K6	22.9589	21.9258	19	19	19	19	0.230732	0.359536	2.2949			1	1	1	0	0	0	0	1	3.9	3.9	3.9	35.411	0	5.3044	12137000	13	2	1	1	0	0	0	0	309	309	3.9	3.9	0	0	0	0	8152900	3984100	0	0
Membrane-bound O-acyltransferase (MBOAT ) family protein	EHI_152790	C4LSW2	C4LSW2	24.0978	19	22.7615	19	19	19	0.230852	0.359536	2.95309			2	2	0	1	0	0	0	2	4.2	4.2	4.2	56.126	0.010309	0.9575	25064000	22	3	2	0	1	0	0	0	473	473	4.2	0	1.9	0	0	0	17954000	0	7110300	0
Histidine acid phosphatase family protein	EHI_152850	C4LSW8	C4LSW8	24.3069	22.9099	19	19	19	19	0.230964	0.359536	3.07225			2	2	1	0	0	0	0	2	5.9	5.9	5.9	40.539	0	2.5421	28635000	15	4	2	1	0	0	0	0	353	353	5.9	3.1	0	0	0	0	20754000	7880600	0	0
Ras-GAP domain-containing protein	EHI_167030	C4LYA5	C4LYA5	21.6915	23.3061	22.5997	22.1312	19	19	0.231243	0.359536	1.96684			3	1	2	2	1	0	0	3	8.2	8.2	8.2	54.633	0	13.462	24707000	25	5	1	2	2	1	0	0	465	465	2.4	5.8	5.8	2.2	0	0	3386900	10371000	6355900	4593500
NadR/Ttd14 AAA domain-containing protein	EHI_183430	C4M740	C4M740	19	21.7305	22.7281	19	19	19	0.231411	0.359536	2.15286			1	0	1	1	0	0	0	1	28.9	7.1	7.1	27.197	0	4.8125	10427000	13	3	0	1	1	0	0	0	239	239	4.6	16.3	28.9	15.1	9.2	9.2	0	3479600	6947600	0
26s proteasome subunit P45 family protein, putative	EHI_177320	C4LY36	C4LY36	19	22.2254	23.4127	19	19	19	0.231565	0.359536	2.54606			1	0	1	1	0	0	0	1	3.6	3.6	3.6	43.782	0.0013736	1.6024	16071000	23	2	0	1	1	0	0	0	389	389	0	3.6	3.6	0	0	0	0	4903700	11167000	0
Serine/threonine-protein phosphatase	EHI_048590	C4M2X2	C4M2X2	22.2132	19	21.3482	19	19	19	0.231579	0.359536	1.85383			2	1	0	1	0	1	0	2	3.2	3.2	3.2	68.043	0.0013342	1.4019	7532100	28	2	1	0	1	0	1	0	592	592	1.7	0	1.5	0	1.7	0	4862400	0	2669700	0
tRNA (Cytosine-5-)-methyltransferase, putative	EHI_103830	C4LVM5	C4LVM5	19	21.4	22.2851	19	19	19	0.231604	0.359536	1.89505			1	0	1	1	0	0	0	1	1.9	1.9	1.9	72.225	0.010018	0.8287	7878100	37	2	0	1	1	0	0	0	630	630	0	1.9	1.9	0	0	0	0	2767200	5110900	0
Uncharacterized protein	EHI_067090	C4MA45	C4MA45	27.5068	25.127	19	19	19	19	0.232714	0.359536	4.87795			6	6	4	0	0	0	0	6	26.4	26.4	26.4	24.082	0	26.745	227350000	9	14	6	4	0	0	0	0	212	212	26.4	22.2	0	0	0	0	190710000	36643000	0	0
Vacuolar protein sorting-associated protein 51 homolog	EHI_199950	C4M7M3;B1N351	C4M7M3;B1N351	19	21.8519	22.9634	19	19	19	0.232791	0.359536	2.27174			1	0	1	1	0	0	0	1	2.6	2.6	2.6	73.648	0.002635	1.3384	11963000	40	0	0	1	1	0	0	0	657	NaN	0	2.6	2.6	0	0	0	0	3785000	8178200	0
Acyl-coA synthetase, putative	EHI_131880	C4M5D7	C4M5D7	23.7302	22.6515	24.8907	23.1259	20.8168	19	0.233019	0.359536	1.78619			7	2	2	5	1	1	1	6	8.7	8.7	7.7	114.57	0	15.863	62611000	50	11	2	1	5	1	1	1	1014	1014	2.5	2	7.7	1.2	1.2	1.2	13916000	6588600	31107000	9153400
N(6)-L-threonylcarbamoyladenine synthase	EHI_024630	C4M0K5	C4M0K5	19	21.2115	22.0845	19	19	21.881	0.233078	0.359536	1.76533			1	0	1	1	0	0	1	1	3.9	3.9	3.9	36.84	0.010107	0.88116	10738000	17	2	0	1	1	0	0	1	335	335	0	3.9	3.9	0	0	3.9	0	2428300	4447200	0
Hsc70-interacting protein, putative	EHI_158050	C4M2C4	C4M2C4	19	23.3266	22.1013	19	19	19	0.2331	0.359536	2.47597			2	0	2	1	1	0	0	2	7	7	7	40.13	0	9.5654	15019000	17	5	0	2	1	1	0	0	359	359	0	7	4.2	4.2	0	0	0	10520000	4499300	0
Phorbol-ester/DAG-type domain-containing protein	EHI_038280	C4M8Z9	C4M8Z9	19	19	22.1164	22.2087	21.8806	21.5621	0.233109	0.359536	-2.00586			2	0	0	1	1	2	1	2	2.4	2.4	2.4	110.4	0	2.6146	16351000	54	5	0	0	1	1	2	1	963	963	0	0	1.3	1.3	2.4	1.3	0	0	4546600	4847200
adenylyl-sulfate kinase	EHI_179080	C4LUW9	C4LUW9	23.7722	19	25.674	19	19	19	0.233297	0.359536	3.81542			4	1	1	3	0	0	0	4	12.4	12.4	12.4	52.732	0	16.543	67865000	25	6	1	1	3	0	0	0	477	477	2.1	2.9	9.4	0	0	0	14327000	0	53537000	0
60S ribosomal protein L24, putative	EHI_030760	C4LSA0	C4LSA0	19	23.1704	24.8331	19	19	19	0.233306	0.359536	3.33451			3	1	2	3	0	0	0	3	10.4	10.4	10.4	18.604	0	4.4987	39330000	8	10	1	2	3	0	0	0	163	163	4.3	6.1	10.4	0	0	0	0	9440500	29889000	0
AP-1 complex subunit gamma	EHI_118480	A0A8U0WP03	A0A8U0WP03	23.3307	22.0917	19	19	19	19	0.233427	0.359536	2.47415			1	1	1	1	1	1	0	1	1.3	1.3	1.3	97.055	0.0007148	1.8749	15020000	40	5	1	1	1	1	1	0	855	855	1.3	1.3	1.3	1.3	1.3	0	10550000	4469600	0	0
Ribose-phosphate pyrophosphokinase, putative	EHI_035650	C4LXZ5	C4LXZ5	19	21.6226	22.6768	19	19	19	0.233498	0.359536	2.09978			1	0	1	1	0	0	0	1	3.6	3.6	3.6	36.636	0.0013495	1.4591	9933700	17	2	0	1	1	0	0	0	332	332	0	3.6	3.6	0	0	0	0	3228800	6704900	0
Maelstrom domain-containing protein	EHI_192630	C4M1I0	C4M1I0	22.1207	21.2253	19	19	19	19	0.233521	0.359536	1.782			1	1	1	0	0	0	0	1	2.9	2.9	2.9	63.274	0	3.1595	7011900	30	2	1	1	0	0	0	0	544	544	2.9	2.9	0	0	0	0	4560300	2451600	0	0
Rab family GTPase	EHI_177550	A0A8U0WPK9	A0A8U0WPK9	23.1239	19	21.9354	19	19	19	0.233667	0.359536	2.35309			1	1	0	1	0	0	0	1	15.4	15.4	15.4	22.648	0.0050761	1.1479	13151000	11	4	1	0	1	0	0	0	201	201	15.4	0	15.4	0	0	0	9140700	0	4010600	0
Transporter, major facilitator family	EHI_005130	C4M0A6	C4M0A6	25.0273	19	23.2764	19	19	19	0.233933	0.359536	3.43457			2	2	0	1	0	0	0	1	5.8	5.8	3.6	56.227	0	3.327	44356000	11	2	1	0	1	0	0	0	496	496	5.8	0	3.6	0	0	0	34196000	0	10160000	0
Tetraspanin family protein	EHI_168280	C4M4R4	C4M4R4	24.2195	22.6822	19	19	19	19	0.234408	0.359536	2.96721			2	2	1	0	0	0	0	2	12.2	12.2	12.2	19.149	0	2.7106	26263000	4	3	2	1	0	0	0	0	172	172	12.2	5.2	0	0	0	0	19534000	6729900	0	0
Protein YIPF5	EHI_118700	B1N328	B1N328	19	23.2333	19	22.9743	23.2644	19	0.234449	0.359536	-2.70826			1	0	1	0	1	1	0	1	4.4	4.4	4.4	28.125	0.007458	1.0742	28177000	6	2	0	1	0	1	1	0	251	251	0	4.4	0	4.4	4.4	0	0	9860900	0	8240500
Selenoprotein F/M domain-containing protein	EHI_182530	C4LV34	C4LV34	23.0379	19	21.8394	19	19	19	0.23468	0.359536	2.29244			2	1	0	1	0	0	0	2	16.4	16.4	16.4	15.05	0.0013504	1.468	12364000	8	1	1	0	1	0	0	0	128	128	7	0	9.4	0	0	0	8612100	0	3752400	0
Cysteine proteinase, putative	EHI_151440	C4LSI6	C4LSI6	22.9891	24.7273	19	19	19	19	0.235493	0.359536	3.23881			2	1	2	0	0	0	0	2	9.7	9.7	9.7	35.281	0.0013928	1.6904	36101000	16	3	1	2	0	0	0	0	320	320	6.6	9.7	0	0	0	0	8325400	27776000	0	0
Palmitoyltransferase	EHI_054500	C4M2I1	C4M2I1	23.2123	21.9231	19	19	19	19	0.235812	0.359536	2.37848			1	1	1	0	0	0	0	1	5.8	5.8	5.8	25.814	0	3.7772	13695000	9	2	1	1	0	0	0	0	225	225	5.8	5.8	0	0	0	0	9718800	3976600	0	0
Uncharacterized protein	EHI_168290	C4M4R5	C4M4R5	22.6709	21.5399	19	19	19	19	0.236067	0.359536	2.07025			1	1	1	0	0	0	0	1	8.5	8.5	8.5	18.986	0	12.617	9726400	9	4	1	1	0	0	0	0	164	164	8.5	8.5	0	0	0	0	6677400	3049000	0	0
ENTH domain protein, putative; EH-domain containing protein, putative	EHI_052870	B1N3L7;C4LSV2	B1N3L7;C4LSV2	22.6086	19	24.2188	19	19	19	0.236123	0.359536	2.94249			1	1	0	1	0	0	0	1	21.1	1.6	1.6	57.598	1	-2	25921000	29	3	1	0	1	0	0	0	507	NaN	15.2	13.4	7.9	3.9	3.9	3.9	6395600	0	19525000	0
AIG1 family protein	EHI_089670	C4MBS5;C4MB95	C4MBS5;C4MB95	22.6575	19	21.5206	19	19	19	0.236417	0.359536	2.05938			2	2	0	1	0	0	0	2	7.3	7.3	7.3	42.226	0	6.1036	9624500	13	3	2	0	1	0	0	0	386	NaN	7.3	0	4.4	0	0	0	6616000	0	3008500	0
Protein RFT1 homolog	EHI_151240	C4LSG7	C4LSG7	19	22.0472	23.4221	19	19	19	0.236427	0.359536	2.48978			1	1	1	1	0	0	0	1	2.6	2.6	2.6	56.769	0	2.3528	15574000	20	4	1	1	1	0	0	0	495	495	2.6	2.6	2.6	0	0	0	0	4333800	11240000	0
cysteine--tRNA ligase	EHI_169700	C4M8V1	C4M8V1	28.6224	25.6201	19	19	19	19	0.236567	0.359536	5.41418			2	2	1	0	0	0	0	2	2.4	2.4	2.4	80.198	0.0038462	1.1932	464820000	36	4	2	1	0	0	0	0	701	701	2.4	1.3	0	0	0	0	413249984	51573000	0	0
PRA1 family protein	EHI_159820	B1N2V2	B1N2V2	26.0672	23.856	19	19	19	19	0.236679	0.359536	3.97442			1	1	1	0	0	0	0	1	8.1	8.1	8.1	18.024	0.0013316	1.3794	85494000	4	2	1	1	0	0	0	0	160	160	8.1	8.1	0	0	0	0	70310000	15184000	0	0
Uncharacterized protein	EHI_068500	C4LU41	C4LU41	25.9934	23.0142	25.1024	19	23.9841	22.5681	0.237022	0.359536	3.21132			4	2	2	3	0	3	2	4	15.5	15.5	15.5	24.613	0	32.703	134110000	9	14	2	2	3	0	3	2	213	213	8.5	10.8	13.1	0	13.1	8.5	66803000	8471800	36023000	0
Beta-amylase	EHI_192590	C4M1H6;C4LYK5;B1N3U6;B1N2L4	C4M1H6	26.5054	25.5484	26.1774	25.7615	25.1063	23.3744	0.237513	0.359536	0.643174			6	3	4	4	4	3	1	6	18.1	18.1	18.1	47.308	0	10.459	324090000	21	23	3	4	4	4	3	1	436	NaN	8.5	7.6	12.4	7.6	5.7	2.5	95259000	49071000	75889000	56882000
Heat shock protein 70, putative	EHI_052860	C4M3S5;C4M1G4;B1N486;C4M9V9;C4LZ45;B1N4N6;B1N5L0;C4M8D4;B1N5W1;C4MBG4;B1N5M8;B1N4F7;B1N5J5;B1N398;B1N5L3;B1N5L2;B1N5B9	C4M3S5	28.397	26.7129	28.7678	26.6618	26.8458	25.7833	0.237513	0.359536	1.20546			15	11	7	9	6	8	5	15	27.4	27.4	27.4	71.54	0	177.42	1205100000	36	82	11	7	9	6	8	5	656	NaN	20.3	14.3	16.9	13.3	16.5	9	353470016	110000000	457060000	106170000
Thioredoxin domain-containing protein	EHI_175280	B1N3J4	B1N3J4	21.8285	19	20.9254	19	19	19	0.237515	0.359536	1.58463			1	1	0	1	0	0	0	1	2.7	2.7	2.7	59.739	0.00075815	2.2303	5715700	30	2	1	0	1	0	0	0	510	510	2.7	0	2.7	0	0	0	3724100	0	1991500	0
NADP-dependent alcohol dehydrogenase, putative	EHI_107210	C4M162	C4M162	19	21.0455	22.0085	19	19	19	0.237626	0.359536	1.68465			2	0	1	1	0	0	0	2	7.4	5.4	5.4	39.649	0	3.8396	6383400	15	2	0	1	1	0	0	0	367	367	1.9	6.3	7.4	1.9	1.9	1.9	0	2164300	4219000	0
NECAP PHear domain-containing protein	EHI_007350	C4M7C6	C4M7C6	23.5759	22.1002	19	19	19	19	0.237945	0.359536	2.55871			1	1	1	0	0	0	0	1	12.8	12.8	12.8	24.391	0	3.8039	17000000	15	2	1	1	0	0	0	0	218	218	12.8	12.8	0	0	0	0	12504000	4496100	0	0
Uncharacterized protein	EHI_146110	C4M3Q5	C4M3Q5	24.7218	19	27.4471	19	19	19	0.237965	0.359536	4.72298			1	1	0	1	0	0	0	1	1.8	1.8	1.8	42.811	0.0099357	0.79129	210650000	21	7	1	0	1	0	0	0	397	397	1.8	0	1.8	0	0	0	27670000	0	182980000	0
Uncharacterized protein	EHI_012300	C4LTM3	C4LTM3	23.2909	19	21.8996	19	19	19	0.238185	0.359536	2.39684			2	1	0	1	0	0	0	2	2.4	2.4	2.4	105.41	0.0013405	1.4204	14175000	39	2	1	0	1	0	0	0	914	914	1	0	1.4	0	0	0	10263000	0	3912300	0
Uncharacterized protein	EHI_076140	B1N481	B1N481	21.6158	19	22.8812	19	19	19	0.238428	0.359536	2.16568			2	1	0	2	0	0	0	2	3.3	3.3	3.3	72.301	0	2.3407	10939000	29	3	1	0	2	0	0	0	608	608	1.5	0	3.3	0	0	0	3213700	0	7725700	0
Protein-S-isoprenylcysteine O-methyltransferase	EHI_045150	C4LTC8	C4LTC8	24.4296	19	22.6582	19	19	19	0.238458	0.359536	3.02927			1	1	0	1	0	0	0	1	4.5	4.5	4.5	26.588	0	2.9141	29216000	6	0	1	0	1	0	0	0	221	221	4.5	0	4.5	0	0	0	22597000	0	6619000	0
Rab family GTPase	EHI_003020	B1N4G8	B1N4G8	19	21.0501	22.0446	19	19	19	0.238513	0.359536	1.69822			1	0	1	1	0	0	0	1	7.9	7.9	7.9	21.098	0.0013689	1.5798	6497200	11	3	0	1	1	0	0	0	189	189	0	7.9	7.9	0	0	0	0	2171200	4326000	0
SMP-LTD domain-containing protein	EHI_192750	C4M915	C4M915	25.9142	19	23.6347	19	19	19	0.238931	0.359536	3.84961			5	5	0	2	0	0	0	5	11.2	11.2	11.2	59.745	0	16.981	76257000	25	12	5	0	2	0	0	0	509	509	11.2	0	5.7	0	0	0	63233000	0	13024000	0
Symplekin C-terminal domain-containing protein	EHI_042130	C4M4G7	C4M4G7	24.3788	19	22.6017	19	19	19	0.239028	0.359536	2.99349			3	3	0	1	0	0	0	3	3.7	3.7	3.7	95.519	0	2.9175	28179000	43	4	3	0	1	0	0	0	815	815	3.7	0	1.1	0	0	0	21814000	0	6364900	0
Rho guanine nucleotide exchange factor, putative	EHI_021230	C4M038	C4M038	23.0366	22.5072	22.9538	22.0596	22.683	22.402	0.239033	0.359536	0.461171			1	1	1	1	1	1	1	1	2.6	2.6	2.6	52.849	0.00073801	2.0776	39336000	24	7	1	1	1	1	1	1	455	455	2.6	2.6	2.6	2.6	2.6	2.6	8603900	5961200	8124100	4371300
Transketolase, putative (Fragment); transketolase	EHI_157770	B1N5J9;C4M818;B1N3S8	B1N5J9;C4M818;B1N3S8	24.7129	19	22.8128	19	19	22.8726	0.23934	0.359668	3.17523			1	1	0	1	0	0	1	1	2	2	2	50.507	0.0098039	0.99857	42548000	18	4	1	0	1	0	0	1	457	NaN	2	0	2	0	0	2	27500000	0	7367600	0
Uncharacterized protein	EHI_152120	C4LSQ0	C4LSQ0	26.321	23.8727	19	19	19	19	0.239597	0.359724	4.06455			3	3	1	0	0	0	0	3	8.2	8.2	8.2	30.656	0	3.5671	99190000	8	8	3	1	0	0	0	0	256	256	8.2	3.5	0	0	0	0	83830000	15360000	0	0
Importin alpha	EHI_154300	C4M593	C4M593	19	21.7185	23.1023	19	19	19	0.240009	0.359925	2.27361			2	0	1	2	0	0	0	2	5.3	5.3	5.3	55.702	0	2.9673	12456000	19	3	0	1	2	0	0	0	487	487	0	3.1	5.3	0	0	0	0	3450900	9005000	0
N-system amino acid transporter 1, putative	EHI_050900	C4LTW0	C4LTW0	25.082	19	23.0237	19	19	19	0.24017	0.359925	3.36855			1	1	0	1	0	0	0	1	2.1	2.1	2.1	75.12	0.0013486	1.4579	44044000	25	3	1	0	1	0	0	0	674	674	2.1	0	2.1	0	0	0	35516000	0	8527400	0
synthase, putative	EHI_026480	C4M5W1	C4M5W1	22.5521	19	21.3196	19	19	19	0.241426	0.361479	1.95723			1	1	0	1	0	0	0	1	5.4	5.4	5.4	29.179	0	10.044	8766900	14	0	1	0	1	0	0	0	259	259	5.4	0	5.4	0	0	0	6149700	0	2617200	0
Transmembrane protein	EHI_113550	B1N4L1	B1N4L1	26.2741	19	23.7337	19	19	19	0.241768	0.361559	4.00259			5	5	1	2	1	1	0	5	19.6	19.6	19.6	39.62	0	10.339	95101000	16	13	5	1	2	1	1	0	347	347	19.6	4.3	7.2	2.6	2.6	0	81152000	0	13949000	0
G domain-containing protein	EHI_007360	B1N432	B1N432	23.4803	21.911	19	19	19	19	0.241921	0.361559	2.46375			2	2	1	1	0	0	0	2	5.5	5.5	5.5	49.593	0.0063052	1.1218	15646000	30	4	2	1	1	0	0	0	438	438	5.5	2.3	3.2	0	0	0	11702000	3943400	0	0
Tyrosine kinase, putative	EHI_083440	C4M762	C4M762	25.8284	24.5895	25.5412	24.8813	24.1432	23.0883	0.242467	0.361955	0.807429			5	3	1	3	2	1	1	5	7.4	6.8	6.8	138.47	0	90.245	192010000	57	21	3	1	3	2	1	1	1228	1228	4.9	1.5	5.3	2.4	1.5	1.5	59583000	25245000	48828000	30905000
Uncharacterized protein	EHI_093820	C4LYH3	C4LYH3	23.1121	19	21.6528	19	19	19	0.242627	0.361955	2.25496			1	1	0	1	0	0	0	1	3.3	3.3	3.3	48.017	0.0013774	1.6096	12363000	22	3	1	0	1	0	0	0	422	422	3.3	0	3.3	0	0	0	9066200	0	3297200	0
Sulfotransferase	EHI_166030	C4MA42	C4MA42	21.8441	19	23.4223	19	19	19	0.242937	0.362088	2.42212			2	1	0	2	0	0	0	2	5.4	5.4	5.4	51.763	0	6.0092	15006000	23	3	1	0	2	0	0	0	441	441	2.7	0	5.4	0	0	0	3764700	0	11241000	0
Coatomer subunit beta	EHI_004590	A0A8U0WQ02	A0A8U0WQ02	26.2474	24.029	25.5308	23.7096	24.3016	23.6884	0.243287	0.362118	1.26349			6	5	2	3	2	2	1	6	8.5	8.5	8.5	91.245	0	18.067	193170000	44	24	5	2	3	2	2	1	800	800	6.6	2.9	3.9	3.8	3.8	1.9	79665000	17118000	48476000	13718000
Protein kinase, putative	EHI_097640	C4M935	C4M935	25.9961	19	23.4765	19	19	19	0.243449	0.362118	3.82422			3	2	0	2	0	0	0	3	4.2	4.2	4.2	78.175	0	2.3534	78600000	35	4	2	0	2	0	0	0	686	686	2.5	0	3.1	0	0	0	66928000	0	11672000	0
UPF0020 domain-containing protein	EHI_023130	C4LUM5	C4LUM5	19	20.874	21.9337	19	19	19	0.243618	0.362118	1.60257			1	1	1	1	0	0	0	1	2.7	2.7	2.7	50.307	0.0013746	1.6057	5927800	20	3	1	1	1	0	0	0	437	437	2.7	2.7	2.7	0	0	0	0	1921800	4005900	0
Uncharacterized protein	EHI_006020	C4M2N6	C4M2N6	19	21.9755	19	21.8915	21.7919	21.5081	0.244436	0.362291	-1.84989			1	0	1	0	1	1	1	1	3.8	3.8	3.8	33.871	0.0038685	1.2308	14628000	11	4	0	1	0	1	1	1	293	293	0	3.8	0	3.8	3.8	3.8	0	4123700	0	3890500
Intimal thickness related receptor IRP domain-containing protein	EHI_148210	C4LSZ1	C4LSZ1	25.064	22.8368	19	19	19	19	0.244593	0.362291	3.30028			2	2	1	0	0	1	0	2	4.4	4.4	4.4	50.456	0	4.5603	42568000	15	7	2	1	0	0	1	0	436	436	4.4	2.5	0	0	2.5	0	35077000	7491500	0	0
Amino acid transporter, putative	EHI_185430	C4M8D5	C4M8D5	24.9391	22.7543	19	19	19	19	0.244688	0.362291	3.23115			1	1	1	0	0	1	0	1	1.6	1.6	1.6	78.307	0	5.6673	39244000	25	5	1	1	0	0	1	0	686	686	1.6	1.6	0	0	1.6	0	32168000	7075200	0	0
Sir2 family transcriptional regulator, putative	EHI_007500	C4LYC2	C4LYC2	24.423	19	22.4234	19	19	19	0.244829	0.362291	2.94882			2	2	0	1	0	0	0	2	7	7	7	38.834	0	4.1922	28119000	20	5	2	0	1	0	0	0	344	344	7	0	3.5	0	0	0	22494000	0	5625000	0
Hypothetical membrane-spanning protein	EHI_100500	C4M0T8	C4M0T8	25.5846	23.1563	19	19	19	19	0.244839	0.362291	3.5803			3	3	1	0	0	0	0	3	7.5	7.5	7.5	52.403	0.0038635	1.2291	59668000	14	3	3	1	0	0	0	0	453	453	7.5	2.6	0	0	0	0	50319000	9348400	0	0
Nucleosome assembly protein	EHI_104530	C4LZ63	C4LZ63	19	21.0664	22.287	19	19	19	0.245257	0.362547	1.78449			1	1	1	1	0	0	0	1	2.9	2.9	2.9	36.842	0.0044558	1.1554	7313600	21	3	1	1	1	0	0	0	313	313	2.9	2.9	2.9	0	0	0	0	2196000	5117600	0
Transmembrane protein	EHI_153730	C4LSF3	C4LSF3	25.3266	22.9698	19	19	19	19	0.245454	0.362547	3.43211			3	2	1	0	0	0	0	3	6.7	6.7	6.7	41.177	0.0050858	1.1496	50293000	20	2	2	1	0	0	0	0	356	356	4.5	2.2	0	0	0	0	42078000	8214600	0	0
HEAT repeat domain containing protein	EHI_110580	C4LUA7	C4LUA7	23.459	21.7737	19	19	19	19	0.246366	0.363342	2.41089			2	1	1	1	0	0	0	2	2.6	2.6	2.6	85.677	0.0099125	0.78057	15116000	32	3	1	1	1	0	0	0	765	765	1.2	1.4	1.4	0	0	0	11531000	3585300	0	0
Thioredoxin, putative	EHI_006700	C4M0E3	C4M0E3	21.9624	19	20.8389	19	19	19	0.246582	0.363342	1.60043			1	1	0	1	0	0	0	1	6.7	6.7	6.7	17.637	0.010024	0.83239	5961900	11	3	1	0	1	0	0	0	150	150	6.7	0	6.7	0	0	0	4086300	0	1875600	0
Rab family GTPase	EHI_040450	A0A8U0WNZ5	A0A8U0WNZ5	22.4345	19	24.5366	19	19	19	0.246656	0.363342	2.99036			2	1	0	1	0	0	0	2	10	10	10	24.088	0.0080595	1.0657	30004000	12	2	1	0	1	0	0	0	209	209	4.3	0	5.7	0	0	0	5668300	0	24336000	0
Uncharacterized protein	EHI_000250	C4LZ88	C4LZ88	23.934	19	22.0388	19	19	19	0.24742	0.363818	2.6576			1	1	0	1	0	0	0	1	7.4	7.4	7.4	24.621	0	31.569	20336000	5	3	1	0	1	0	0	0	216	216	7.4	0	7.4	0	0	0	16027000	0	4308600	0
p-glycoprotein 6, putative	EHI_081130	B1N3U1	B1N3U1	26.5622	23.6432	19	19	19	19	0.247749	0.363818	4.06847			4	4	1	0	0	0	0	4	12.8	10.5	10.5	57.758	0	35.699	112190000	19	6	4	1	0	0	0	0	524	524	12.8	1.7	0	0	0	0	99090000	13101000	0	0
Uncharacterized protein	EHI_134970	C4M0Y4	C4M0Y4	22.5103	19	21.1551	19	19	19	0.247761	0.363818	1.88844			2	2	0	1	0	0	0	2	6.8	6.8	6.8	33.816	0.00070126	1.7217	8309200	18	3	2	0	1	0	0	0	294	294	6.8	0	3.4	0	0	0	5974000	0	2335100	0
Phospholipase B-like	EHI_118820	C4LYN0	C4LYN0	24.8947	21.5639	23.9476	22.6212	19	19	0.248203	0.363818	2.65815			3	3	2	2	2	1	0	3	8.3	8.3	8.3	63.756	0	9.5144	56924000	22	15	3	2	2	2	1	0	552	552	8.3	5.6	5.6	5.6	3.1	0	31193000	3100100	16179000	6451400
Transporter, major facilitator family	EHI_134730	C4M022	C4M022	23.8589	21.9695	19	19	19	19	0.24825	0.363818	2.60946			1	1	1	0	0	0	0	1	4.6	4.6	4.6	58.852	0	2.3286	19320000	18	2	1	1	0	0	0	0	525	525	4.6	4.6	0	0	0	0	15214000	4106500	0	0
Phospholipid-transporting ATPase	EHI_096620	C4LWH4	C4LWH4	25.5508	23.0013	19	19	19	19	0.248309	0.363818	3.51734			4	4	1	0	0	0	0	4	3.6	3.6	3.6	132.3	0	3.4707	57549000	53	3	4	1	0	0	0	0	1166	1166	3.6	0.8	0	0	0	0	49153000	8395900	0	0
Battenin	EHI_142150	C4LW60	C4LW60	24.5894	22.4039	19	19	19	19	0.248631	0.363964	2.99779			1	1	1	0	0	0	0	1	2.2	2.2	2.2	51.151	0	6.4236	30793000	11	2	1	1	0	0	0	0	445	445	2.2	2.2	0	0	0	0	25244000	5549500	0	0
Purine nucleoside phosphorylase, putative	EHI_130960	C4LXG4;B1N3G7	C4LXG4	27.0577	26.0452	25.5645	19	25.9183	24.0791	0.249268	0.364437	3.76331			7	4	3	5	0	2	1	7	35.3	35.3	35.3	26.269	0	20.859	339690000	14	18	4	3	5	0	2	1	238	NaN	20.2	11.3	24.8	0	9.7	5	139690000	69246000	49622000	0
Uncharacterized protein	EHI_076030	B1N480	B1N480	23.7078	19	21.8382	19	19	19	0.249733	0.364437	2.51532			2	2	0	1	0	0	0	2	3.9	3.9	3.9	47.189	0.0098722	0.76382	17450000	21	4	2	0	1	0	0	0	434	434	3.9	0	2.3	0	0	0	13701000	0	3749300	0
Protein YIPF	EHI_002670	C4MBB0	C4MBB0	24.858	22.5299	19	19	19	19	0.249786	0.364437	3.12931			1	1	1	0	0	0	0	1	5.4	5.4	5.4	19.503	0	2.943	36465000	4	2	1	1	0	0	0	0	203	203	5.4	5.4	0	0	0	0	30409000	6056000	0	0
CAAX amino terminal protease family	EHI_194580	C4LZW9;C4LZT2	C4LZW9	25.5298	19	22.9258	19	19	19	0.250036	0.364437	3.48517			3	3	0	1	0	0	0	3	12.7	12.7	12.7	32.353	0	14.016	56410000	10	3	3	0	1	0	0	0	283	NaN	12.7	0	4.2	0	0	0	48442000	0	7967900	0
Eukaryotic peptide chain release factor subunit 1, putative	EHI_152750	C4LSV8	C4LSV8	19	21.01	22.3441	19	19	19	0.250064	0.364437	1.78467			1	0	1	1	0	0	0	1	1.9	1.9	1.9	53.099	0.0068707	1.098	7435700	25	3	0	1	1	0	0	0	468	468	0	1.9	1.9	0	0	0	0	2111700	5323900	0
Actin, putative	EHI_039070	C4LZS8	C4LZS8	23.675	19	21.8014	19	19	19	0.250399	0.3646	2.49214			3	3	0	1	0	0	0	3	13.3	13.3	13.3	39.99	0	9.3644	17048000	22	4	3	0	1	0	0	0	360	360	13.3	0	4.4	0	0	0	13393000	0	3655000	0
Auxin efflux carrier family protein, putative	EHI_195130	C4M416	C4M416	27.565	24.1176	19	19	19	19	0.250721	0.364746	4.56086			7	7	1	0	0	0	0	7	22.1	22.1	22.1	47.811	0	81.961	216760000	19	15	7	1	0	0	0	0	426	426	22.1	2.1	0	0	0	0	198560000	18202000	0	0
Leucine rich repeat / protein phosphatase 2C domain containing protein	EHI_167290	C4MAF8	C4MAF8	23.4171	19	21.6153	19	19	19	0.251738	0.3659	2.34414			2	2	0	1	0	0	0	2	4.2	4.2	4.2	96.245	0.00072098	1.9221	14413000	41	3	2	0	1	0	0	0	861	861	4.2	0	1.3	0	0	0	11201000	0	3212600	0
Oxidoreductase, putative	EHI_125740	C4LVW1	C4LVW1	24.7028	19	22.323	19	19	19	0.253547	0.36761	3.00858			2	2	0	1	0	0	0	2	9.8	9.8	9.8	35.573	0	21.288	32554000	18	3	2	0	1	0	0	0	316	316	9.8	0	6	0	0	0	27307000	0	5246700	0
High-affinity potassium uptake transporter, putative	EHI_199020	C4LWU8	C4LWU8	25.3706	19	22.7088	19	19	19	0.25365	0.36761	3.35979			3	3	0	1	0	0	0	3	5.2	5.2	5.2	83.163	0	6.9686	50238000	33	6	3	0	1	0	0	0	733	733	5.2	0	2.6	0	0	0	43382000	0	6855300	0
Leucine rich repeat protein, BspA family	EHI_113990	C4M8W5	C4M8W5	22.9874	19	21.3204	19	19	19	0.253697	0.36761	2.10262			2	2	0	1	0	0	0	2	2.3	2.3	2.3	127.28	0.00070274	1.7315	10935000	54	3	2	0	1	0	0	0	1115	1115	2.3	0	1.5	0	0	0	8315900	0	2618700	0
AP-5 complex subunit beta-1	EHI_023480	C4LUQ7	C4LUQ7	24.8975	22.4285	19	19	19	19	0.25381	0.36761	3.10868			2	2	1	0	0	0	0	2	2.1	2.1	2.1	106.76	0.0013441	1.4452	36898000	48	3	2	1	0	0	0	0	938	938	2.1	0.9	0	0	0	0	31253000	5645000	0	0
Ribosome biogenesis protein BMS1, putative	EHI_196410	C4M9R3	C4M9R3	21.8486	19	23.9187	19	19	19	0.25425	0.367923	2.5891			2	1	0	2	0	0	0	2	2.2	2.2	2.2	111.93	0	2.5283	19635000	48	3	1	0	2	0	0	0	975	975	0.9	0	2.2	0	0	0	3776400	0	15858000	0
Protein Abitram	EHI_138450	C4M3I7	C4M3I7	22.739	21.1591	19	19	19	19	0.254587	0.368086	1.96604			1	1	1	1	0	0	0	1	9.1	9.1	9.1	21.384	0.00074405	2.131	9342200	6	3	1	1	1	0	0	0	187	187	9.1	9.1	9.1	0	0	0	7000600	2341600	0	0
phosphoserine transaminase	EHI_026360	A0A8U0WQ20;B1N376	A0A8U0WQ20;B1N376	19	22.3531	22.9354	23.8561	23.4604	23.1116	0.25554	0.369138	-2.22879			2	0	1	1	2	1	1	2	5	5	5	40.533	0.0044671	1.1785	49168000	15	6	0	1	1	2	1	1	358	NaN	0	2.2	2.2	5	2.8	2.8	0	5357300	8021000	15185000
Patatin-like phospholipase, putative	EHI_014360	C4LXS2	C4LXS2	22.8663	21.1864	19	19	19	19	0.257021	0.370951	2.01757			1	1	1	0	0	0	0	1	3.1	3.1	3.1	55.509	0	7.8937	10033000	28	2	1	1	0	0	0	0	481	481	3.1	3.1	0	0	0	0	7646200	2386400	0	0
WD domain containing protein	EHI_151370	C4LSH9	C4LSH9	21.1459	19	22.8284	19	19	19	0.258067	0.371733	1.99142			3	2	0	1	0	0	0	3	3.1	3.1	3.1	98.302	0.010083	0.854	9768100	47	3	2	0	1	0	0	0	881	881	2.3	0	0.8	0	0	0	2320300	0	7447800	0
Ras guanine nucleotide exchange factor, putative	EHI_070760	C4M5T3	C4M5T3	22.1043	19	24.5443	19	19	19	0.258194	0.371733	2.88287			3	1	0	3	0	0	0	3	7.2	7.2	7.2	67.692	0	17.509	28975000	27	5	1	0	3	0	0	0	583	583	2.9	0	7.2	0	0	0	4508900	0	24466000	0
Long-chain-fatty-acid--CoA ligase, putative	EHI_029050	C4M4W9	C4M4W9	22.4213	19	20.9058	19	19	19	0.258807	0.371733	1.7757			2	1	0	1	0	0	0	2	5.1	5.1	5.1	68.919	0	2.4877	7581300	31	1	1	0	1	0	0	0	613	613	2.4	0	2.6	0	0	0	5616700	0	1964600	0
Clathrin-adaptor medium chain, putative	EHI_099240	A0A8U0WPK8	A0A8U0WPK8	23.7018	21.6145	19	19	19	19	0.259014	0.371733	2.43877			1	1	1	0	0	0	0	1	3.3	3.3	3.3	48.03	0.0019934	1.3708	16855000	22	2	1	1	0	0	0	0	426	426	3.3	3.3	0	0	0	0	13644000	3210900	0	0
NAD synthetase, putative	EHI_134830	C4M032	C4M032	23.489	19	21.4942	19	19	19	0.259111	0.371733	2.32772			2	2	0	1	0	0	0	2	6.9	6.9	6.9	34.347	0.0013541	1.4853	14727000	13	3	2	0	1	0	0	0	306	306	6.9	0	4.2	0	0	0	11773000	0	2953900	0
receptor protein serine/threonine kinase	EHI_174100	C4M258	C4M258	24.1078	22.092	25.2691	23.1848	19	19	0.259154	0.371733	2.73056			2	2	1	1	1	0	0	2	6.5	6.5	6.5	75.747	0	61.811	72518000	37	7	2	1	1	1	0	0	660	660	6.5	3.2	3.2	3.2	0	0	18079000	4470600	40434000	9535200
Ras guanine nucleotide exchange factor, putative	EHI_023270	C4LUN8	C4LUN8	22.6534	21.0265	19	19	19	19	0.259313	0.371733	1.89328			1	1	1	0	0	0	0	1	1.4	1.4	1.4	104.1	0.010101	0.88088	8732900	44	2	1	1	0	0	0	0	910	910	1.4	1.4	0	0	0	0	6596900	2136000	0	0
Thioredoxin, putative	EHI_021560	C4M067	C4M067	24.725	19	22.174	19	19	19	0.259375	0.371733	2.96632			3	2	0	1	0	0	0	3	10.6	10.6	10.6	42.973	0	11.113	32463000	16	3	2	0	1	0	0	0	379	379	6.6	0	4	0	0	0	27731000	0	4731800	0
Uncharacterized protein	EHI_163520	C4M3T3	C4M3T3	23.7669	21.6053	19	19	19	19	0.261098	0.373876	2.45738			2	2	1	0	0	0	0	2	10.5	10.5	10.5	34.041	0	9.6599	17465000	16	3	2	1	0	0	0	0	296	296	10.5	5.1	0	0	0	0	14274000	3190300	0	0
Integral membrane protein	EHI_092680	B1N2N7;B1N4Z2	B1N2N7	27.5349	24.7	23.0158	21.546	23.5106	19	0.261737	0.374464	2.55524			4	4	2	1	1	1	1	4	12.2	12.2	12.2	44.356	0	46.583	245210000	12	22	4	2	1	1	1	1	400	NaN	12.2	6.8	3.8	3.8	3.8	3.8	194460000	27255000	8481100	3062000
Ribosome control protein 1 domain-containing protein	EHI_108730	C4M837	C4M837	23.265	21.3011	19	19	19	19	0.262668	0.375469	2.1887			2	2	1	0	0	0	0	2	3.6	3.6	3.6	77.599	0.00074239	2.1077	12664000	40	2	2	1	0	0	0	0	671	671	3.6	1.8	0	0	0	0	10080000	2583900	0	0
SMP-LTD domain-containing protein	EHI_181210	C4M5Z3	C4M5Z3	24.5426	21.9618	19	19	19	19	0.263851	0.376515	2.83481			2	2	1	0	0	0	0	2	4.1	4.1	4.1	76.948	0	6.7042	28523000	38	5	2	1	0	0	0	0	659	659	4.1	2.1	0	0	0	0	24438000	4084700	0	0
Ras GTPase activating protein, putative	EHI_065610	C4LZX7	C4LZX7	19	20.3198	21.4855	19	19	19	0.26463	0.376515	1.26843			1	0	1	1	0	0	0	1	1.7	1.7	1.7	68.745	0.0026178	1.3163	4244900	34	1	0	1	1	0	0	0	604	604	0	1.7	1.7	0	0	0	0	1308800	2936100	0
Cation transporter, putative	EHI_025250	C4M312	C4M312	24.9704	22.1581	19	19	19	19	0.265109	0.376515	3.04285			2	2	1	0	0	0	0	2	6.1	6.1	6.1	35.495	0	2.9106	37553000	9	3	2	1	0	0	0	0	314	314	6.1	3.8	0	0	0	0	32873000	4680200	0	0
non-specific serine/threonine protein kinase	EHI_044190	C4M791	C4M791	24.01	20.8642	21.1028	20.919	19	19	0.265416	0.376515	2.03282			2	1	1	1	1	0	0	2	1.5	1.5	1.5	147.09	0	2.7074	23038000	55	4	1	1	1	1	0	0	1301	1301	0.5	1	1	1	0	0	16894000	1908800	2252000	1982700
Transmembrane protein	EHI_035230	C4M4Z0	C4M4Z0	24.1565	21.7168	19	19	19	19	0.265603	0.376515	2.62445			2	2	1	1	0	0	0	2	7.1	7.1	7.1	38.092	0	2.8439	22147000	12	4	2	1	1	0	0	0	339	339	7.1	4.1	4.1	0	0	0	18700000	3446800	0	0
Uncharacterized protein	EHI_197320	C4LVE8	C4LVE8	19	21.322	23.4076	19	19	21.6455	0.265616	0.376515	2.24317			2	0	1	1	0	0	1	2	4.4	4.4	4.4	66.266	0.00070323	1.7519	17029000	34	4	0	1	1	0	0	1	573	573	0	1.9	1.9	0	0	2.4	0	2621500	11127000	0
Uncharacterized protein	EHI_170590	C4M6V2	C4M6V2	24.6131	19	21.9495	19	19	19	0.265935	0.376515	2.85422			1	1	0	1	0	0	0	1	10	10	10	21.436	0	57.668	29712000	1	7	1	0	1	0	0	0	190	190	10	0	10	0	0	0	25662000	0	4050100	0
proteasome endopeptidase complex	EHI_024470	C4M0I9	C4M0I9	22.9233	21.0612	19	19	19	19	0.265956	0.376515	1.99486			1	1	1	0	0	0	0	1	9.4	9.4	9.4	22.624	0	9.3718	10143000	10	1	1	1	0	0	0	0	213	213	9.4	9.4	0	0	0	0	7954500	2188100	0	0
UMP-CMP kinase, putative	EHI_044740	C4LT93	C4LT93	19	22.2112	25.156	19	19	19	0.266849	0.376515	3.12239			2	0	1	2	0	0	0	2	10.9	10.9	10.9	22.961	0.00074019	2.0804	42240000	12	2	0	1	2	0	0	0	201	201	0	6	10.9	0	0	0	0	4855600	37385000	0
Ribosome maturation protein SDO1/SBDS N-terminal domain-containing protein	EHI_151360	C4LSH8	C4LSH8	19	21.1351	23.1267	19	19	19	0.267875	0.376515	2.08727			2	0	1	1	0	0	0	2	8.1	8.1	8.1	27.469	0.0026368	1.3391	11461000	14	2	0	1	1	0	0	0	246	246	0	4.5	3.7	0	0	0	0	2303100	9158400	0
Uncharacterized protein	EHI_008120	C4LYE6	C4LYE6	27.0834	26.3913	27.6773	26.6525	25.9854	24.7977	0.268658	0.376515	0.731683			4	2	4	4	4	4	3	4	15.8	15.8	15.8	36.86	0	187.02	645950000	12	40	2	4	4	4	4	3	329	329	7.6	15.8	15.8	15.8	15.8	13.4	142210000	88017000	214630000	105490000
N-acetylglucosaminylphosphatidylinositol deacetylase	EHI_015270	C4M0W5	C4M0W5	25.4699	19	22.3248	19	19	19	0.268736	0.376515	3.26489			1	1	0	1	0	0	0	1	7.2	7.2	7.2	27.732	0	23.952	51727000	13	6	1	0	1	0	0	0	237	237	7.2	0	7.2	0	0	0	46473000	0	5253300	0
Rhodanese domain-containing protein	EHI_177300	C4LY34	C4LY34	27.7096	25.5635	26.0405	22.3777	26.1052	25.8686	0.268974	0.376515	2.19645			6	5	2	3	1	2	2	6	12.1	12.1	12.1	68.957	0	62.434	477010000	31	25	5	2	3	1	2	2	610	610	10.7	4.3	5.7	2.3	4.3	4.3	219500000	49588000	69020000	5449600
Histidine acid phosphatase family protein	EHI_039860	C4MA90	C4MA90	25.6282	25.0216	26.3934	24.8535	25.1023	24.7096	0.269712	0.376515	0.7032			4	2	2	3	1	3	1	4	7.1	7.1	7.1	48.814	0	8.9185	267840000	23	14	2	2	3	1	3	1	420	420	4.3	4.3	4.5	2.1	6.9	2.1	51863000	34060000	88148000	30314000
Tyrosine phosphatase	EHI_181200	C4M5Z2	C4M5Z2	26.7944	22.9667	19	19	19	19	0.26997	0.376515	3.92035			3	3	1	0	0	0	0	3	12.1	12.1	12.1	32.544	0	9.515	124590000	18	7	3	1	0	0	0	0	282	282	12.1	5.3	0	0	0	0	116390000	8197000	0	0
Dilute domain-containing protein	EHI_192140	C4M754	C4M754	23.6383	21.3475	19	19	19	19	0.270671	0.376515	2.32862			3	2	1	0	0	0	0	3	5.3	5.3	5.3	66.586	0	2.7257	15726000	37	3	2	1	0	0	0	0	581	581	3.4	1.9	0	0	0	0	13057000	2668400	0	0
Transporter, major facilitator family	EHI_156230	C4M4C3	C4M4C3	24.9224	21.996	19	19	19	19	0.270735	0.376515	2.9728			2	2	1	0	0	0	0	2	3.2	3.2	3.2	56.453	0.010119	0.88214	35980000	11	3	2	1	0	0	0	0	507	507	3.2	1.8	0	0	0	0	31798000	4182600	0	0
Protein kinase domain containing protein	EHI_052060	C4M847	C4M847	19	19	19	19	19.7136	19	0.272228	0.376515	-0.356779			2	1	0	0	0	1	0	2	7.2	7.2	7.2	39.498	0.003866	1.2301	859750	17	1	1	0	0	0	1	0	346	346	3.5	0	0	0	3.8	0	0	0	0	0
VPS9 domain-containing protein	EHI_163600	C4M3U1	C4M3U1	19	19	19	19	20.9318	19	0.272228	0.376515	-0.965893			1	0	0	0	1	1	0	1	2.5	2.5	2.5	71.444	0.00075301	2.202	2000300	35	2	0	0	0	1	1	0	628	628	0	0	0	2.5	2.5	0	0	0	0	0
MPN domain-containing protein	EHI_050500	C4LTS3	C4LTS3	19	19	19	19	21.2361	19	0.272228	0.376515	-1.11807			1	0	0	0	0	1	0	1	3.5	3.5	3.5	36.508	0.0013699	1.5805	2470100	18	1	0	0	0	0	1	0	318	318	0	0	0	0	3.5	0	0	0	0	0
EF-hand domain-containing protein	EHI_106260	B1N3J3	B1N3J3	19	19	19	19	21.5782	19	0.272228	0.376515	-1.2891			2	0	0	0	1	1	0	2	1.2	0.9	0.9	294.34	0.0013643	1.5523	3131000	143	3	0	0	0	1	1	0	2532	2532	0	0	0.3	0.5	0.5	0	0	0	0	0
inorganic diphosphatase	EHI_124880	C4M982	C4M982	19	19	19	21.7298	19	19	0.272228	0.376515	-1.36491			1	0	0	1	1	0	0	1	9	9	9	27.581	0.0063012	1.1215	3478000	12	2	0	0	1	1	0	0	244	244	0	0	9	9	0	0	0	0	0	3478000
tRNA pseudouridine synthase, putative	EHI_179010	C4LUW4	C4LUW4	19	19	19	21.966	19	19	0.272228	0.376515	-1.48298			1	0	0	0	1	0	0	1	2.7	2.7	2.7	46.709	1	-2	4096500	26	2	0	0	0	1	0	0	401	401	0	0	0	2.7	0	0	0	0	0	4096500
Ribosomal protein S29, putative	EHI_030070	C4LW10	C4LW10	19	19	19	19	23.046	22.8894	0.272228	0.376515	-2.02301			1	0	0	0	0	1	1	1	17.9	17.9	17.9	6.4584	0.0019894	1.3628	16430000	4	2	0	0	0	0	1	1	56	56	0	0	0	0	17.9	17.9	0	0	0	0
PHD-type domain-containing protein	EHI_027620	C4M1U8	C4M1U8	19	19	19	24.9591	19	19	0.272228	0.376515	-2.97954			1	0	0	0	1	0	0	1	1	1	1	87.946	0.00978	0.9917	32616000	39	2	0	0	0	1	0	0	770	770	0	0	0	1	0	0	0	0	0	32616000
Protein farnesyltransferase subunit beta	EHI_006190	A0A8U0WPW2	A0A8U0WPW2	19	19	19	19	25.2467	19	0.272228	0.376515	-3.12333			1	0	0	0	0	1	0	1	2.1	2.1	2.1	42.581	0.010216	0.92103	39811000	18	1	0	0	0	0	1	0	375	375	0	0	0	0	2.1	0	0	0	0	0
4-alpha-glucanotransferase	EHI_148560	C4LT26	C4LT26	19	19	19	19	20.2101	19	0.272228	0.376515	-0.605074			1	0	0	0	0	1	0	1	1.6	1.6	1.6	103.47	0.010303	0.9524	1213000	49	1	0	0	0	0	1	0	898	898	0	0	0	0	1.6	0	0	0	0	0
Proteasome subunit alpha type	EHI_090000	C4MA29;C4M3U5	C4MA29;C4M3U5	19	19	19	21.1401	19	19	0.272228	0.376515	-1.07004			2	0	0	1	2	0	0	2	7.8	7.8	7.8	27.566	0.001385	1.6231	2311000	18	3	0	0	1	2	0	0	245	NaN	0	0	3.7	7.8	0	0	0	0	0	2311000
phenylalanine--tRNA ligase	EHI_078230	C4M538	C4M538	19	19	19	21.4705	19	21.9591	0.272228	0.376515	-1.23523			1	0	0	0	1	0	1	1	2.2	2.2	2.2	55.898	0.00071582	1.8833	6982700	30	2	0	0	0	1	0	1	493	493	0	0	0	2.2	0	2.2	0	0	0	2905700
Longin-type vesicle-associated membrane protein	EHI_137830	B1N348	B1N348	19	19	19	19	21.612	19	0.272228	0.376515	-1.30601			1	0	0	0	0	1	0	1	4.9	4.9	4.9	26.052	1	-2	3205300	9	1	0	0	0	0	1	0	226	226	0	0	0	0	4.9	0	0	0	0	0
Adaptor protein (AP) family protein	EHI_058450	C4M5F2	C4M5F2	19	19	19	19	21.9971	19	0.272228	0.376515	-1.49854			1	0	0	0	0	1	0	1	1.6	1.6	1.6	98.993	0.0097324	0.96803	4185800	52	1	0	0	0	0	1	0	874	874	0	0	0	0	1.6	0	0	0	0	0
SH3 domain-containing protein	EHI_159850	C4LX60	C4LX60	19	19	19	19	22.0563	19	0.272228	0.376515	-1.52815			1	0	0	0	0	1	0	1	2.4	2.4	2.4	38.613	1	-2	4361200	16	0	0	0	0	0	1	0	327	327	0	0	0	0	2.4	0	0	0	0	0
Uncharacterized protein	EHI_034820	C4MBG8	C4MBG8	19	19	19	22.5216	19	19	0.272228	0.376515	-1.76079			1	0	0	1	1	0	0	1	5.6	5.6	5.6	18.901	0.0097561	0.97976	6021000	8	2	0	0	1	1	0	0	161	161	0	0	5.6	5.6	0	0	0	0	0	6021000
Rap/Ran GTPase-activating protein, putative	EHI_100290	C4M0V0	C4M0V0	19	19	19	19	23.013	19	0.272228	0.376515	-2.00652			1	0	0	0	0	1	0	1	3.6	3.6	3.6	65.518	0.00071429	1.8556	8464800	26	1	0	0	0	0	1	0	562	562	0	0	0	0	3.6	0	0	0	0	0
Ubiquitin-like protein	EHI_170060	C4M1C8	C4M1C8	19	19	19	19	23.0167	22.5789	0.272228	0.376515	-2.00834			1	0	0	0	0	1	1	1	10.5	10.5	10.5	12.595	0	2.362	14751000	7	2	0	0	0	0	1	1	114	114	0	0	0	0	10.5	10.5	0	0	0	0
Protein kinase, putative	EHI_140320	C4M480	C4M480	19	19	19	23.0504	19	19	0.272228	0.376515	-2.0252			1	0	0	0	1	0	0	1	1.9	1.9	1.9	83.079	0.0026264	1.3261	8686900	47	2	0	0	0	1	0	0	731	731	0	0	0	1.9	0	0	0	0	0	8686900
Structural maintenance of chromosomes protein	EHI_050790	C4LTU9	C4LTU9	19	19	19	23.1715	19	19	0.272228	0.376515	-2.08574			2	0	0	1	1	0	0	2	1.5	1.5	1.5	140.93	0.010167	0.89582	9447400	63	3	0	0	1	1	0	0	1197	1197	0	0	0.9	0.6	0	0	0	0	0	9447400
NF-X1-type domain-containing protein	EHI_000700	C4LZB9;C4M236	C4LZB9;C4M236	19	19	19	19	23.2188	19	0.272228	0.376515	-2.10942			2	0	0	0	0	2	0	2	5.9	5.9	5.9	68.934	0	4.1269	9762600	28	1	0	0	0	0	2	0	598	NaN	0	0	0	0	5.9	0	0	0	0	0
PRA1 family protein	EHI_118140	C4LYZ8	C4LYZ8	25.6958	19	22.3448	19	19	19	0.272348	0.376515	3.34686			2	2	0	1	0	0	0	2	10.3	10.3	10.3	26.23	0	4.443	59677000	6	3	2	0	1	0	0	0	224	224	10.3	0	4.5	0	0	0	54351000	0	5326600	0
Uncharacterized protein	EHI_191730	C4MAH5	C4MAH5	24.7417	23.2863	25.0656	23.5347	23.2954	22.8281	0.274565	0.37926	0.949478			3	2	2	3	2	1	2	3	4.9	4.9	4.9	97.8	0	28.874	103290000	32	15	2	2	3	2	1	2	889	889	3.8	3.8	4.9	3.8	2.1	3.8	28054000	10230000	35116000	12152000
Rab family GTPase	EHI_168600	C4MBH0	C4MBH0	25.013	21.8798	19	19	19	19	0.277815	0.383427	2.96427			4	4	1	1	0	0	0	4	27.3	27.3	27.3	22.223	0	20.974	37718000	12	6	4	1	1	0	0	0	198	198	27.3	7.6	5.6	0	0	0	33859000	3858900	0	0
rRNA biogenesis protein RRP5, putative	EHI_077270	C4M2T6;B1N3M7;C4MAW0;B1N5N5;B1N5R2;B1N5Q4;B1N4H4;B1N5X7	C4M2T6;B1N3M7;C4MAW0;B1N5N5	24.2668	21.3361	25.0614	21.5181	21.7235	21.1966	0.278336	0.383823	1.93395			8	4	1	5	1	1	1	8	5.6	5.6	5.6	198.25	0	13.13	66717000	89	13	4	1	5	1	1	1	1710	NaN	3.1	0.9	3.3	0.9	0.9	0.9	20185000	2647400	35014000	3003300
Uncharacterized protein	EHI_042210	C4M4H5	C4M4H5	24.1402	21.3833	19	19	19	19	0.282074	0.388651	2.50783			2	2	1	0	0	0	0	2	1.2	1.2	1.2	193.88	0.0007215	1.9226	21224000	78	2	2	1	0	0	0	0	1719	1719	1.2	0.8	0	0	0	0	18489000	2735400	0	0
G domain-containing protein; AIG1-type G domain-containing protein (Fragment)	EHI_033550	C4M430;C4MBL2;B1N5A7;C4M2T8	C4M430;C4MBL2;B1N5A7;C4M2T8	27.0622	25.557	26.7	25.5691	25.7761	24.7011	0.284803	0.392082	0.767158			1	1	1	1	1	1	1	1	1.6	1.6	1.6	94.921	0.0098665	0.7607	433030000	42	17	1	1	1	1	1	1	817	NaN	1.6	1.6	1.6	1.6	1.6	1.6	140130000	49366000	109020000	49780000
Formin homology 2 domain containing protein	EHI_090250	C4M8H3	C4M8H3	22.8524	22.5818	24.4408	22.862	21.2115	19	0.28592	0.39329	1.25487			3	1	2	3	3	1	1	3	4.7	4.7	4.7	99.102	0	14.052	46674000	46	11	1	2	3	3	1	1	859	859	1.7	3.6	4.7	4.7	1.7	1.7	7572600	6277600	22772000	7623400
AP-1 complex subunit gamma	EHI_196890	C4LVA7	C4LVA7	26.6427	25.6632	26.9671	25.793	25.7458	24.7727	0.28641	0.393634	0.654903			5	2	2	2	4	3	1	5	5.9	5.9	5.9	93.565	0	10.101	432160000	29	15	2	2	2	4	3	1	837	837	2	2	2	4.7	3.6	1	104770000	53135000	131190000	58139000
Tyrosine kinase, putative	EHI_068160	C4LU09	C4LU09	26.7309	24.015	25.0615	23.3641	24.3647	22.9587	0.286765	0.393792	1.40476			8	7	3	3	1	3	1	8	5.3	5.3	5.3	241.7	0	42.367	203900000	96	15	7	3	3	1	3	1	2171	2171	4.7	2.1	2.1	0.5	1.8	0.5	111380000	16953000	35016000	10797000
ADF-H domain-containing protein	EHI_035630	C4LXZ3	C4LXZ3	25.6681	21.9411	19	19	19	19	0.288726	0.396153	3.20305			1	1	1	0	0	0	0	1	7.8	7.8	7.8	15.548	0.00075472	2.2142	57343000	7	3	1	1	0	0	0	0	141	141	7.8	7.8	0	0	0	0	53317000	4026400	0	0
Copine, putative	EHI_163260	C4MBJ7	C4MBJ7	26.3556	23.7308	25.404	22.8947	24.478	24.1656	0.290188	0.397827	1.4771			2	2	1	2	1	1	2	2	11.5	7.3	7.3	28.833	0	31.477	194170000	15	14	2	1	2	1	1	2	262	262	11.5	6.9	7.3	6.9	6.9	7.3	85868000	13921000	44397000	7797900
Actin binding protein, putative	EHI_103450	C4LVI9	C4LVI9	26.859	19	22.4036	19	19	19	0.291174	0.398845	3.75418			4	4	0	1	0	0	0	4	13.3	13.3	13.3	43.652	0	14.279	127270000	19	6	4	0	1	0	0	0	383	383	13.3	0	5	0	0	0	121720000	0	5548100	0
F-BAR domain-containing protein	EHI_105210	C4M126	C4M126	24.2415	25.1307	26.3229	24.4131	24.0523	23.0385	0.295307	0.404169	0.999016			3	1	2	3	3	3	2	3	11.1	11.1	11.1	37.758	0	29.929	188860000	24	20	1	2	3	3	3	2	333	333	3.9	6.3	11.1	11.1	11.1	6.3	19834000	36736000	83940000	22339000
Uncharacterized protein	EHI_169950	C4M1B7	C4M1B7	25.654	19	19	24.8272	24.81	19	0.297577	0.406936	-3.60058			1	1	0	0	1	1	0	1	5.5	5.5	5.5	21.208	0.0080396	1.0504	111980000	9	5	1	0	0	1	1	0	181	181	5.5	0	0	5.5	5.5	0	52799000	0	0	29766000
Protein phosphatase domain-containing protein; Protein phosphatase, putative	EHI_167620	B1N461;C4LV13	B1N461;C4LV13	23.9486	19	21.0257	19	19	19	0.298755	0.408207	2.32476			2	1	1	1	0	0	0	2	10.2	10.2	10.2	26.392	0	2.4293	18325000	16	3	1	1	1	0	0	0	236	NaN	3.8	6.4	6.4	0	0	0	16190000	0	2134800	0
Metal dependent hydrolase, putative	EHI_054690	C4M2I8	C4M2I8	26.6009	26.9263	27.2526	25.1887	26.9297	25.9514	0.299276	0.408342	0.867426			6	4	6	6	3	3	3	6	31.2	31.2	31.2	24.027	0	55.414	620170000	10	36	4	6	6	3	3	3	218	218	23.4	31.2	31.2	17	17	17	101780000	127530000	159900000	38242000
Peptidase C1A papain C-terminal domain-containing protein	EHI_127030	C4LWX8	C4LWX8	28.5398	26.8219	28.5251	27.1869	26.8713	26.1635	0.299351	0.408342	0.933178			15	11	5	13	8	7	3	15	28.2	28.2	28.2	57.953	0	101.5	1245800000	29	77	11	5	13	8	7	3	503	503	23.7	11.5	21.7	17.9	14.5	7	390240000	118630000	386280000	152780000
Biotin--acetyl-CoA-carboxylase ligase, putative	EHI_167730	C4M7Z4	C4M7Z4	23.449	23.6027	23.7138	23.5776	23.0559	23.2572	0.301473	0.410894	0.27174			2	2	2	2	2	2	1	2	10.6	10.6	10.6	27.413	0	13.373	69212000	14	9	2	2	2	2	2	1	236	236	10.6	10.6	10.6	10.6	10.6	5.9	11451000	12739000	13758000	12519000
Proteasome subunit alpha type-5	EHI_004760	Q94561	Q94561	19	19	23.6384	22.9586	23.0898	22.5126	0.302778	0.412281	-2.47802			1	0	0	1	1	1	1	1	4.5	4.5	4.5	27.247	0.010125	0.88269	36120000	15	4	0	0	1	1	1	1	247	247	0	0	4.5	4.5	4.5	4.5	0	0	13058000	8151100
4-alpha-glucanotransferase	EHI_084680	C4M1J9	C4M1J9	25.6206	19	21.6261	19	19	19	0.302992	0.412281	3.08224			4	4	0	1	0	0	0	4	5.8	5.8	5.8	97.474	0	6.3588	54827000	47	5	4	0	1	0	0	0	825	825	5.8	0	1.2	0	0	0	51590000	0	3236800	0
Uncharacterized protein; Serine/threonine-protein kinase, putative	EHI_067380	B1N4F9;C4M8B6	B1N4F9;C4M8B6	19	23.8262	19	22.7579	23.6575	19	0.304605	0.414132	-2.59899			1	0	1	0	1	1	0	1	5.4	5.4	5.4	17.686	0.01018	0.89686	35197000	9	3	0	1	0	1	1	0	149	NaN	0	5.4	0	5.4	5.4	0	0	14873000	0	7092700
Uncharacterized protein	EHI_086380	C4M8Y6	C4M8Y6	28.6511	26.2847	24.284	23.052	25.2694	19	0.306588	0.416482	2.2459			4	4	2	1	1	2	1	4	11.7	11.7	11.7	34.922	0	22.379	572850000	6	15	4	2	1	1	2	1	309	309	11.7	5.2	2.6	2.6	5.2	2.6	421540000	81748000	20427000	8696600
Uncharacterized protein; TLDc domain-containing protein	EHI_171070	B1N5N2;B1N569;C4MBB8	B1N5N2;B1N569;C4MBB8	23.2321	23.1657	22.1325	19	22.9247	22.392	0.307362	0.417189	1.88106			2	1	2	1	0	2	2	2	14.3	14.3	14.3	22.09	0	9.3402	37326000	11	8	1	2	1	0	2	2	182	NaN	7.7	14.3	7.7	0	14.3	14.3	9852800	9409800	4597600	0
Iron-sulfur flavoprotein, putative	EHI_134740	C4M023	C4M023	21.5821	19	25.8453	19	19	19	0.309752	0.420085	3.14247			2	1	0	2	0	0	0	2	12.4	12.4	12.4	21.746	0	2.3351	63426000	10	4	1	0	2	0	0	0	194	194	7.7	0	12.4	0	0	0	3139400	0	60287000	0
Vps53 N-terminal domain-containing protein	EHI_188090	C4M183	C4M183	19	21.2176	24.9288	19	19	19	0.310877	0.421263	2.71546			3	0	1	2	0	0	0	3	3.1	3.1	3.1	108.08	0.00076394	2.2859	34377000	47	3	0	1	2	0	0	0	948	948	0	1.5	1.6	0	0	0	0	2438600	31938000	0
Methionine gamma-lyase	EHI_142250	A0A8U0WPT3;B1N417;C4MAS9	A0A8U0WPT3	23.74	20.9081	24.9982	24.9059	25.3328	24.605	0.311915	0.422321	-1.90392			6	2	1	5	4	5	3	6	20.2	20.2	20.2	42.812	0	22.888	148700000	14	22	2	1	5	4	5	3	392	NaN	8.2	4.1	18.4	13.3	16.1	9.2	14010000	1967700	33513000	31436000
SH3 domain-containing protein	EHI_130920	C4LXG0	C4LXG0	24.5301	21.0364	19	19	19	19	0.312964	0.423097	2.52216			4	3	1	1	0	0	0	4	1.8	1.8	1.8	279.79	0	3.5394	26377000	92	8	3	1	1	0	0	0	2401	2401	1.5	0.5	0.3	0	0	0	24226000	2150800	0	0
Single tm domain protein	EHI_080590	C4M9N8	C4M9N8	25.7501	21.485	19	19	19	19	0.313004	0.423097	3.07836			4	3	3	0	0	0	0	4	46.7	46.7	46.7	12.098	0	37.501	59370000	6	7	3	3	0	0	0	0	107	107	29	46.7	0	0	0	0	56435000	2935100	0	0
Vacuolar sorting protein 26, putative	EHI_127180	C4LWZ1	C4LWZ1	19	21.2288	25.1399	19	19	19	0.314877	0.425135	2.78957			3	0	2	2	0	0	0	3	10	10	10	35.56	0	2.7668	39429000	17	4	0	2	2	0	0	0	310	310	0	7.4	6.1	0	0	0	0	2457600	36971000	0
p-glycoprotein-5	EHI_175450	C4M3B2;B1N521;C4M9Z7	C4M3B2	24.9299	19	23.5094	19	20.2856	19	0.31503	0.425135	2.83699			4	3	0	1	0	1	0	4	4.4	4.4	4.4	144.99	0	75.493	45182000	61	8	3	0	1	0	1	0	1296	NaN	2.5	0	1.9	0	0.7	0	31963000	0	11941000	0
WD repeat protein	EHI_099190	C4M6B2;C4M926	C4M6B2;C4M926	27.6883	26.5208	27.5638	26.4726	26.855	25.5255	0.31936	0.430625	0.593836			6	5	4	4	3	4	3	6	24.4	24.4	24.4	36.65	0	66.068	773760000	15	63	5	4	4	3	4	3	332	NaN	20.2	16.6	16.9	12.3	16.9	12.3	216280000	96283000	198390000	93122000
Dipeptidyl-peptidase, putative	EHI_136440	A0A8U0WPM9;B1N629;B1N5R5	A0A8U0WPM9;B1N629	26.7159	24.9039	26.75	25.232	25.1407	23.773	0.319958	0.431076	0.9369			8	6	3	7	2	2	1	8	10.8	10.8	10.8	76.529	0	20.735	345220000	23	26	6	3	7	2	2	1	665	NaN	10.1	4.5	10.8	2.7	2.7	1.4	110230000	31392000	112860000	39409000
Profilin	EHI_109900	C4M3K9	C4M3K9	24.2971	22.9761	24.1389	22.5837	23.51	19	0.321332	0.432572	0.757148			1	1	1	1	1	1	0	1	6.2	6.2	6.2	14.377	0.0056962	1.1388	65569000	9	5	1	1	1	1	1	0	129	129	6.2	6.2	6.2	6.2	6.2	0	20613000	8250900	18473000	6286100
proton-translocating NAD(P)(+) transhydrogenase	EHI_055400	B1N4I3	B1N4I3	25.5263	21.2462	19	19	19	19	0.321928	0.433019	2.92416			4	3	1	0	0	0	0	4	38.6	4.5	4.5	119.09	0	6.3016	50813000	47	3	3	1	0	0	0	0	1098	1098	32.6	24.5	24.3	9.7	6.3	6.3	48325000	2487400	0	0
Uncharacterized protein	EHI_113950	C4M8W1	C4M8W1	19	26.1706	21.3835	19	19	19	0.326488	0.438793	3.1847			2	1	2	1	0	0	0	2	24.2	24.2	24.2	35.757	0	3.974	78269000	8	4	1	2	1	0	0	0	310	310	21	24.2	21	0	0	0	0	75534000	2735700	0
Alpha-amylase family protein	EHI_023360	C4LUP7	C4LUP7	19	21.1037	25.3608	19	19	19	0.327144	0.438974	2.82151			2	0	1	1	0	0	0	2	4	4	4	56.689	0	7.113	45344000	24	2	0	1	1	0	0	0	496	496	0	2	2	0	0	0	0	2253400	43090000	0
Uncharacterized protein	EHI_097870	C4M487	C4M487	27.7231	26.4	27.8386	26.3727	26.8225	26.2719	0.327157	0.438974	0.722964			4	2	2	4	1	2	2	4	18.9	18.9	18.9	25.437	0	12.533	836740000	12	22	2	2	4	1	2	2	222	222	11.7	8.6	18.9	5.4	8.6	8.6	221560000	88550000	240030000	86893000
Protein kinase domain containing protein	EHI_081790	C4M695	C4M695	24.4105	22.1791	24.3372	22.904	22.061	19	0.328318	0.440171	1.15979			1	1	1	1	1	1	0	1	1.8	1.8	1.8	132.79	0	21.339	60468000	57	7	1	1	1	1	1	0	1183	1183	1.8	1.8	1.8	1.8	1.8	0	22300000	4748700	21195000	7848500
Translation initiation factor, putative	EHI_179390	C4M9X9	C4M9X9	22.5303	22.1174	23.5543	23.4862	23.2654	19	0.333075	0.446184	-0.641798			1	1	1	1	1	1	0	1	20	20	20	12.359	0	42.431	44759000	7	10	1	1	1	1	1	0	110	110	20	20	20	20	20	0	6057700	4549800	12318000	11750000
40S ribosomal protein S7	EHI_067530	C4M9F9;B1N3K9	C4M9F9;B1N3K9	29.7846	27.7185	28.8371	26.8781	28.4618	26.808	0.335841	0.449395	1.11011			8	6	4	7	3	5	3	7	24.4	24.4	24.4	21.955	0	12.591	2235700000	11	50	5	4	7	3	4	3	201	NaN	22.9	18.9	24.4	13.9	22.4	13.9	924800000	220850000	479550016	123340000
Hydroxylamine reductase, putative	EHI_004600	A0A8U0WP49	A0A8U0WP49	29.2482	27.7234	29.1727	27.278	28.4021	27.7739	0.336019	0.449395	0.874751			12	12	8	11	6	8	8	12	24.7	24.7	24.7	60.322	0	72.302	2211400000	30	80	12	8	11	6	8	8	539	539	24.7	17.4	23.4	12.2	15.2	16	637660032	221610000	605160000	162740000
C2 NT-type domain-containing protein	EHI_079990	C4M2L9	C4M2L9	21.7613	19	21.4818	19.8466	19	19	0.342051	0.457089	1.32442			1	1	0	1	1	0	0	1	2	2	2	70.024	0.00071736	1.8971	7426200	31	3	1	0	1	1	0	0	611	611	2	0	2	2	0	0	3554700	0	2928700	942790
NadR/Ttd14 AAA domain-containing protein	EHI_095850	C4M3E2	C4M3E2	24.6135	25.47	27.1691	24.9553	24.3053	24.5971	0.343804	0.459058	1.12059			5	2	3	5	4	3	3	1	29.2	29.2	7.5	27.328	0	36.447	301690000	13	29	1	1	1	1	1	1	240	240	12.1	16.7	29.2	22.5	16.7	16.7	25669000	46475000	150910000	32530000
glycine--tRNA ligase	EHI_073460	C4LXL0	C4LXL0	26.0042	24.9839	26.4197	24.5956	25.5483	25.1871	0.346082	0.461725	0.730653			6	5	3	5	2	2	3	6	13.1	13.1	13.1	70.658	0	28.756	302870000	36	25	5	3	5	2	2	3	627	627	11.6	6.1	10	4.1	4.1	6.1	67305000	33181000	89766000	25352000
Uncharacterized protein	EHI_081710	C4M698	C4M698	23.7731	22.7335	23.8337	22.8535	23.024	22.4301	0.354798	0.472968	0.508026			2	1	1	2	1	1	1	2	8.2	8.2	8.2	36.657	0	3.2043	58019000	10	7	1	1	2	1	1	1	318	318	3.8	3.8	8.2	3.8	3.8	3.8	14336000	6973500	14951000	7578800
60S ribosomal protein L30, putative	EHI_065740	C4LZZ0;C4M919	C4LZZ0	25.7733	25.6929	26.7817	24.1013	26.1437	25.1491	0.357536	0.47623	0.96015			3	2	1	2	1	2	1	3	22	22	22	11.594	0	30.313	356300000	5	18	2	1	2	1	2	1	109	NaN	22	11.9	22	11.9	20.2	11.9	57350000	54240000	115370000	17997000
Serine protease inhibitor, putative	EHI_119330	C4M4Y1	C4M4Y1	28.248	27.4037	27.362	27.3063	27.2302	26.5419	0.359862	0.47894	0.40296			14	9	8	7	9	9	7	14	34.8	34.8	34.8	42.596	0	50.715	1090000000	24	67	9	8	7	9	9	7	371	371	24	19.1	21.3	25.3	22.6	20.2	318780000	177560000	172500000	165970000
ADP-ribosylation factor	EHI_073470	C4LXL1	C4LXL1	30.3846	29.0182	30.5484	29.5635	28.9741	28.0446	0.360286	0.479116	0.714908			9	7	7	8	7	6	6	9	56.3	56.3	56.3	19.892	0	109.55	5113300000	10	152	7	7	8	7	6	6	174	174	49.4	49.4	55.2	49.4	43.7	36.2	1401799936	543670016	1570300032	793420032
Protein kinase domain containing protein	EHI_119930	C4M987	C4M987	23.2267	26.2259	27.5866	25.8526	19	26.4741	0.363978	0.48351	3.2534			2	2	2	2	1	0	1	2	2.2	2.2	2.2	78.105	0	2.8545	443660000	45	12	2	2	2	1	0	1	671	671	2.2	2.2	2.2	1	0	1	9815700	78483000	201550000	60591000
Eukaryotic translation initiation factor 5B	EHI_127340	C4LX06	C4LX06	23.7532	22.7863	24.0398	23.9667	19	19	0.36418	0.48351	2.04307			2	1	2	2	1	0	0	2	3	3	3	102.38	0	11.738	55013000	38	11	1	2	2	1	0	0	890	890	1.7	3	3	1.7	0	0	14139000	7233500	17246000	16394000
60S ribosomal protein L5, putative	EHI_006860	C4LU56	C4LU56	25.4984	24.7262	25.6638	25.0603	24.7066	22.7243	0.37356	0.495563	0.412663			4	4	2	4	2	2	1	4	19.2	19.2	19.2	32.376	0	22.572	197610000	12	20	4	2	4	2	2	1	286	286	19.2	7.7	19.2	7.7	9.8	4.5	47399000	27754000	53158000	34986000
Syntaxin, putative	EHI_139030	A0A8U0WNX3	A0A8U0WNX3	24.8753	23.8867	19	21.136	19	19	0.383855	0.508528	2.51935			2	2	2	1	1	1	0	2	8.2	8.2	8.2	34.52	0	14.385	48591000	22	7	2	2	1	1	1	0	304	304	8.2	8.2	3.9	4.3	4.3	0	30776000	15510000	0	2304400
Enhancer binding protein-1	EHI_121780	C4M5C4	C4M5C4	22.5236	22.0012	24.6597	25.151	23.4621	21.1114	0.383952	0.508528	-1.24509			5	1	1	3	4	2	2	5	18	18	18	35.285	0	8.3735	87810000	17	16	1	1	3	4	2	2	306	306	3.3	3.3	10.5	14.7	8.2	8.2	6029600	4197900	26503000	37258000
Chorein N-terminal domain-containing protein	EHI_013860	C4LXM9	C4LXM9	22.3926	22.5219	24.1369	21.8003	22.6345	21.5443	0.385049	0.509569	0.799739			2	1	1	1	1	1	1	2	2.7	2.7	2.7	101.11	0	4.3784	43197000	51	6	1	1	1	1	1	1	874	874	1.4	1.4	1.4	1.4	1.4	1.4	5506200	6022200	18447000	3652000
40S ribosomal protein S20, putative	EHI_026410	C4M5V7	C4M5V7	25.1675	24.3931	24.918	24.5884	24.476	23.3539	0.395965	0.523592	0.294044			1	1	1	1	1	1	1	1	16.9	8.5	8.5	13.234	0	2.3662	150700000	6	7	1	1	1	1	1	1	118	118	16.9	16.9	8.5	8.5	8.5	8.5	37686000	22032000	31701000	25225000
Phosphatidylinositol-4,5-bisphosphate 3-kinase, putative	EHI_009890	C4M0Q4	C4M0Q4	27.8138	26.6564	28.6807	26.8799	27.0601	26.2972	0.398167	0.52608	0.746945			2	2	1	1	1	1	1	2	2.6	2.6	2.6	119.9	0.0097442	0.97637	1117900000	58	19	2	1	1	1	1	1	1044	1044	2.6	0.9	0.9	0.9	0.9	0.9	235940000	105770000	430289984	123500000
Endoribonuclease L-PSP, putative	EHI_087570	C4LXT9	C4LXT9	26.207	27.1142	29.4226	29.2911	28.3737	27.7505	0.401126	0.529563	-1.25117			8	2	4	8	6	4	4	8	45.7	45.7	45.7	13.382	0	41.776	2172900000	8	74	2	4	8	6	4	4	127	127	17.3	32.3	45.7	43.3	32.3	32.3	77461000	145270000	719609984	656910016
Uncharacterized protein	EHI_044520	C4LT74	C4LT74	19	19	23.3939	22.2873	22.3196	19	0.402542	0.531006	-1.83881			1	1	0	1	1	1	0	1	2.8	2.8	2.8	49.102	0	2.3595	21375000	28	4	1	0	1	1	1	0	428	428	2.8	0	2.8	2.8	2.8	0	0	0	11022000	5118600
Alcohol dehydrogenase, putative	EHI_166490	C4M7F5	C4M7F5	25.3258	24.4733	25.1945	25.21	25.4717	24.1143	0.406108	0.53528	-0.343005			3	2	2	2	3	2	2	3	5.7	5.7	5.7	46.614	0	18.13	207250000	20	18	2	2	2	3	2	2	419	419	5.7	5.7	5.7	5.7	5.7	5.7	42057000	23291000	38396000	38812000
PH domain containing protein	EHI_192960	B1N4D4	B1N4D4	24.4427	25.2842	26.13	24.963	24.3101	21.2444	0.406741	0.535683	0.649084			8	3	5	5	3	2	1	8	16.7	16.7	16.7	64.397	0	29.111	193090000	30	26	3	5	5	3	2	1	574	574	9.2	8.7	9.2	4.5	3.3	1.2	22802000	40861000	73437000	32705000
N-acetylmuraminidase	EHI_014400	C4LXS4	C4LXS4	26.7272	25.6478	27.1934	26.2827	25.5045	23.7957	0.409673	0.538685	0.629174			5	5	3	4	3	2	2	5	29	29	29	24.46	0	124.71	460930000	15	49	5	3	4	3	2	2	210	210	29	17.1	21	17.1	12.9	12.9	111090000	52572000	153470000	81635000
Guanine nucleotide-binding protein subunit beta 2-like 1, putative	EHI_110400	C4LU92;C4LTS8	C4LU92;C4LTS8	25.7922	23.2912	24.4016	23.044	24.0351	23.4302	0.411633	0.538685	0.955457			3	3	1	2	1	2	2	3	10.6	10.6	10.6	34.988	0	15.112	127670000	13	13	3	1	2	1	2	2	321	NaN	10.6	5	8.4	5	7.2	7.2	58105000	10265000	22162000	8648400
Vacuolar protein sorting-associated protein 29	EHI_025270	A0A8U0WPU6	A0A8U0WPU6	24.5967	22.6389	24.3645	23.156	23.0802	19	0.417263	0.538685	0.748619			2	2	1	2	1	1	0	2	15.7	15.7	15.7	20.781	0	11.702	71717000	8	7	2	1	2	1	1	0	185	185	15.7	7	15.7	8.6	8.6	0	25372000	6531100	21599000	9346500
Inositol polyphosphate 5-phosphatase, putative	EHI_159880	C4LX62	C4LX62	22.7731	19	22.8678	19	20.7954	19	0.421429	0.538685	1.64924			3	1	0	2	1	1	0	3	5.2	5.2	5.2	79.378	0	3.1573	16642000	34	5	1	0	2	1	1	0	676	676	1.6	0	3.7	2.1	1.5	0	7167800	0	7653900	0
Coronin	EHI_083590	C4M943;C4M137	C4M943	26.619	24.6487	19	19	22.0931	21.8983	0.430511	0.538685	2.87604			4	4	4	0	0	1	1	4	12.7	12.7	12.7	48.09	0	10.197	137760000	22	12	4	4	0	0	1	1	433	NaN	12.7	12.7	0	0	2.3	2.3	103070000	26303000	0	0
TFIIB-type domain-containing protein	EHI_050980	C4LTW8	C4LTW8	22.532	19	23.7399	21.017	19	19	0.442937	0.538685	1.7488			3	1	0	3	1	0	0	3	10.2	10.2	10.2	32.636	0.0038412	1.1888	22196000	19	3	1	0	3	1	0	0	284	284	3.2	0	10.2	3.9	0	0	6064800	0	14009000	2122000
Rap/Ran GTPase activating protein, putative	EHI_108700	C4M834	C4M834	23.8006	21.6555	21.7962	23.2343	23.1665	22.1563	0.445911	0.538685	-0.783009			2	1	1	1	1	1	1	2	3.9	3.9	3.9	91.505	0	7.2462	45513000	44	9	1	1	1	1	1	1	796	796	2	2	2	1.9	1.9	1.9	14611000	3303300	3641700	9868000
Uncharacterized protein	EHI_155560	C4LWA7	C4LWA7	25.4379	24.1578	24.7662	24.1736	24.544	23.3491	0.451869	0.538685	0.428482			3	2	2	2	2	3	1	3	13.3	13.3	13.3	35.757	0	7.9208	146780000	9	14	2	2	2	2	3	1	315	315	7.3	7.3	7.3	8.3	13.3	2.2	45455000	18717000	28534000	18923000
40S ribosomal protein S4, putative	EHI_003940	C4LYF4;B1N336;B1N418	C4LYF4;B1N336;B1N418	23.5899	24.2453	25.4787	25.7419	24.5595	23.9875	0.458392	0.538685	-0.712714			5	2	2	4	3	2	1	5	15	15	15	36.751	0	18.219	176750000	17	18	2	2	4	3	2	1	326	NaN	6.7	6.7	12.6	8.3	5.8	3.7	12626000	19887000	46759000	56117000
F-BAR domain-containing protein	EHI_065490	B1N368	B1N368	19	19	23.4864	22.3556	21.8909	19	0.462685	0.538685	-1.62781			2	0	0	2	1	1	0	2	7.1	7.1	7.1	43.349	0	23.878	21007000	19	4	0	0	2	1	1	0	378	378	0	0	7.1	2.6	2.6	0	0	0	11752000	5366800
PIWI, putative	EHI_125650	C4LVV2	C4LVV2	26.4009	26.6589	28.0595	27.8254	27.3921	26.2839	0.466799	0.538685	-0.569019			5	3	3	3	4	2	2	5	5.8	5.8	5.8	109.7	0	90.253	969970000	50	40	3	3	3	4	2	2	937	937	4.5	4.8	4.8	4.9	3.3	3.3	88605000	105960000	279729984	237840000
Tetraspanin family protein	EHI_091490	C4M9D7	C4M9D7	27.3476	25.8103	25.7915	25.4728	26.0058	24.6239	0.466964	0.538685	0.577197			3	3	3	3	3	3	2	3	18.7	18.7	18.7	24.812	0	19.435	427510000	7	27	3	3	3	3	3	2	225	225	18.7	18.7	18.7	18.7	18.7	13.8	170790000	58842000	58079000	46568000
Aminopeptidase, putative	EHI_021340	C4M049	C4M049	22.7659	23.1342	24.6291	24.6971	23.6696	24.9751	0.476063	0.538685	-0.673609			3	1	1	2	2	1	3	3	7.1	7.1	7.1	48.685	0	8.9122	115810000	26	10	1	1	2	2	1	3	435	435	2.1	2.3	4.4	4.4	2.1	7.1	7131900	9206500	25948000	27200000
Cortexillin, putative; Calponin-homology (CH) domain-containing protein	EHI_104560	B1N341;B1N422	B1N341;B1N422	25.1232	25.8893	26.7759	25.7066	25.0892	26.0642	0.478289	0.538685	0.531586			9	4	3	6	4	4	4	9	17.9	17.9	17.9	65.089	0	29.081	374230000	34	32	4	3	6	4	4	4	560	NaN	9.6	7	12.5	7.3	7.3	7	36546000	62151000	114910000	54759000
D-glycerate dehydrogenase, putative	EHI_134030	A0A8U0WPL6	A0A8U0WPL6	26.6037	19	24.5287	19	22.5701	19	0.479355	0.538685	2.5924			4	4	0	2	0	1	0	4	17.9	17.9	17.9	35.864	0	20.632	132410000	18	6	4	0	2	0	1	0	318	318	17.9	0	11.3	0	3.5	0	101980000	0	24203000	0
Ikappab kinase complex-associated protein	EHI_151220	C4LSG5	C4LSG5	24.7085	21.7423	23.8586	21.2521	23.3964	23.0867	0.482397	0.538685	1.11224			5	3	1	3	1	1	2	5	8.2	8.2	8.2	87.348	0	10.77	68581000	32	13	3	1	3	1	1	2	759	759	4.5	2	5.7	2	2	2.9	27416000	3508200	15211000	2497600
TolA-like protein, putative	EHI_052780	C4M3R7	C4M3R7	23.2405	23.3266	26.0283	23.5373	22.9508	20.9407	0.485059	0.538685	0.954424			6	2	1	5	2	2	1	6	26.8	18.8	18.8	38.124	0	11.21	111160000	20	14	2	1	5	2	2	1	340	340	7.6	8.5	26.8	13.2	10.3	5.3	9910300	10520000	68436000	12174000
Uncharacterized protein	EHI_000530	C4LZA4	C4LZA4	24.5315	19	23.8207	21.9532	19	19	0.48716	0.538685	1.97417			3	3	0	2	1	0	0	3	5.9	5.9	5.9	69.045	0	7.0091	43128000	27	6	3	0	2	1	0	0	607	607	5.9	0	4.1	2.5	0	0	24251000	0	14817000	4060400
ADP-ribosylation factor, putative	EHI_107150	A0A8U0WPC2	A0A8U0WPC2	23.5129	21.4132	19	20.791	19	19	0.492037	0.538685	1.41321			2	1	1	0	1	0	0	2	12.8	12.8	12.8	21.242	0.01021	0.91025	16577000	10	3	1	1	0	1	0	0	187	187	5.9	5.9	0	7	0	0	11970000	2792600	0	1814300
Cysteine desulfurase, putative	EHI_136380	A0A8U0WPM8	A0A8U0WPM8	23.704	22.6165	24.7193	23.2774	22.8344	22.0591	0.492738	0.538685	0.624054			4	2	1	3	1	1	1	4	13.6	13.6	13.6	42.808	0	13.17	69734000	16	15	2	1	3	1	1	1	390	390	6.7	2.6	9.5	2.6	2.6	2.6	13665000	6430700	27622000	10167000
Helicase, putative	EHI_044890	C4LTA8	C4LTA8	19	19	30.7364	19	19	19	0.495025	0.538685	3.91214			1	0	0	1	0	0	0	1	0.8	0.8	0.8	111.79	1	-2	1788900000	46	1	0	0	1	0	0	0	955	955	0	0	0.8	0	0	0	0	0	1788899968	0
VPS9 domain-containing protein	EHI_050380	C4LTR3	C4LTR3	28.0782	19	19	19	19	23.9684	0.495025	0.538685	3.02607			1	1	0	0	0	0	1	1	1.8	1.8	1.8	60.399	0.010266	0.94022	299800000	27	2	1	0	0	0	0	1	510	510	1.8	0	0	0	0	1.8	283390016	0	0	0
J domain-containing protein; 26S proteasome non-ATPase regulatory subunit 5	EHI_200560	C4M3X2;C4M4G2	C4M3X2;C4M4G2	26.8504	19	19	19	19	22.2131	0.495025	0.538685	2.61681			8	8	1	0	0	0	1	8	8.9	4.4	4.4	232.36	0	42.879	125860000	112	11	8	1	0	0	0	1	2044	NaN	8.3	2.6	1.4	0.4	1	0.9	121000000	0	0	0
very-long-chain (3R)-3-hydroxyacyl-CoA dehydratase	EHI_110570	C4LUA6	C4LUA6	26.4226	19	19	19	19	19	0.495025	0.538685	2.47421			2	2	0	0	0	0	0	2	10.6	10.6	10.6	25.068	0.0013957	1.704	89950000	9	3	2	0	0	0	0	0	218	218	10.6	0	0	0	0	0	89950000	0	0	0
Protein TEX261	EHI_000800	C4LZC9	C4LZC9	26.3941	19	19	19	19	19	0.495025	0.538685	2.46471			2	2	0	0	0	0	0	2	8.8	8.8	8.8	22	0	2.4906	88192000	4	2	2	0	0	0	0	0	194	194	8.8	0	0	0	0	0	88192000	0	0	0
Uncharacterized protein	EHI_169900	C4M1B3	C4M1B3	26.3664	19	19	19	19	19	0.495025	0.538685	2.45546			1	1	0	0	0	0	0	1	5.2	5.2	5.2	21.442	0	3.8989	86511000	2	1	1	0	0	0	0	0	191	191	5.2	0	0	0	0	0	86511000	0	0	0
Peptidyl-prolyl cis-trans isomerase	EHI_128100	C4M525	C4M525	26.2145	19	19	19	19	19	0.495025	0.538685	2.40482			1	1	0	0	0	1	1	1	4.1	4.1	4.1	21.226	0.0006993	1.709	77865000	12	7	1	0	0	0	1	1	194	194	4.1	0	0	0	4.1	4.1	77865000	0	0	0
Aldehyde-alcohol dehydrogenase; Aldehyde-alcohol dehydrogenase 2, putative	EHI_150490	C4M230;B1N387	C4M230;B1N387	25.9145	19	19	19	19	19	0.495025	0.538685	2.30485			1	1	0	0	0	0	0	1	33.6	3	3	95.573	0	14.556	63249000	42	4	1	0	0	0	0	0	870	NaN	31.1	20.9	21.8	13.8	13.8	9.9	63249000	0	0	0
WD domain containing protein	EHI_148480	C4LT18	C4LT18	25.5865	19	19	19	19	19	0.495025	0.538685	2.19551			3	3	0	0	0	0	0	3	8.9	8.9	8.9	41.395	0	6.6453	50386000	19	5	3	0	0	0	0	0	370	370	8.9	0	0	0	0	0	50386000	0	0	0
Uncharacterized protein	EHI_081360	C4M5A4	C4M5A4	25.5863	19	19	19	19	19	0.495025	0.538685	2.19542			1	1	1	0	0	0	0	1	3.1	3.1	3.1	41.228	0.0026333	1.3379	50377000	9	2	1	1	0	0	0	0	351	351	3.1	3.1	0	0	0	0	50377000	0	0	0
SH3 domain-containing protein	EHI_188580	C4M8B9	C4M8B9	25.4856	19	19	19	19	19	0.495025	0.538685	2.16188			4	4	1	1	0	0	0	4	2.2	2.2	2.2	253.18	0	6.4843	46983000	86	6	4	1	1	0	0	0	2166	2166	2.2	0.6	0.6	0	0	0	46983000	0	0	0
ER membrane protein complex subunit 4	EHI_012430	B1N2I5;C4MBJ2	B1N2I5;C4MBJ2	25.4729	19	19	19	19	19	0.495025	0.538685	2.15763			1	1	0	0	0	0	0	1	8.7	8.7	8.7	14.169	0.00072993	2.0092	46570000	5	2	1	0	0	0	0	0	127	NaN	8.7	0	0	0	0	0	46570000	0	0	0
Uncharacterized protein	EHI_163590	C4M3U0	C4M3U0	25.4071	19	19	19	19	19	0.495025	0.538685	2.13569			3	3	0	0	0	0	0	3	7.4	7.4	7.4	41.262	0.0038961	1.2749	44493000	20	3	3	0	0	0	0	0	351	351	7.4	0	0	0	0	0	44493000	0	0	0
Uncharacterized protein	EHI_149730	C4M9D3	C4M9D3	25.3411	19	19	19	19	19	0.495025	0.538685	2.11371			2	2	0	0	0	0	0	2	4.5	4.5	4.5	46.187	0.010137	0.88421	42505000	23	2	2	0	0	0	0	0	400	400	4.5	0	0	0	0	0	42505000	0	0	0
Glycerophosphocholine acyltransferase 1	EHI_153380	C4LSC9	C4LSC9	25.2574	19	19	19	19	19	0.495025	0.538685	2.08581			2	2	0	0	0	0	0	2	4.8	4.8	4.8	39.741	0.010006	0.82196	40109000	11	2	2	0	0	0	0	0	333	333	4.8	0	0	0	0	0	40109000	0	0	0
SNARE associated Golgi protein	EHI_167040	C4LYA6	C4LYA6	25.1704	19	19	19	19	19	0.495025	0.538685	2.05681			2	2	0	0	0	0	0	2	6.1	6.1	6.1	29.15	0.0038486	1.2001	37762000	8	3	2	0	0	0	0	0	264	264	6.1	0	0	0	0	0	37762000	0	0	0
Protein kinase, putative	EHI_185130	B1N4V9	B1N4V9	25.1409	19	19	19	19	19	0.495025	0.538685	2.04696			1	1	0	0	0	0	0	1	2.5	2.5	2.5	41.877	1	-2	36996000	21	0	1	0	0	0	0	0	359	359	2.5	0	0	0	0	0	36996000	0	0	0
Bax inhibitor, putative	EHI_169290	C4M246	C4M246	25.1127	19	19	19	19	19	0.495025	0.538685	2.03756			1	1	0	0	0	0	0	1	3.3	3.3	3.3	23.346	1	-2	36280000	2	1	1	0	0	0	0	0	213	213	3.3	0	0	0	0	0	36280000	0	0	0
UDP-N-acetylglucosamine--dolichyl-phosphate N-acetylglucosaminephosphotransferase	EHI_062840	C4M1Q8	C4M1Q8	24.9988	19	19	19	19	19	0.495025	0.538685	1.99959			1	1	0	0	0	0	0	1	2.5	2.5	2.5	41.108	0.00073314	2.0302	33526000	6	2	1	0	0	0	0	0	365	365	2.5	0	0	0	0	0	33526000	0	0	0
Inosine-uridine preferring nucleoside hydrolase, putative	EHI_199960	C4M7L1	C4M7L1	24.9199	19	19	19	19	19	0.495025	0.538685	1.9733			1	1	0	0	0	0	0	1	5.7	5.7	5.7	35.305	0	10.975	31742000	15	1	1	0	0	0	0	0	318	318	5.7	0	0	0	0	0	31742000	0	0	0
ATP-binding cassette protein, putative	EHI_134470	C4M007	C4M007	24.7699	19	19	19	19	19	0.495025	0.538685	1.92329			1	1	0	0	0	0	0	1	4.1	0.5	0.5	148.73	0.0099532	0.7937	28607000	58	1	1	0	0	0	0	0	1314	1314	3.4	2.5	1.8	0	0.8	0	28607000	0	0	0
SNARE associated Golgi protein	EHI_169620	C4M8U3	C4M8U3	24.6806	19	19	19	19	19	0.495025	0.538685	1.89354			1	1	0	0	0	0	0	1	3.8	3.8	3.8	24.219	0.010192	0.90156	26891000	9	2	1	0	0	0	0	0	210	210	3.8	0	0	0	0	0	26891000	0	0	0
ER membrane protein complex subunit 2	EHI_153660	C4LSE8	C4LSE8	24.6484	19	19	19	19	19	0.495025	0.538685	1.8828			2	2	0	0	0	0	0	2	16.2	16.2	16.2	20.722	0	10.926	26297000	7	2	2	0	0	0	0	0	179	179	16.2	0	0	0	0	0	26297000	0	0	0
GPI-anchored wall transfer protein	EHI_031230	C4M4K5	C4M4K5	24.5615	19	19	19	19	19	0.495025	0.538685	1.85384			2	2	0	0	0	0	0	2	3.5	3.5	3.5	56.003	0.0013423	1.433	24760000	13	2	2	0	0	0	0	0	486	486	3.5	0	0	0	0	0	24760000	0	0	0
Rho-GAP domain-containing protein	EHI_099220	C4M6B5	C4M6B5	19	19	24.5445	19	19	19	0.495025	0.538685	1.84815			3	0	0	3	0	0	0	3	5.7	5.7	5.7	63.706	0	4.5742	24469000	33	3	0	0	3	0	0	0	543	543	0	0	5.7	0	0	0	0	0	24469000	0
Protein with RhoGEF and ArfGAP domains	EHI_194630	C4LZX4	C4LZX4	19	24.5232	19	19	19	19	0.495025	0.538685	1.84106			2	1	1	0	0	0	0	2	1.9	1.9	1.9	115.51	0.01	0.81894	24111000	54	2	1	1	0	0	0	0	997	997	1.2	0.7	0	0	0	0	0	24111000	0	0
AIG1 family protein	EHI_176580	C4MB73	C4MB73	24.366	19	19	19	19	19	0.495025	0.538685	1.78867			1	1	0	0	0	0	0	1	9.2	2.6	2.6	35.48	0.0013879	1.665	21622000	19	1	1	0	0	0	0	0	304	304	9.2	3	0	0	0	0	21622000	0	0	0
Tetraspanin family protein	EHI_055360	C4M9Q1	C4M9Q1	24.3658	19	19	19	19	19	0.495025	0.538685	1.7886			2	2	0	0	0	0	0	2	14	14	14	25.444	0	4.9912	21619000	5	2	2	0	0	0	0	0	222	222	14	0	0	0	0	0	21619000	0	0	0
Rho family GTPase	EHI_144600	C4MAS8	C4MAS8	24.344	19	19	19	19	19	0.495025	0.538685	1.78134			1	1	0	0	0	0	0	1	10	4.5	4.5	22.675	0.010284	0.94906	21295000	10	1	1	0	0	0	0	0	200	200	10	5.5	5.5	0	0	0	21295000	0	0	0
Transporter, major facilitator family	EHI_110390	C4LU91	C4LU91	24.2743	19	19	19	19	19	0.495025	0.538685	1.75809			2	2	0	0	0	0	0	2	7.5	7.5	7.5	59.578	0	4.3524	20290000	4	3	2	0	0	0	0	0	530	530	7.5	0	0	0	0	0	20290000	0	0	0
Sphingomyelin synthase-like domain-containing protein	EHI_125970	C4LVY2	C4LVY2	24.2547	19	19	19	19	19	0.495025	0.538685	1.75157			1	1	0	0	0	0	0	1	9.1	9.1	9.1	17.009	0.0026212	1.3176	20017000	8	1	1	0	0	0	0	0	143	143	9.1	0	0	0	0	0	20017000	0	0	0
Variant sh3 domain containing protein	EHI_054800	C4M2J9	C4M2J9	24.2407	19	19	19	19	19	0.495025	0.538685	1.74689			2	2	0	0	0	0	0	2	4.9	4.9	4.9	54.843	0.0013477	1.4548	19823000	19	2	2	0	0	0	0	0	471	471	4.9	0	0	0	0	0	19823000	0	0	0
Serine-rich 25 kDa antigen protein	SREHP	P21138	P21138	24.1975	19	19	19	19	19	0.495025	0.538685	1.73249			1	1	0	0	0	0	0	1	6.9	6.9	6.9	24.719	0	3.2457	19238000	17	2	1	0	0	0	0	0	233	233	6.9	0	0	0	0	0	19238000	0	0	0
Sec 13 protein, putative	EHI_001050	A0A8U0WPV8	A0A8U0WPV8	24.1312	19	19	19	19	19	0.495025	0.538685	1.71041			2	2	0	0	0	0	0	2	10.7	10.7	10.7	29.492	0.00072516	1.9478	18375000	15	2	2	0	0	0	0	0	261	261	10.7	0	0	0	0	0	18375000	0	0	0
C2 domain-containing protein	EHI_163640	C4M3U4	C4M3U4	24.0474	19	19	19	19	19	0.495025	0.538685	1.68248			3	3	0	0	0	0	0	3	9.3	9.3	9.3	48.604	0	2.6114	17338000	24	2	3	0	0	0	0	0	431	431	9.3	0	0	0	0	0	17338000	0	0	0
HEAT repeat domain containing protein	EHI_124530	C4LZI8	C4LZI8	24.0422	19	19	19	19	19	0.495025	0.538685	1.68073			2	2	0	0	0	0	0	2	6.2	6.2	6.2	34.272	0.0007278	1.9718	17275000	18	1	2	0	0	0	0	0	308	308	6.2	0	0	0	0	0	17275000	0	0	0
Thioredoxin, putative	EHI_026340	C4M5V0	C4M5V0	19	19	24.0197	19	19	19	0.495025	0.538685	1.67324			2	0	0	2	0	0	0	2	18.9	18.9	18.9	14.478	0.0038885	1.2698	17008000	7	3	0	0	2	0	0	0	127	127	0	0	18.9	0	0	0	0	0	17008000	0
Importin beta-3 subunit family protein, putative	EHI_196970	C4LVB5	C4LVB5	19	19	24	19	19	19	0.495025	0.538685	1.66666			3	0	0	3	0	0	0	3	5	5	5	109.02	0	16.053	16777000	44	3	0	0	3	0	0	0	964	964	0	0	5	0	0	0	0	0	16777000	0
Uncharacterized protein	EHI_143640	C4M810	C4M810	23.978	19	19	19	19	19	0.495025	0.538685	1.65932			2	2	0	0	0	0	0	2	8.1	8.1	8.1	30.633	0	4.6239	16523000	16	2	2	0	0	0	0	0	273	273	8.1	0	0	0	0	0	16523000	0	0	0
19S cap proteasome S2 subunit	EHI_198010	C4MB71	C4MB71	23.9737	19	19	19	19	19	0.495025	0.538685	1.6579			2	2	0	0	0	0	0	2	3	3	3	92.043	0	3.3277	16474000	45	2	2	0	0	0	0	0	843	843	3	0	0	0	0	0	16474000	0	0	0
Uncharacterized protein	EHI_150400	C4M221	C4M221	23.9576	19	19	19	19	19	0.495025	0.538685	1.65252			1	1	1	0	0	0	0	1	3.5	3.5	3.5	35.868	0	2.5623	16291000	13	2	1	1	0	0	0	0	312	312	3.5	3.5	0	0	0	0	16291000	0	0	0
DnaJ domain containing protein	EHI_197050	C4LVC2	C4LVC2	23.9544	19	19	19	19	19	0.495025	0.538685	1.65146			1	1	0	0	0	0	0	1	2.9	2.9	2.9	48.909	0	4.3386	16255000	15	1	1	0	0	0	0	0	418	418	2.9	0	0	0	0	0	16255000	0	0	0
Tetraspanin family protein	EHI_024370	B1N388	B1N388	23.8542	19	19	19	19	19	0.495025	0.538685	1.61808			2	2	0	0	0	0	0	2	14.6	14.6	14.6	23.552	0	4.6037	15165000	4	2	2	0	0	0	0	0	212	212	14.6	0	0	0	0	0	15165000	0	0	0
phosphoglucomutase (alpha-D-glucose-1,6-bisphosphate-dependent)	EHI_084950	C4M1K5	C4M1K5	23.8435	19	19	19	19	19	0.495025	0.538685	1.61448			3	2	1	0	0	0	0	3	9.9	9.9	9.9	49.707	0	4.3428	15052000	23	2	2	1	0	0	0	0	454	454	7.3	2.6	0	0	0	0	15052000	0	0	0
Rho guanine nucleotide exchange factor, putative	EHI_005910	C4M2M6	C4M2M6	19	19	23.8236	19	19	19	0.495025	0.538685	1.60786			2	0	0	2	0	0	0	2	3.3	3.3	3.3	106.9	0	4.7465	14846000	58	2	0	0	2	0	0	0	921	921	0	0	3.3	0	0	0	0	0	14846000	0
Ras-GEF domain-containing protein	EHI_181600	C4M8S2	C4M8S2	19	19	23.821	19	19	19	0.495025	0.538685	1.60701			1	0	0	1	0	0	0	1	1.6	1.6	1.6	66.937	0.00075586	2.2215	14820000	29	1	0	0	1	0	0	0	573	573	0	0	1.6	0	0	0	0	0	14820000	0
Guanine nucleotide exchange factor	EHI_049610	C4LUG2	C4LUG2	19	19	23.8166	19	19	19	0.495025	0.538685	1.60552			1	0	0	1	0	0	0	1	1.6	1.6	1.6	72.556	0.0062814	1.1106	14774000	39	1	0	0	1	0	0	0	630	630	0	0	1.6	0	0	0	0	0	14774000	0
THH1/TOM1/TOM3 domain-containing protein	EHI_169370	C4M253	C4M253	23.8121	19	19	19	19	19	0.495025	0.538685	1.60402			1	1	0	0	0	0	0	1	2.9	2.9	2.9	36.229	0.006875	1.0996	14728000	8	1	1	0	0	0	0	0	309	309	2.9	0	0	0	0	0	14728000	0	0	0
Thioredoxin domain-containing protein	EHI_148360	C4LT06	C4LT06	23.8061	19	19	19	19	19	0.495025	0.538685	1.60202			2	2	0	0	0	0	0	2	14.4	14.4	14.4	18.416	0	5.7373	14667000	8	2	2	0	0	0	0	0	153	153	14.4	0	0	0	0	0	14667000	0	0	0
Derlin	EHI_035580	C4LXY8	C4LXY8	23.7967	19	19	19	19	19	0.495025	0.538685	1.5989			2	2	0	0	0	0	0	2	10.2	10.2	10.2	30.204	0	10.275	14572000	5	2	2	0	0	0	0	0	254	254	10.2	0	0	0	0	0	14572000	0	0	0
60S ribosome subunit biogenesis protein NIP7, putative; 60S ribosome subunit biogenesis protein NIP7 homolog	EHI_038310	B1N2Y4;C4M4L2;B1N5A1	B1N2Y4;C4M4L2;B1N5A1	19	19	23.7677	19	19	19	0.495025	0.538685	1.58923			1	0	0	1	0	0	0	1	17.4	17.4	17.4	10.182	1	-2	14282000	5	1	0	0	1	0	0	0	86	NaN	0	0	17.4	0	0	0	0	0	14282000	0
Tyrosine kinase, putative	EHI_087800	C4LXW0;C4M315	C4LXW0;C4M315	23.7481	19	19	19	19	19	0.495025	0.538685	1.58269			2	2	0	0	0	0	0	2	3.4	2.7	2.7	124.27	0.010174	0.89602	14089000	53	1	2	0	0	0	0	0	1104	NaN	3.4	0	0	0	0	0	14089000	0	0	0
Amino acid-polyamine transporter, putative	EHI_100280	C4M0U9	C4M0U9	23.737	19	19	19	19	19	0.495025	0.538685	1.57899			1	1	0	0	0	0	0	1	2.2	2.2	2.2	60.275	0	2.3595	13981000	15	1	1	0	0	0	0	0	545	545	2.2	0	0	0	0	0	13981000	0	0	0
Grainin, putative	EHI_060380	C4M6J3	C4M6J3	23.7238	19	19	19	19	19	0.495025	0.538685	1.5746			1	1	0	0	0	0	0	1	4.7	4.7	4.7	25.152	0.002623	1.3212	13854000	11	1	1	0	0	0	0	0	215	215	4.7	0	0	0	0	0	13854000	0	0	0
Helicase domain-containing protein	EHI_001430	C4MAR8	C4MAR8	19	19	23.7174	19	19	19	0.495025	0.538685	1.57248			1	0	0	1	0	0	0	1	1.4	1.4	1.4	88.638	1	-2	13793000	44	0	0	0	1	0	0	0	759	759	0	0	1.4	0	0	0	0	0	13793000	0
60S acidic ribosomal protein P2, putative	EHI_179980	C4M649;C4LVQ0	C4M649;C4LVQ0	23.7057	19	19	19	19	19	0.495025	0.538685	1.56856			1	1	1	0	0	0	0	1	22.9	13.3	13.3	11.395	0	3.8162	13681000	6	2	1	1	0	0	0	0	105	NaN	22.9	13.3	0	0	0	0	13681000	0	0	0
Rab family GTPase	EHI_010660	A0A8U0WPY5	A0A8U0WPY5	23.7051	19	19	19	19	19	0.495025	0.538685	1.56838			2	1	0	1	0	0	0	2	14.7	14.7	14.7	21.363	0	6.3792	13676000	9	2	1	0	1	0	0	0	191	191	8.9	0	5.8	0	0	0	13676000	0	0	0
Uncharacterized protein	EHI_045070	C4LTC2	C4LTC2	23.6954	19	19	19	19	19	0.495025	0.538685	1.56514			1	1	0	0	0	0	0	1	3.9	3.9	3.9	23.636	0.0013378	1.4063	13584000	4	1	1	0	0	0	0	0	206	206	3.9	0	0	0	0	0	13584000	0	0	0
Origin recognition complex subunit 2	EHI_068220	C4LU15	C4LU15	19	19	23.6725	19	19	19	0.495025	0.538685	1.5575			1	0	0	1	0	0	0	1	2.1	2.1	2.1	38.353	1	-2	13370000	17	1	0	0	1	0	0	0	331	331	0	0	2.1	0	0	0	0	0	13370000	0
Sodium/sulfate symporter, putative	EHI_015330	C4M0X1	C4M0X1	23.6344	19	19	19	19	19	0.495025	0.538685	1.54482			3	3	0	0	0	0	0	3	4.4	4.4	4.4	77.674	0.0013661	1.5707	13022000	24	3	3	0	0	0	0	0	689	689	4.4	0	0	0	0	0	13022000	0	0	0
Transporter, major facilitator family	EHI_008110	B1N318	B1N318	23.6301	19	19	19	19	19	0.495025	0.538685	1.54337			2	2	0	0	0	0	0	2	3.9	3.9	3.9	56.292	0	3.9711	12983000	13	2	2	0	0	0	0	0	508	508	3.9	0	0	0	0	0	12983000	0	0	0
Uncharacterized protein	EHI_068670	C4LU57	C4LU57	19	23.6267	19	19	19	19	0.495025	0.538685	1.54222			1	0	1	0	0	0	0	1	4.2	4.2	4.2	19.197	0.0062696	1.1076	12952000	6	1	0	1	0	0	0	0	166	166	0	4.2	0	0	0	0	0	12952000	0	0
non-specific serine/threonine protein kinase	EHI_044470	B1N2G7	B1N2G7	19	23.6204	19	19	19	19	0.495025	0.538685	1.54014			1	0	1	1	0	0	0	1	2.5	2.5	2.5	50.661	0.0032616	1.3038	12896000	21	3	0	1	1	0	0	0	440	440	0	2.5	2.5	0	0	0	0	12896000	0	0
Uncharacterized protein	EHI_098390	C4LXC1	C4LXC1	23.6197	19	19	19	19	19	0.495025	0.538685	1.53992			2	2	0	0	0	0	0	2	4	4	4	69.318	0.0013559	1.4985	12890000	34	1	2	0	0	0	0	0	601	601	4	0	0	0	0	0	12890000	0	0	0
Cdc37 Hsp90 binding domain-containing protein	EHI_050700	C4LTU0	C4LTU0	23.6159	19	19	19	19	19	0.495025	0.538685	1.53865			1	1	0	0	0	0	0	1	6.7	6.7	6.7	17.48	0.00070721	1.8107	12856000	8	1	1	0	0	0	0	0	150	150	6.7	0	0	0	0	0	12856000	0	0	0
Pumilio family RNA-binding protein	EHI_026330	C4M5U9	C4M5U9	23.5871	19	19	19	19	19	0.495025	0.538685	1.52905			1	1	0	0	0	0	0	1	3	3	3	61.584	1	-2	12602000	24	1	1	0	0	0	0	0	528	528	3	0	0	0	0	0	12602000	0	0	0
Uncharacterized protein	EHI_188980	C4M2W5	C4M2W5	23.5781	19	19	19	19	19	0.495025	0.538685	1.52603			1	1	0	0	0	0	0	1	2.1	2.1	2.1	56.016	0	3.8089	12523000	22	1	1	0	0	0	0	0	482	482	2.1	0	0	0	0	0	12523000	0	0	0
Uncharacterized protein	EHI_126890	C4LWW5	C4LWW5	23.4791	19	19	19	19	19	0.495025	0.538685	1.49305			1	1	0	0	0	0	0	1	3.5	3.5	3.5	33.266	0.0026247	1.3212	11693000	13	1	1	0	0	0	0	0	289	289	3.5	0	0	0	0	0	11693000	0	0	0
DEAD/DEAH box helicase, putative	EHI_036900	C4M9V7	C4M9V7	19	19	23.4717	19	19	19	0.495025	0.538685	1.49057			2	0	0	2	0	0	0	2	14.3	9.8	9.8	47.709	0	6.0021	11633000	24	2	0	0	2	0	0	0	419	419	4.5	1.9	9.8	0	0	0	0	0	11633000	0
Sodium/sulfate symporter, putative	EHI_147510	C4M6M7	C4M6M7	23.4556	19	19	19	19	19	0.495025	0.538685	1.48521			2	2	0	0	0	0	0	2	3.4	3.4	3.4	86.827	0	5.6544	11504000	34	2	2	0	0	0	0	0	784	784	3.4	0	0	0	0	0	11504000	0	0	0
G domain-containing protein	EHI_165770	C4MBF1	C4MBF1	23.4162	19	19	19	19	19	0.495025	0.538685	1.47207			1	1	0	0	0	0	0	1	6.7	6.7	6.7	23.35	0.003251	1.2851	11194000	12	1	1	0	0	0	0	0	208	208	6.7	0	0	0	0	0	11194000	0	0	0
Zinc finger domain containing protein	EHI_073180	C4MBH5	C4MBH5	23.3727	19	19	19	19	19	0.495025	0.538685	1.45755			1	1	0	0	0	0	0	1	7.8	7.8	7.8	11.746	0.0062854	1.1135	10861000	5	1	1	0	0	0	0	0	102	102	7.8	0	0	0	0	0	10861000	0	0	0
Calmodulin, putative	EHI_023500	C4LUQ9	C4LUQ9	23.3321	19	19	19	19	19	0.495025	0.538685	1.44404			2	2	0	1	0	0	0	2	15	15	15	17.41	0	2.6283	10560000	11	3	2	0	1	0	0	0	153	153	15	0	7.2	0	0	0	10560000	0	0	0
Uncharacterized protein	EHI_031300	C4M4L9	C4M4L9	23.3024	19	19	19	19	19	0.495025	0.538685	1.43414			1	1	0	0	0	0	0	1	6.7	6.7	6.7	27.688	0	3.3853	10345000	8	1	1	0	0	0	0	0	239	239	6.7	0	0	0	0	0	10345000	0	0	0
ATP-dependent (S)-NAD(P)H-hydrate dehydratase	EHI_194450	C4LZV8	C4LZV8	23.2562	19	19	19	19	19	0.495025	0.538685	1.41875			2	2	0	0	0	0	0	2	8.3	8.3	8.3	32.622	0.00071994	1.9135	10019000	17	2	2	0	0	0	0	0	300	300	8.3	0	0	0	0	0	10019000	0	0	0
Rab family GTPase	EHI_189990	C4M717	C4M717	23.2523	19	19	19	19	19	0.495025	0.538685	1.41745			1	1	0	0	0	0	0	1	10.2	5.1	5.1	21.73	1	-2	9992000	13	0	1	0	0	0	0	0	197	197	10.2	5.1	5.1	0	5.1	5.1	9992000	0	0	0
Guanine nucleotide-binding protein subunit beta, putative	EHI_000240	C4LZ87	C4LZ87	23.251	19	19	19	19	19	0.495025	0.538685	1.41701			2	2	0	0	0	0	0	2	11.1	11.1	11.1	38.972	0	9.741	9983000	11	2	2	0	0	0	0	0	351	351	11.1	0	0	0	0	0	9983000	0	0	0
Uncharacterized protein	EHI_045010	C4LTB6	C4LTB6	23.2365	19	19	19	19	19	0.495025	0.538685	1.41215			1	1	0	0	0	0	0	1	12.8	12.8	12.8	21.744	0	2.9876	9882600	6	2	1	0	0	0	0	0	188	188	12.8	0	0	0	0	0	9882600	0	0	0
Palmitoyltransferase	EHI_198560	C4LWQ2	C4LWQ2	23.2233	19	19	19	19	19	0.495025	0.538685	1.40777			1	1	0	0	0	0	0	1	3.1	3.1	3.1	38.238	0	2.9215	9792900	13	0	1	0	0	0	0	0	324	324	3.1	0	0	0	0	0	9792900	0	0	0
Uncharacterized protein	EHI_155760	C4LWC5	C4LWC5	23.2086	19	19	19	19	19	0.495025	0.538685	1.40287			1	1	0	0	0	0	0	1	1.4	1.4	1.4	83.84	0.00072202	1.9234	9693700	36	1	1	0	0	0	0	0	726	726	1.4	0	0	0	0	0	9693700	0	0	0
Uncharacterized protein	EHI_135910	B1N566;B1N498	B1N566;B1N498	23.1582	19	19	19	19	19	0.495025	0.538685	1.38605			1	1	0	0	0	0	0	1	12.4	12.4	12.4	13.331	0.0013652	1.5552	9360500	3	1	1	0	0	0	0	0	113	NaN	12.4	0	0	0	0	0	9360500	0	0	0
Protein kinase, putative	EHI_044640	C4LT85	C4LT85	19	19	23.154	19	19	19	0.495025	0.538685	1.38468			1	0	0	1	0	0	0	1	8.1	8.1	8.1	43.871	0	4.2569	9333900	15	1	0	0	1	0	0	0	384	384	0	0	8.1	0	0	0	0	0	9333900	0
26S proteasome regulatory subunit RPN2 C-terminal domain-containing protein	EHI_049680	C4LUG9	C4LUG9	19	19	23.1363	19	19	19	0.495025	0.538685	1.37877			2	0	0	2	0	0	0	2	3.4	3.4	3.4	101.99	0	5.892	9219800	44	2	0	0	2	0	0	0	909	909	0	0	3.4	0	0	0	0	0	9219800	0
Uncharacterized protein	EHI_178870	C4LUV1	C4LUV1	23.1179	19	19	19	19	19	0.495025	0.538685	1.37262			2	2	0	0	0	0	0	2	4.3	4.3	4.3	78.97	0	5.455	9102700	29	1	2	0	0	0	0	0	699	699	4.3	0	0	0	0	0	9102700	0	0	0
Uncharacterized protein	EHI_140680	C4M3P0	C4M3P0	23.0798	19	19	19	19	19	0.495025	0.538685	1.35995			2	2	0	0	0	0	0	2	4.2	4.2	4.2	75.185	0.0050826	1.1495	8865900	32	2	2	0	0	0	0	0	650	650	4.2	0	0	0	0	0	8865900	0	0	0
Uncharacterized protein	EHI_052720	B1N3L4	B1N3L4	23.0788	19	19	19	19	19	0.495025	0.538685	1.35959			1	1	0	0	0	0	0	1	12.9	12.9	12.9	23.121	0	7.5927	8859400	11	1	1	0	0	0	0	0	202	202	12.9	0	0	0	0	0	8859400	0	0	0
Protein kinase domain-containing protein	EHI_158160	C4M2D5	C4M2D5	23.0637	19	19	19	19	19	0.495025	0.538685	1.35455			3	3	0	0	0	0	0	3	7.1	7.1	7.1	60.942	0	5.1045	8767000	17	4	3	0	0	0	0	0	524	524	7.1	0	0	0	0	0	8767000	0	0	0
Guanine nucleotide exchange factor, putative; Rho guanine nucleotide exchange factor, putative	EHI_192390	B1N3B7;C4M3I1	B1N3B7;C4M3I1	23.0404	19	19	19	19	19	0.495025	0.538685	1.3468			1	1	0	0	0	0	0	1	3.8	3.8	3.8	36.951	0	7.4119	8626800	19	1	1	0	0	0	0	0	314	NaN	3.8	0	0	0	0	0	8626800	0	0	0
SMP-LTD domain-containing protein	EHI_160220	C4MBK8	C4MBK8	23.0346	19	19	19	19	19	0.495025	0.538685	1.34486			4	2	1	1	0	1	0	4	8.5	8.5	8.5	54.869	0	2.8574	8592100	21	5	2	1	1	0	1	0	472	472	4	2.1	2.5	0	1.9	0	8592100	0	0	0
MmpL efflux pump, putative	EHI_065680	C4LZY4	C4LZY4	23.0157	19	19	19	19	19	0.495025	0.538685	1.33857			2	2	0	0	0	0	0	2	3	3	3	95.071	0.010089	0.85616	8480500	34	2	2	0	0	0	0	0	840	840	3	0	0	0	0	0	8480500	0	0	0
MHD domain-containing protein	EHI_189900	C4M721	C4M721	19	19	23.0096	19	19	19	0.495025	0.538685	1.33653			1	0	0	1	0	0	0	1	3.7	3.7	3.7	58.557	0	3.3249	8444500	26	2	0	0	1	0	0	0	509	509	0	0	3.7	0	0	0	0	0	8444500	0
Uncharacterized protein	EHI_143120	B1N4T3	B1N4T3	23.0025	19	19	19	19	19	0.495025	0.538685	1.33415			1	1	0	0	0	0	0	1	8.9	3.7	3.7	44.964	0.010071	0.84557	8402900	20	1	1	0	0	0	0	0	382	382	8.9	2.9	2.9	0	0	0	8402900	0	0	0
Tetraspanin family protein	EHI_097600	C4M931	C4M931	22.976	19	19	19	19	19	0.495025	0.538685	1.32535			1	1	0	0	0	0	0	1	11.5	11.5	11.5	23.909	0.0038785	1.2416	8250500	6	1	1	0	0	0	0	0	209	209	11.5	0	0	0	0	0	8250500	0	0	0
Rap-GAP domain-containing protein	EHI_125900	C4LVX6	C4LVX6	22.9755	19	19	19	19	19	0.495025	0.538685	1.32515			2	2	0	0	0	0	0	2	1.8	1.8	1.8	134.85	0	2.4276	8247100	67	2	2	0	0	0	0	0	1179	1179	1.8	0	0	0	0	0	8247100	0	0	0
Long-chain-fatty-acid--CoA ligase, putative	EHI_185240	C4M3Z2	C4M3Z2	22.9701	19	19	19	19	19	0.495025	0.538685	1.32336			1	1	0	0	0	0	0	1	1.8	1.8	1.8	87.191	0	4.0919	8216500	40	1	1	0	0	0	0	0	774	774	1.8	0	0	0	0	0	8216500	0	0	0
Rab3-GAP regulatory subunit N-terminal domain-containing protein	EHI_138010	C4LZG1	C4LZG1	22.9589	19	19	19	19	19	0.495025	0.538685	1.31963			1	1	0	0	0	0	0	1	1.9	1.9	1.9	47.966	0.0098099	1	8152900	22	1	1	0	0	0	0	0	417	417	1.9	0	0	0	0	0	8152900	0	0	0
40S ribosomal protein S2, putative	EHI_020280	C4M7U0	C4M7U0	19	19	22.9542	19	19	19	0.495025	0.538685	1.31806			1	0	0	1	0	0	0	1	4.7	4.7	4.7	27.687	0.0013369	1.4033	8126400	16	1	0	0	1	0	0	0	255	255	0	0	4.7	0	0	0	0	0	8126400	0
Acetyltransferase, GNAT family	EHI_167080	C4LYA9	C4LYA9	19	19	22.9481	19	19	19	0.495025	0.538685	1.31602			1	0	0	1	0	0	0	1	6.7	6.7	6.7	17.442	0.0099824	0.81286	8092000	7	1	0	0	1	0	0	0	149	149	0	0	6.7	0	0	0	0	0	8092000	0
G-protein coupled receptors family 2 profile 2 domain-containing protein	EHI_105070	C4M112	C4M112	22.935	19	19	19	19	19	0.495025	0.538685	1.31165			1	1	0	0	0	0	0	1	4.4	4.4	4.4	36.86	0.005707	1.1461	8018800	7	1	1	0	0	0	0	0	319	319	4.4	0	0	0	0	0	8018800	0	0	0
Protein phosphatase, putative	EHI_162200	C4M8I7	C4M8I7	22.9261	19	19	19	19	19	0.495025	0.538685	1.30869			1	1	0	0	0	0	0	1	2.1	2.1	2.1	53.605	0.00073475	2.0532	7969500	24	1	1	0	0	0	0	0	473	473	2.1	0	0	0	0	0	7969500	0	0	0
RhoGAP domain containing protein	EHI_022860	C4LUJ9	C4LUJ9	19	19	22.9256	19	19	19	0.495025	0.538685	1.30854			1	1	0	1	0	0	0	1	1.9	1.9	1.9	69.731	0.0092194	1.0164	7967000	30	2	1	0	1	0	0	0	593	593	1.9	0	1.9	0	0	0	0	0	7967000	0
Uncharacterized protein	EHI_192530	C4M1H3	C4M1H3	19	19	22.8661	19	19	19	0.495025	0.538685	1.28871			1	0	0	1	0	0	0	1	3.7	3.7	3.7	52.598	0	2.4734	7645300	20	1	0	0	1	0	0	0	465	465	0	0	3.7	0	0	0	0	0	7645300	0
PH domain containing protein	EHI_049310	C4LUD3	C4LUD3	22.8612	19	19	19	19	19	0.495025	0.538685	1.28705			2	2	0	0	0	0	0	2	5.7	5.7	5.7	65.791	0	23.211	7618900	14	2	2	0	0	0	0	0	575	575	5.7	0	0	0	0	0	7618900	0	0	0
Ras GTPase-activating protein, putative	EHI_001910	C4M5K5	C4M5K5	19	19	22.8396	19	19	19	0.495025	0.538685	1.27986			2	0	0	1	1	0	0	2	5.4	5.4	5.4	48.677	0.0026161	1.3157	7505900	30	2	0	0	1	1	0	0	426	426	0	0	2.8	2.6	0	0	0	0	7505900	0
Cornichon protein	EHI_115360	C4M8E7	C4M8E7	22.8299	19	19	19	19	19	0.495025	0.538685	1.27664			1	1	0	0	0	0	0	1	12.6	12.6	12.6	17.08	0	10.23	7455700	5	1	1	0	0	0	0	0	143	143	12.6	0	0	0	0	0	7455700	0	0	0
Uncharacterized protein	EHI_008440	C4M0M0	C4M0M0	22.8112	19	19	19	19	19	0.495025	0.538685	1.27039			2	2	0	0	0	0	0	2	8.8	8.8	8.8	29.029	0.00074738	2.1558	7359400	11	2	2	0	0	0	0	0	249	249	8.8	0	0	0	0	0	7359400	0	0	0
Plasma membrane calcium-transporting ATPase 1, putative	EHI_001150	B1N3C2	B1N3C2	22.7859	19	19	19	19	19	0.495025	0.538685	1.26195			1	1	0	0	0	0	0	1	5	2.5	2.5	76.545	0	9.8794	7231500	33	1	1	0	0	0	0	0	685	685	3.6	1	2.3	0	0	0	7231500	0	0	0
Serine/threonine-protein phosphatase	EHI_051890	C4LY80;C4LUV2	C4LY80;C4LUV2	22.7825	19	19	19	19	19	0.495025	0.538685	1.26084			1	1	0	0	0	0	0	1	3.6	3.6	3.6	34.886	0.0038437	1.1915	7214800	15	1	1	0	0	0	0	0	304	NaN	3.6	0	0	0	0	0	7214800	0	0	0
Ribokinase	EHI_138020	C4LZG2	C4LZG2	22.7751	19	19	19	19	19	0.495025	0.538685	1.25837			1	1	0	0	0	0	0	1	6	6	6	34.573	0	2.4732	7177800	18	1	1	0	0	0	0	0	315	315	6	0	0	0	0	0	7177800	0	0	0
C2 domain containing protein	EHI_110470	C4LU98	C4LU98	22.7735	19	19	19	19	19	0.495025	0.538685	1.25784			1	1	0	0	0	0	0	1	5	5	5	38.898	0.009816	1.0003	7169900	17	1	1	0	0	0	0	0	339	339	5	0	0	0	0	0	7169900	0	0	0
Apyrase	EHI_050690	C4LTT9	C4LTT9	22.7609	19	19	19	19	19	0.495025	0.538685	1.25364			1	1	0	0	0	0	0	1	2.8	2.8	2.8	36.382	0.00071174	1.8297	7107500	13	1	1	0	0	0	0	0	321	321	2.8	0	0	0	0	0	7107500	0	0	0
COMM domain-containing protein 3	EHI_011880	B1N2I1	B1N2I1	22.7532	19	19	19	19	19	0.495025	0.538685	1.25107			1	1	0	1	0	0	0	1	8.4	8.4	8.4	20.546	0	4.8523	7069600	12	2	1	0	1	0	0	0	178	178	8.4	0	8.4	0	0	0	7069600	0	0	0
Chromo domain-containing protein	EHI_130890	C4LXF7	C4LXF7	22.7438	19	19	19	19	19	0.495025	0.538685	1.24794			2	2	0	0	0	0	0	2	2.4	2.4	2.4	112.48	0.0026298	1.3313	7023800	54	3	2	0	0	0	0	0	965	965	2.4	0	0	0	0	0	7023800	0	0	0
Uncharacterized protein	EHI_130950	C4LXG3	C4LXG3	22.7397	19	19	19	19	19	0.495025	0.538685	1.24658			1	1	0	0	0	0	0	1	3.9	3.9	3.9	29.865	0.0097979	0.9928	7003900	10	1	1	0	0	0	0	0	255	255	3.9	0	0	0	0	0	7003900	0	0	0
THH1/TOM1/TOM3 domain-containing protein	EHI_108770	C4M841	C4M841	22.7301	19	19	19	19	19	0.495025	0.538685	1.24337			1	1	0	0	0	0	0	1	5.4	5.4	5.4	29.912	0.0044586	1.1584	6957400	6	1	1	0	0	0	0	0	257	257	5.4	0	0	0	0	0	6957400	0	0	0
Translation initiation factor 2 beta subunit, putative	EHI_153480	C4LSD9	C4LSD9	22.7223	19	19	19	19	22.1567	0.495025	0.538685	1.24076			1	1	0	1	0	0	1	1	6	6	6	23.065	0.001336	1.4022	11595000	12	3	1	0	1	0	0	1	201	201	6	0	6	0	0	6	6919700	0	0	0
Hydrolase, carbon-nitrogen family	EHI_139310	C4M6W0	C4M6W0	22.7026	19	19	19	19	19	0.495025	0.538685	1.2342			1	1	1	1	0	0	0	1	5.2	5.2	5.2	30.61	0.0007622	2.2581	6826000	13	4	1	1	1	0	0	0	267	267	5.2	5.2	5.2	0	0	0	6826000	0	0	0
BRO1 domain-containing protein	EHI_165220	C4M203	C4M203	19	19	22.6079	19	19	19	0.495025	0.538685	1.20263			2	0	0	2	0	0	0	2	3.5	3.5	3.5	103	0	2.6773	6392200	47	1	0	0	2	0	0	0	898	898	0	0	3.5	0	0	0	0	0	6392200	0
RhoGAP domain containing protein	EHI_159300	C4LX23	C4LX23	19	19	22.6018	19	19	19	0.495025	0.538685	1.2006			1	0	0	1	0	0	0	1	3.3	3.3	3.3	69.328	0	2.5322	6365300	30	1	0	0	1	0	0	0	606	606	0	0	3.3	0	0	0	0	0	6365300	0
BZIP domain-containing protein	EHI_053180	C4M3D5	C4M3D5	22.5929	19	19	19	19	19	0.495025	0.538685	1.19764			1	1	0	0	0	0	0	1	11.1	11.1	11.1	16.362	1	-2	6326300	7	1	1	0	0	0	0	0	135	135	11.1	0	0	0	0	0	6326300	0	0	0
Peptidase C1A papain C-terminal domain-containing protein	EHI_152220	C4LSR0	C4LSR0	22.583	19	19	19	19	19	0.495025	0.538685	1.19432			1	1	0	0	0	0	0	1	5.4	5.4	5.4	58.087	0	3.3114	6282700	21	1	1	0	0	0	0	0	502	502	5.4	0	0	0	0	0	6282700	0	0	0
F-box domain containing membrane protein, putative	EHI_200760	C4M3Y1	C4M3Y1	22.574	19	19	19	19	19	0.495025	0.538685	1.19132			1	1	0	0	0	0	0	1	2.1	2.1	2.1	48.752	0.0074442	1.0712	6243700	11	1	1	0	0	0	0	0	424	424	2.1	0	0	0	0	0	6243700	0	0	0
EhSyntaxin D1	EHI_117250	A0A8U0WP76	A0A8U0WP76	22.5593	19	19	19	19	19	0.495025	0.538685	1.18642			1	1	0	0	0	0	0	1	15.6	15.6	15.6	12.599	0.0013578	1.5022	6180400	4	0	1	0	0	0	0	0	109	109	15.6	0	0	0	0	0	6180400	0	0	0
Phospholipid-transporting ATPase	EHI_024120	C4MA58	C4MA58	22.5557	19	19	19	19	19	0.495025	0.538685	1.18524			1	1	0	0	0	0	0	1	1.4	1.4	1.4	119.83	0	2.6858	6165200	44	3	1	0	0	0	0	0	1055	1055	1.4	0	0	0	0	0	6165200	0	0	0
Trafficking protein particle complex subunit 11 C-terminal domain-containing protein	EHI_168350	C4M4P5	C4M4P5	22.5457	19	19	19	19	19	0.495025	0.538685	1.18189			1	1	0	0	0	0	0	1	1.6	1.6	1.6	86.269	0.00072622	1.9572	6122400	34	1	1	0	0	0	0	0	752	752	1.6	0	0	0	0	0	6122400	0	0	0
Calcineurin B subunit, putative	EHI_106670	C4MBI6	C4MBI6	19	19	22.5321	19	19	19	0.495025	0.538685	1.17736			1	0	0	1	0	0	0	1	11.7	11.7	11.7	20.62	0.0098837	0.76613	6065000	10	2	0	0	1	0	0	0	179	179	0	0	11.7	0	0	0	0	0	6065000	0
Uncharacterized protein	EHI_007640	C4LYC5	C4LYC5	19	19	22.5124	19	19	19	0.495025	0.538685	1.1708			1	0	0	1	0	0	0	1	1.4	1.4	1.4	139.57	0.0013633	1.5456	5982800	56	1	0	0	1	0	0	0	1190	1190	0	0	1.4	0	0	0	0	0	5982800	0
arginine--tRNA ligase	EHI_127020	C4LWX7	C4LWX7	19	19	22.5124	19	19	19	0.495025	0.538685	1.17079			1	0	0	1	0	0	0	1	1.6	1.6	1.6	64.636	0.0086154	1.0253	5982700	38	1	0	0	1	0	0	0	573	573	0	0	1.6	0	0	0	0	0	5982700	0
Uncharacterized protein	EHI_104730	C4LZ81	C4LZ81	22.5041	19	19	19	19	19	0.495025	0.538685	1.16802			1	1	0	0	0	0	0	1	1.4	1.4	1.4	65.848	0.010113	0.8815	5948400	29	1	1	0	0	0	0	0	560	560	1.4	0	0	0	0	0	5948400	0	0	0
Cilia- and flagella-associated protein 61 N-terminal domain-containing protein	EHI_035720	C4LY01	C4LY01	22.4998	19	19	19	19	19	0.495025	0.538685	1.1666			1	1	1	0	0	0	0	1	1.7	1.7	1.7	95.008	0.0013755	1.6065	5930800	50	2	1	1	0	0	0	0	828	828	1.7	1.7	0	0	0	0	5930800	0	0	0
Protein kinase, putative	EHI_053060	C4M3C4	C4M3C4	19	19	22.489	19	19	19	0.495025	0.538685	1.16299			1	0	1	1	0	0	0	1	3.1	3.1	3.1	50.001	0	2.636	5886500	24	2	0	1	1	0	0	0	446	446	0	3.1	3.1	0	0	0	0	0	5886500	0
RNA-binding protein TIA-1, putative	EHI_056660	C4M9T1	C4M9T1	19	19	22.4872	19	19	19	0.495025	0.538685	1.1624			1	0	0	1	0	0	0	1	5.6	5.6	5.6	34.622	0	3.9242	5879200	15	1	0	0	1	0	0	0	306	306	0	0	5.6	0	0	0	0	0	5879200	0
DEAD/DEAH box helicase, putative	EHI_119920	C4M986	C4M986	22.4811	19	19	19	19	19	0.495025	0.538685	1.16036			2	1	0	1	0	0	0	2	3.2	3.2	3.2	81.139	0.00070572	1.7923	5854400	36	2	1	0	1	0	0	0	723	723	1.9	0	1.2	0	0	0	5854400	0	0	0
Ral GTPase-activating protein subunit alpha/beta N-terminal domain-containing protein	EHI_166480	C4M7F4	C4M7F4	22.4809	19	19	19	19	19	0.495025	0.538685	1.1603			1	1	0	0	0	0	0	1	0.8	0.8	0.8	132.75	0.0080099	1.0278	5853600	64	1	1	0	0	0	0	0	1150	1150	0.8	0	0	0	0	0	5853600	0	0	0
Uncharacterized protein	EHI_050710	C4LTU1	C4LTU1	22.4745	19	19	19	19	19	0.495025	0.538685	1.15817			1	1	0	0	0	0	0	1	1.8	1.8	1.8	50.897	0.010149	0.88641	5827800	22	1	1	0	0	0	0	0	437	437	1.8	0	0	0	0	0	5827800	0	0	0
Histone acetyltransferase	EHI_142000	A0A8U0WPU3	A0A8U0WPU3	19	22.4487	19	19	19	19	0.495025	0.538685	1.14958			1	0	1	0	0	0	0	1	2.2	2.2	2.2	48.49	1	-2	5724600	23	1	0	1	0	0	0	0	414	414	0	2.2	0	0	0	0	0	5724600	0	0
Vacuolar sorting protein 26, putative	EHI_147450	C4M6M1	C4M6M1	19	19	22.4323	19	19	19	0.495025	0.538685	1.14411			1	0	0	1	0	0	0	1	5	5	5	43.651	0	2.7638	5659900	22	1	0	0	1	0	0	0	377	377	0	0	5	0	0	0	0	0	5659900	0
alanine transaminase	EHI_096750	C4LWI5	C4LWI5	22.4318	19	19	19	19	19	0.495025	0.538685	1.14392			1	1	0	1	0	0	0	1	4.3	4.3	4.3	54.52	0	13.853	5657600	25	2	1	0	1	0	0	0	483	483	4.3	0	4.3	0	0	0	5657600	0	0	0
SPIN90/Ldb17 leucine-rich domain-containing protein	EHI_075840	B1N479	B1N479	19	19	22.4297	19	19	19	0.495025	0.538685	1.14325			1	0	0	1	0	0	0	1	4.2	4.2	4.2	38.697	0.00074074	2.0935	5649700	14	1	0	0	1	0	0	0	331	331	0	0	4.2	0	0	0	0	0	5649700	0
Uncharacterized protein	EHI_046620	C4M798;C4M004	C4M798;C4M004	22.4241	19	19	19	19	19	0.495025	0.538685	1.14138			1	1	0	0	0	0	0	1	6.3	6.3	6.3	22.121	0	2.5722	5627800	10	1	1	0	0	0	0	0	189	NaN	6.3	0	0	0	0	0	5627800	0	0	0
Deoxynucleoside kinase domain-containing protein	EHI_001780	C4M5I9	C4M5I9	19	19	22.4145	19	19	19	0.495025	0.538685	1.13818			1	1	1	1	0	0	0	1	5.6	5.6	5.6	25.72	0.00074571	2.1522	5590500	13	3	1	1	1	0	0	0	215	215	5.6	5.6	5.6	0	0	0	0	0	5590500	0
Guanylate-binding protein, putative	EHI_093930	C4LYI4	C4LYI4	19	22.4138	19	19	19	19	0.495025	0.538685	1.13795			2	0	2	0	0	0	0	2	2.7	2.7	2.7	87.961	0.0038936	1.2749	5587800	42	2	0	2	0	0	0	0	752	752	0	2.7	0	0	0	0	0	5587800	0	0
40S ribosomal protein S15, putative	EHI_111980	C4M7H3;C4M7A5;C4M0C6	C4M7H3;C4M7A5;C4M0C6	19	19	22.3811	19	19	19	0.495025	0.538685	1.12703			1	0	0	1	0	0	0	1	11.8	11.8	11.8	16.368	0	4.5359	5462400	6	3	0	0	1	0	0	0	144	NaN	0	0	11.8	0	0	0	0	0	5462400	0
Glycosyltransferase	EHI_049870	C4LUI5	C4LUI5	22.3782	19	19	19	19	19	0.495025	0.538685	1.12606			1	1	0	0	0	0	0	1	5.4	5.4	5.4	37.323	0.0062617	1.1068	5451300	16	1	1	0	0	0	0	0	314	314	5.4	0	0	0	0	0	5451300	0	0	0
Actin, putative	EHI_131230;EHI	C4LXI9;C4M2X6	C4LXI9;C4M2X6	22.3742	19	19	19	19	19	0.495025	0.538685	1.12475			2	2	0	1	0	0	0	2	3.9	3.9	3.9	97.01	0.0007446	2.1426	5436500	26	3	2	0	1	0	0	0	876	NaN	3.9	0	1.9	0	0	0	5436500	0	0	0
rRNA adenine N(6)-methyltransferase	EHI_013870	C4LXN0	C4LXN0	19	19	22.3558	19	19	19	0.495025	0.538685	1.11861			1	0	0	1	0	0	0	1	3.4	3.4	3.4	33.686	1	-2	5367500	18	0	0	0	1	0	0	0	295	295	0	0	3.4	0	0	0	0	0	5367500	0
Uncharacterized protein	EHI_170450	A0A8U0WPC3	A0A8U0WPC3	22.3446	19	19	19	19	19	0.495025	0.538685	1.11488			2	2	0	0	0	0	0	2	12.9	12.9	12.9	24.041	0.00072307	1.9307	5326100	10	2	2	0	0	0	0	0	209	209	12.9	0	0	0	0	0	5326100	0	0	0
Protein kinase	EHI_193290	C4M4T3	C4M4T3	22.33	19	19	19	19	19	0.495025	0.538685	1.11			2	2	0	0	0	0	0	2	2.6	2.6	2.6	113.39	0.00070077	1.7125	5272300	49	1	2	0	0	0	0	0	982	982	2.6	0	0	0	0	0	5272300	0	0	0
DUF2428 domain-containing protein	EHI_014140	C4LXQ2	C4LXQ2	19	19	22.3184	19	19	19	0.495025	0.538685	1.10613			1	0	0	1	0	0	0	1	0.8	0.8	0.8	143.41	0.0097919	0.9928	5230000	67	1	0	0	1	0	0	0	1256	1256	0	0	0.8	0	0	0	0	0	5230000	0
Geranylgeranyl transferase type-2 subunit beta	EHI_025110	A0A8U0WQ10	A0A8U0WQ10	22.3082	19	19	19	19	19	0.495025	0.538685	1.10275			1	1	0	0	0	0	0	1	4.1	4.1	4.1	35.526	0.0099183	0.78252	5193400	16	1	1	0	0	0	0	0	315	315	4.1	0	0	0	0	0	5193400	0	0	0
HD domain-containing protein	EHI_110510	C4LUA0	C4LUA0	19	19	22.3077	19	19	19	0.495025	0.538685	1.10255			1	0	0	1	0	0	0	1	2.4	2.4	2.4	52.81	1	-2	5191300	23	1	0	0	1	0	0	0	451	451	0	0	2.4	0	0	0	0	0	5191300	0
Inositol polyphosphate 5-phosphatase, putative	EHI_153490	C4LSE0	C4LSE0	22.2419	19	19	19	19	19	0.495025	0.538685	1.08065			1	1	0	0	0	0	0	1	3.3	3.3	3.3	88.632	0	2.8297	4960100	46	2	1	0	0	0	0	0	764	764	3.3	0	0	0	0	0	4960100	0	0	0
Importin subunit alpha	EHI_179940	C4M645	C4M645	19	19	22.2338	19	19	19	0.495025	0.538685	1.07794			1	0	0	1	0	0	0	1	2.8	2.8	2.8	54.251	0.0099068	0.78027	4932300	19	1	0	0	1	0	0	0	469	469	0	0	2.8	0	0	0	0	0	4932300	0
Kinase, PfkB family	EHI_157120	C4MAP6	C4MAP6	22.1936	19	19	19	19	19	0.495025	0.538685	1.06452			1	1	0	0	0	0	0	1	6.4	6.4	6.4	35.307	0	6.0094	4796500	12	1	1	0	0	0	0	0	327	327	6.4	0	0	0	0	0	4796500	0	0	0
Rho family GTPase	EHI_153460	C4LSD7	C4LSD7	19	19	22.193	19	19	19	0.495025	0.538685	1.06434			1	0	0	1	0	0	0	1	5.5	5.5	5.5	23.188	0.0038911	1.2737	4794700	12	1	0	0	1	0	0	0	199	199	0	0	5.5	0	0	0	0	0	4794700	0
Uncharacterized protein	EHI_154220	C4M598	C4M598	22.1831	19	19	19	19	19	0.495025	0.538685	1.06104			1	1	0	0	0	0	0	1	3.6	3.6	3.6	45.302	0	4.2739	4761900	13	1	1	0	0	0	0	0	392	392	3.6	0	0	0	0	0	4761900	0	0	0
Uncharacterized protein	EHI_024490	C4M0J1	C4M0J1	22.1782	19	19	19	19	19	0.495025	0.538685	1.05939			1	1	0	0	0	0	0	1	14.3	5.7	5.7	25.686	0	11	4745600	7	1	1	0	0	0	0	0	230	230	14.3	4.3	8.7	0	0	4.3	4745600	0	0	0
DNA/RNA-binding protein Alba-like domain-containing protein	EHI_006070	C4M2P1	C4M2P1	19	19	22.169	19	19	19	0.495025	0.538685	1.05634			2	0	1	1	0	0	0	2	6.7	6.7	6.7	26.107	0.0097859	0.99178	4715600	9	2	0	1	1	0	0	0	223	223	0	3.6	3.1	0	0	0	0	0	4715600	0
Ras guanine nucleotide exchange factor, putative	EHI_128480	C4M9R7	C4M9R7	22.1467	19	19	19	19	19	0.495025	0.538685	1.0489			1	1	0	0	0	0	0	1	1.1	1.1	1.1	136.47	0.0019854	1.3548	4643200	58	1	1	0	0	0	0	0	1190	1190	1.1	0	0	0	0	0	4643200	0	0	0
Acyl-CoA:1-acylglycerol-3-phosphate acyltransferase, putative	EHI_097610	C4M932	C4M932	22.1068	19	19	19	19	19	0.495025	0.538685	1.03559			1	1	0	0	0	0	0	1	3.4	3.4	3.4	38.472	0.0007391	2.0784	4516500	15	1	1	0	0	0	0	0	322	322	3.4	0	0	0	0	0	4516500	0	0	0
Nuclear movement protein, putative	EHI_023890	C4M7J1	C4M7J1	22.0956	19	19	19	19	19	0.495025	0.538685	1.03185			1	1	0	0	0	0	0	1	5.2	5.2	5.2	17.597	0.010047	0.83735	4481500	7	1	1	0	0	0	0	0	153	153	5.2	0	0	0	0	0	4481500	0	0	0
Uncharacterized protein	EHI_056250	C4M8R2	C4M8R2	19	19	22.0952	19	19	19	0.495025	0.538685	1.03172			1	0	0	1	0	0	0	1	5.8	5.8	5.8	32.205	0.00075529	2.2155	4480300	13	1	0	0	1	0	0	0	278	278	0	0	5.8	0	0	0	0	0	4480300	0
NADP-dependent alcohol dehydrogenase, putative	EHI_042260	C4M4I0	C4M4I0	22.0836	19	19	19	19	19	0.495025	0.538685	1.02785			1	1	0	0	0	0	0	1	3.8	3.8	3.8	38.103	0.010143	0.88637	4444400	14	1	1	0	0	0	0	0	343	343	3.8	0	0	0	0	0	4444400	0	0	0
HEAT repeat domain containing protein	EHI_060990	C4M9N3	C4M9N3	22.078	19	19	19	19	19	0.495025	0.538685	1.02599			2	2	2	0	0	0	0	2	3.1	3.1	3.1	91.002	0	3.7766	4427200	30	5	2	2	0	0	0	0	807	807	3.1	3.1	0	0	0	0	4427200	0	0	0
RING-type domain-containing protein	EHI_065850	C4M001	C4M001	22.0776	19	19	19	19	19	0.495025	0.538685	1.02586			1	1	0	0	0	0	0	1	1.5	1.5	1.5	126.65	0.00076453	2.2874	4426000	49	1	1	0	0	0	0	0	1092	1092	1.5	0	0	0	0	0	4426000	0	0	0
Serine/threonine-protein phosphatase	EHI_011950	C4LTI9	C4LTI9	19	19	22.0739	19	19	19	0.495025	0.538685	1.02463			2	0	0	1	1	0	0	2	8.7	8.7	8.7	35.185	0	3.9722	4414700	18	2	0	0	1	1	0	0	309	309	0	0	5.5	3.2	0	0	0	0	4414700	0
V-type ATPase, D subunit, putative	EHI_056390	C4M6Y9	C4M6Y9	19	22.054	19	19	19	19	0.495025	0.538685	1.018			1	0	1	1	0	0	0	1	4	4	4	28.768	0.0032595	1.3031	4354300	14	2	0	1	1	0	0	0	253	253	0	4	4	0	0	0	0	4354300	0	0
Cullin family profile domain-containing protein	EHI_179950	C4M646	C4M646	19	22.0422	19	19	19	19	0.495025	0.538685	1.01407			1	0	1	0	0	0	0	1	2.2	2.2	2.2	73.942	0.010041	0.83678	4318800	38	1	0	1	0	0	0	0	639	639	0	2.2	0	0	0	0	0	4318800	0	0
Peptidyl-prolyl cis-trans isomerase	EHI_083580	C4M942	C4M942	22.0207	19	19	19	19	19	0.495025	0.538685	1.00689			1	1	0	0	0	0	0	1	6	6	6	22.195	0.0099415	0.79291	4254800	9	1	1	0	0	0	0	0	199	199	6	0	0	0	0	0	4254800	0	0	0
Cleavage and polyadenylation specificity factor subunit 2	EHI_033130	C4M6Y0	C4M6Y0	22.0161	19	19	19	19	19	0.495025	0.538685	1.00536			1	1	0	0	0	0	0	1	2.9	2.9	2.9	59.07	0.0062893	1.1178	4241300	27	1	1	0	0	0	0	0	514	514	2.9	0	0	0	0	0	4241300	0	0	0
V-type proton ATPase subunit F	EHI_007940	C4LYD1	C4LYD1	19	21.9892	19	19	19	19	0.495025	0.538685	0.996386			1	1	1	0	0	0	0	1	8.5	8.5	8.5	14.681	0.0013523	1.4721	4162900	9	1	1	1	0	0	0	0	130	130	8.5	8.5	0	0	0	0	0	4162900	0	0
Sec24 protein, putative	EHI_042990	A0A8U0WNY0	A0A8U0WNY0	21.982	19	19	19	19	19	0.495025	0.538685	0.993989			1	1	0	0	0	0	0	1	1.3	1.3	1.3	71.265	0.0038735	1.2311	4142200	33	1	1	0	0	0	0	0	618	618	1.3	0	0	0	0	0	4142200	0	0	0
DEAD/DEAH box helicase, putative	EHI_131080	C4LXH6	C4LXH6	21.9813	19	19	19	19	19	0.495025	0.538685	0.993768			1	1	0	0	0	0	0	1	1	1	1	205.69	0	6.5176	4140300	92	1	1	0	0	0	0	0	1804	1804	1	0	0	0	0	0	4140300	0	0	0
Heat shock protein, Hsp20 family	EHI_125830	A0A8U0WPM5	A0A8U0WPM5	19	19	21.9772	19	19	19	0.495025	0.538685	0.992395			1	0	0	1	0	0	0	1	8.6	8.6	8.6	15.906	0.00073153	2.0183	4128500	9	1	0	0	1	0	0	0	139	139	0	0	8.6	0	0	0	0	0	4128500	0
Leucine-rich repeat containing protein	EHI_068190	C4LU12	C4LU12	21.9746	19	19	19	19	19	0.495025	0.538685	0.991521			1	1	0	0	0	0	0	1	2.9	2.9	2.9	47.188	0.003861	1.2201	4121000	22	1	1	0	0	0	0	0	414	414	2.9	0	0	0	0	0	4121000	0	0	0
RING-type domain-containing protein	EHI_069240	C4LWL2	C4LWL2	19	19	21.9706	19	19	19	0.495025	0.538685	0.990189			2	0	0	2	0	0	0	2	2.6	2.6	2.6	96.728	0.010077	0.85386	4109600	45	2	0	0	2	0	0	0	820	820	0	0	2.6	0	0	0	0	0	4109600	0
Uncharacterized protein	EHI_110440	C4LU96	C4LU96	21.9635	19	19	19	19	19	0.495025	0.538685	0.987819			1	1	1	0	0	0	0	1	4.3	4.3	4.3	38.895	0.0013333	1.3869	4089400	22	1	1	1	0	0	0	0	329	329	4.3	4.3	0	0	0	0	4089400	0	0	0
Peptidyl-prolyl cis-trans isomerase	EHI_044730	C4LT92	C4LT92	19	19	21.9461	19	19	19	0.495025	0.538685	0.982046			2	1	0	1	0	0	0	2	20.8	20.8	20.8	13.257	0	6.7574	4040600	5	2	1	0	1	0	0	0	120	120	5.8	0	15	0	0	0	0	0	4040600	0
Longevity-assurance family protein	EHI_151290	C4LSH2	C4LSH2	21.946	19	19	19	19	19	0.495025	0.538685	0.982011			1	1	0	0	0	0	0	1	4.3	4.3	4.3	38.431	0	4.1361	4040300	15	1	1	0	0	0	0	0	327	327	4.3	0	0	0	0	0	4040300	0	0	0
Leucine-rich repeat containing protein	EHI_183440	C4M723	C4M723	19	19	21.9374	19	19	19	0.495025	0.538685	0.979122			1	0	0	1	0	0	0	1	2.5	2.5	2.5	76.469	0	9.878	4016100	35	1	0	0	1	0	0	0	674	674	0	0	2.5	0	0	0	0	0	4016100	0
Tryptophanase, putative	EHI_111610	C4M571	C4M571	19	19	21.9298	19	19	19	0.495025	0.538685	0.9766			1	0	0	1	0	0	0	1	1.5	1.5	1.5	61.885	0.010253	0.93059	3995100	30	1	0	0	1	0	0	0	538	538	0	0	1.5	0	0	0	0	0	3995100	0
Uncharacterized protein	EHI_123710	B1N4T8	B1N4T8	21.927	19	19	19	19	19	0.495025	0.538685	0.97566			1	1	0	0	0	0	0	1	11.2	11.2	11.2	14.652	0.0080545	1.0647	3987300	4	1	1	0	0	0	0	0	125	125	11.2	0	0	0	0	0	3987300	0	0	0
Malate dehydrogenase	EHI_030810	A0A8U0WPY4	A0A8U0WPY4	19	21.926	19	19	19	19	0.495025	0.538685	0.975335			1	0	1	0	0	0	0	1	17.2	2.5	2.5	39.284	0.0098895	0.77005	3984600	22	1	0	1	0	0	0	0	355	355	10.1	17.2	14.6	11.3	6.8	0	0	3984600	0	0
DNA-directed RNA polymerase subunit beta	EHI_186020	C4MAB3	C4MAB3	21.9174	19	19	19	19	19	0.495025	0.538685	0.972466			1	1	0	0	0	0	0	1	1.5	1.5	1.5	125.04	0.0013587	1.513	3960900	47	2	1	0	0	0	0	0	1106	1106	1.5	0	0	0	0	0	3960900	0	0	0
Zinc ribbon domain-containing protein	EHI_164360	C4M1R8	C4M1R8	21.8538	19	19	19	19	19	0.495025	0.538685	0.951255			1	1	0	0	0	0	0	1	7.6	7.6	7.6	27.987	0	19.128	3790000	14	1	1	0	0	0	0	0	250	250	7.6	0	0	0	0	0	3790000	0	0	0
Uncharacterized protein	EHI_118120	C4LYZ6	C4LYZ6	19	19	21.8522	19	19	19	0.495025	0.538685	0.950735			1	0	0	1	1	0	0	1	1.8	1.8	1.8	86.266	0.0099299	0.79084	3785900	36	2	0	0	1	1	0	0	771	771	0	0	1.8	1.8	0	0	0	0	3785900	0
Viral A-type inclusion protein repeat, putative	EHI_093850	C4LYH6	C4LYH6	21.8511	19	19	19	19	19	0.495025	0.538685	0.950379			1	1	0	0	0	0	0	1	0.6	0.6	0.6	166.33	0.010198	0.90735	3783100	74	1	1	0	0	0	0	0	1387	1387	0.6	0	0	0	0	0	3783100	0	0	0
Vacuolar protein sorting-associated protein 54 C-terminal domain-containing protein	EHI_189870	C4M709	C4M709	19	21.8194	19	19	19	19	0.495025	0.538685	0.939802			1	0	1	0	0	0	0	1	1.1	1.1	1.1	103.75	0.0068621	1.0918	3700800	43	1	0	1	0	0	0	0	898	898	0	1.1	0	0	0	0	0	3700800	0	0
Orn/Arg/Lys decarboxylase, putative	EHI_098380	C4LXC0	C4LXC0	19	19	21.811	19	19	19	0.495025	0.538685	0.937			1	0	0	1	0	0	0	1	1.3	1.3	1.3	105.07	0.0013793	1.6109	3679300	52	1	0	0	1	0	0	0	925	925	0	0	1.3	0	0	0	0	0	3679300	0
Autophagocytosis protein, putative	EHI_194330	C4LZU7	C4LZU7	19	19	21.8054	19	19	19	0.495025	0.538685	0.935141			1	0	0	1	0	0	0	1	6.3	6.3	6.3	30.615	1	-2	3665100	14	1	0	0	1	0	0	0	268	268	0	0	6.3	0	0	0	0	0	3665100	0
Uncharacterized protein	EHI_086570	C4M8Z3	C4M8Z3	19	19	21.7959	19	19	19	0.495025	0.538685	0.931981			1	0	0	1	0	0	0	1	1.9	1.9	1.9	68.831	0.00071839	1.9043	3641100	26	1	0	0	1	0	0	0	589	589	0	0	1.9	0	0	0	0	0	3641100	0
Glutamine cyclotransferase, putative	EHI_058820	C4M5G7	C4M5G7	19	19	21.7957	19	19	19	0.495025	0.538685	0.931915			1	0	0	1	0	0	0	1	9.1	9.1	9.1	29.351	0	3.0208	3640600	12	2	0	0	1	0	0	0	253	253	0	0	9.1	0	0	0	0	0	3640600	0
Ras-GAP domain-containing protein	EHI_182150	C4MBN4;C4M4W1	C4MBN4;C4M4W1	19	19	21.7843	19	19	19	0.495025	0.538685	0.928095			1	0	0	1	0	0	0	1	3.6	3.6	3.6	45.937	0	3.6695	3611800	26	0	0	0	1	0	0	0	393	NaN	0	0	3.6	0	0	0	0	0	3611800	0
Meiosis-specific nuclear structural protein	EHI_175120	C4LZN7	C4LZN7	21.7803	19	19	19	19	19	0.495025	0.538685	0.926762			1	1	0	0	0	0	0	1	2.3	2.3	2.3	60.683	0.00074683	2.1542	3601800	27	1	1	0	0	0	0	0	516	516	2.3	0	0	0	0	0	3601800	0	0	0
Syntaxin 5-like protein, putative	EHI_080870	B1N4Q5	B1N4Q5	19	19	21.7752	19	19	19	0.495025	0.538685	0.925063			1	0	0	1	0	0	0	1	4.7	4.7	4.7	35.013	0.0097087	0.9643	3589100	11	1	0	0	1	0	0	0	300	300	0	0	4.7	0	0	0	0	0	3589100	0
JAB1/MPN/MOV34 metalloenzyme domain-containing protein	EHI_112800	C4M9L9	C4M9L9	21.7636	19	19	19	19	19	0.495025	0.538685	0.921202			1	1	0	0	0	0	0	1	8.5	8.5	8.5	18.198	0.0013671	1.5773	3560400	12	1	1	0	0	0	0	0	164	164	8.5	0	0	0	0	0	3560400	0	0	0
NEDD8-activating enzyme E1 catalytic subunit	EHI_098550	C4LXD5	C4LXD5	21.763	19	19	19	19	19	0.495025	0.538685	0.921014			1	1	0	0	0	0	0	1	3.6	3.6	3.6	46.734	0	2.2968	3559000	22	1	1	0	0	0	0	0	422	422	3.6	0	0	0	0	0	3559000	0	0	0
Phosphoglycerate mutase family protein	EHI_129820	C4M5P9	C4M5P9	19	19	21.7552	19	19	19	0.495025	0.538685	0.918399			1	0	0	1	0	0	0	1	12.2	12.2	12.2	22.914	0	5.1248	3539700	12	2	0	0	1	0	0	0	205	205	0	0	12.2	0	0	0	0	0	3539700	0
Uncharacterized protein	EHI_125940	C4LVX9	C4LVX9	19	21.7498	19	19	19	19	0.495025	0.538685	0.916588			2	1	2	1	0	0	0	2	9.3	9.3	9.3	28.62	0	5.3685	3526400	9	4	1	2	1	0	0	0	248	248	6.5	9.3	6.5	0	0	0	0	3526400	0	0
Protein kinase, putative	EHI_118080	C4LYZ2	C4LYZ2	19	19	21.7457	19	19	19	0.495025	0.538685	0.915223			1	0	0	1	0	0	0	1	3.7	3.7	3.7	76.644	0.0056998	1.1391	3516400	33	2	0	0	1	0	0	0	675	675	0	0	3.7	0	0	0	0	0	3516400	0
TPR repeat protein	EHI_023300	C4LUP1	C4LUP1	19	21.7408	19	19	19	19	0.495025	0.538685	0.913593			1	0	1	0	0	0	0	1	2.3	2.3	2.3	65.447	0.0013298	1.3732	3504500	36	1	0	1	0	0	0	0	564	564	0	2.3	0	0	0	0	0	3504500	0	0
Activating signal cointegrator 1 complex subunit 1, putative	EHI_128160	C4M534	C4M534	19	19	21.7172	19	19	19	0.495025	0.538685	0.905734			1	1	0	1	0	0	0	1	2.3	2.3	2.3	39.705	1	-2	3447700	22	2	1	0	1	0	0	0	349	349	2.3	0	2.3	0	0	0	0	0	3447700	0
TLDc domain-containing protein	EHI_161020	C4M2R9	C4M2R9	19	19	21.7024	19	19	19	0.495025	0.538685	0.900799			1	0	0	1	0	0	0	1	3.8	3.8	3.8	45.603	0.00070373	1.7612	3412500	20	1	0	0	1	0	0	0	394	394	0	0	3.8	0	0	0	0	0	3412500	0
DNA polymerase delta small subunit	EHI_141410	B1N2R6	B1N2R6	21.6988	19	19	19	19	19	0.495025	0.538685	0.899614			1	1	0	0	0	0	0	1	3	3	3	44.641	0.0038835	1.2502	3404100	19	1	1	0	0	0	0	0	395	395	3	0	0	0	0	0	3404100	0	0	0
GPI mannosyltransferase 1	EHI_029580	C4M7V9	C4M7V9	19	21.6932	19	19	19	19	0.495025	0.538685	0.897746			1	1	1	0	0	0	0	1	2.7	2.7	2.7	48.681	0.0080197	1.0341	3390900	17	2	1	1	0	0	0	0	412	412	2.7	2.7	0	0	0	0	0	3390900	0	0
Pre-mRNA splicing factor, putative	EHI_093960	C4LYI7	C4LYI7	19	21.6932	19	19	19	19	0.495025	0.538685	0.897731			1	1	1	1	0	0	0	1	1.3	1.3	1.3	100.71	0	7.837	3390800	51	3	1	1	1	0	0	0	870	870	1.3	1.3	1.3	0	0	0	0	3390800	0	0
Exocyst complex component Sec3 C-terminal domain-containing protein	EHI_148590	C4LT29	C4LT29	21.6765	19	19	19	19	19	0.495025	0.538685	0.892183			1	1	0	1	0	0	0	1	1.1	1.1	1.1	111.3	0.009828	1.0112	3351900	59	2	1	0	1	0	0	0	959	959	1.1	0	1.1	0	0	0	3351900	0	0	0
Rab family GTPase	EHI_068230	A0A8U0WPQ5	A0A8U0WPQ5	19	21.6458	19	19	19	19	0.495025	0.538685	0.881945			1	0	1	0	0	0	0	1	9.3	9.3	9.3	22.558	0.0013908	1.6764	3281300	10	1	0	1	0	0	0	0	204	204	0	9.3	0	0	0	0	0	3281300	0	0
Ubiquitin carboxyl-terminal hydrolase family protein	EHI_008680	C4M0N2	C4M0N2	21.6353	19	19	19	19	19	0.495025	0.538685	0.87843			2	1	1	0	0	0	0	2	3	3	3	87.99	1	-2	3257400	42	1	1	1	0	0	0	0	758	758	1.3	1.7	0	0	0	0	3257400	0	0	0
Trafficking protein particle complex subunit 11 C-terminal domain-containing protein	EHI_018490	B1N5G5	B1N5G5	21.6333	19	19	19	19	19	0.495025	0.538685	0.87778			1	1	0	0	0	0	0	1	1.8	1.8	1.8	99.058	0.00071633	1.8854	3253000	38	0	1	0	0	0	0	0	866	866	1.8	0	0	0	0	0	3253000	0	0	0
CCR4-not transcription complex	EHI_200810	C4M3Y6	C4M3Y6	19	21.6328	19	19	19	19	0.495025	0.538685	0.877588			2	1	2	0	0	0	0	2	1.4	1.4	1.4	183.6	0.010247	0.92963	3251700	83	3	1	2	0	0	0	0	1598	1598	0.6	1.4	0	0	0	0	0	3251700	0	0
Uncharacterized protein	EHI_104740	C4LZ82	C4LZ82	19	19	21.6313	19	19	19	0.495025	0.538685	0.877099			1	0	0	1	0	0	0	1	9.8	9.8	9.8	21.804	0.0019789	1.3441	3248400	11	1	0	0	1	0	0	0	194	194	0	0	9.8	0	0	0	0	0	3248400	0
1-phosphatidylinositol 4-kinase	EHI_148700	C4LT40	C4LT40	19	19	21.6113	19	19	19	0.495025	0.538685	0.870436			1	0	0	1	0	0	0	1	0.7	0.7	0.7	190.89	0.0019841	1.3535	3203700	92	0	0	0	1	0	0	0	1656	1656	0	0	0.7	0	0	0	0	0	3203700	0
Peptidase S74 domain-containing protein	EHI_178450	C4LUR1	C4LUR1	19	21.5966	19	19	19	19	0.495025	0.538685	0.865548			1	0	1	0	0	0	0	1	2.2	2.2	2.2	71.42	0	5.8402	3171300	21	0	0	1	0	0	0	0	626	626	0	2.2	0	0	0	0	0	3171300	0	0
tRNA:m(4)X modification enzyme TRM13	EHI_063140	B1N5K8;C4M100	B1N5K8;C4M100	19	21.563	19	19	19	19	0.495025	0.538685	0.854349			1	0	1	1	0	0	0	1	9.4	9.4	9.4	14.35	0	3.7832	3098300	9	2	0	1	1	0	0	0	128	NaN	0	9.4	9.4	0	0	0	0	3098300	0	0
Rab family GTPase	EHI_192130	A0A8U0WPN2	A0A8U0WPN2	21.5629	19	19	19	19	19	0.495025	0.538685	0.854302			1	1	0	0	0	0	0	1	14.9	10	10	22.419	0.00072727	1.9712	3098000	10	1	1	0	0	0	0	0	201	201	14.9	0	0	0	0	0	3098000	0	0	0
Ubiquitin-conjugating enzyme family protein	EHI_150370	C4M218	C4M218	19	21.5356	19	19	19	19	0.495025	0.538685	0.845214			1	0	1	0	0	0	0	1	7.5	7.5	7.5	18.421	1	-2	3040000	7	1	0	1	0	0	0	0	159	159	0	7.5	0	0	0	0	0	3040000	0	0
EGF-like domain-containing protein	EHI_148940	C4LT61	C4LT61	19	19	21.5173	19	19	19	0.495025	0.538685	0.8391			1	0	1	1	0	0	0	1	2.4	2.4	2.4	59.269	0.0013351	1.4022	3001600	19	2	0	1	1	0	0	0	504	504	0	2.4	2.4	0	0	0	0	0	3001600	0
Uncharacterized protein	EHI_063790	C4MAZ5	C4MAZ5	21.5065	19	19	19	19	19	0.495025	0.538685	0.835498			1	1	0	0	0	0	0	1	8.6	8.6	8.6	24.66	0	4.862	2979200	10	1	1	0	0	0	0	0	209	209	8.6	0	0	0	0	0	2979200	0	0	0
WW domain-containing protein	EHI_188220	C4M196	C4M196	21.5005	19	19	19	19	19	0.495025	0.538685	0.833492			1	1	0	0	0	0	0	1	2.3	2.3	2.3	90.097	0	3.1715	2966800	44	1	1	0	0	0	0	0	782	782	2.3	0	0	0	0	0	2966800	0	0	0
Mic1 domain-containing protein	EHI_126970	C4LWX3	C4LWX3	19	21.489	19	19	19	19	0.495025	0.538685	0.829667			1	0	1	0	0	0	0	1	1.4	1.4	1.4	106.26	0.0013596	1.525	2943300	56	1	0	1	0	0	0	0	917	917	0	1.4	0	0	0	0	0	2943300	0	0
Palmitoyltransferase	EHI_119280	C4M4X7	C4M4X7	19	21.4532	19	19	19	19	0.495025	0.538685	0.817724			1	0	1	0	0	0	0	1	2.3	2.3	2.3	41.114	1	-2	2871100	17	1	0	1	0	0	0	0	352	352	0	2.3	0	0	0	0	0	2871100	0	0
NTF2 domain-containing protein	EHI_035490	C4LXY0	C4LXY0	19	21.4365	19	19	19	19	0.495025	0.538685	0.812181			1	0	1	0	0	0	0	1	2.6	2.6	2.6	60.776	0	2.5098	2838200	25	1	0	1	0	0	0	0	536	536	0	2.6	0	0	0	0	0	2838200	0	0
Uncharacterized protein	EHI_161880	C4M6N1	C4M6N1	21.4343	19	19	19	19	19	0.495025	0.538685	0.811419			1	1	0	0	0	0	0	1	8.7	8.7	8.7	20.115	0	2.3344	2833700	11	1	1	0	0	0	0	0	173	173	8.7	0	0	0	0	0	2833700	0	0	0
Uncharacterized protein	EHI_009560	C4LZ31	C4LZ31	19	19	21.4339	19	19	19	0.495025	0.538685	0.8113			1	0	0	1	0	0	0	1	5.7	5.7	5.7	35.991	0	11.776	2833000	13	1	0	0	1	0	0	0	317	317	0	0	5.7	0	0	0	0	0	2833000	0
Protein kinase domain containing protein	EHI_029590	C4M7W0	C4M7W0	19	19	21.4097	19	19	19	0.495025	0.538685	0.803237			1	0	0	1	0	0	0	1	1.7	1.7	1.7	69.317	0.009901	0.77773	2785900	35	0	0	0	1	0	0	0	589	589	0	0	1.7	0	0	0	0	0	2785900	0
LIM zinc finger domain containing protein	EHI_096420	C4LWF5	C4LWF5	19	21.375	19	19	19	19	0.495025	0.538685	0.791672			1	0	1	0	0	0	0	1	9	9	9	15.977	0.0013307	1.3732	2719700	8	1	0	1	0	0	0	0	145	145	0	9	0	0	0	0	0	2719700	0	0
Uncharacterized protein	EHI_173460	C4M6I5	C4M6I5	19	19	21.3717	19	19	19	0.495025	0.538685	0.790574			2	1	0	1	0	0	0	2	4	4	4	97.498	0	5.396	2713500	39	2	1	0	1	0	0	0	870	870	2.4	0	1.6	0	0	0	0	0	2713500	0
Molybdenum cofactor sulfurase, putative	EHI_008070	C4LYE2	C4LYE2	21.272	19	19	19	19	19	0.495025	0.538685	0.75732			1	1	0	0	0	0	0	1	3.1	3.1	3.1	54.697	0.0099765	0.81006	2532200	22	1	1	0	0	0	0	0	484	484	3.1	0	0	0	0	0	2532200	0	0	0
DNA-directed RNA polymerases I, II, and III subunit RPABC3	EHI_038570	C4LZP1	C4LZP1	19	19	21.2664	19	19	19	0.495025	0.538685	0.755455			1	0	0	1	1	1	0	1	9.8	9.8	9.8	16.246	0	3.1247	2522400	8	4	0	0	1	1	1	0	143	143	0	0	9.8	9.8	9.8	0	0	0	2522400	0
Serine/threonine-protein kinase 3, putative	EHI_156670	C4MB14	C4MB14	21.256	19	19	19	19	19	0.495025	0.538685	0.751992			1	1	0	0	0	0	0	1	3.4	3.4	3.4	39.962	0.007472	1.0778	2504300	22	1	1	0	0	0	0	0	354	354	3.4	0	0	0	0	0	2504300	0	0	0
non-specific serine/threonine protein kinase	EHI_155360	C4LW89	C4LW89	19	19	21.2414	19	19	19	0.495025	0.538685	0.747128			1	0	0	1	0	0	0	1	3.9	3.9	3.9	26.65	0.009878	0.76394	2479100	15	1	0	0	1	0	0	0	231	231	0	0	3.9	0	0	0	0	0	2479100	0
Scavenger mRNA decapping enzyme, putative	EHI_192480	C4M1G8	C4M1G8	19	19	21.1734	19	19	19	0.495025	0.538685	0.72447			1	1	0	1	0	0	0	1	5	5	5	32.888	0.0013708	1.5823	2365000	13	2	1	0	1	0	0	0	281	281	5	0	5	0	0	0	0	0	2365000	0
Tyrosine kinase, putative	EHI_117590	C4M674	C4M674	19	19	21.1606	19	19	19	0.495025	0.538685	0.720201			1	1	0	1	0	0	0	1	2.3	1.6	1.6	115.75	0.0026127	1.3057	2344100	49	2	1	0	1	0	0	0	1029	1029	2.3	0	1.6	0	0	0	0	0	2344100	0
PH-protein kinase domain containing protein	EHI_088110	C4M6R9	C4M6R9	21.1357	19	19	19	19	19	0.495025	0.538685	0.711903			1	1	0	1	0	0	0	1	4.1	4.1	4.1	66.675	0	2.3219	2304000	33	3	1	0	1	0	0	0	579	579	4.1	0	4.1	0	0	0	2304000	0	0	0
RNA recognition motif domain containing protein	EHI_183100	C4LV83	C4LV83	19	21.1108	19	19	19	19	0.495025	0.538685	0.703587			1	0	1	1	0	0	0	1	4.2	4.2	4.2	45.158	0	3.3415	2264500	25	2	0	1	1	0	0	0	381	381	0	4.2	4.2	0	0	0	0	2264500	0	0
Protein kinase domain-containing protein	EHI_098760	C4M873	C4M873	19	19	21.0622	19	19	19	0.495025	0.538685	0.687412			1	0	0	1	0	0	0	1	1.1	1.1	1.1	132.21	0.010204	0.90958	2189600	53	1	0	0	1	0	0	0	1139	1139	0	0	1.1	0	0	0	0	0	2189600	0
[truncated: 183 more rows]
[truncated: 6 more columns]

## Sheet: Legend
.Legend
[truncated: 5 more rows]
